# Supplementary material for: Accurate and efficient detection of gene fusions from RNA sequencing data
Source: PubMed Central journal article supplement (PMC7919457; doi:10.1101/gr.257246.119), 2021-03
Supplement: supp_gr.257246.119_Supplemental_Figure_S1.pdf [file supp_gr.257246.119_Supplemental_Figure_S1.pdf]

**A**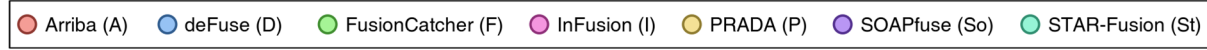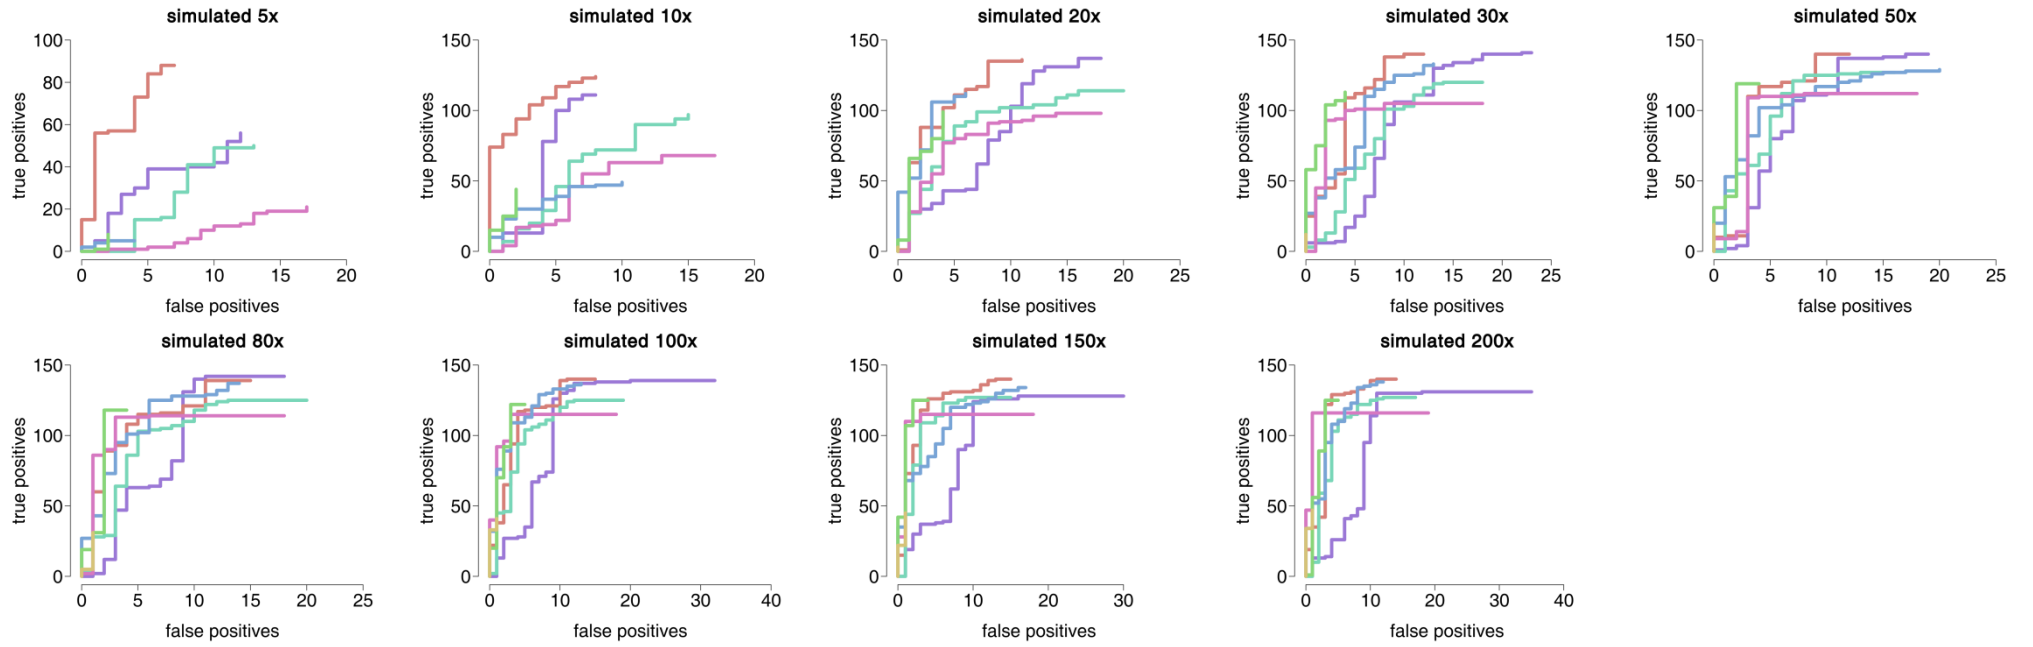

**B**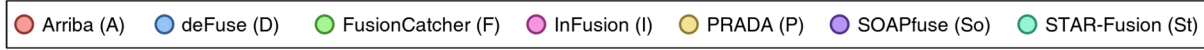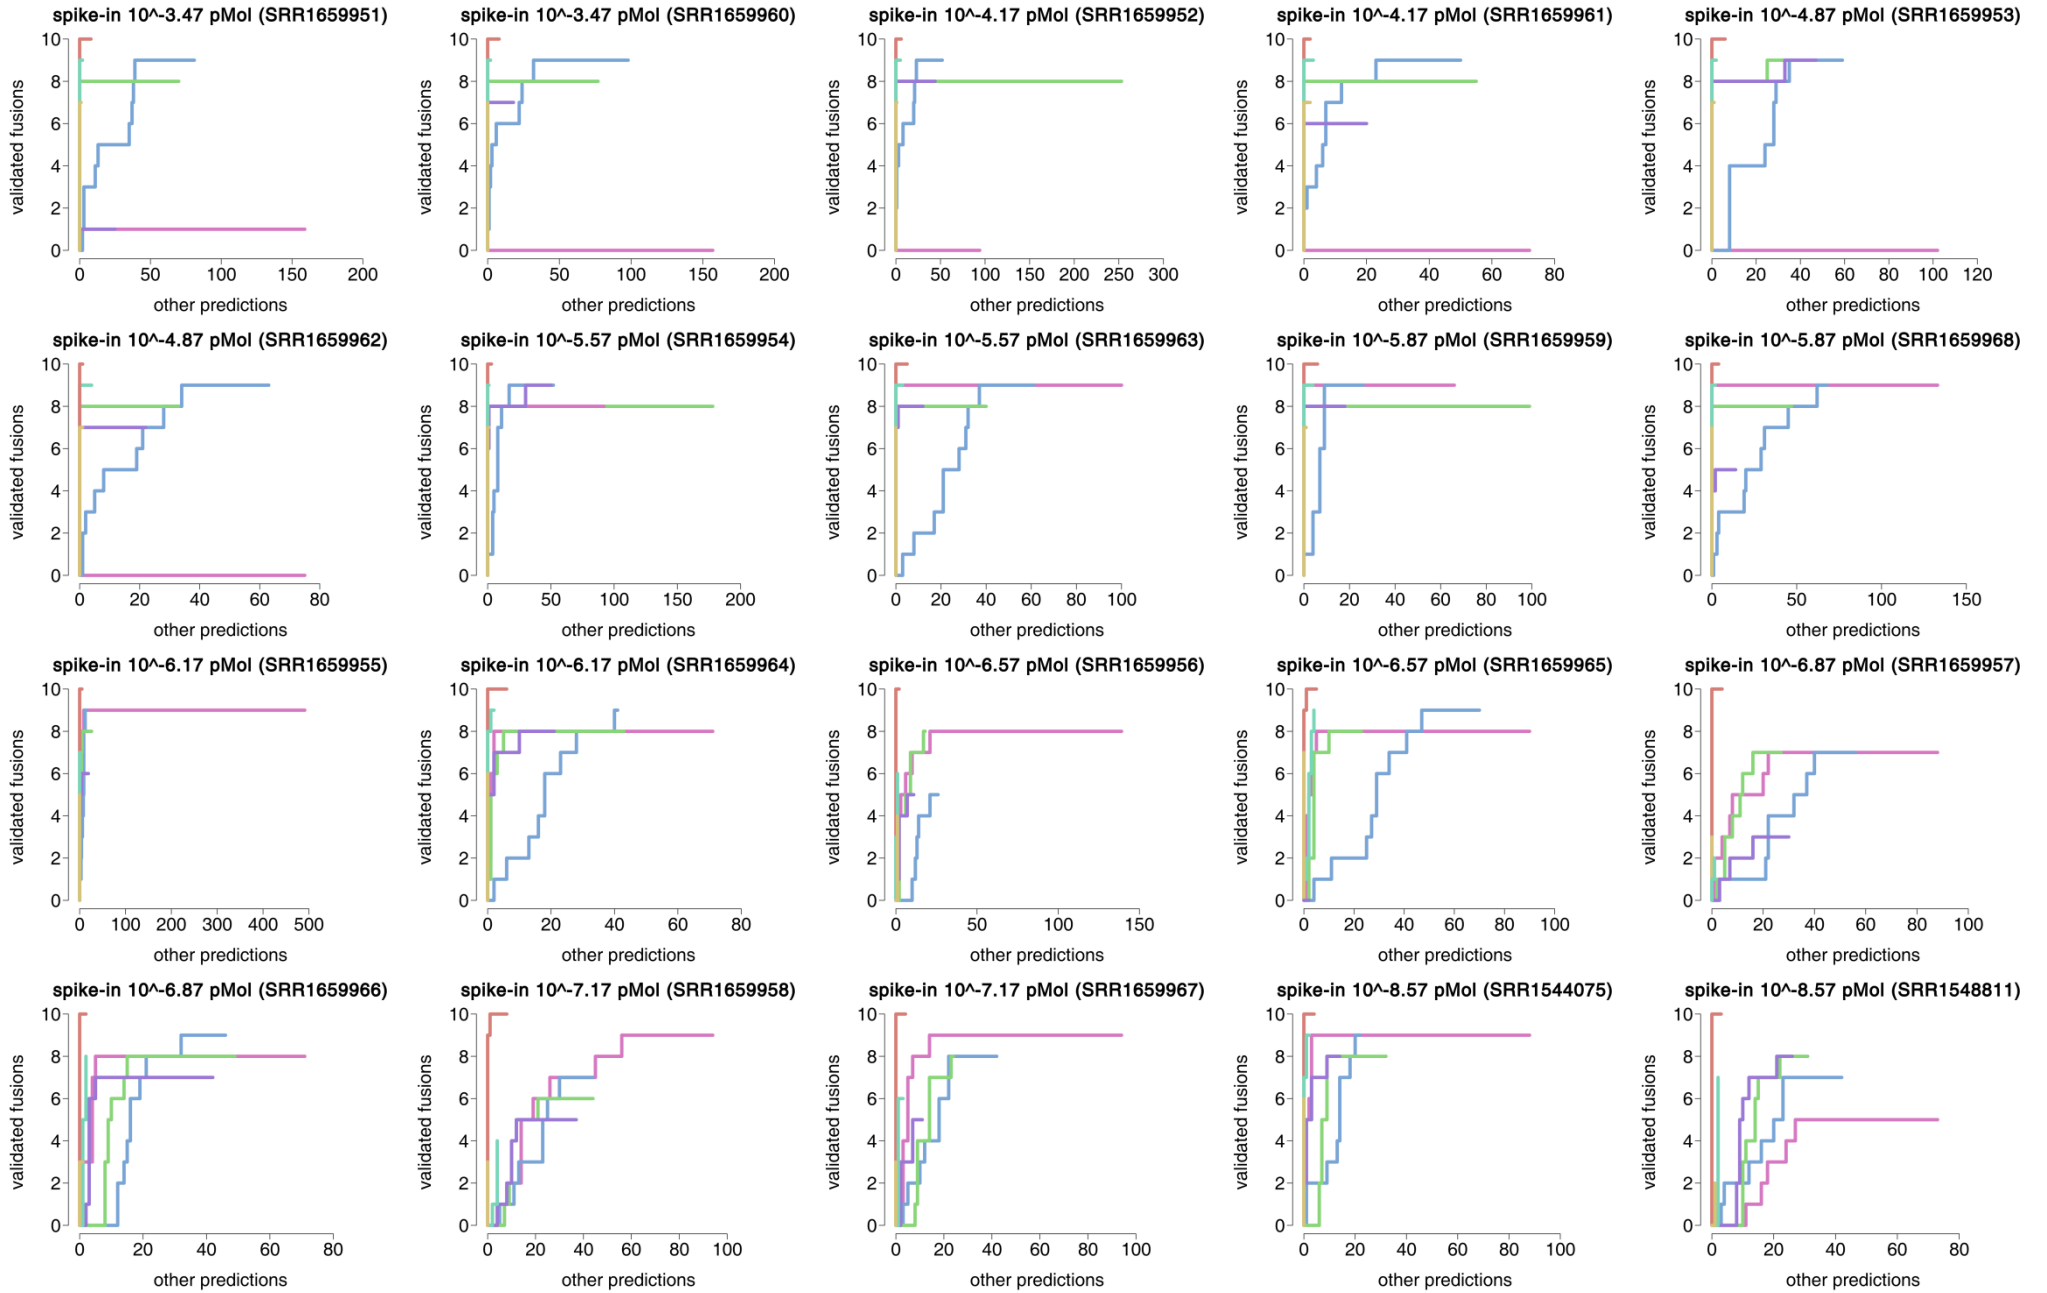

C

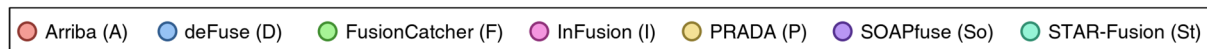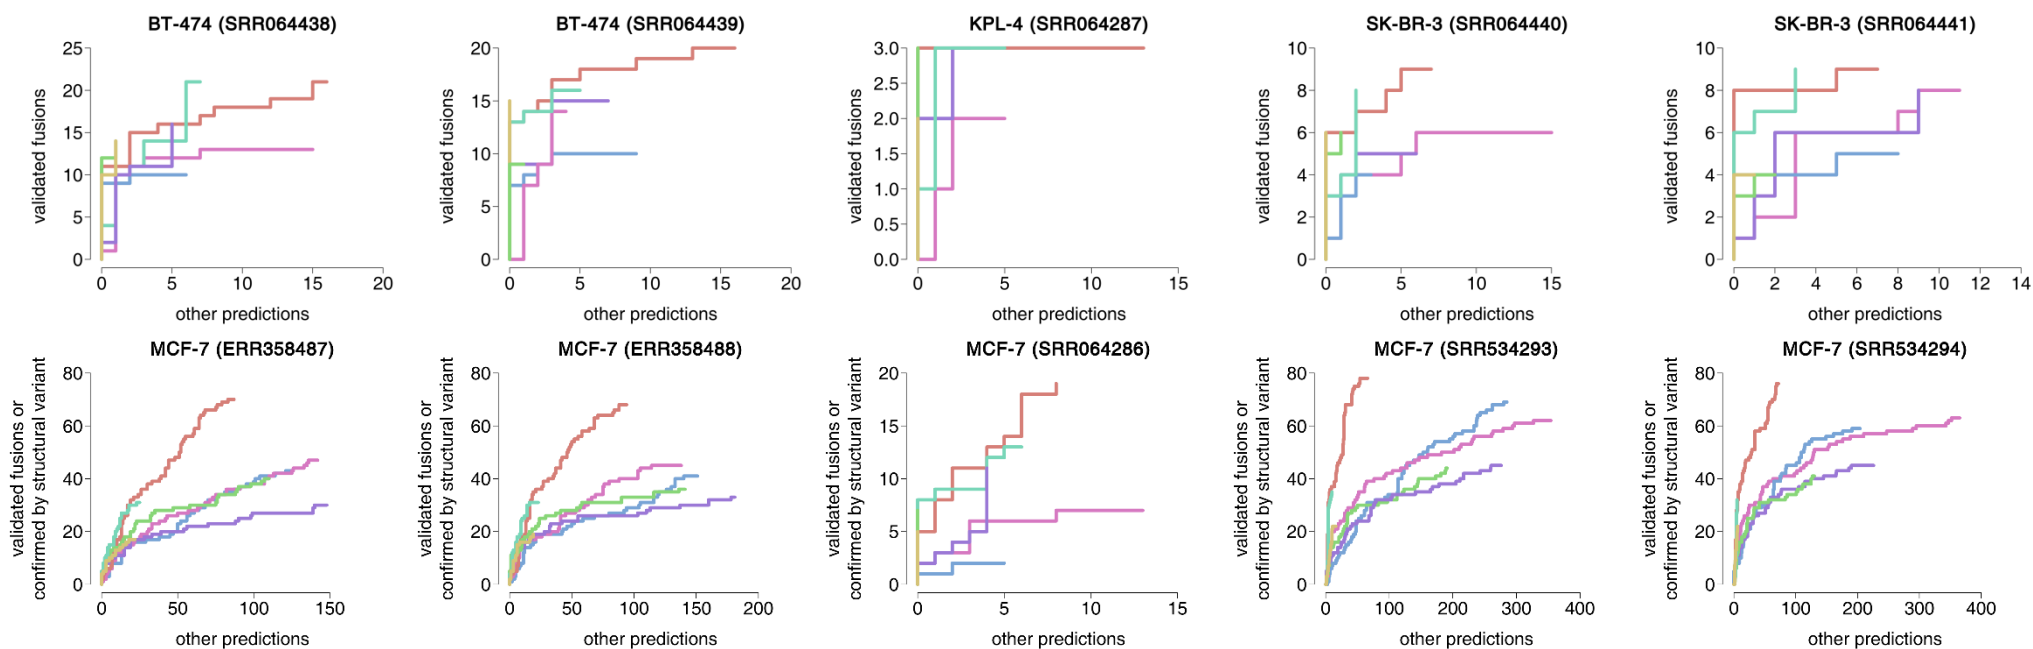

### Supplemental Figure S1: Accuracy of all tools on all benchmark datasets.

The sensitivity/specificity trade-off is depicted using receiver operating characteristic (ROC)-like curves. The vertical axis indicates the number of true positives; the horizontal axis indicates the number of false positives (simulated dataset) or non-validated predictions (spike-in and cell line datasets). Only gene-to-gene fusions were considered. (A) Simulated data. (B) Spike-ins of synthetic fusions. (C) Cell lines.
