# Supplementary material for: Accurate and efficient detection of gene fusions from RNA sequencing data
Source: PubMed Central journal article supplement (PMC7919457; doi:10.1101/gr.257246.119), 2021-03
Supplement: supp_gr.257246.119_Supplemental_Figure_S2.pdf [file supp_gr.257246.119_Supplemental_Figure_S2.pdf]

**A**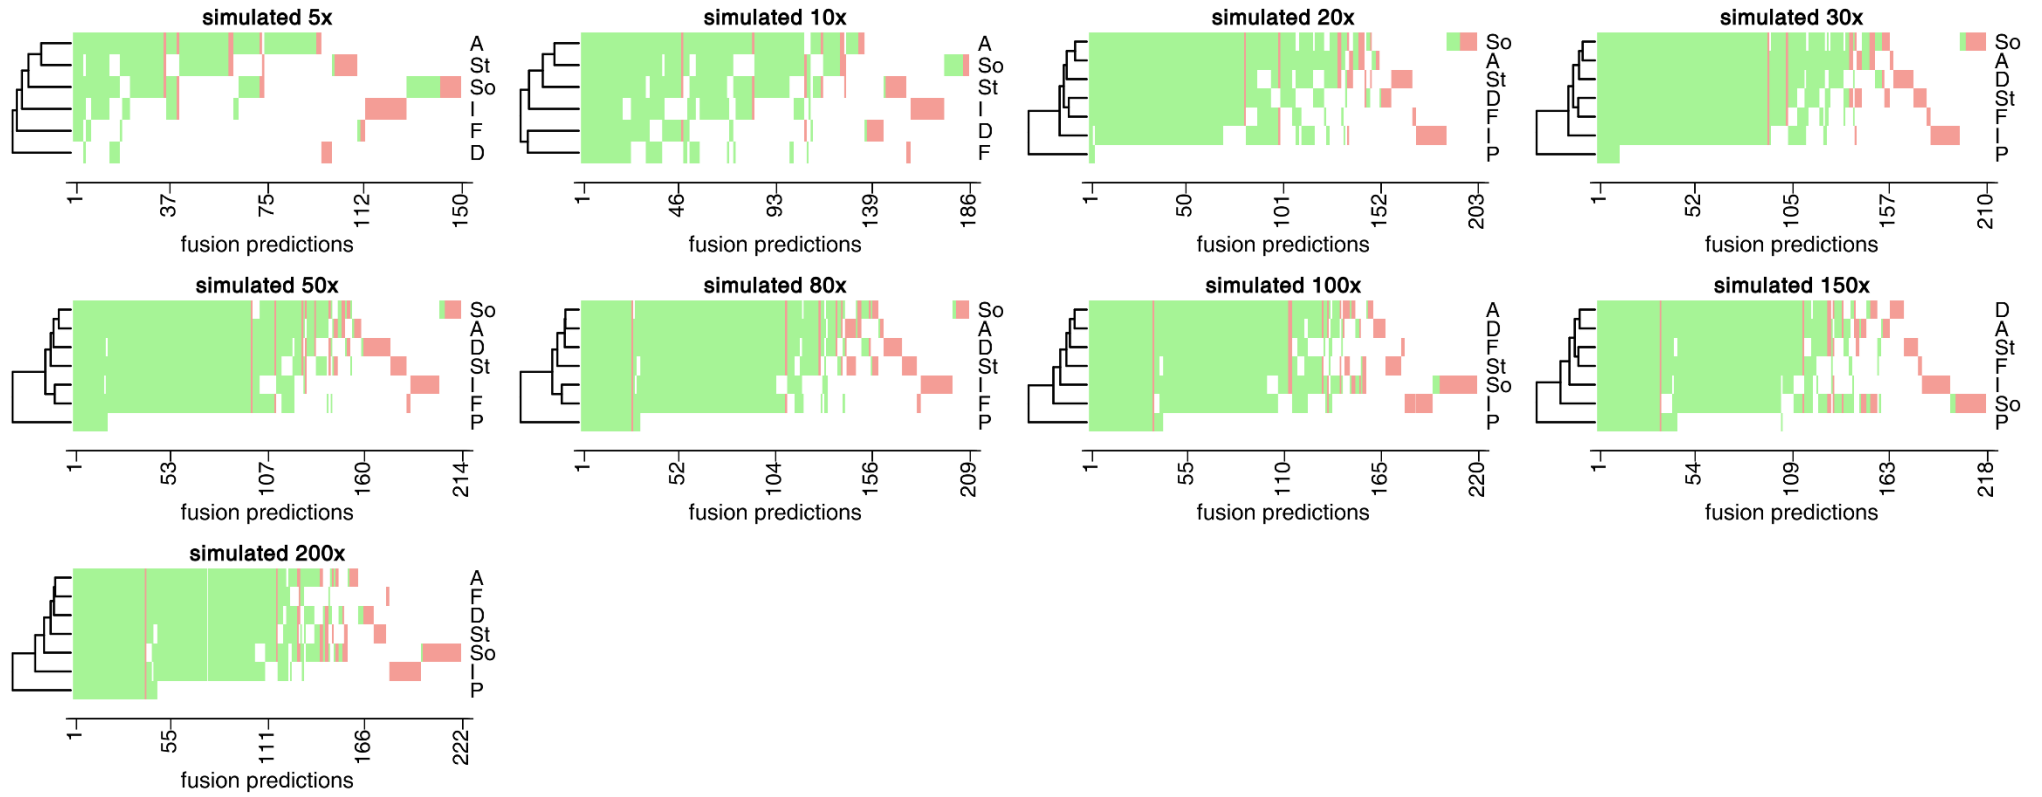

**B**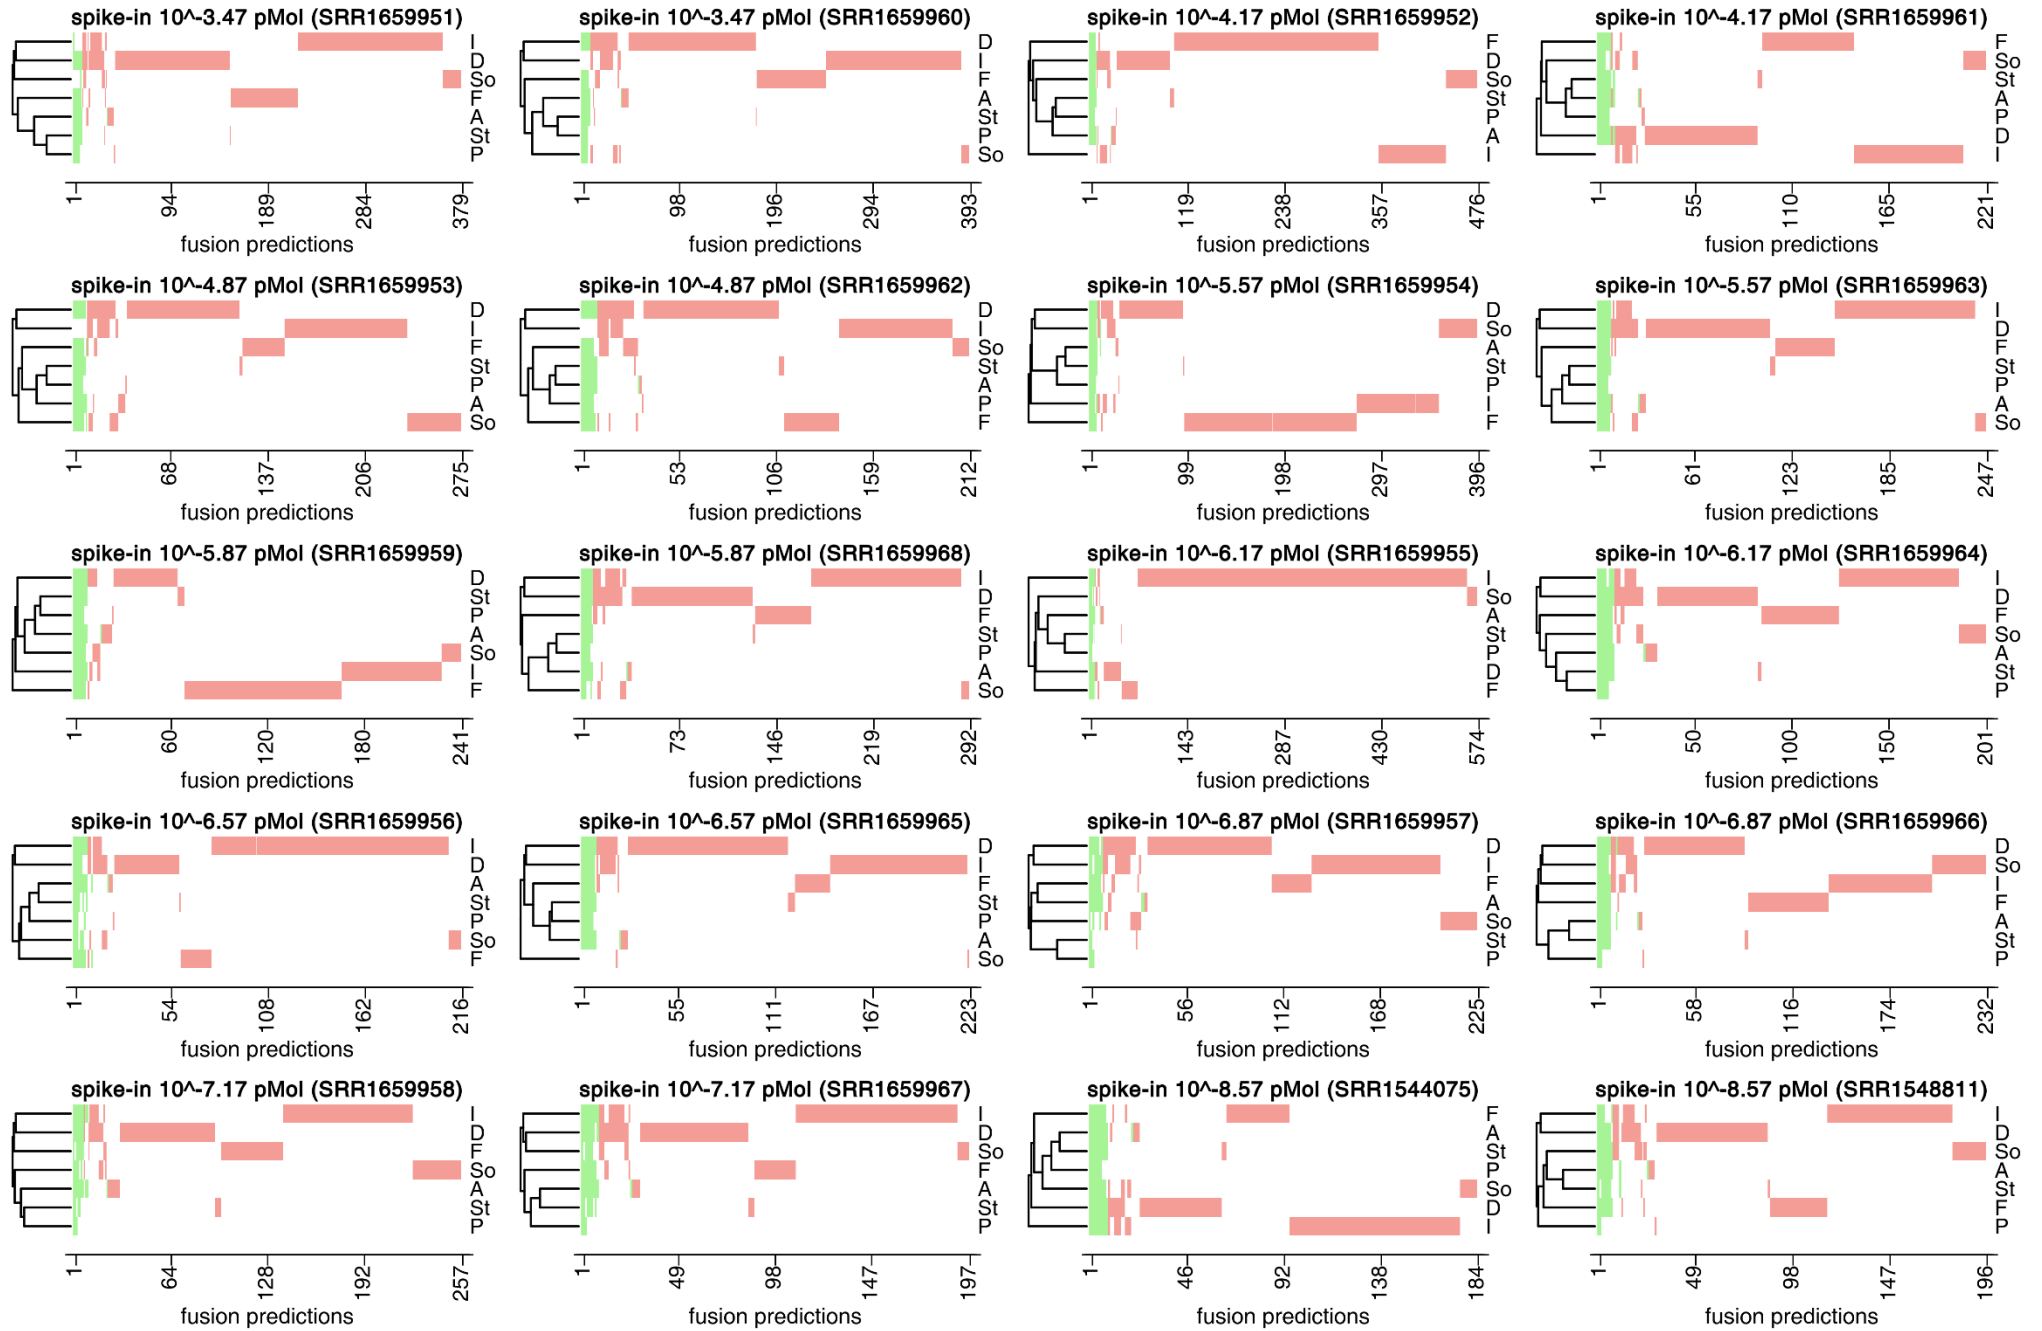

**C**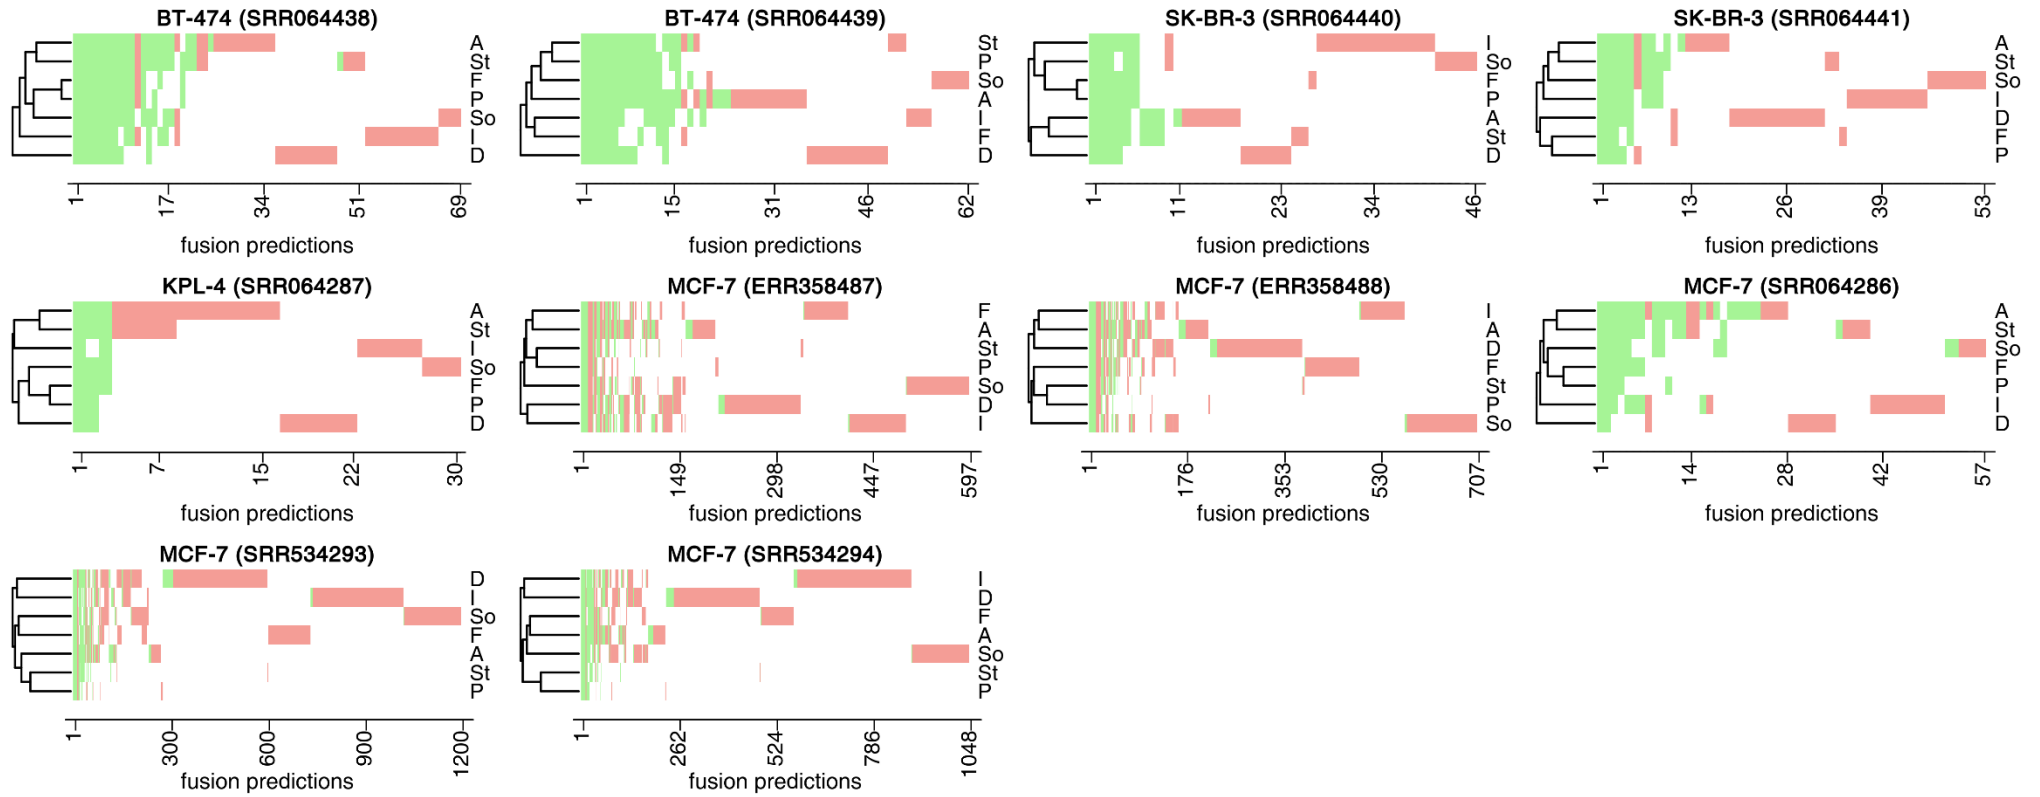

**Supplemental Figure S2: Fusion predictions shared between the methods.**

The fusion predictions are sorted in descending order from left to right by the number of methods that reported them. True positives are shown in green; false positives (simulated dataset) or non-validated predictions (spike-in and cell line datasets) are shown in red. Only gene-to-gene fusions were considered. A, Arriba; D, deFuse; F, FusionCatcher; I, InFusion; P, PRADA; So, SOAPfuse; St, STAR-Fusion. (A) Simulated data. (B) Spike-ins of synthetic fusions. (C) Cell lines.
