# Supplementary material for: Accurate and efficient detection of gene fusions from RNA sequencing data
Source: PubMed Central journal article supplement (PMC7919457; doi:10.1101/gr.257246.119), 2021-03
Supplement: supp_gr.257246.119_Supplemental_Figure_S4.pdf [file supp_gr.257246.119_Supplemental_Figure_S4.pdf]

**A**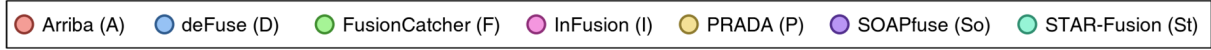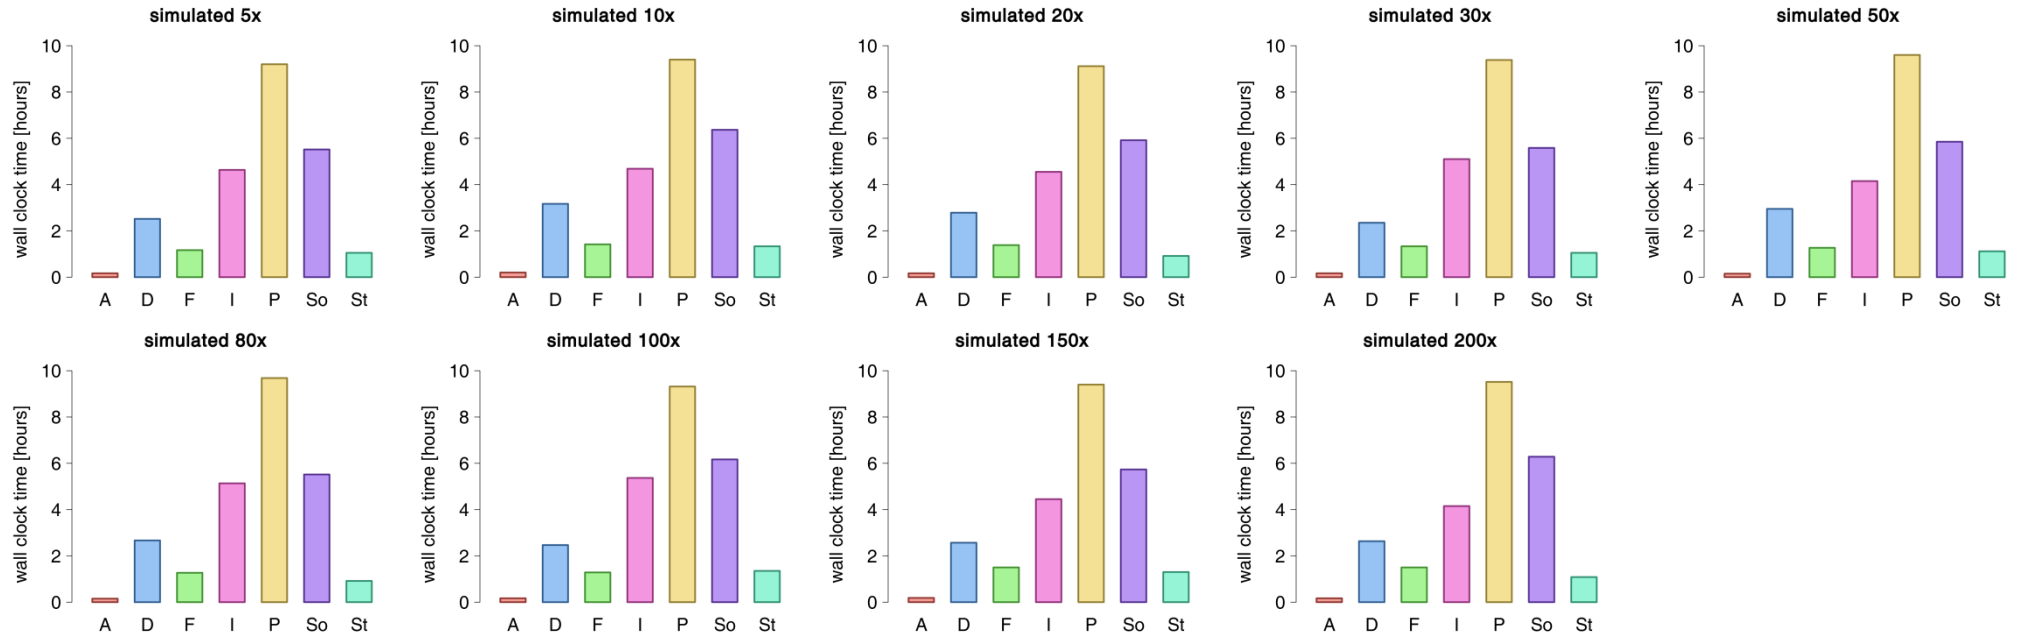

**B**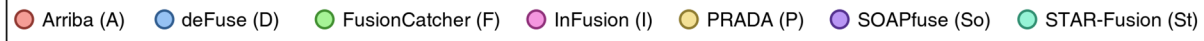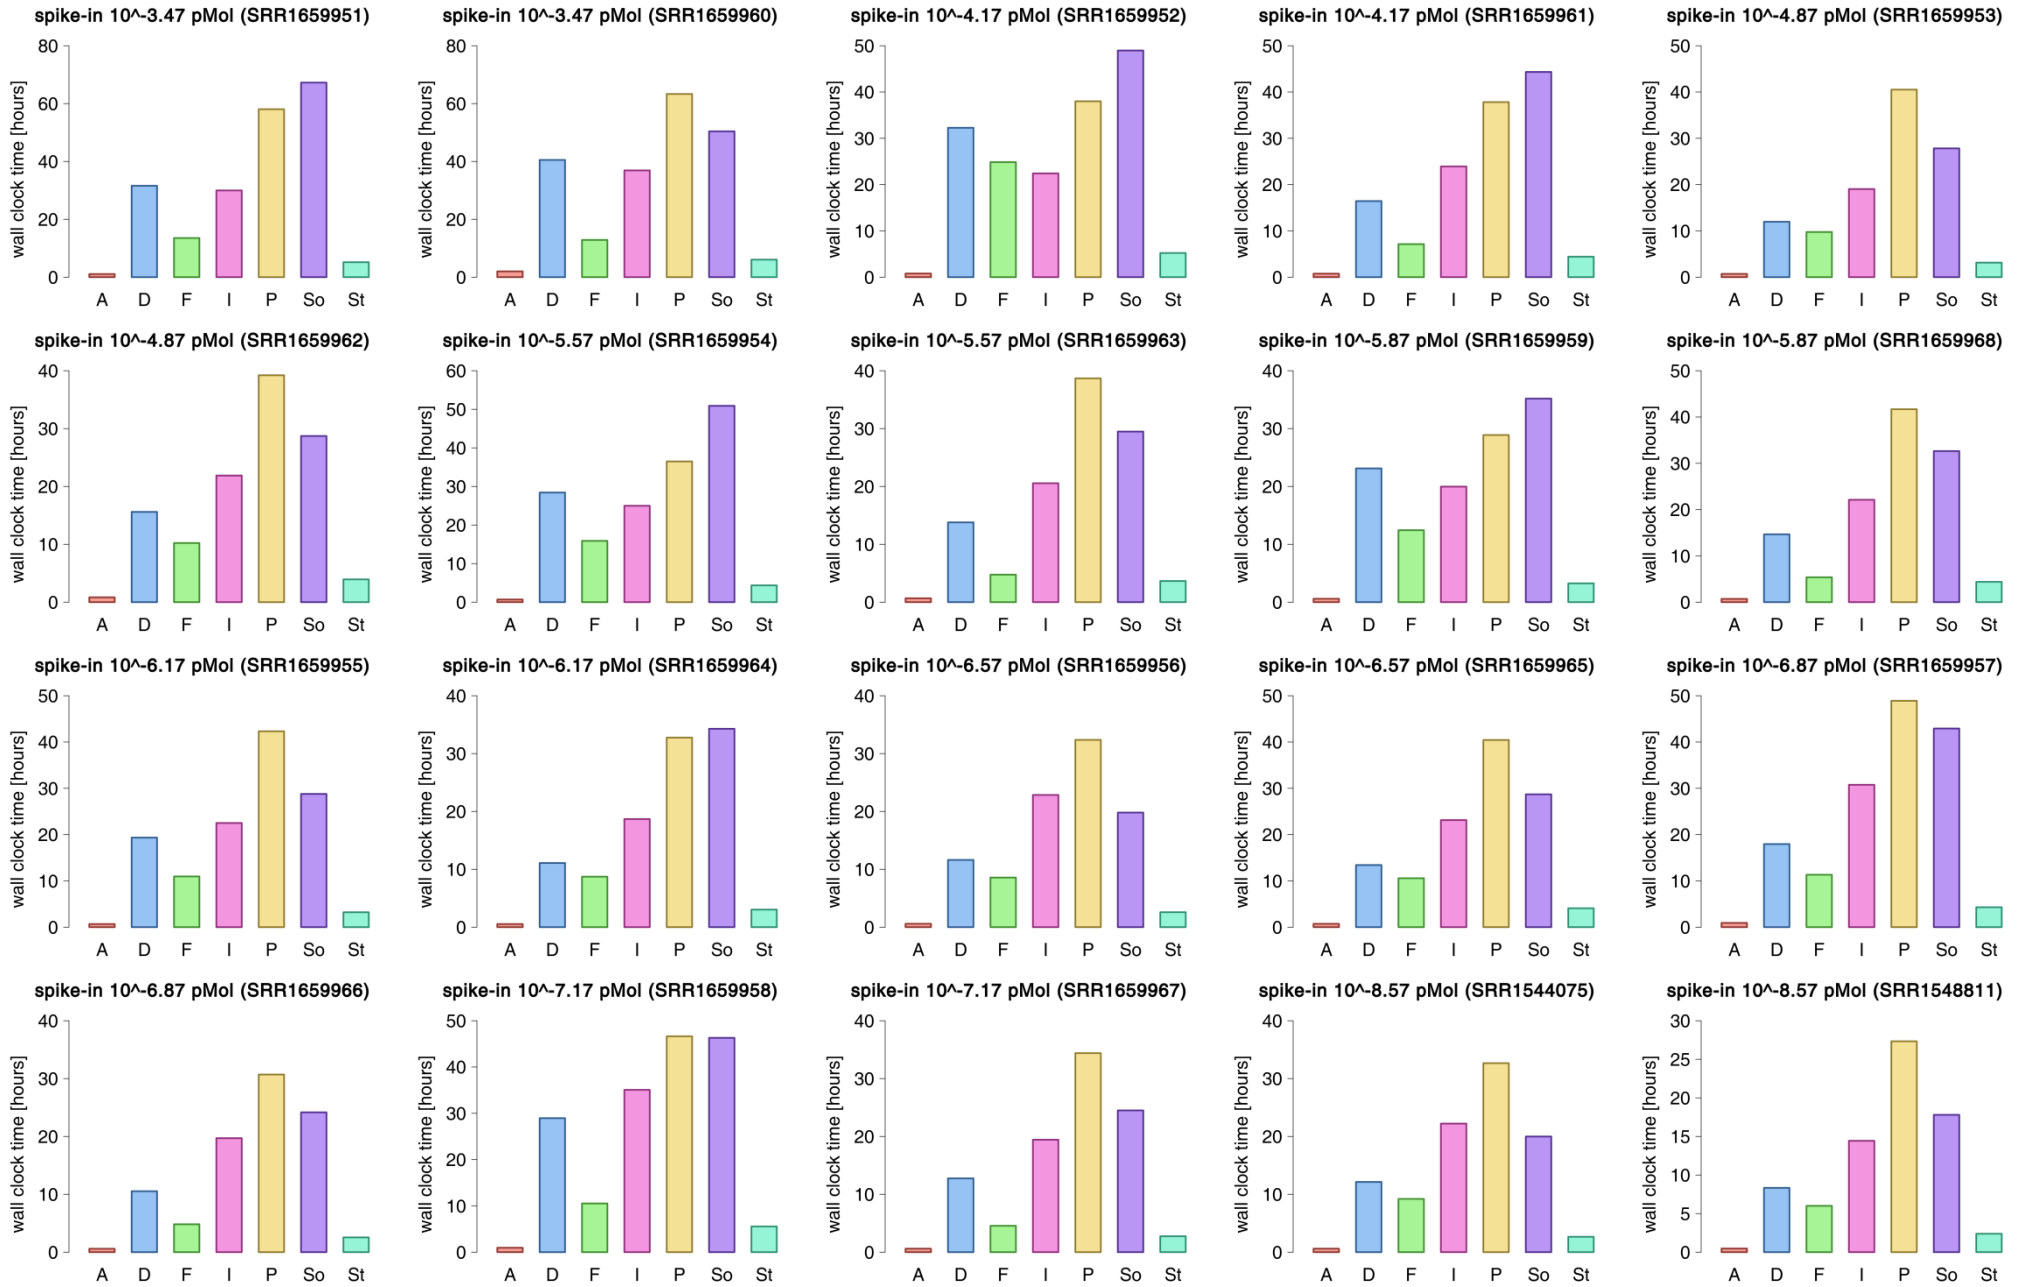

C

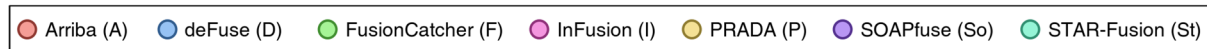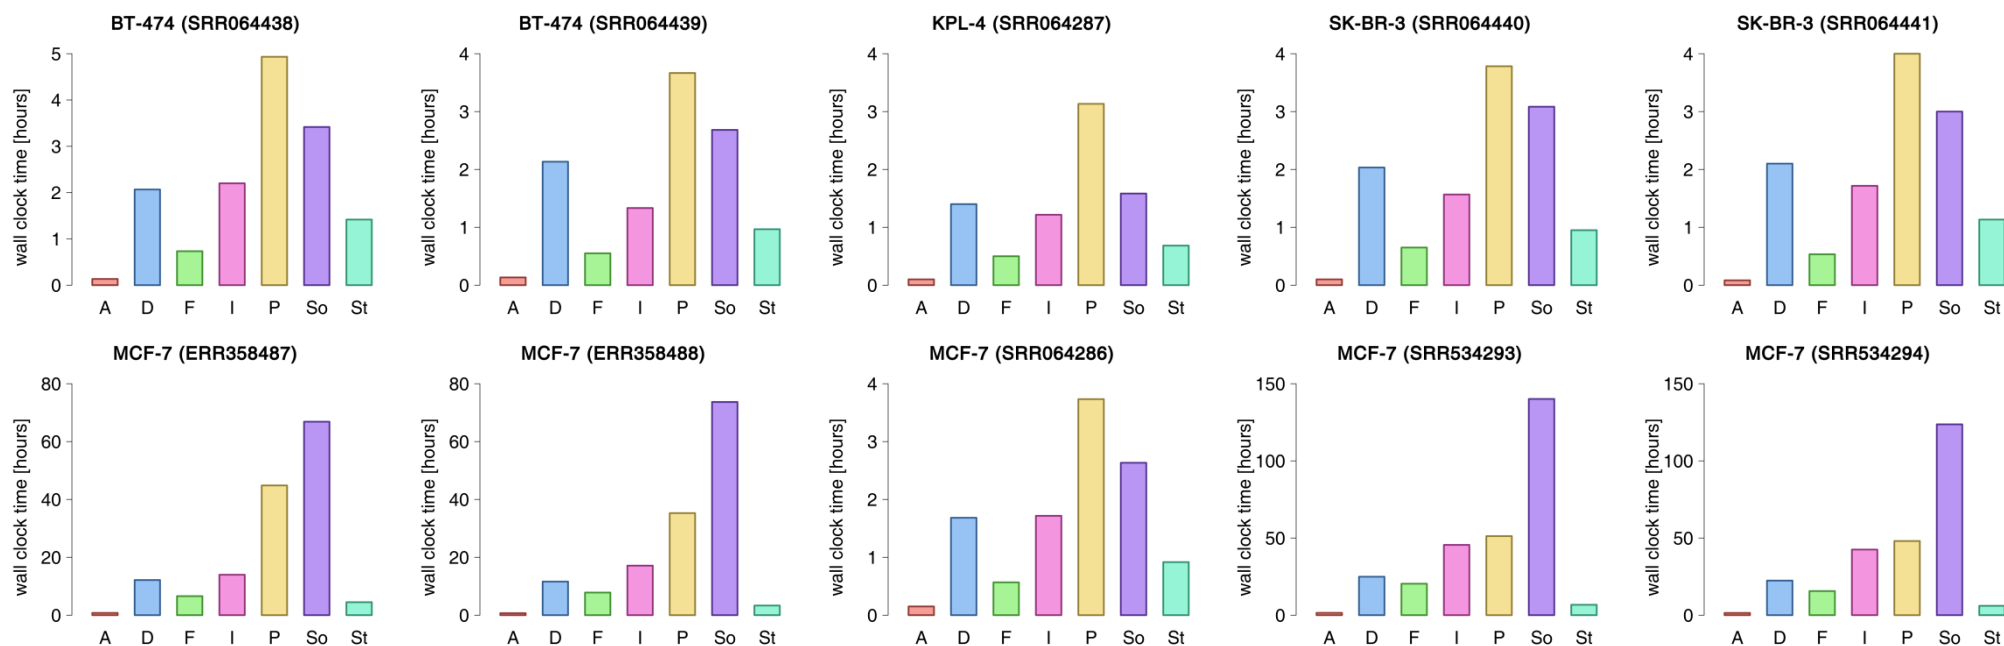

### Supplemental Figure S4: Wall clock (elapsed) time of all tools on all benchmark datasets.

The wall clock time was measured using the GNU *time* utility. (A) Simulated data. (B) Spike-ins of synthetic fusions. (C) Cell lines.
