# Supplementary material for: Accurate and efficient detection of gene fusions from RNA sequencing data
Source: PubMed Central journal article supplement (PMC7919457; doi:10.1101/gr.257246.119), 2021-03
Supplement: supp_gr.257246.119_Supplemental_Figure_S5.pdf [file supp_gr.257246.119_Supplemental_Figure_S5.pdf]

**A**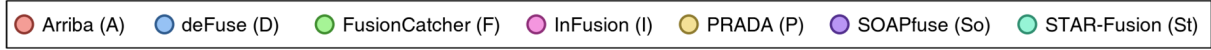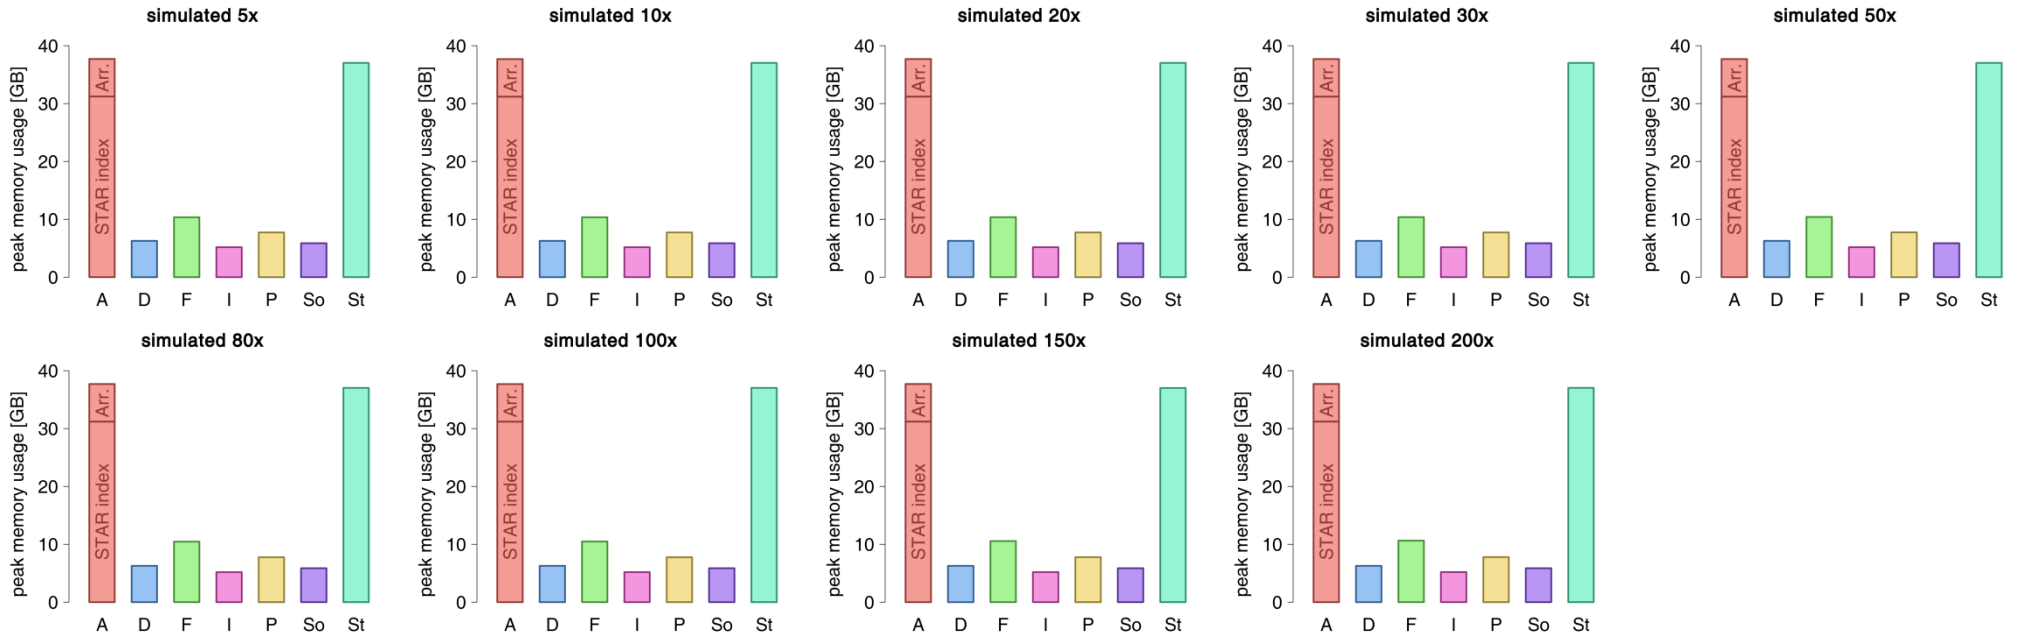

**B**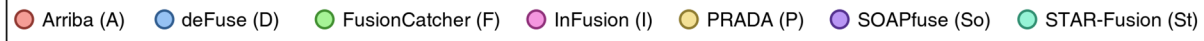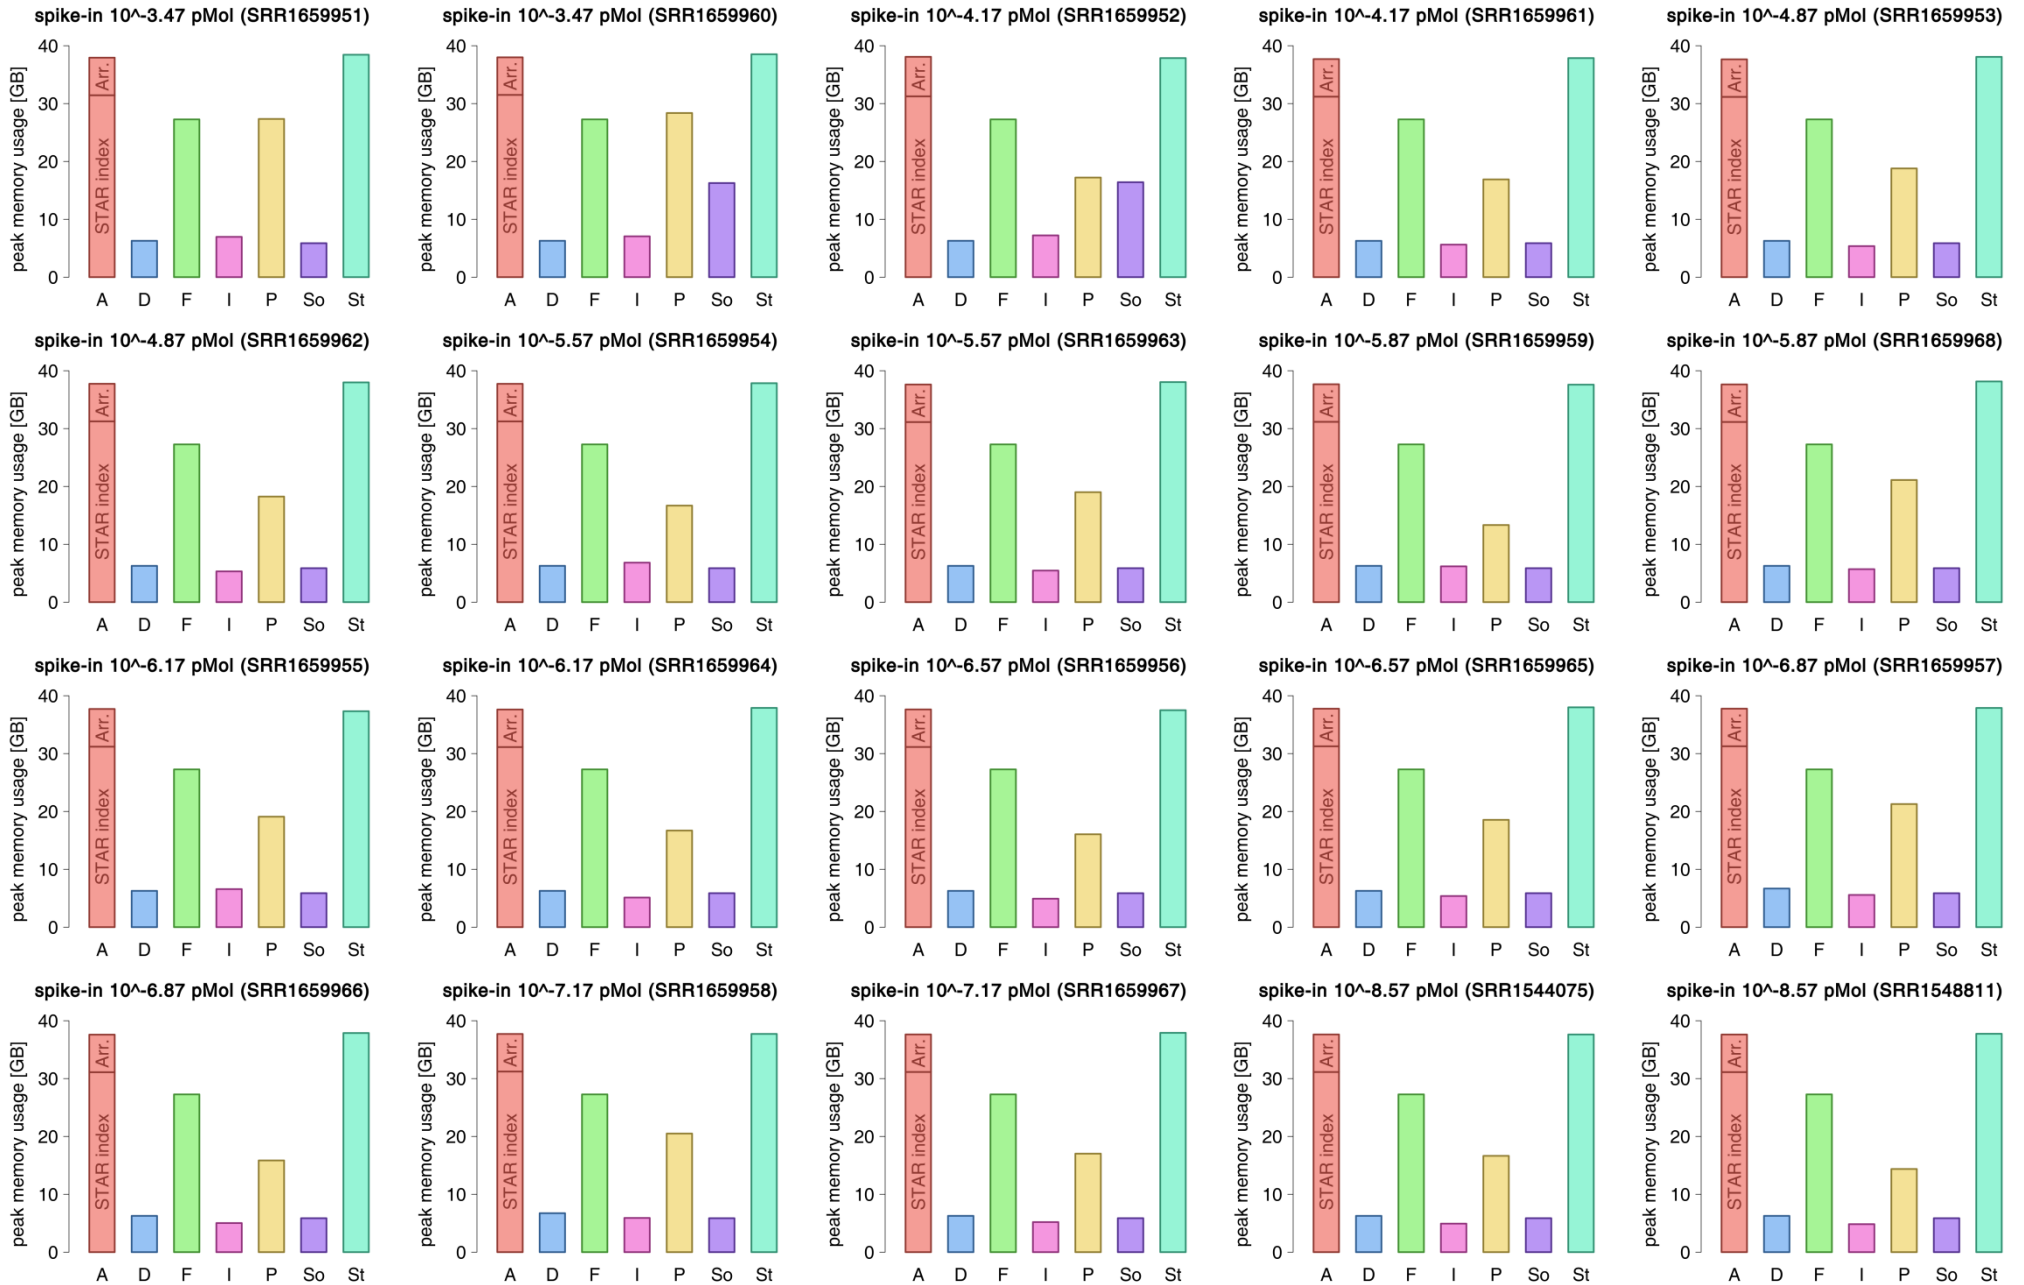

C

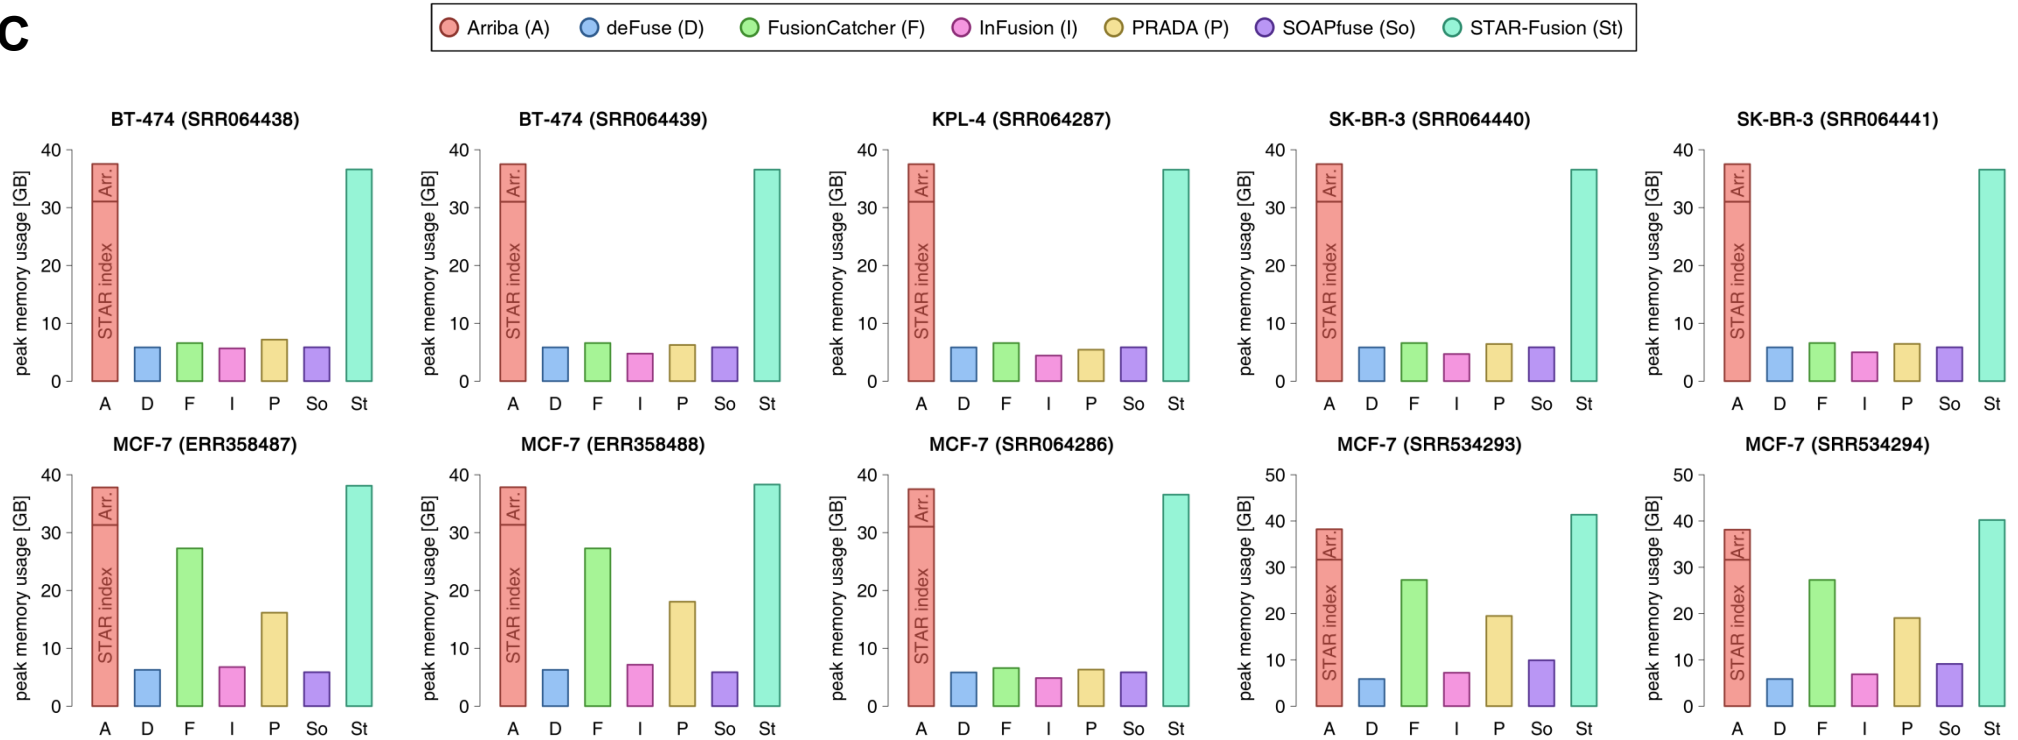

### Supplemental Figure S5: Peak memory usage of all tools on all benchmark datasets.

The memory usage was measured using the GNU *time* utility. The STAR index accounted for approx. 31 GB of the memory consumption of Arriba's workflow. Arriba itself (Arr.) consumed approx. 7 GB. (A) Simulated data. (B) Spike-ins of synthetic fusions. (C) Cell lines.
