# Supplementary material for: Accurate and efficient detection of gene fusions from RNA sequencing data
Source: PubMed Central journal article supplement (PMC7919457; doi:10.1101/gr.257246.119), 2021-03
Supplement: supp_gr.257246.119_Supplemental_Figure_S6.pdf [file supp_gr.257246.119_Supplemental_Figure_S6.pdf]

# CFPAC-1 (9fc5da43-4f04-4bdc-a5bb-59a1ec219926)

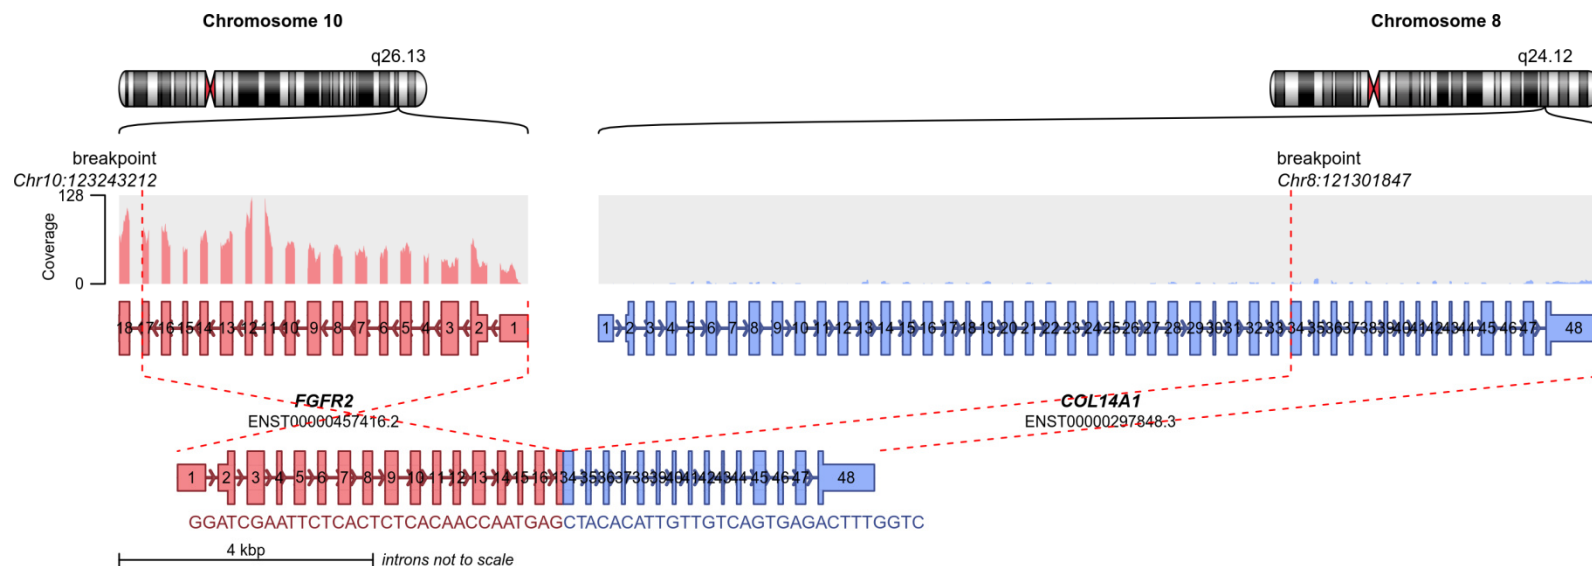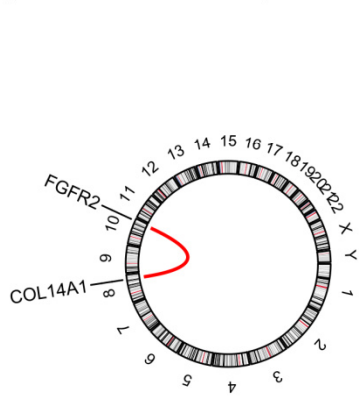

## RETAINED PROTEIN DOMAINS

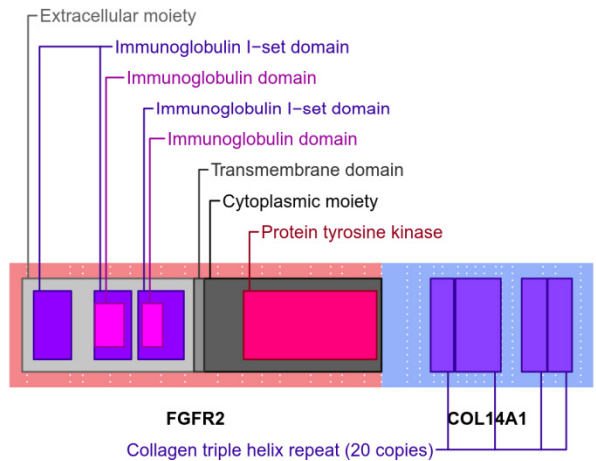

## SUPPORTING READ COUNT

Split reads in *FGFR2* = 0  
 Split reads in *COL14A1* = 2  
 Discordant mates = 1

# HPAC (59b5010b-df6b-4d72-9538-350c4cd6062a)

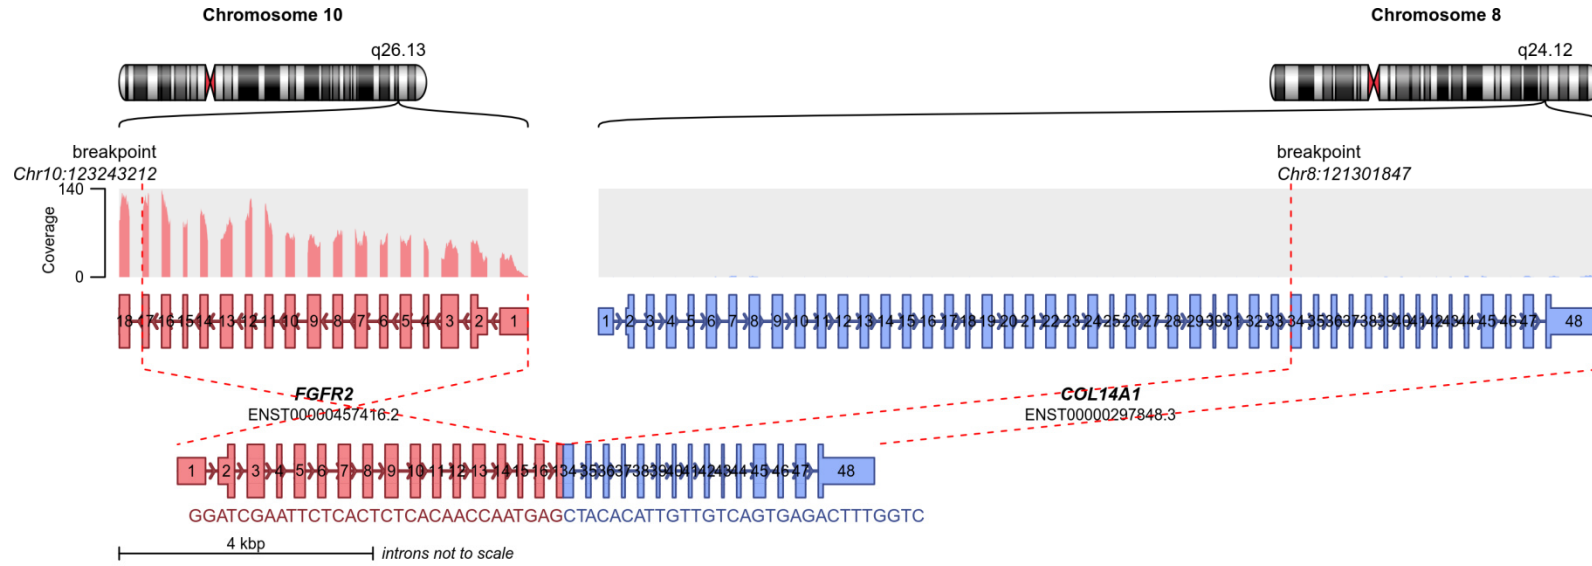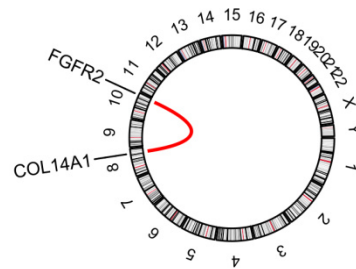

## RETAINED PROTEIN DOMAINS

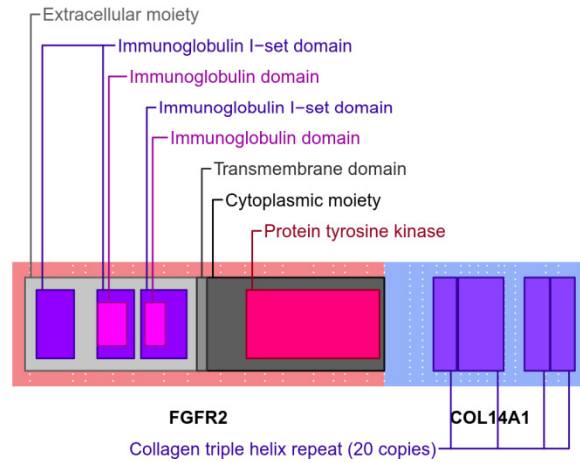

## SUPPORTING READ COUNT

Split reads in *FGFR2* = 2

Split reads in *COL14A1* = 0

Discordant mates = 1

# SNU-324 (13924031-19ce-4fcb-b023-5b2e3aefdf77)

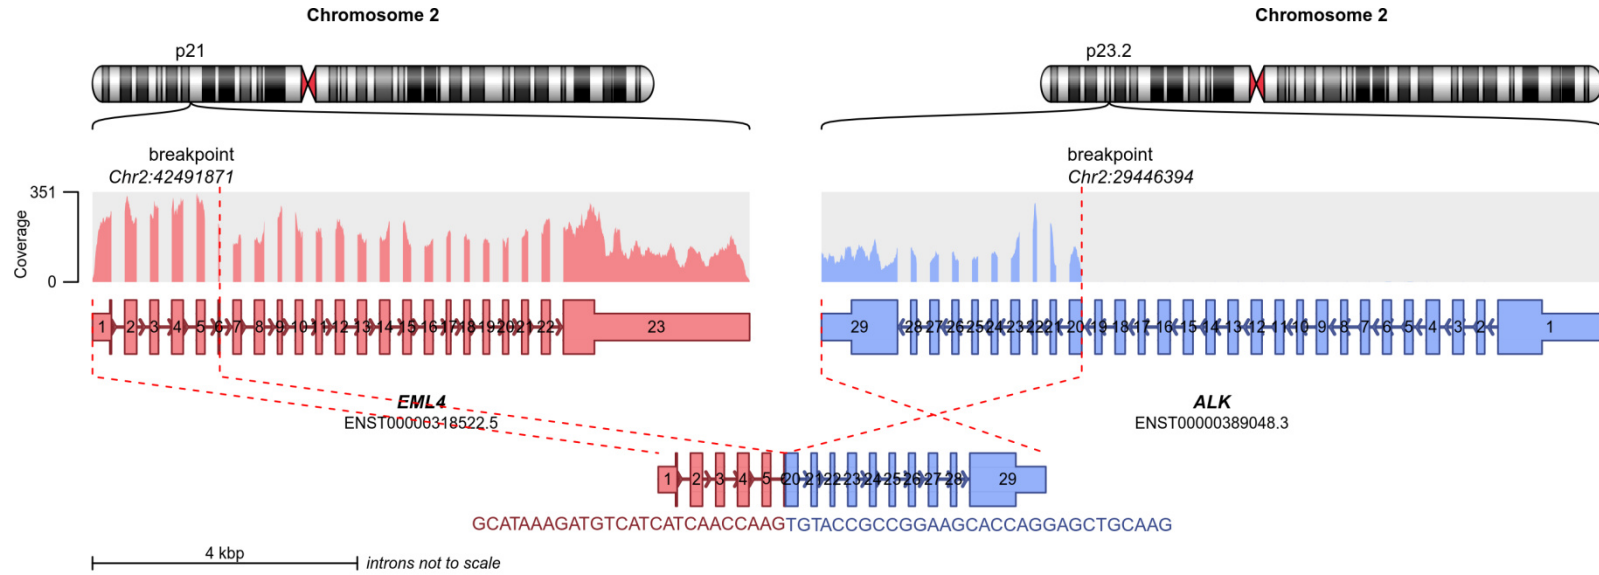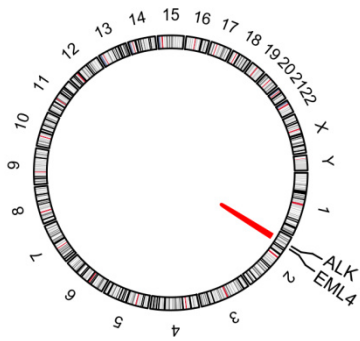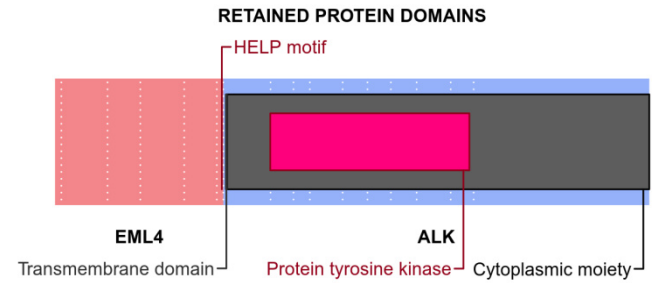

## SUPPORTING READ COUNT

- Split reads in *EML4* = 8
- Split reads in *ALK* = 12
- Discordant mates = 24

**COMP-002 (EGAF00001725478, EGAF00001745325, EGAF00001745326)**

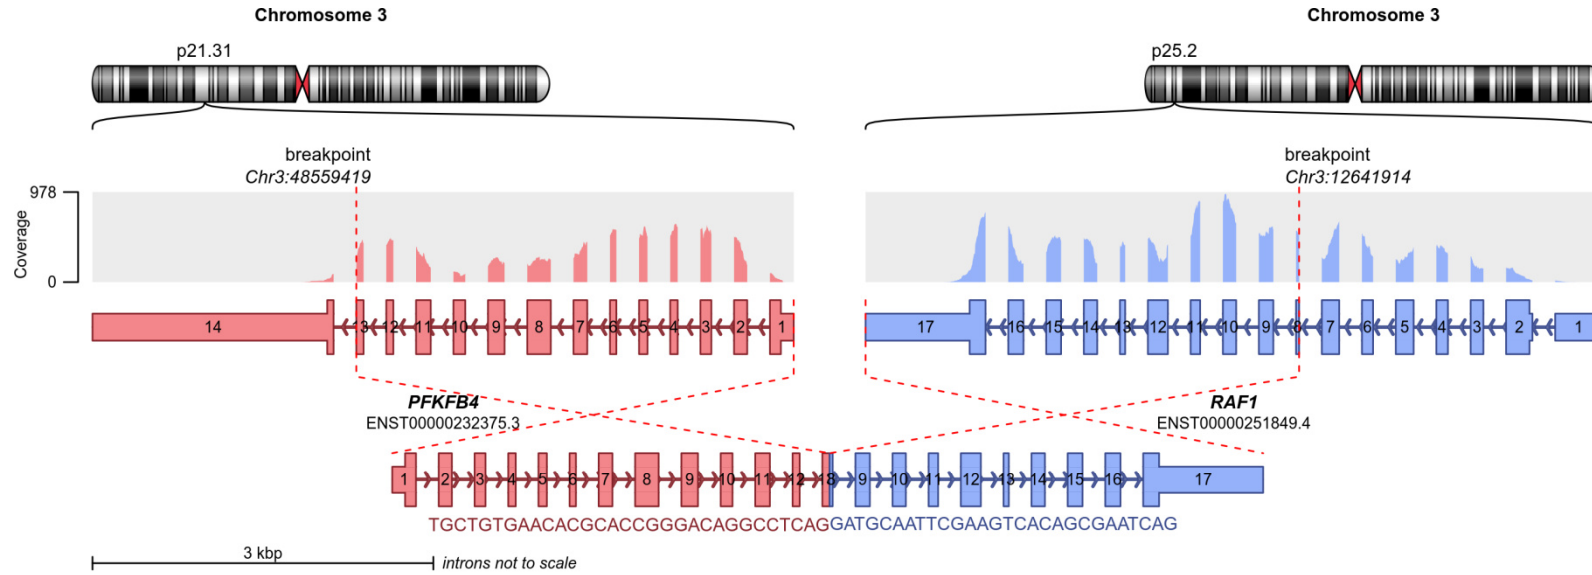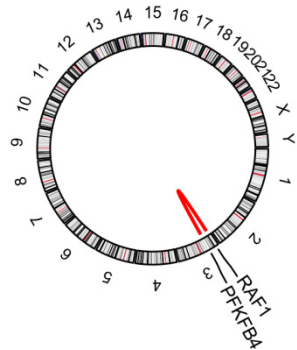

**RETAINED PROTEIN DOMAINS**

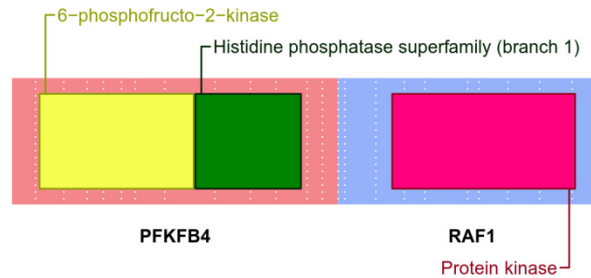

**SUPPORTING READ COUNT**

Split reads in *PFKFB4* = 17  
 Split reads in *RAF1* = 19  
 Discordant mates = 2



**COMP-0023 (EGAF00001725495, EGAF00001745371, EGAF00001745372)**

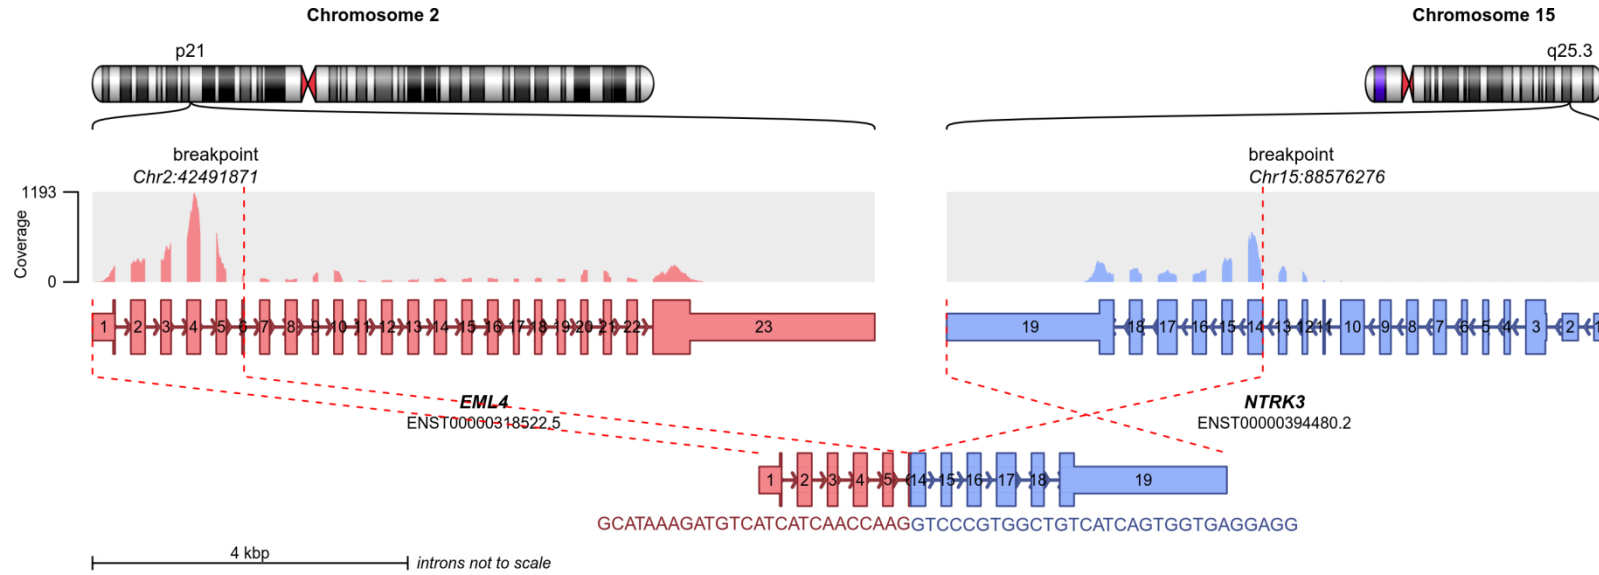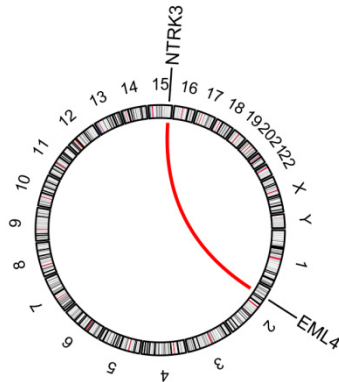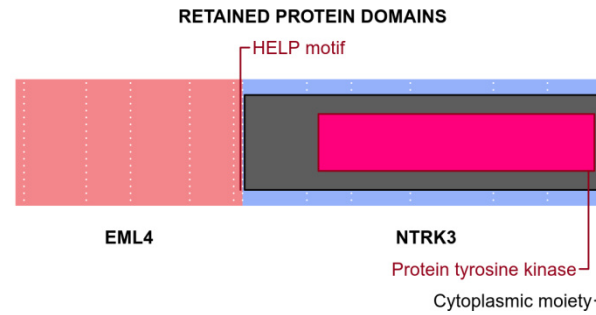

**SUPPORTING READ COUNT**  
Split reads in *EML4* = 3  
Split reads in *NTRK3* = 13  
Discordant mates = 2

**COMP-0028 (EGAF00001725498, EGAF00001745377, EGAF00001745378)**

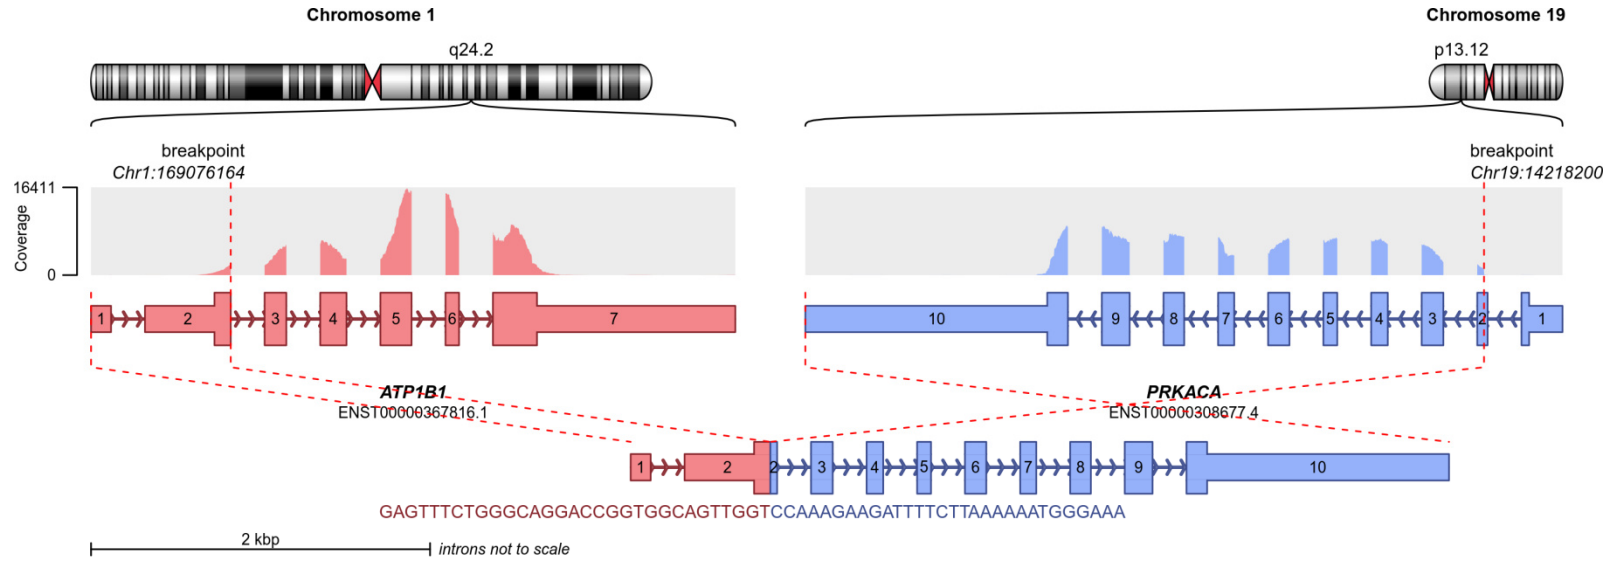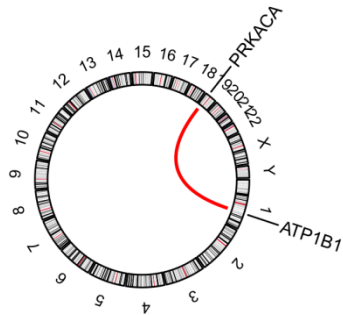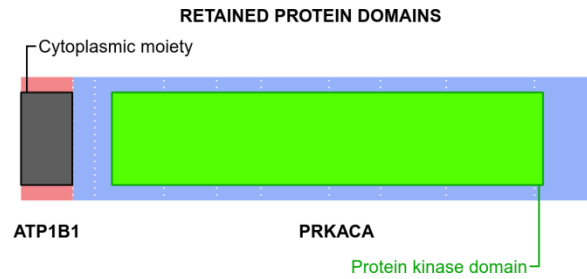

**SUPPORTING READ COUNT**

Split reads in *ATP1B1* = 15

Split reads in *PRKACA* = 150

Discordant mates = 22

**COMP-0055 (EGAF00001725520, EGAF00001745345, EGAF00001745346)**

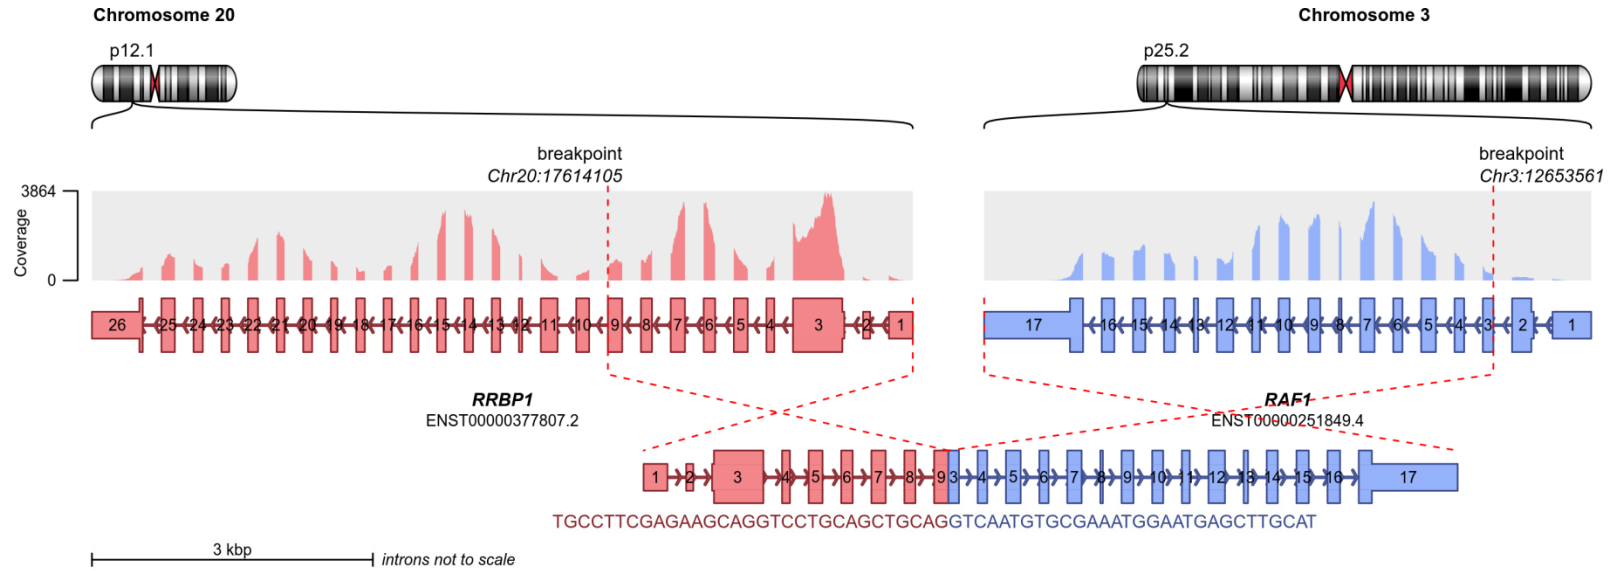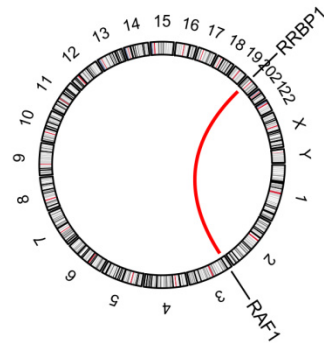

**RETAINED PROTEIN DOMAINS**

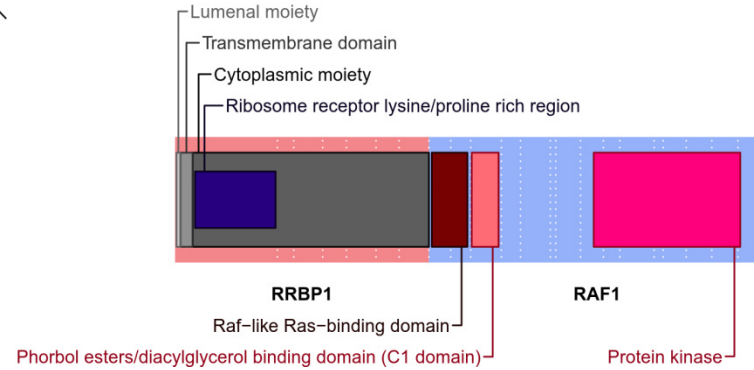

**SUPPORTING READ COUNT**

Split reads in *RRBP1* = 52  
 Split reads in *RAF1* = 46  
 Discordant mates = 28

# T\_05\_08\_A230b (SRR3308904)

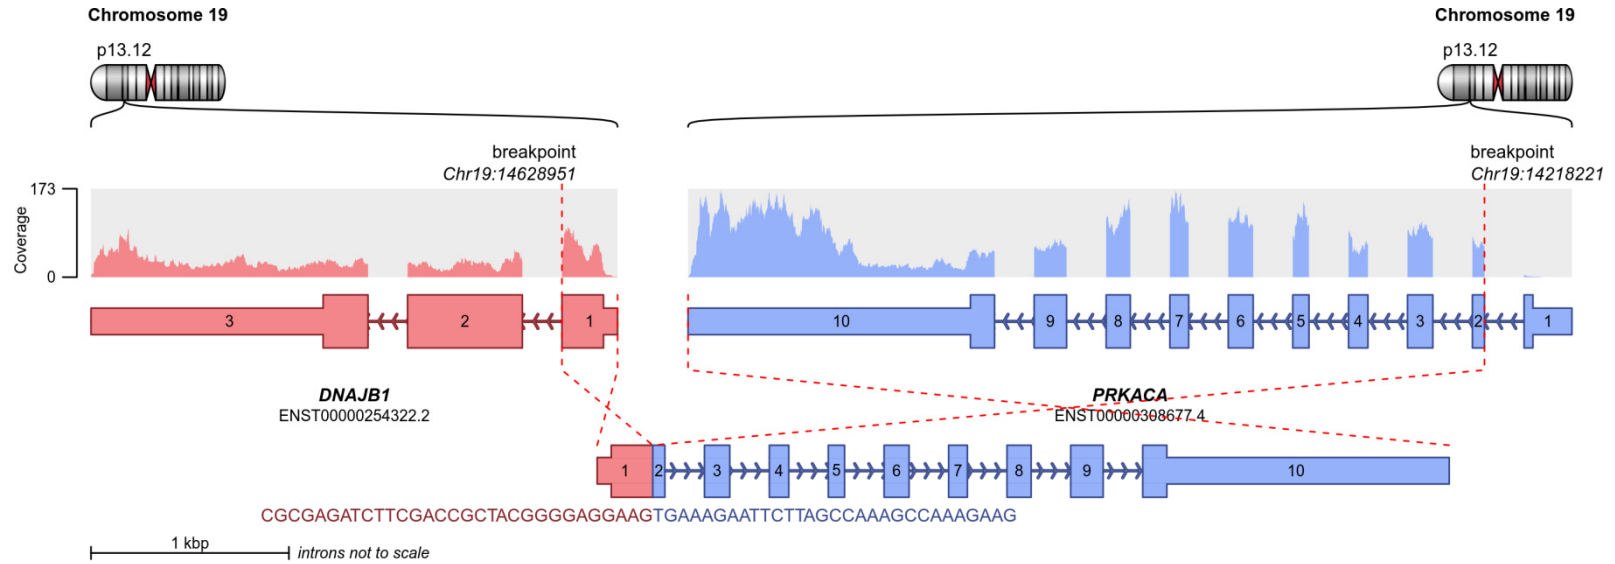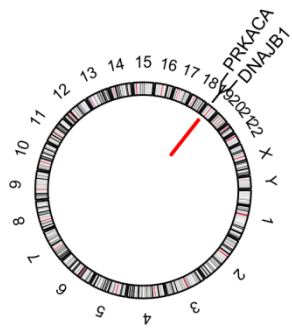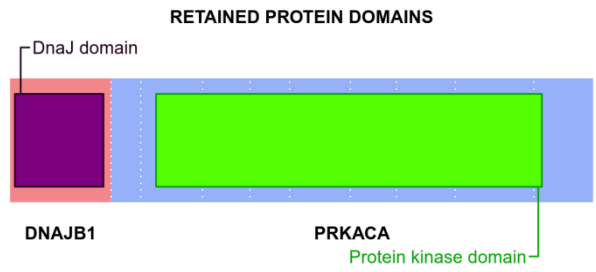

**SUPPORTING READ COUNT**

Split reads in *DNAJB1* = 3

Split reads in *PRKACA* = 9

Discordant mates = 73

# T\_07\_06\_A323a (SRR3308914)

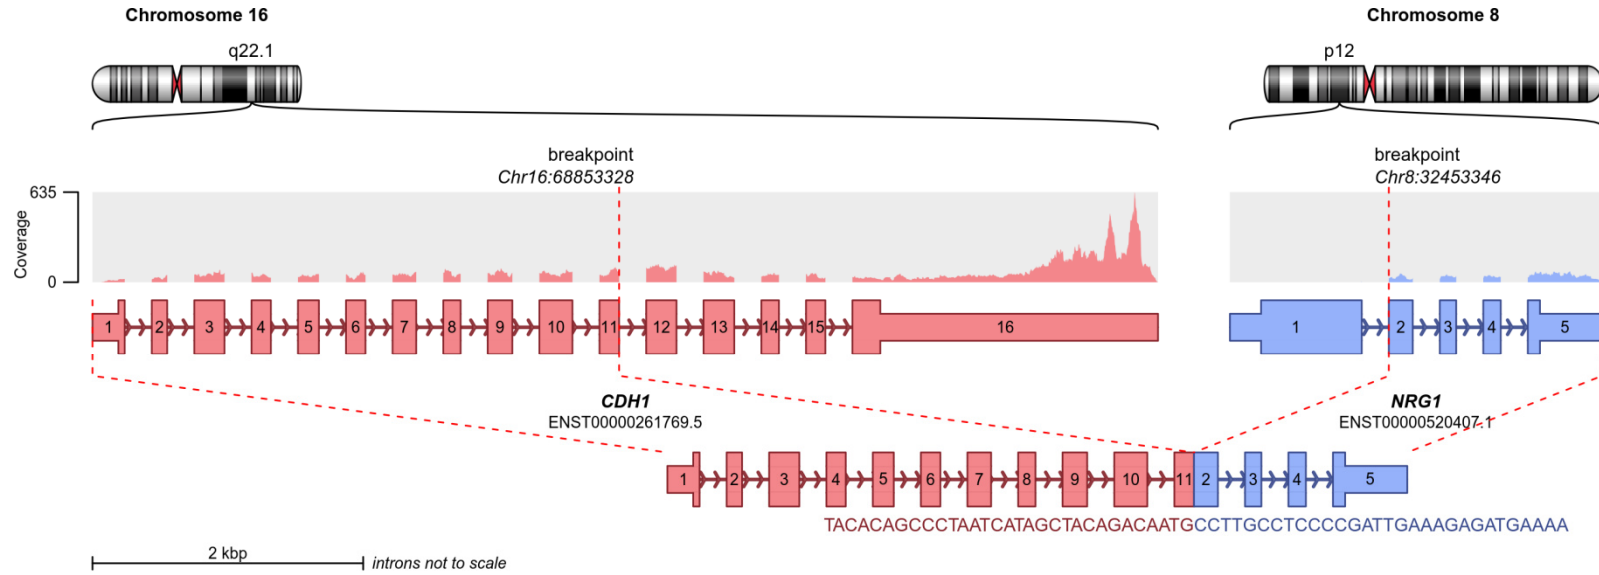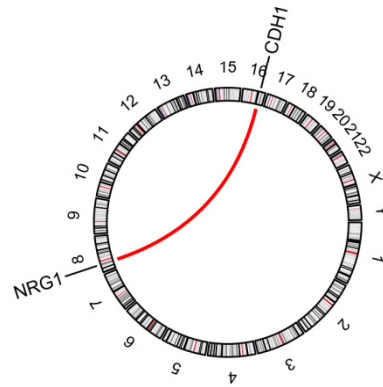

## RETAINED PROTEIN DOMAINS

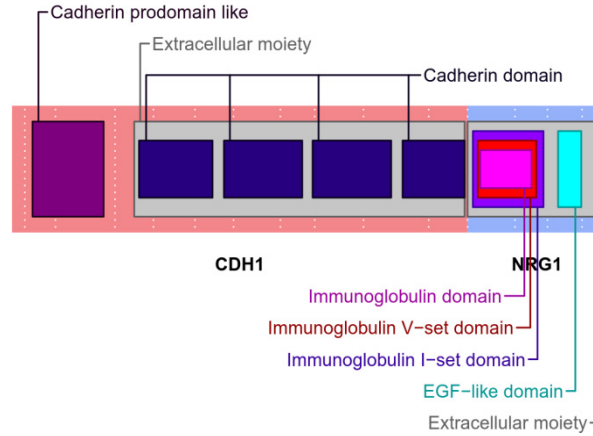

## SUPPORTING READ COUNT

Split reads in *CDH1* = 1  
 Split reads in *NRG1* = 12  
 Discordant mates = 32

# T\_07\_11\_A090a (SRR3308887)

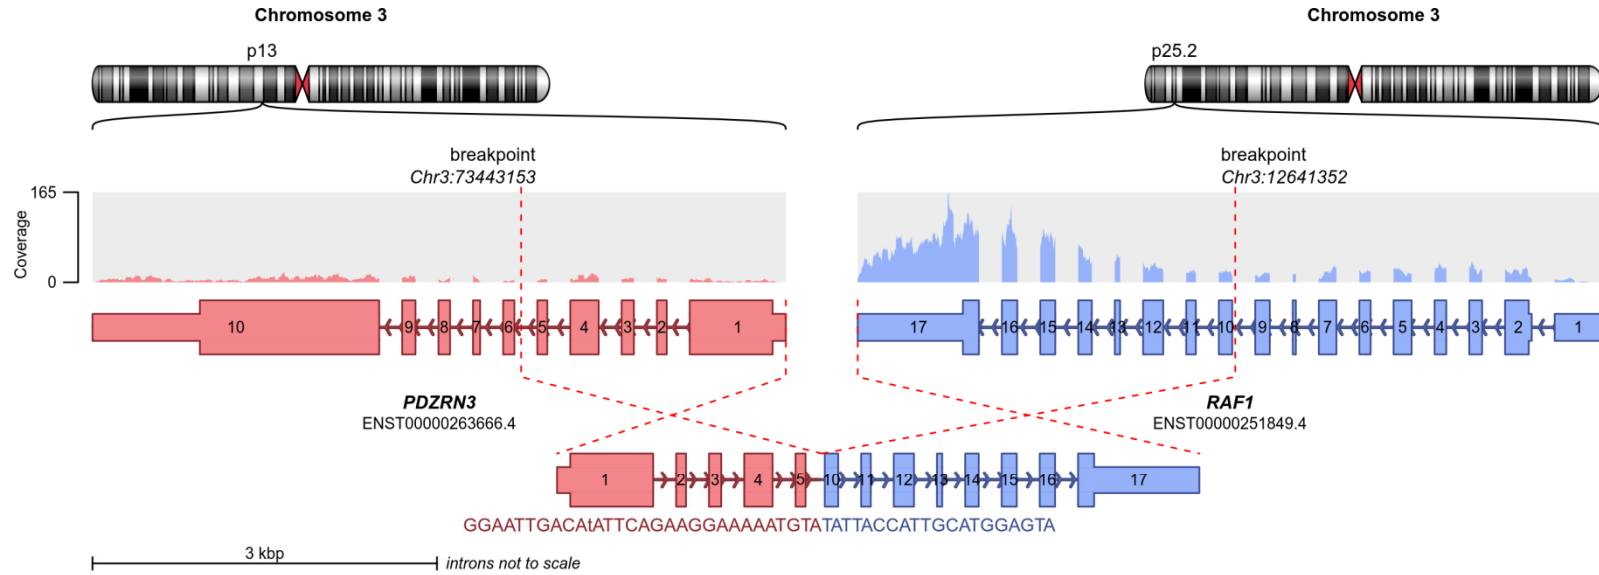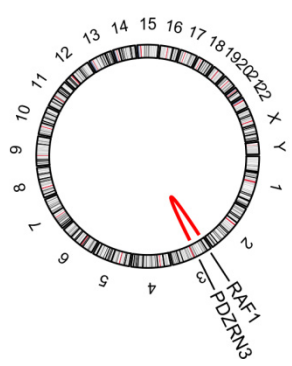

## RETAINED PROTEIN DOMAINS

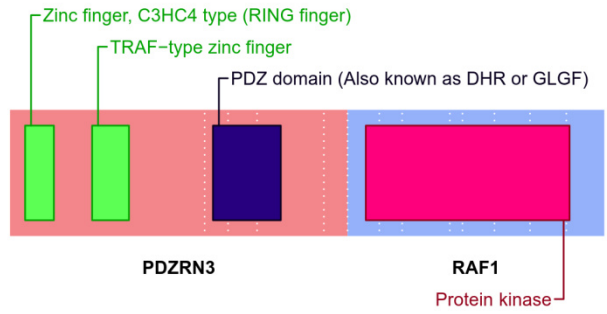

## SUPPORTING READ COUNT

Split reads in *PDZRN3* = 0  
 Split reads in *RAF1* = 1  
 Discordant mates = 5

# Patient 15 (EGAF00001984744)

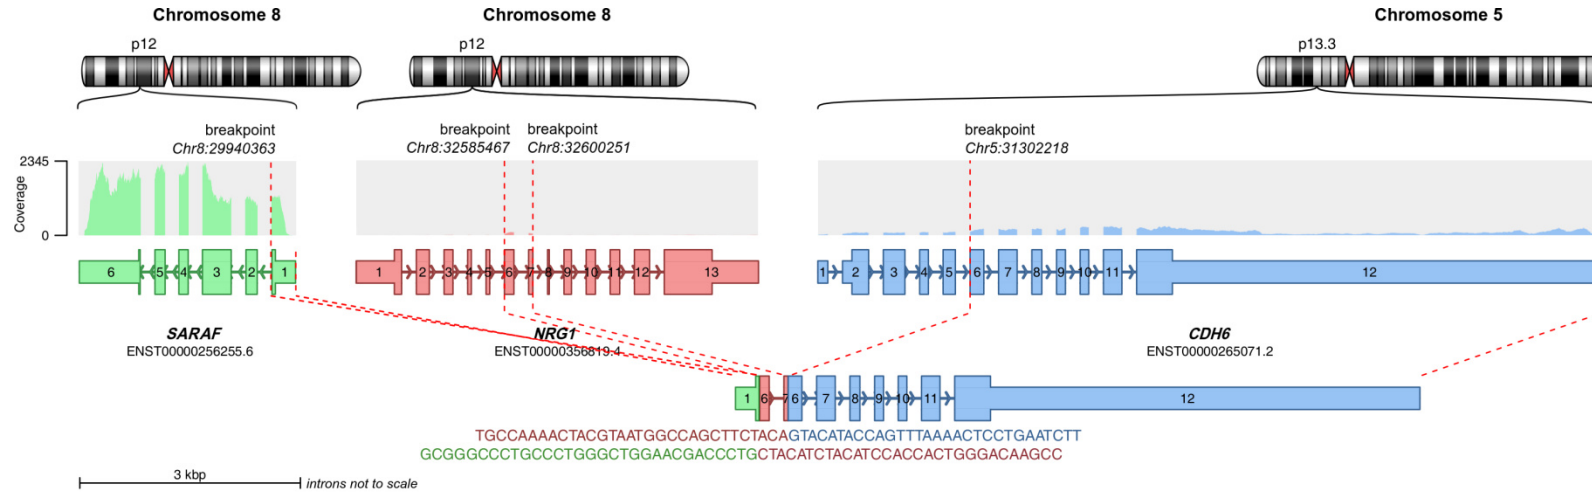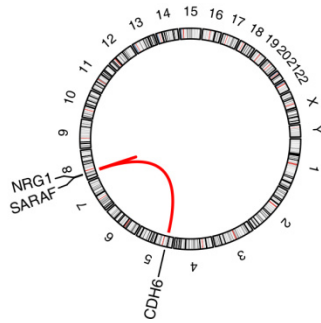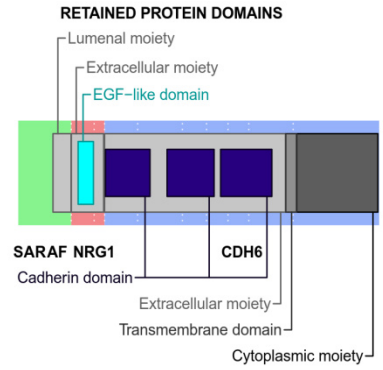

### SUPPORTING READ COUNT

Split reads in *SARAF* = 49  
 Split reads in *NRG1* = 14-15  
 Split reads in *CDH6* = 11  
 Discordant mates = 12-13



### Patient 14 (EGAF00001984739)

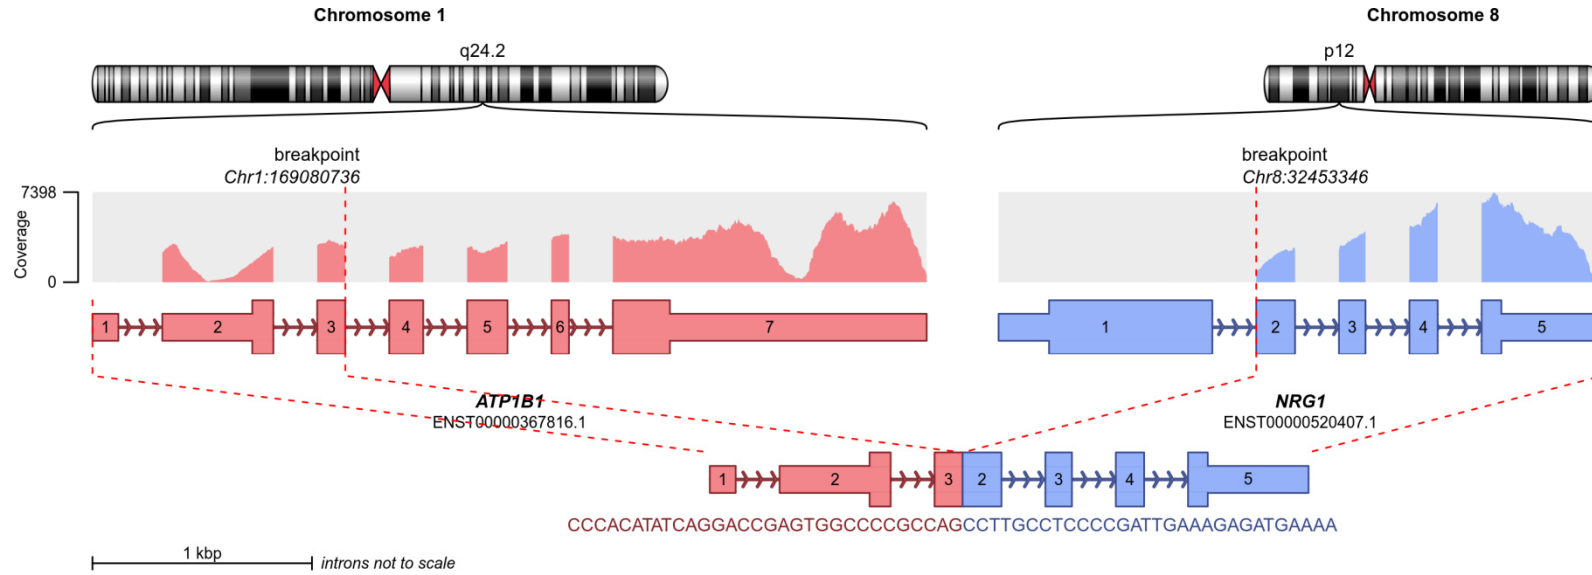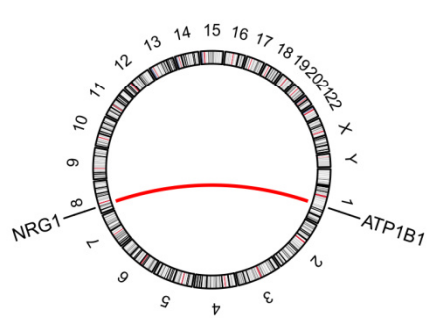

#### RETAINED PROTEIN DOMAINS

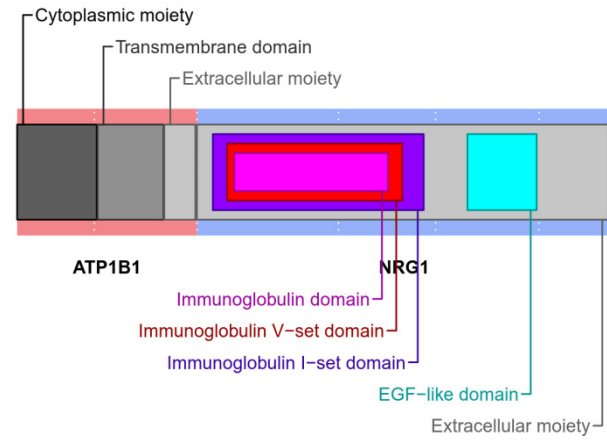

#### SUPPORTING READ COUNT

Split reads in *ATP1B1* = 160  
 Split reads in *NRG1* = 111  
 Discordant mates = 38

### Patient 17 (EGAF00001984730)

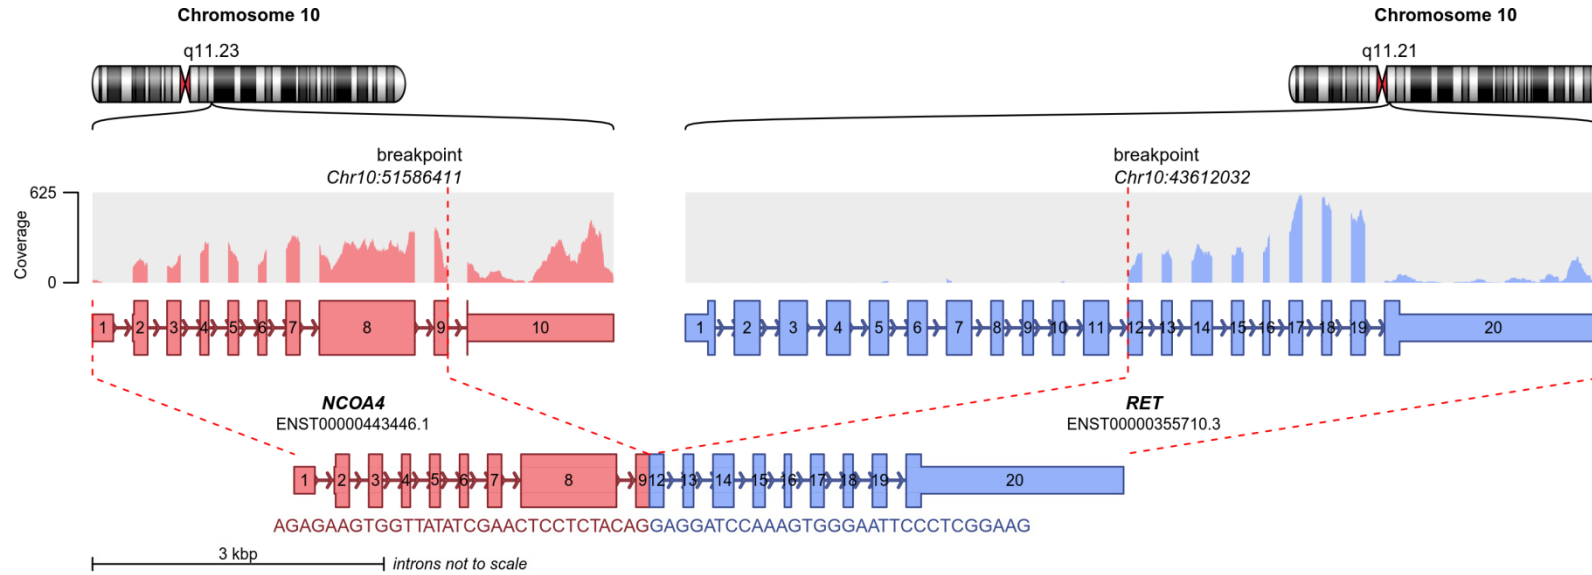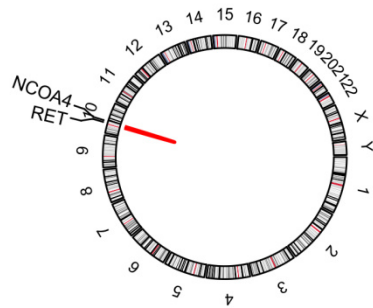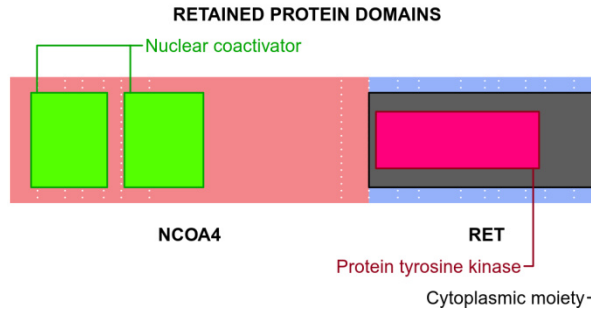

#### SUPPORTING READ COUNT

Split reads in *NCOA4* = 1  
 Split reads in *RET* = 0  
 Discordant mates = 1

# PDCM (EGAF00001984748)

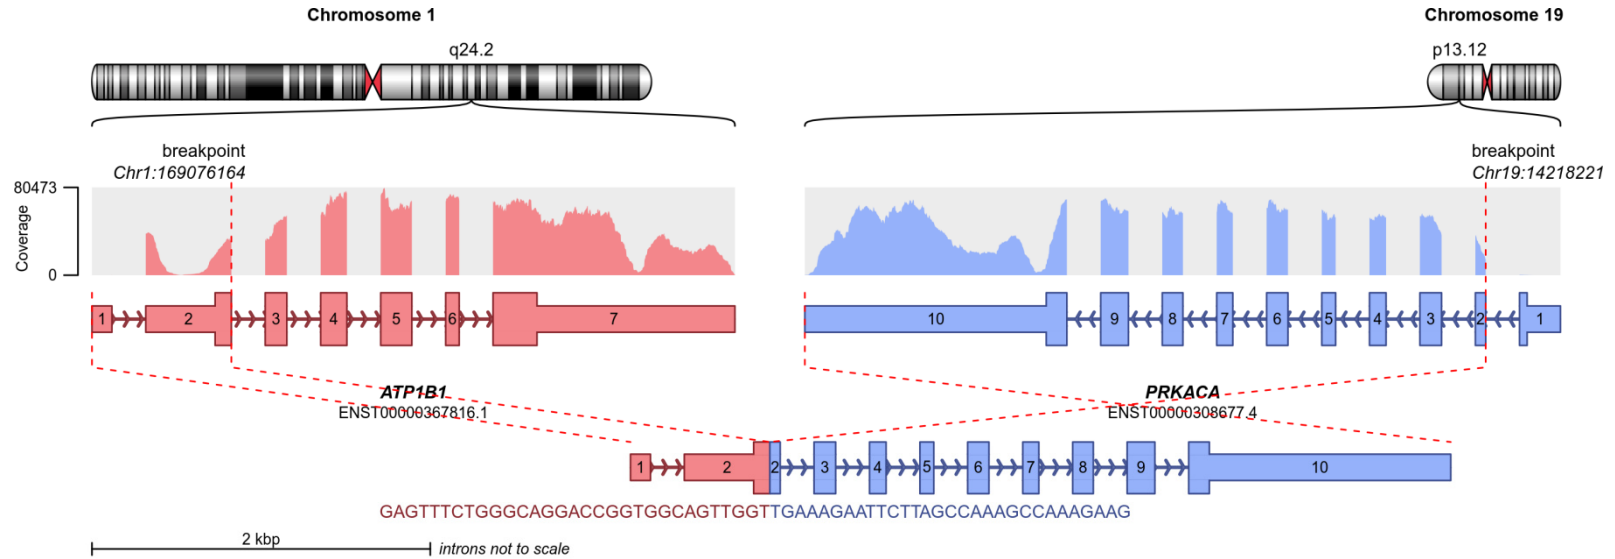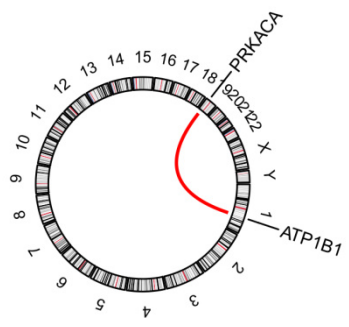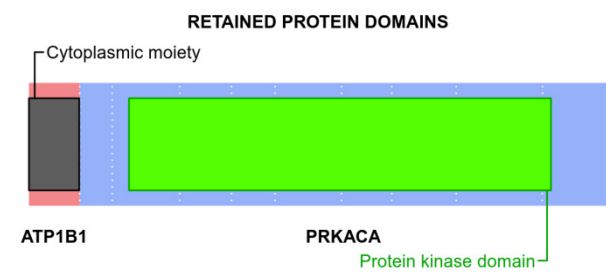

**SUPPORTING READ COUNT**

Split reads in *ATP1B1* = 110  
 Split reads in *PRKACA* = 303  
 Discordant mates = 65

# Patient A (EGAF00002486941)

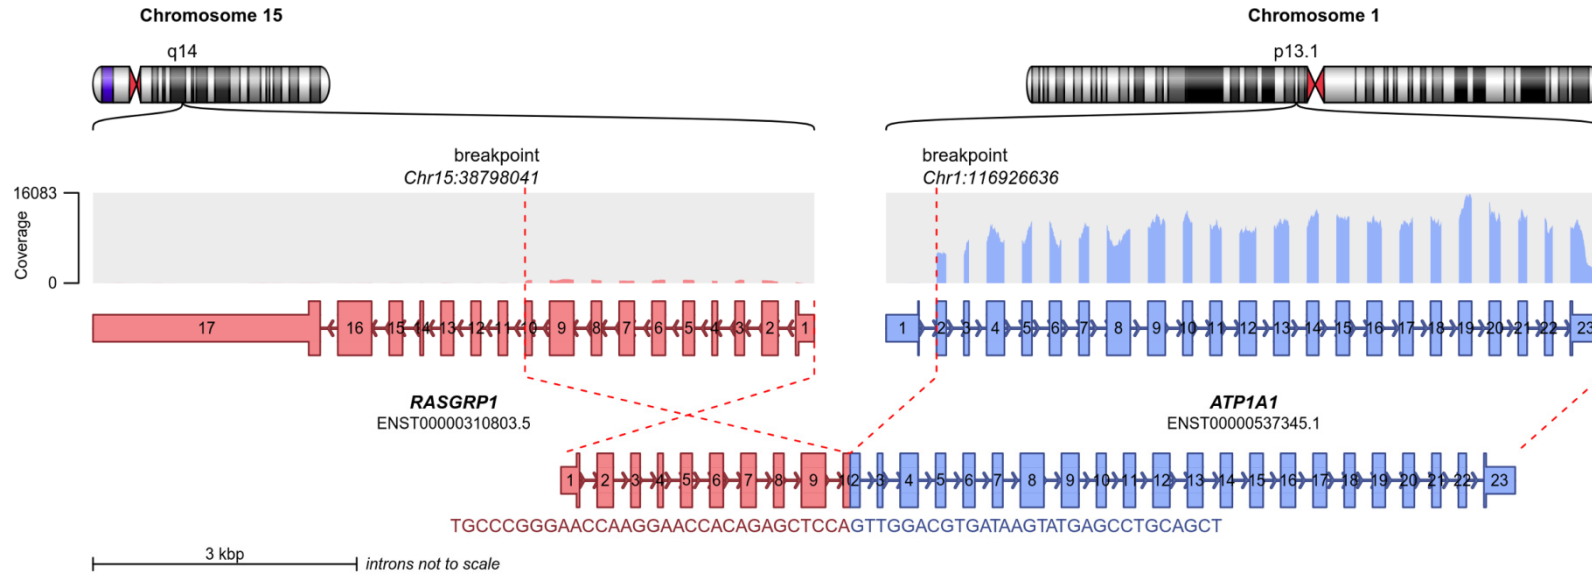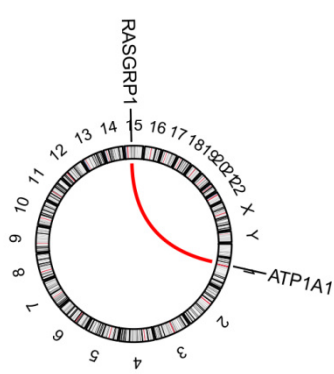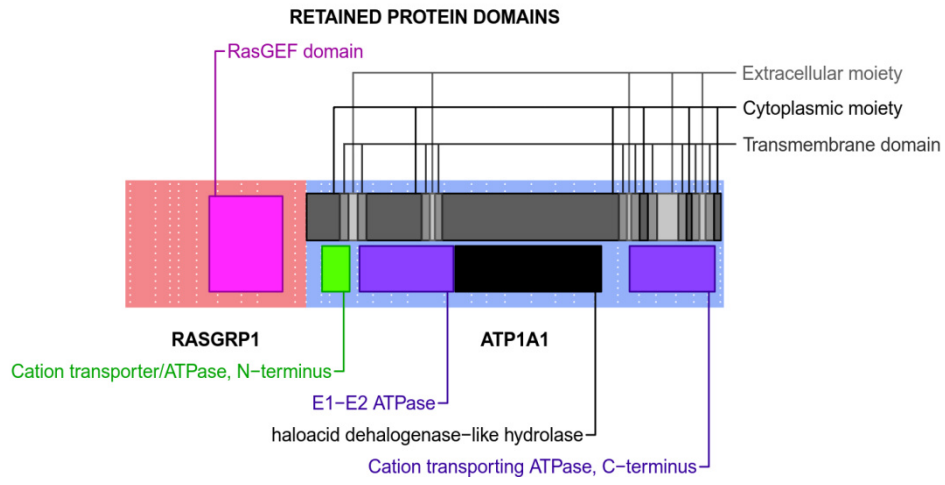

**SUPPORTING READ COUNT**  
 Split reads in *RASGRP1* = 131  
 Split reads in *ATP1A1* = 76  
 Discordant mates = 36

# PDAC009T (ERR1880131, ERR1880132)

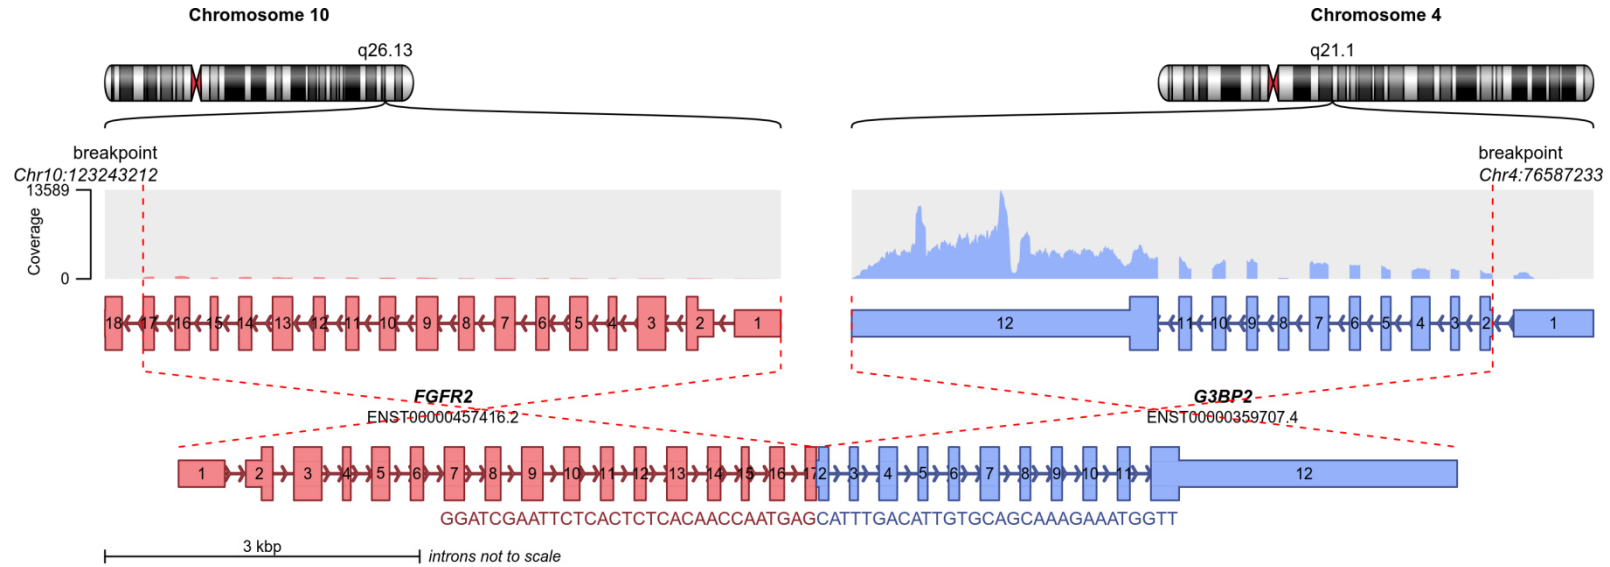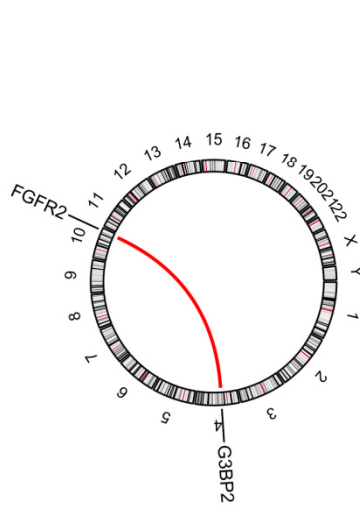

## RETAINED PROTEIN DOMAINS

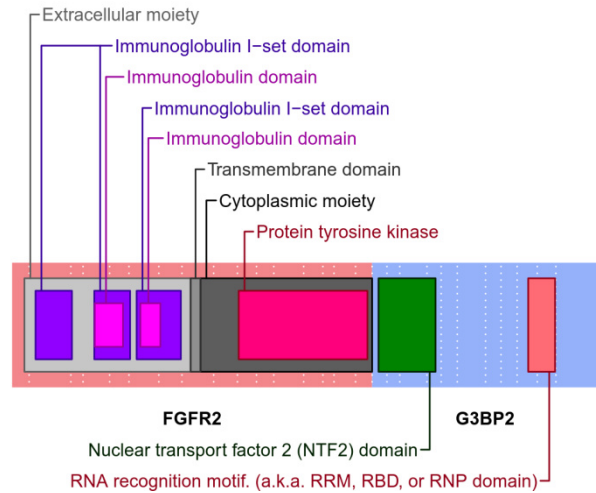

## SUPPORTING READ COUNT

Split reads in *FGFR2* = 33  
 Split reads in *G3BP2* = 103  
 Discordant mates = 300

ICGC\_0338 (EGAF00001682709)

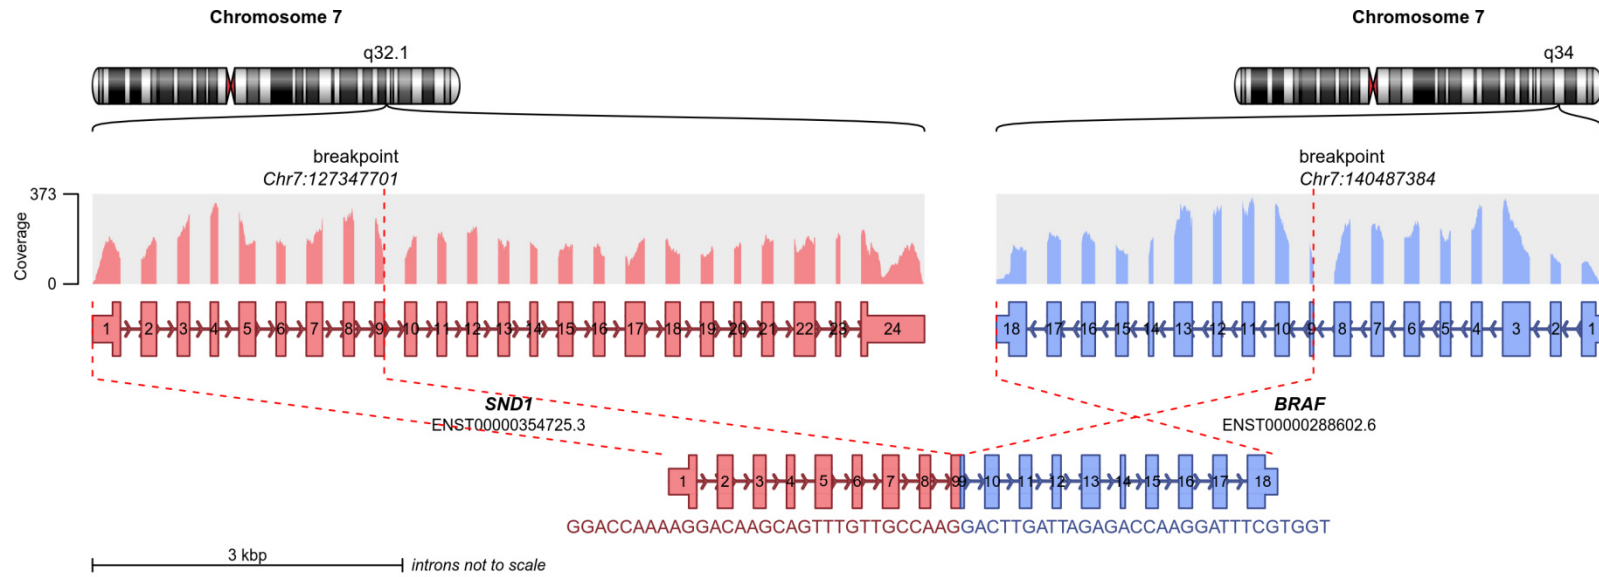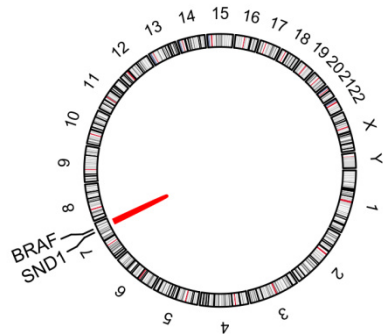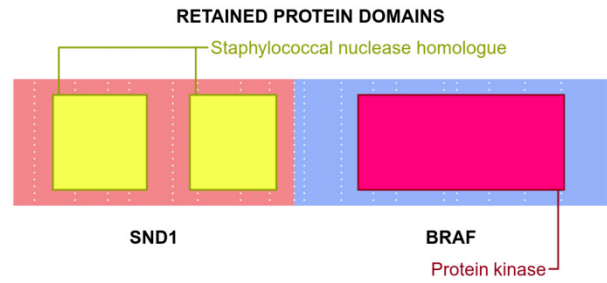

**SUPPORTING READ COUNT**

Split reads in *SND1* = 33

Split reads in *BRAF* = 49

Discordant mates = 18

# ICGC\_0391 (EGAF00001682868)

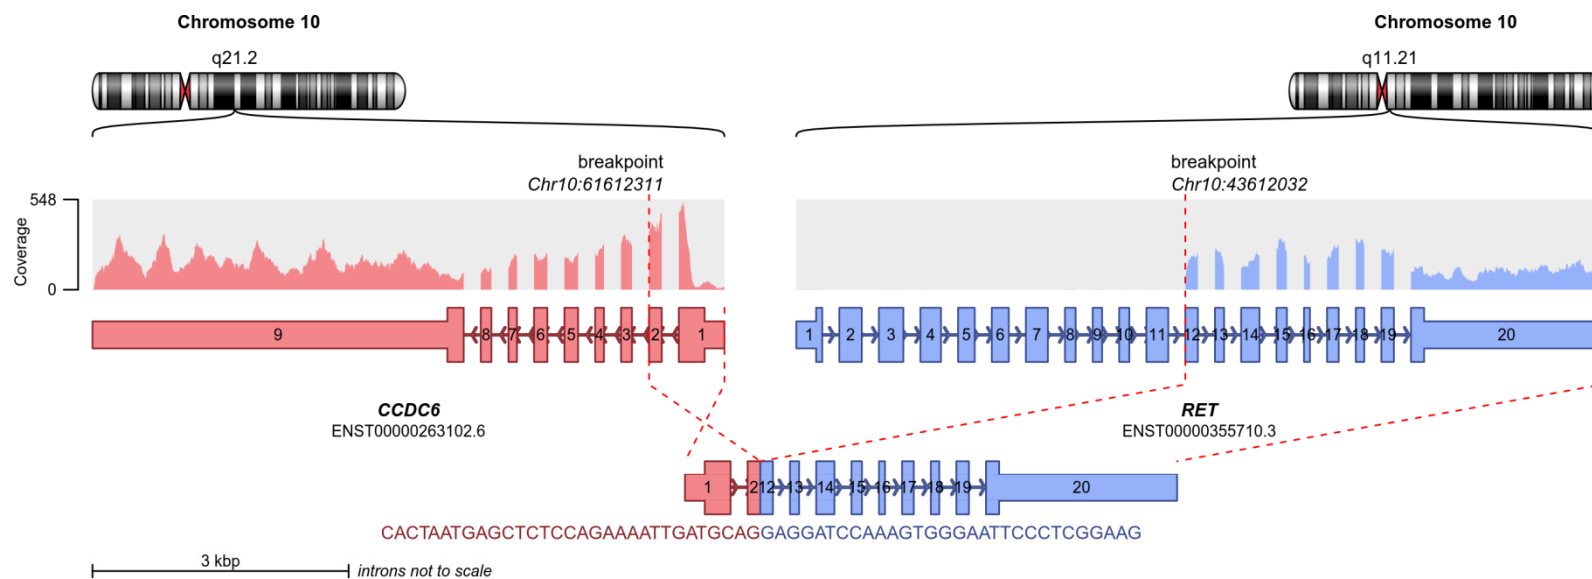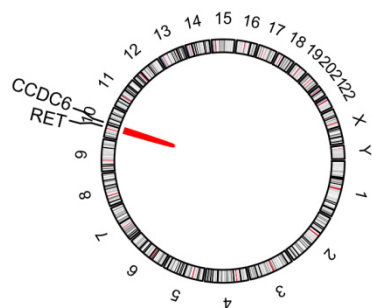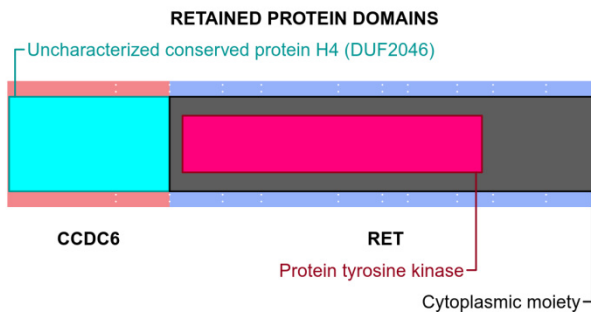

## SUPPORTING READ COUNT

Split reads in **CCDC6** = 51  
 Split reads in **RET** = 31  
 Discordant mates = 11



**PCSI\_0572 (EGAF00001844274, EGAF00001879250, EGAF00001879251)**

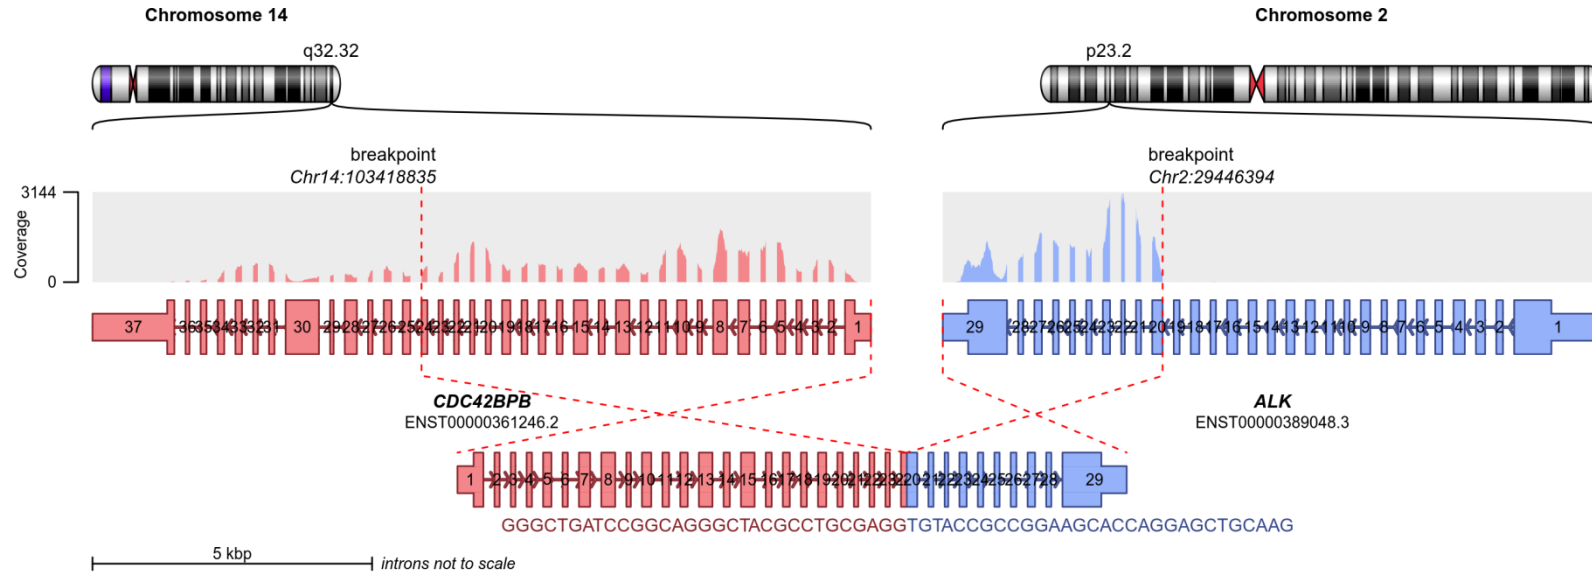

GGGCTGATCCGGCAGGGCTACGCCTGCGAGGTGTACCGCCGAAGCACCAGGAGCTGCAAG

**RETAINED PROTEIN DOMAINS**

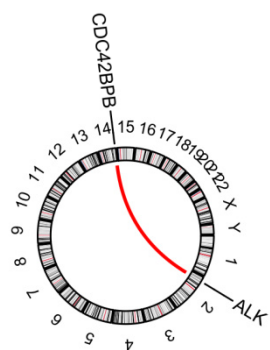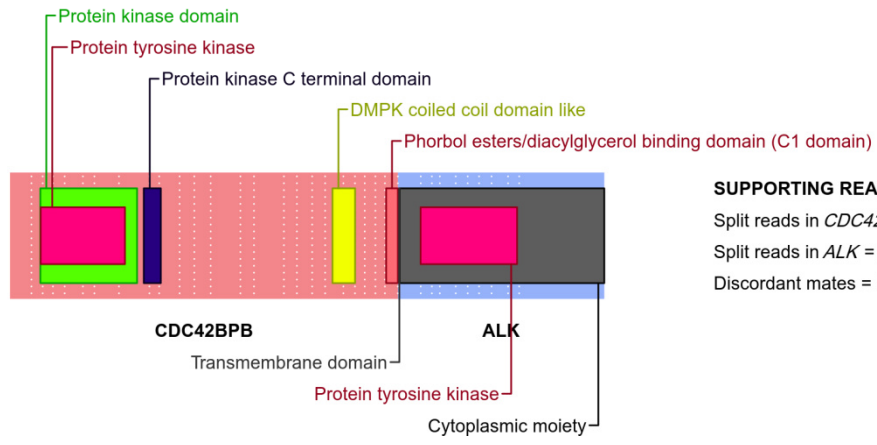

**SUPPORTING READ COUNT**

Split reads in *CDC42BPB* = 28  
 Split reads in *ALK* = 24  
 Discordant mates = 6

**PCSI\_0108 (EGAF00001844288, EGAF00001878986, EGAF00001878987)**

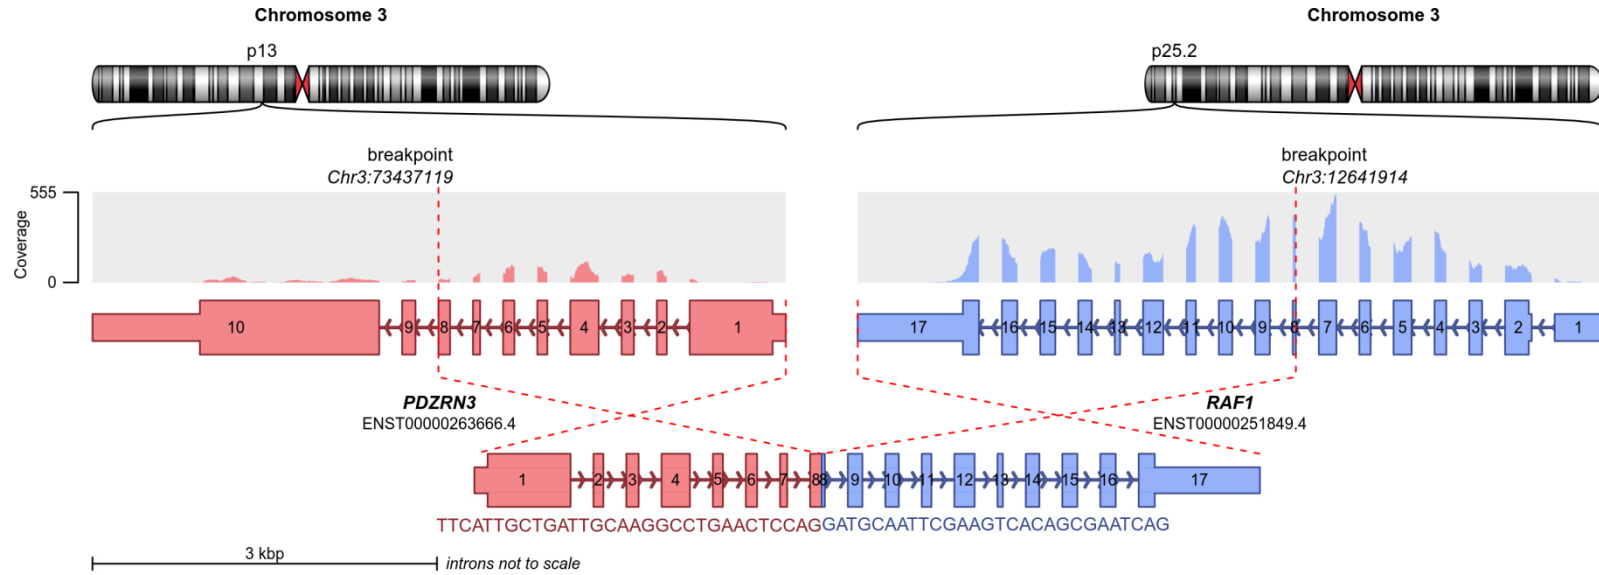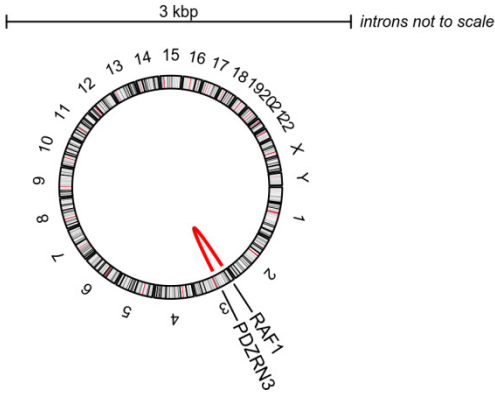

**RETAINED PROTEIN DOMAINS**

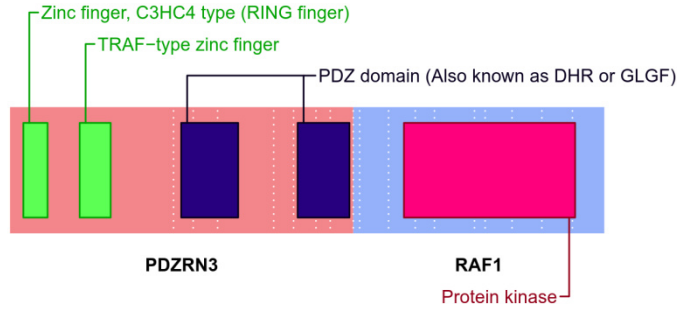

**SUPPORTING READ COUNT**

Split reads in *PDZRN3* = 0  
 Split reads in *RAF1* = 1  
 Discordant mates = 1

**PCSI\_0279 (EGAF00001844342, EGAF00001879056, EGAF00001879057)**

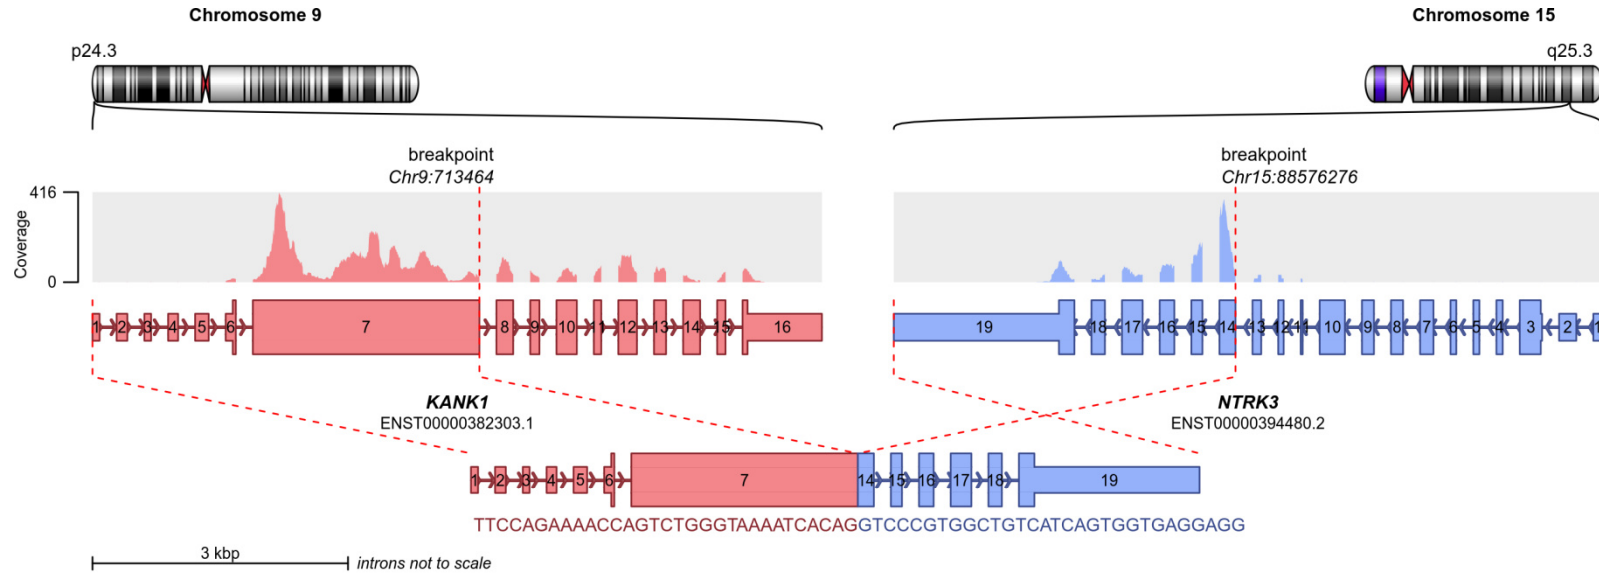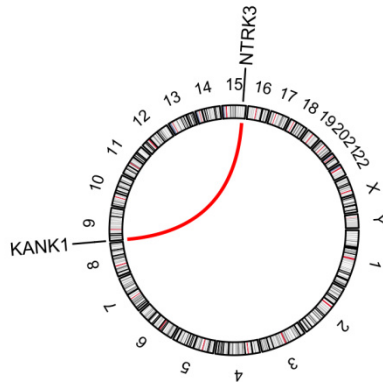

**RETAINED PROTEIN DOMAINS**

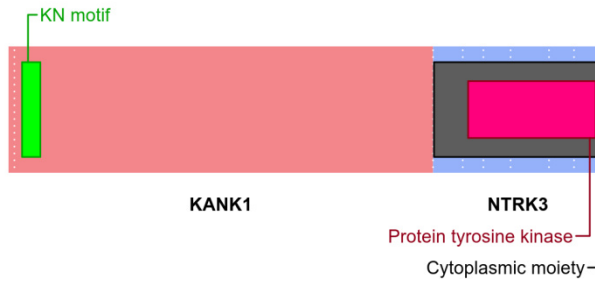

**SUPPORTING READ COUNT**

- Split reads in **KANK1** = 1
- Split reads in **NTRK3** = 4
- Discordant mates = 2

**PCSI\_0305 (EGAF00001844367, EGAF00001879088, EGAF00001879089)**

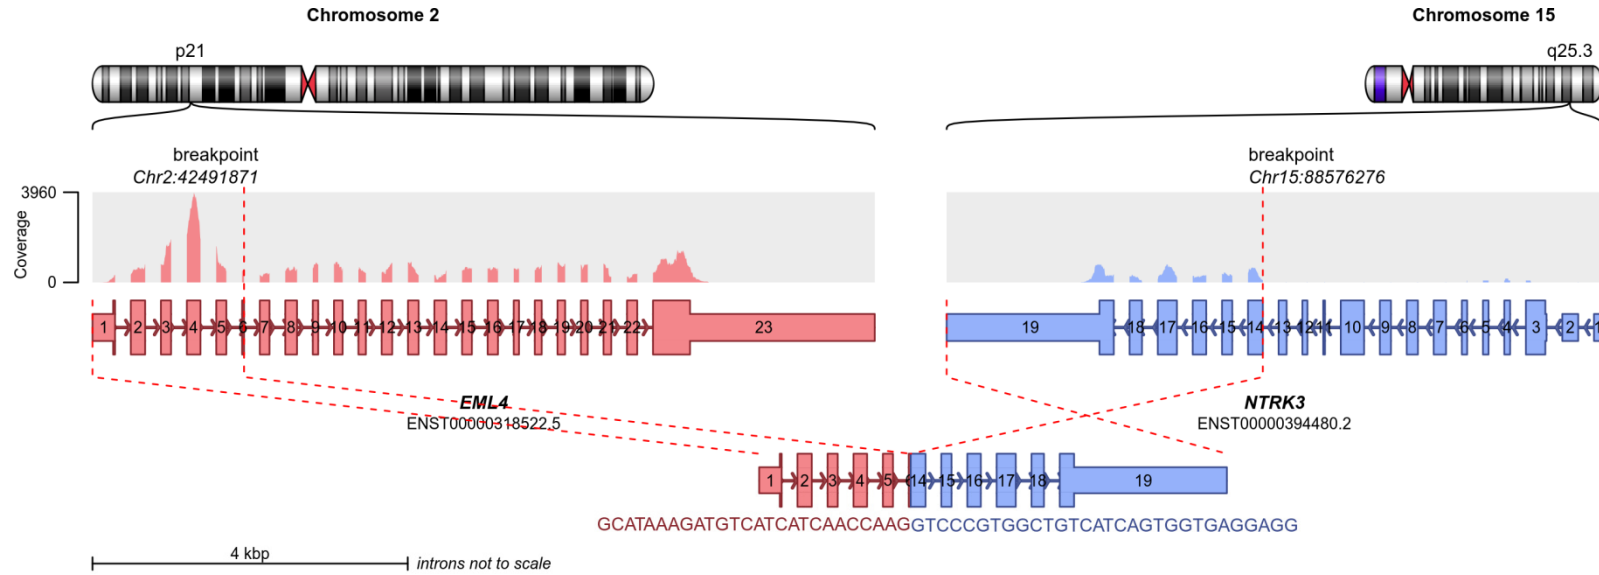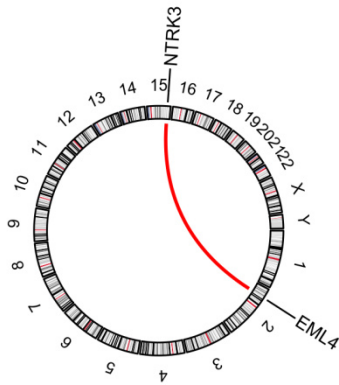

**RETAINED PROTEIN DOMAINS**

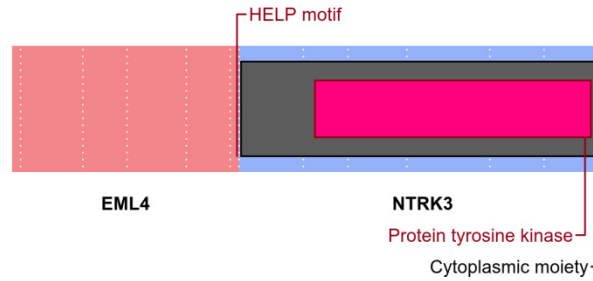

**SUPPORTING READ COUNT**

Split reads in *EML4* = 3  
 Split reads in *NTRK3* = 5  
 Discordant mates = 2

**PCSI\_0326 (EGAF00001844548, EGAF00001879104, EGAF00001879105)**

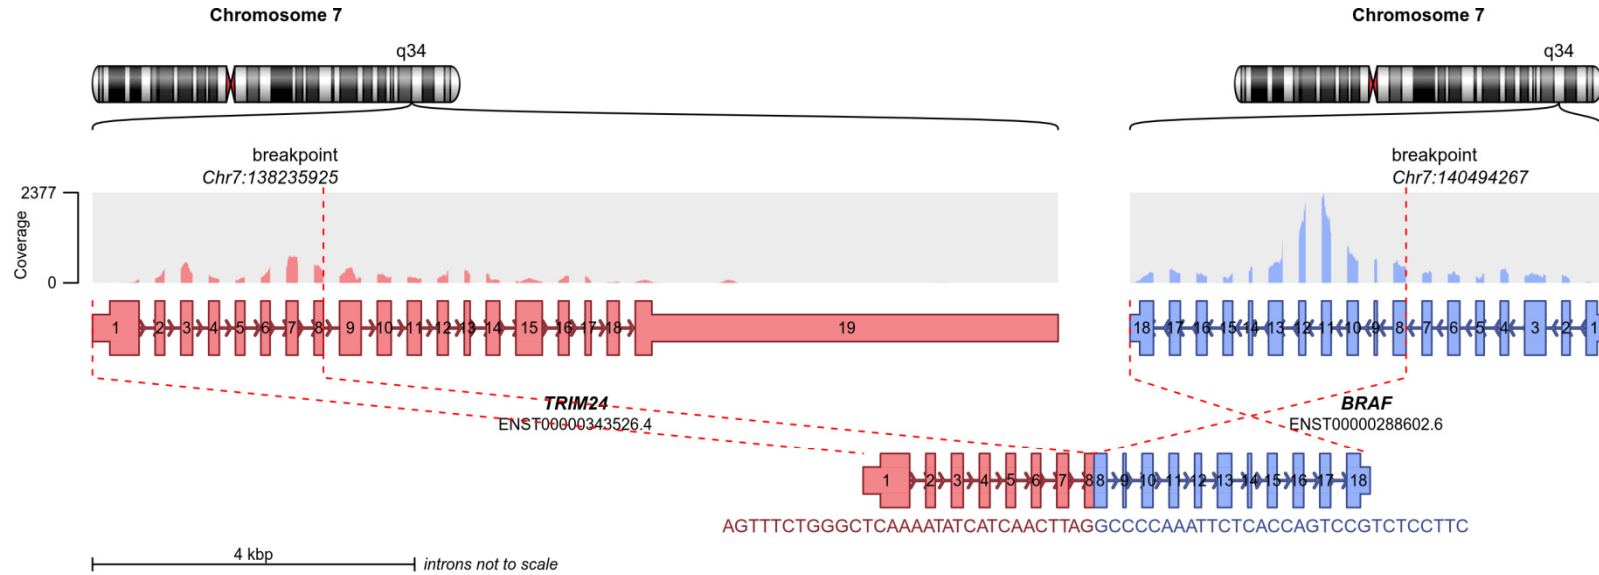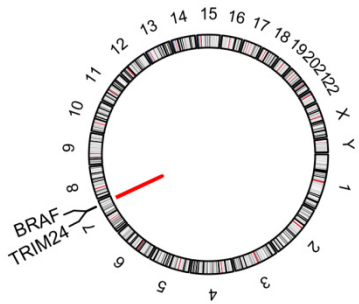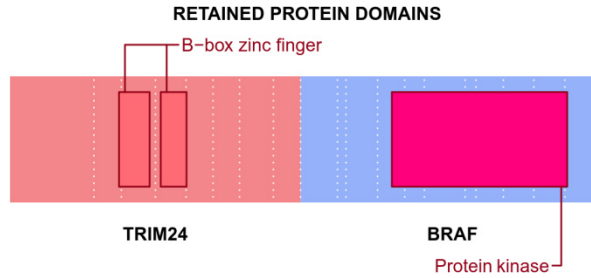

**SUPPORTING READ COUNT**

Split reads in *TRIM24* = 1  
 Split reads in *BRAF* = 1  
 Discordant mates = 0

**PCSI\_0330 (EGAF00001844551, EGAF00001879110, EGAF00001879111)**

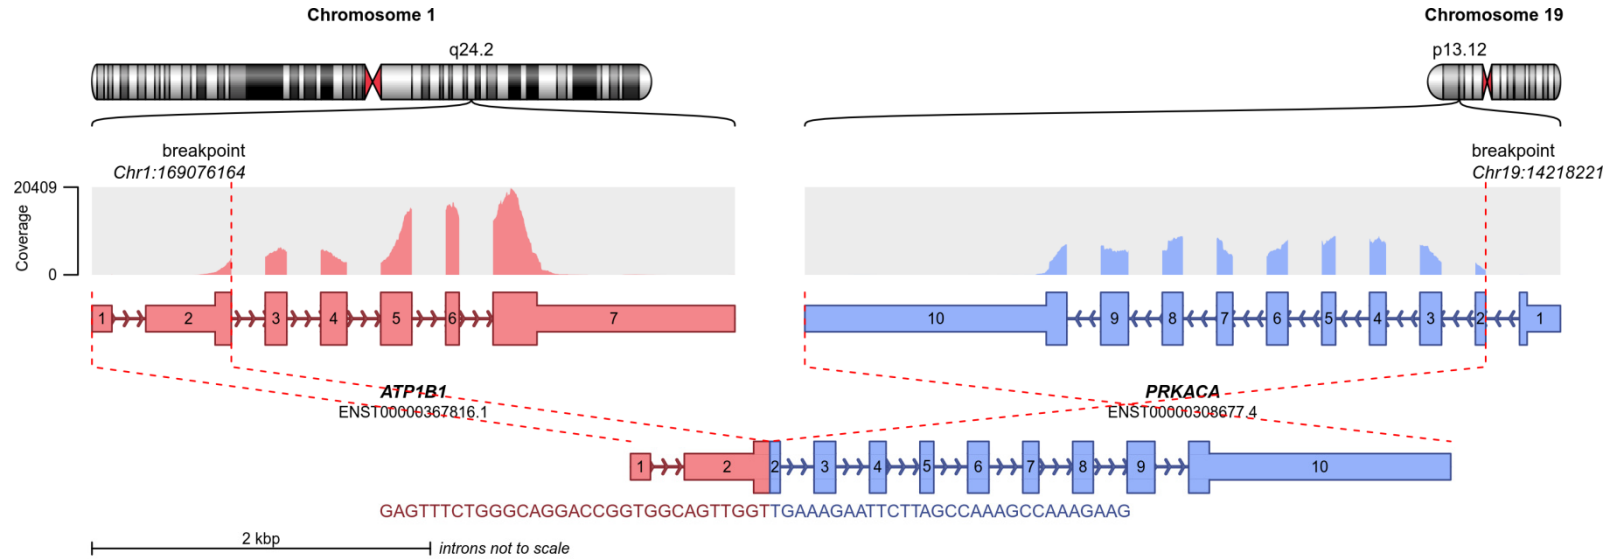

GAGTTTCTGGGCAGGACCGGTGGCAGTTGGTTGAAAGAATTCTTAGCCAAAGCCAAAGAAG

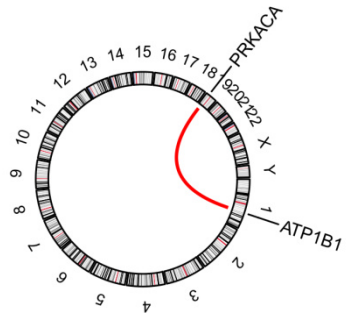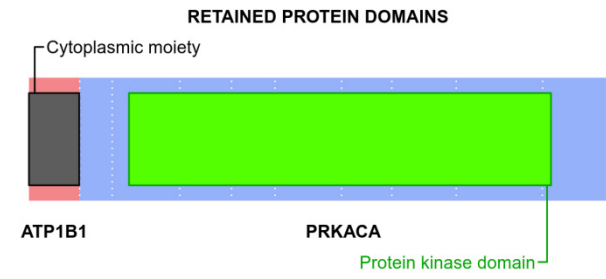

**SUPPORTING READ COUNT**  
 Split reads in *ATP1B1* = 22  
 Split reads in *PRKACA* = 71  
 Discordant mates = 11

**PCSI\_0347 (EGAF00001844561, EGAF00001879130, EGAF00001879131)**

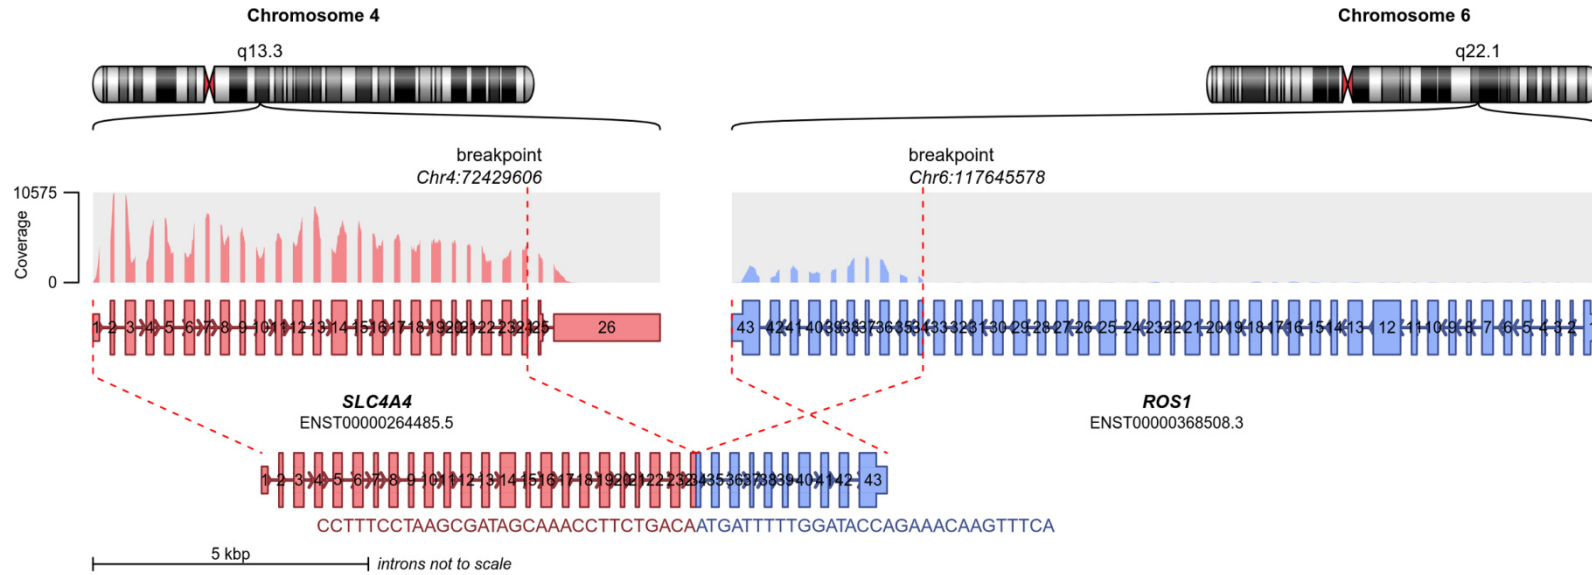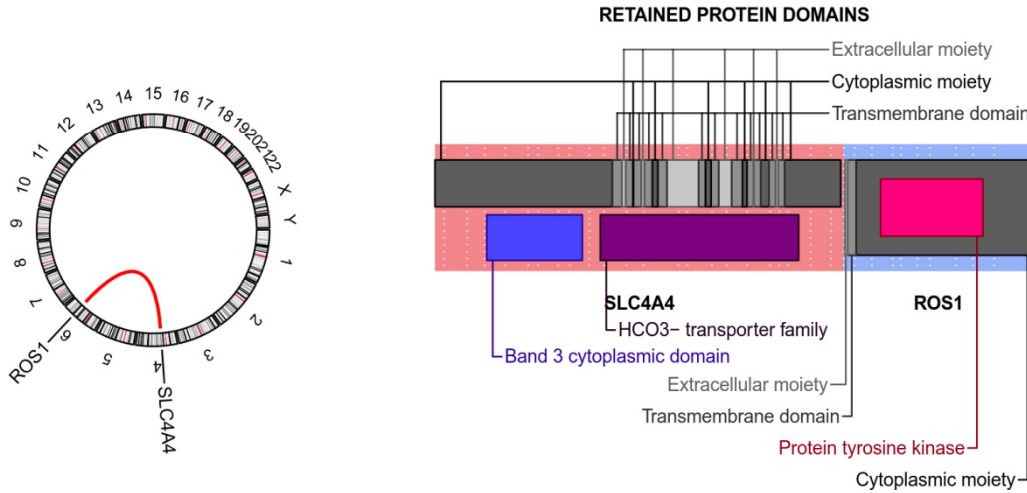

**SUPPORTING READ COUNT**  
 Split reads in *SLC4A4* = 70  
 Split reads in *ROS1* = 69  
 Discordant mates = 22



**PCSI\_0458 (EGAF00001844592, EGAF00001879192, EGAF00001879193)**

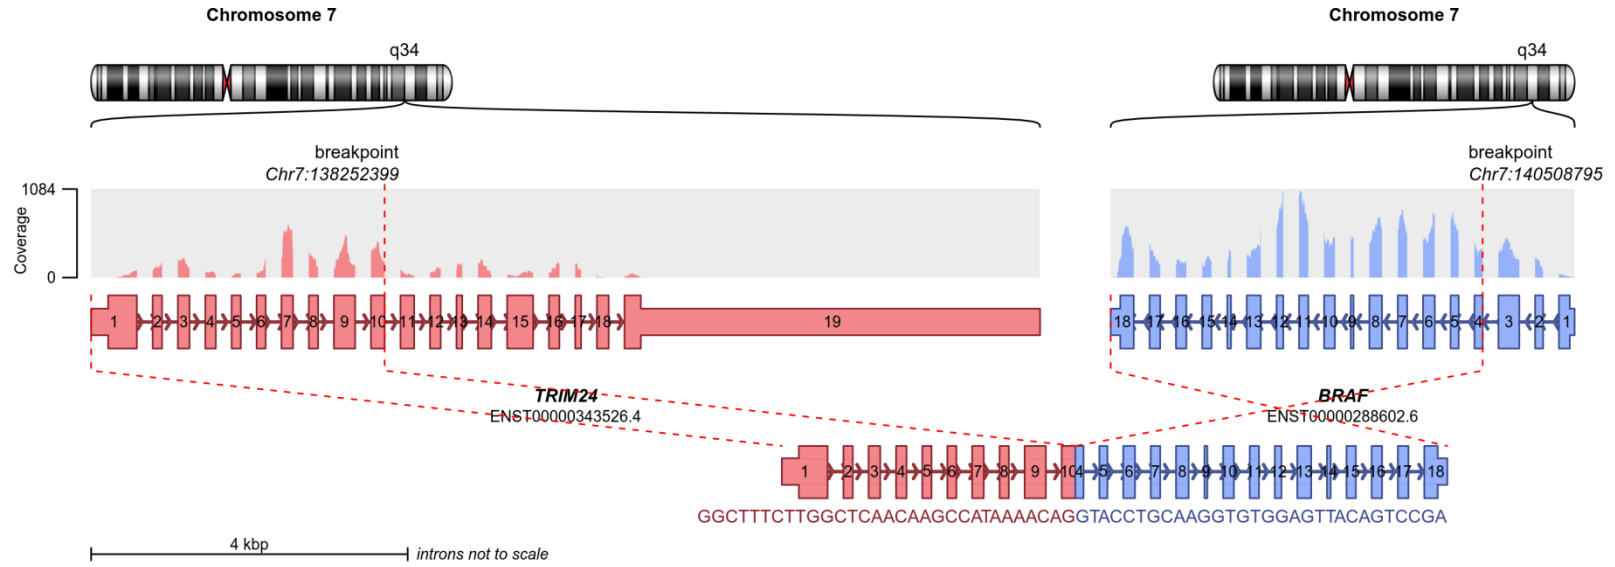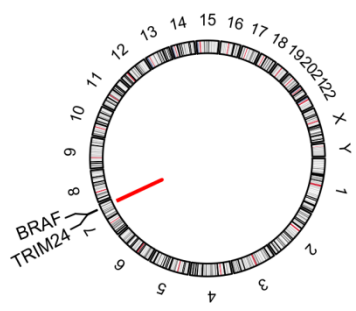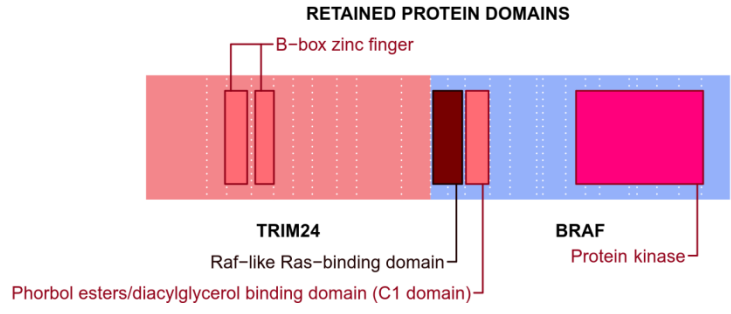

**SUPPORTING READ COUNT**

Split reads in *TRIM24* = 3

Split reads in *BRAF* = 3

Discordant mates = 1

TCGA-3A-A9I5 (163427ab-f1e7-4d63-91a0-66a0513ac795)

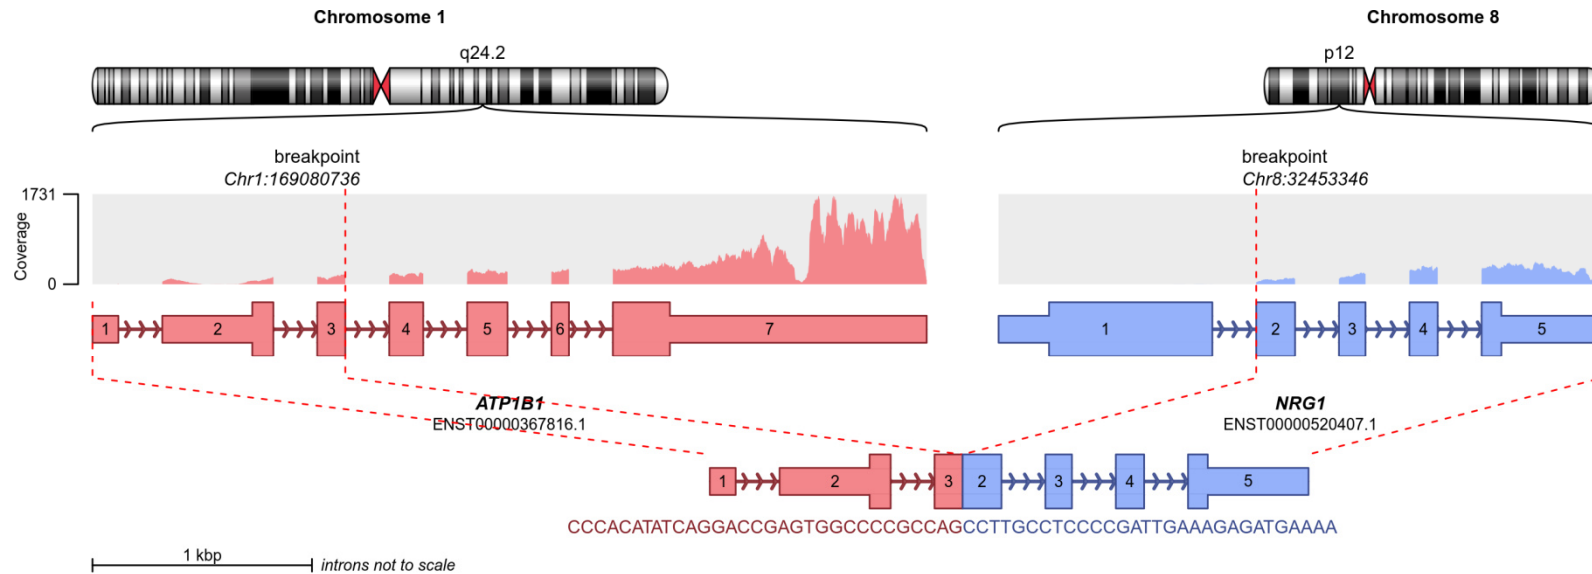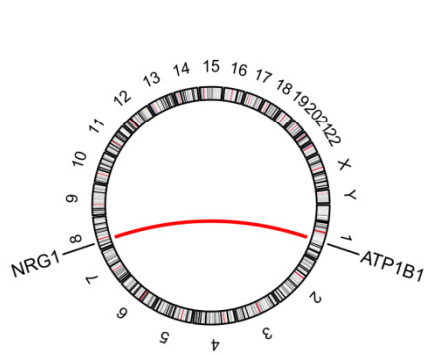

RETAINED PROTEIN DOMAINS

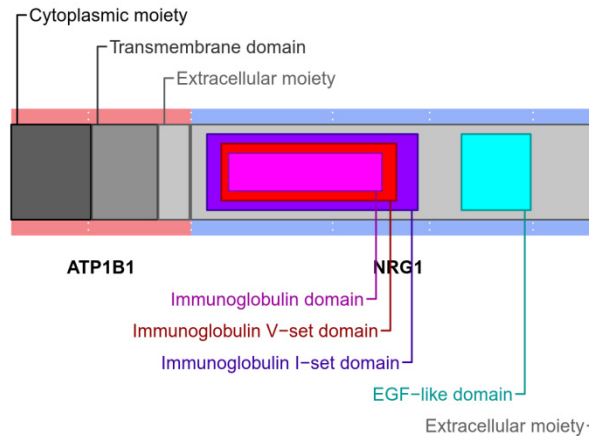

SUPPORTING READ COUNT

Split reads in *ATP1B1* = 9  
 Split reads in *NRG1* = 15  
 Discordant mates = 70

TCGA-F2-A44H (65d99cd1-7601-4dec-a9dd-e6d28880164d)

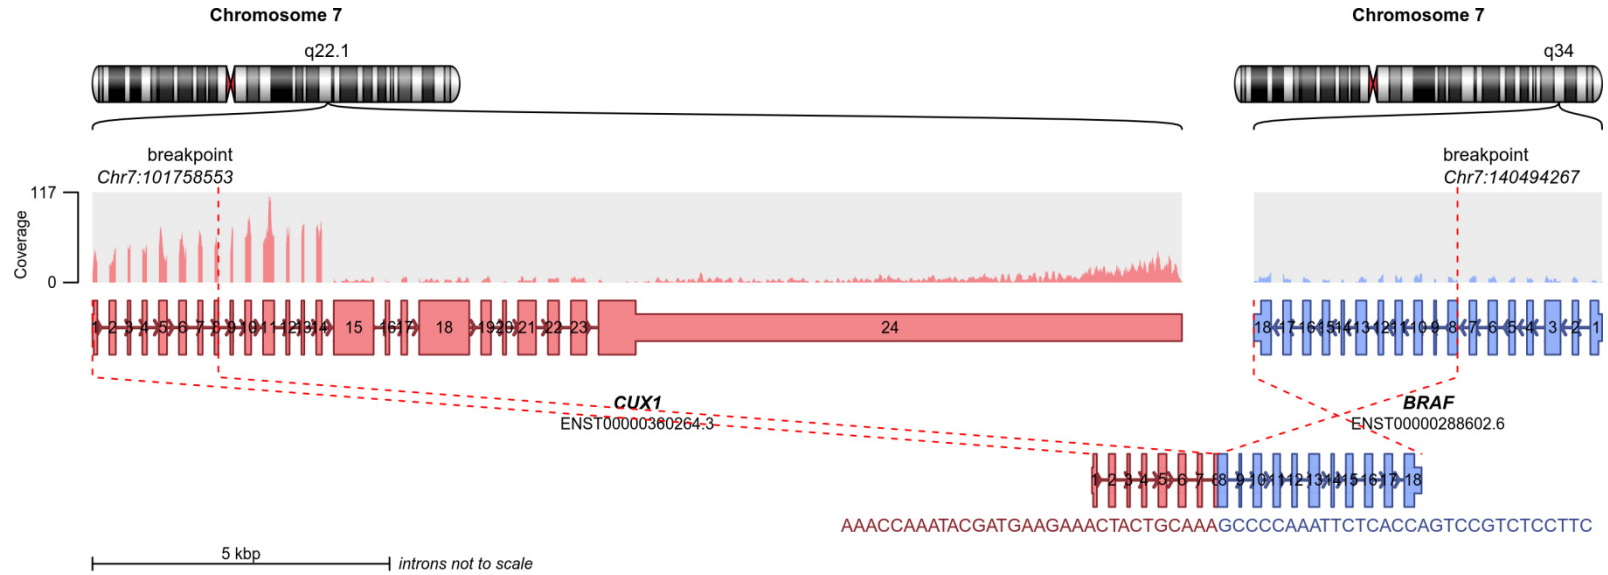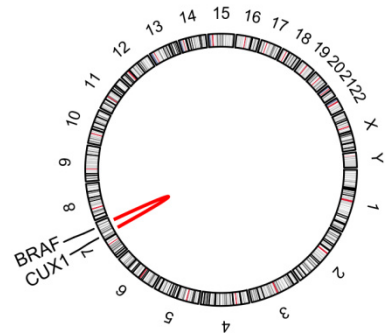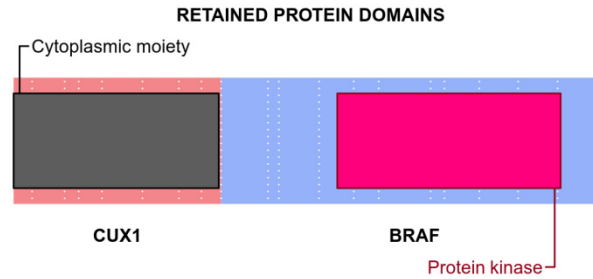

**SUPPORTING READ COUNT**

Split reads in *CUX1* = 0  
 Split reads in *BRAF* = 2  
 Discordant mates = 4

TCGA-FB-AAPP (43dc033e-ed48-486d-af91-7bef6ad03cdc)

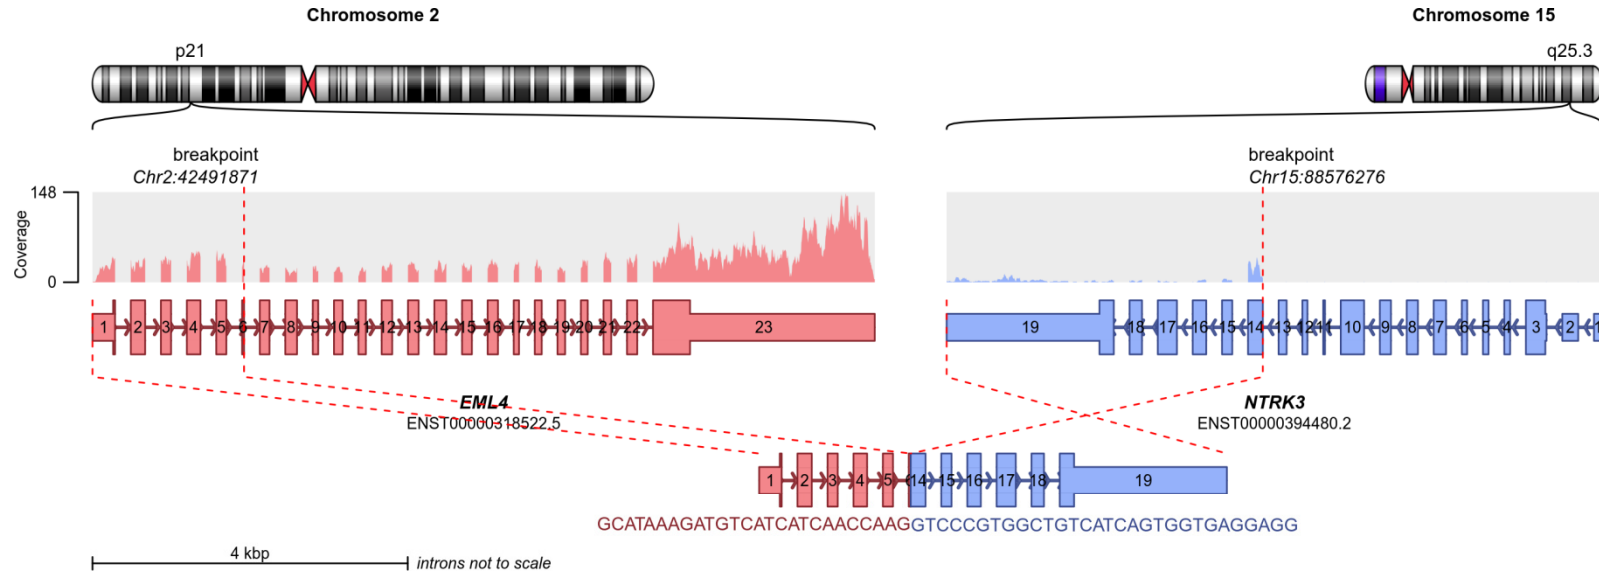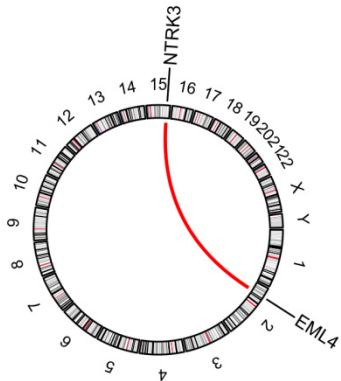

RETAINED PROTEIN DOMAINS

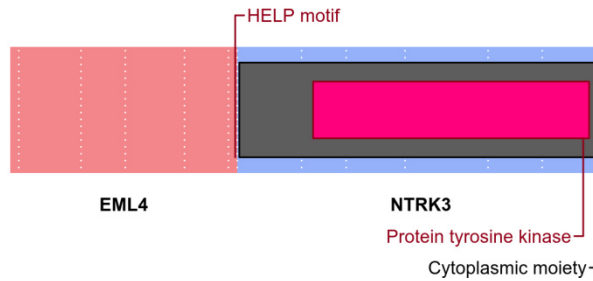

SUPPORTING READ COUNT

Split reads in *EML4* = 1  
 Split reads in *NTRK3* = 3  
 Discordant mates = 26

TCGA-HZ-7918 (8a2f438c-93cd-43c0-97e1-28176d0b93ef)

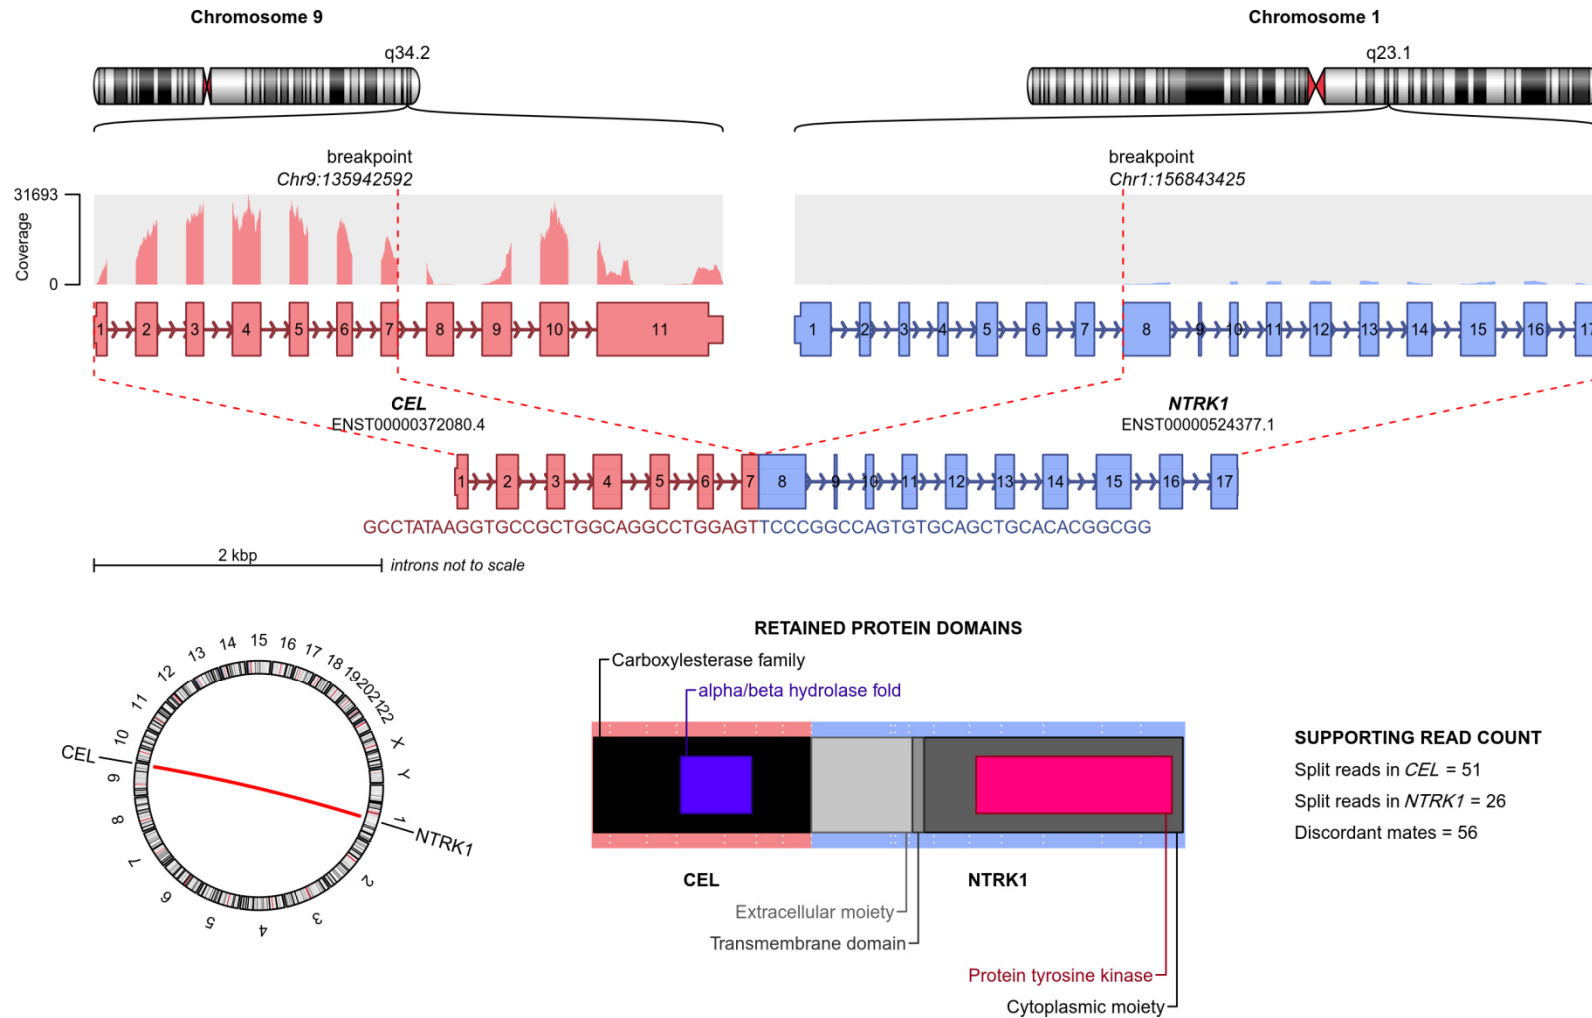

**Supplemental Figure S6: Putative driver fusions identified by Arriba in pancreatic cancer samples.**  
 In 30 of 803 RNA-Seq samples from pancreatic cancer patients Arriba identified a potential oncogenic fusion.
