# Supplementary material for: Accurate and efficient detection of gene fusions from RNA sequencing data
Source: PubMed Central journal article supplement (PMC7919457; doi:10.1101/gr.257246.119), 2021-03
Supplement: supp_gr.257246.119_Supplemental_Figure_S7.pdf [file supp_gr.257246.119_Supplemental_Figure_S7.pdf]

**COMP-002 (EGAF00001709816)**

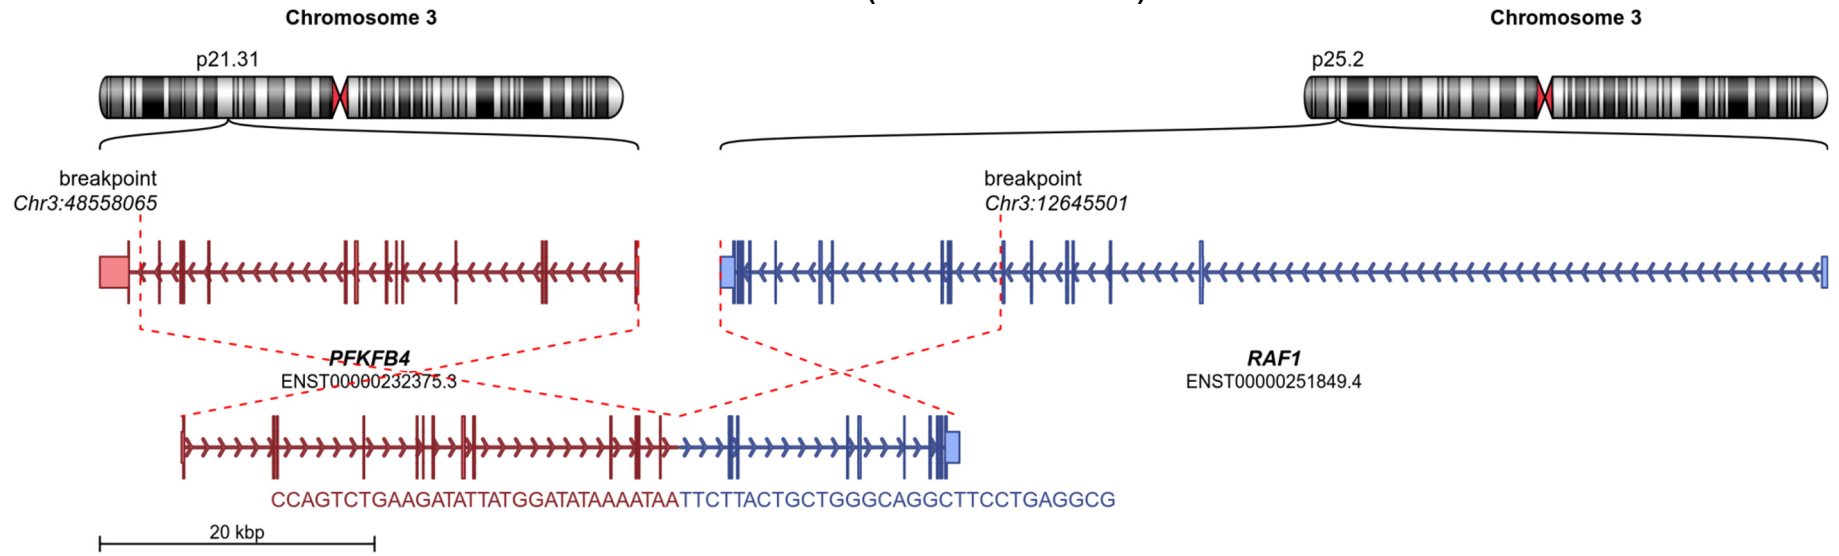

COMP-0023 (EGAF00001709871)

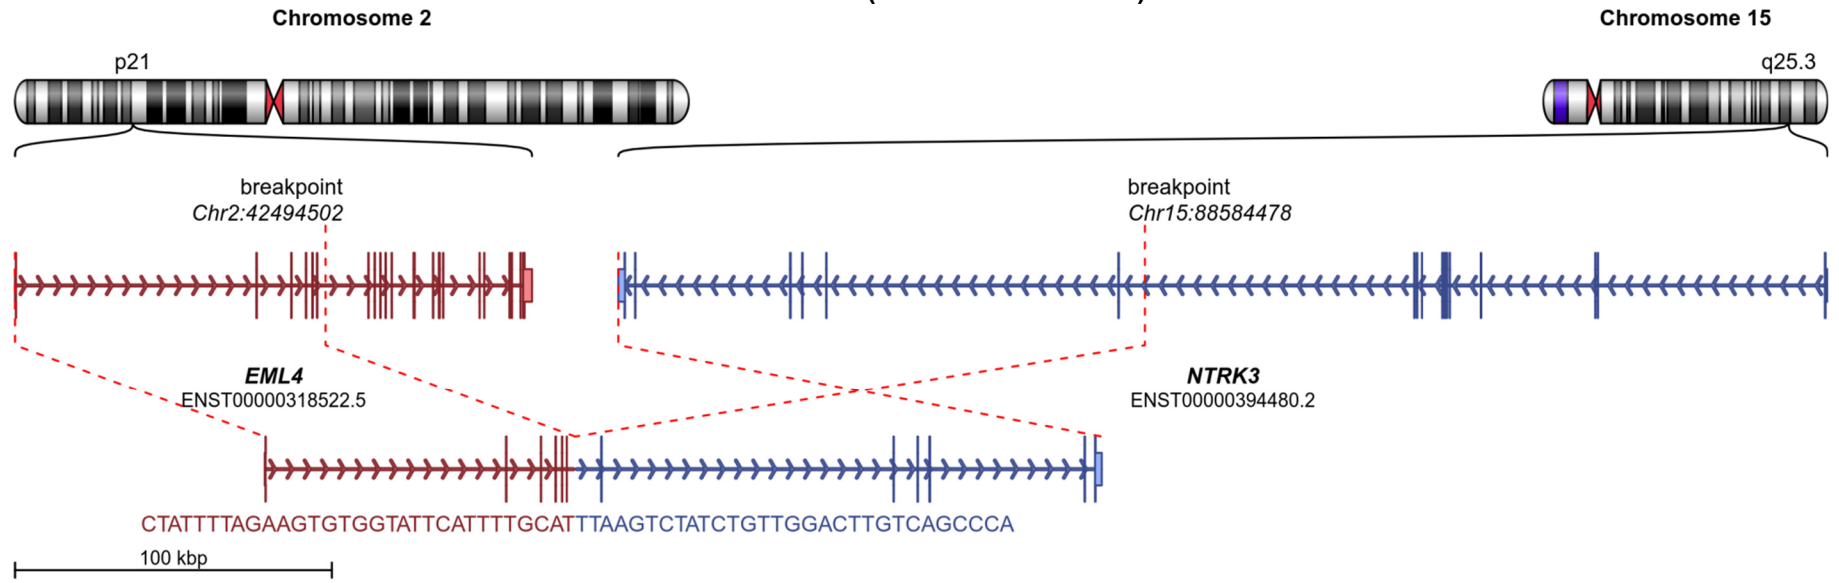

# COMP-0028 (EGAF00001709880)

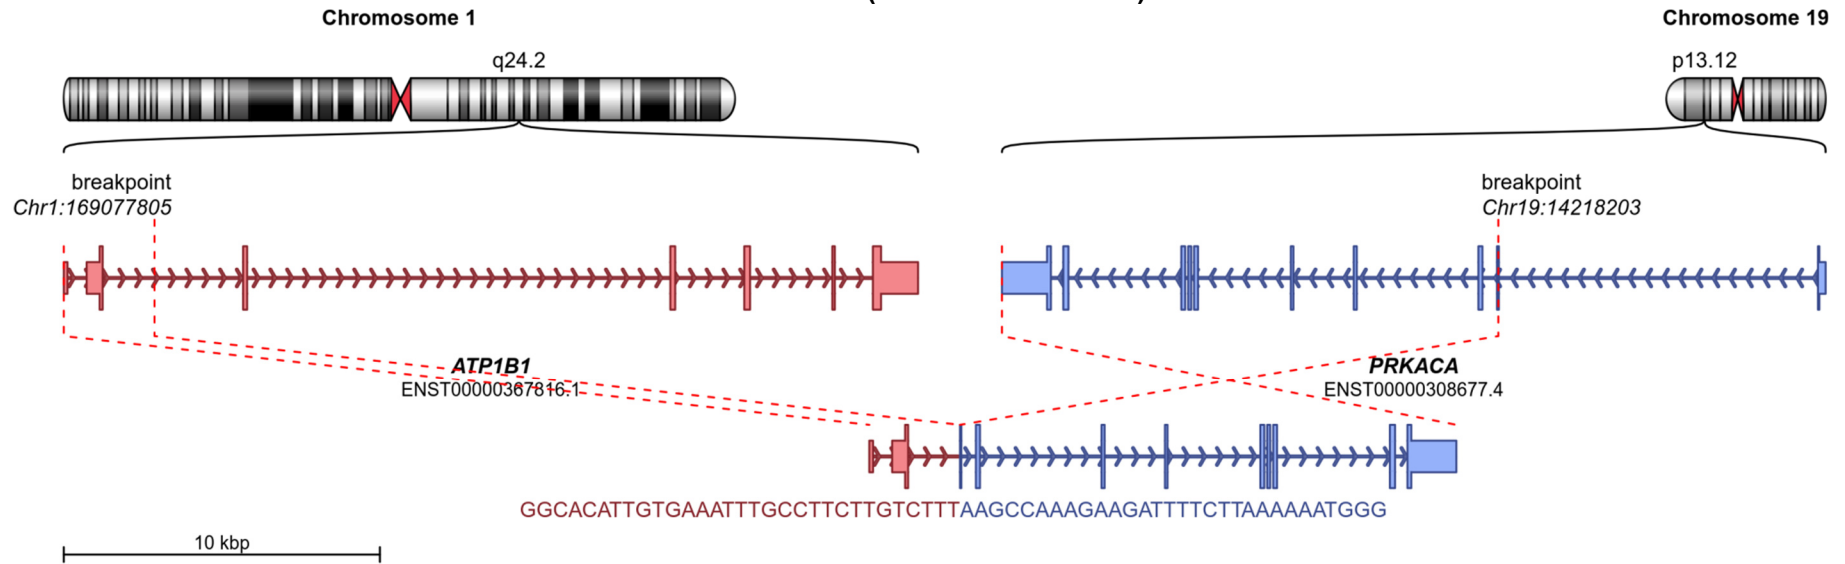

COMP-0055 (EGAF00001720843)

Chromosome 20

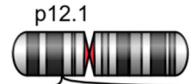

p12.1

breakpoint  
Chr20:17611430

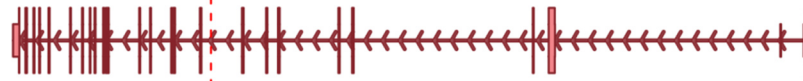

**RRBP1**  
ENST00000377807:2

Chromosome 3

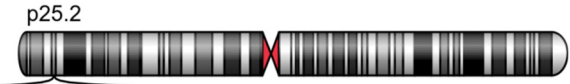

p25.2

breakpoint  
Chr3:12657584

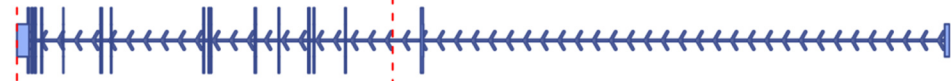

**RAF1**  
ENST00000251849.4

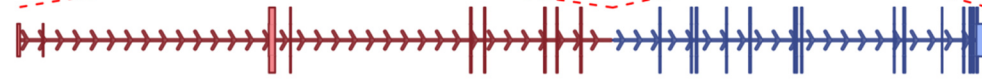

GGTGTGGTGGGCCTGTCTGTCTGAGTGAGGTAGCTATTATTATTATTATTATGATTT

30 kbp

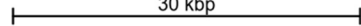

ICGC\_0338 (EGAF00001144272)

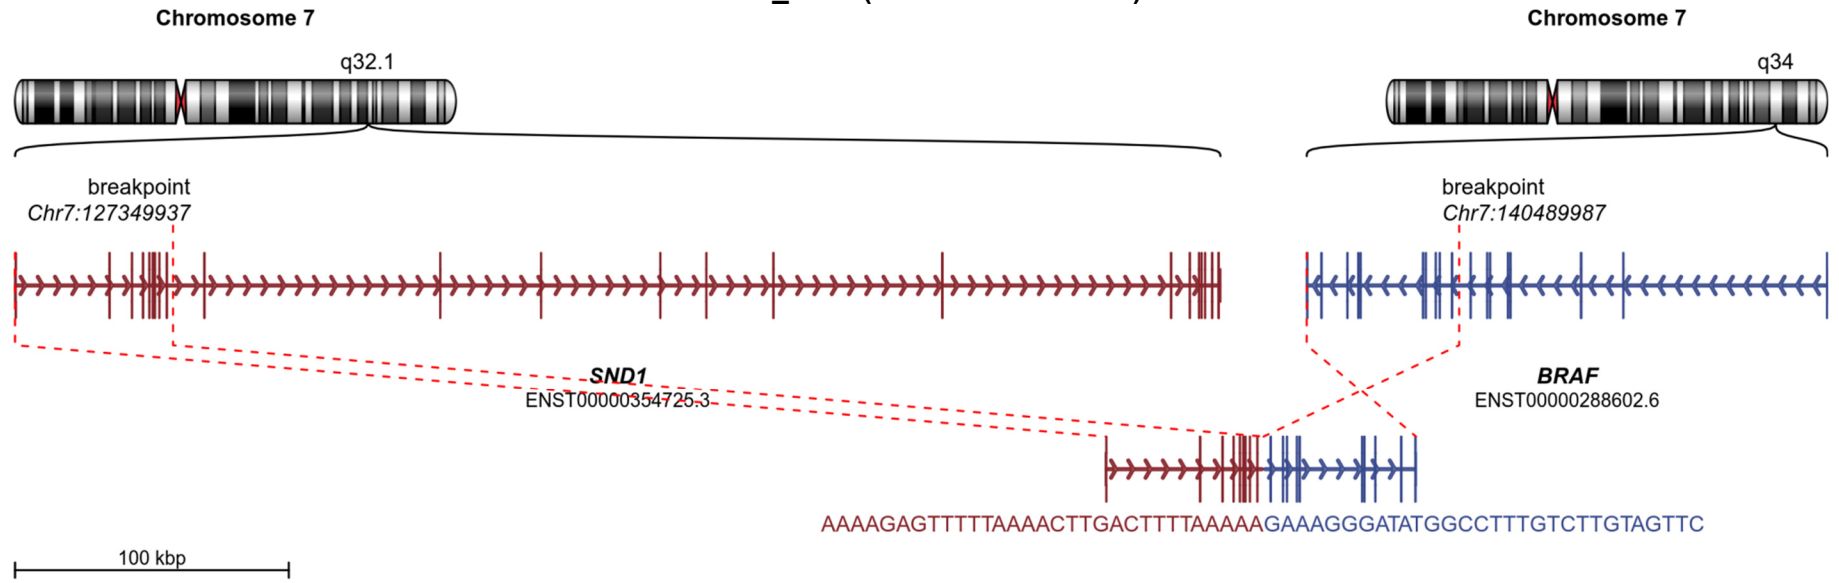

ICGC\_0391 (EGAF00001144341)

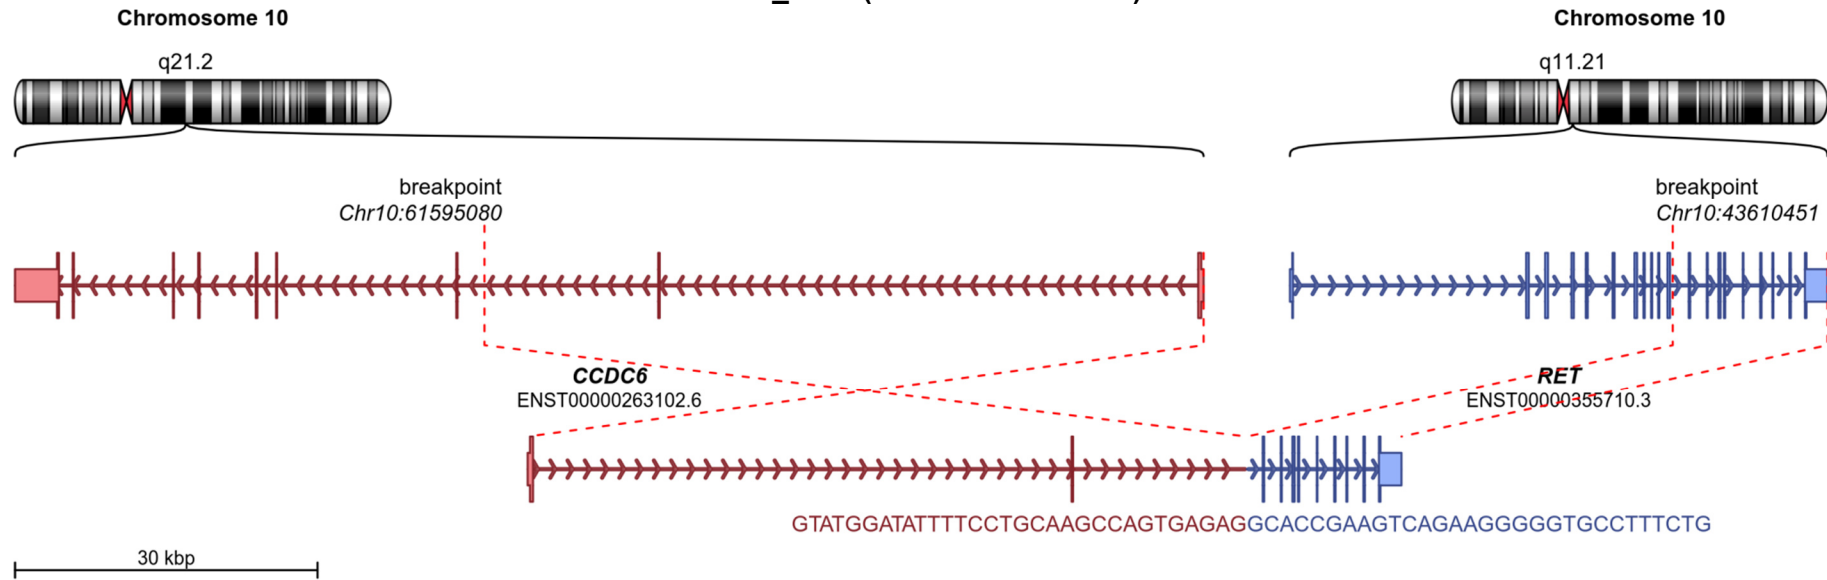

**Patient 14 (EGAF00001984740)**

Chromosome 1

Chromosome 8

q24.2

p12

breakpoint  
Chr1:169088266

breakpoint  
Chr8:32447498

**ATP1B1**  
ENST00000367816.1

**NRG1**  
ENST00000520407.1

GAAATGATGAACCTTGCTACATTATAAATTGTGTGACATAGCAAATAGGAAAAGCAGA

200 kbp

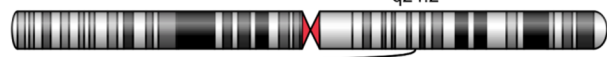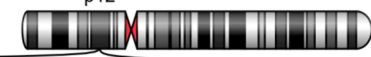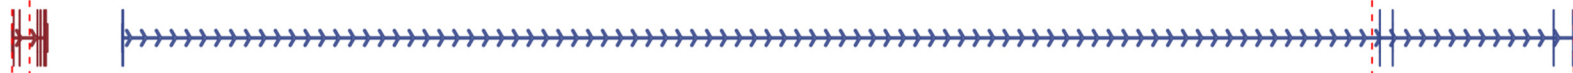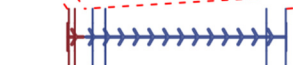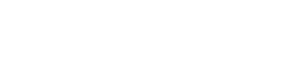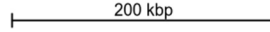

**Patient 17 (EGAF00001984732)**

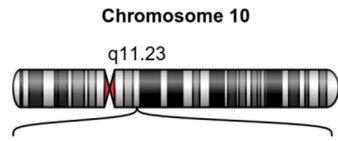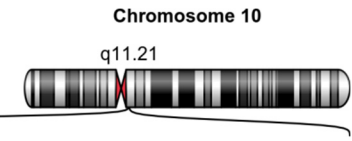

breakpoint  
Chr10:51587787

breakpoint  
Chr10:43611343

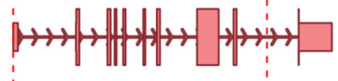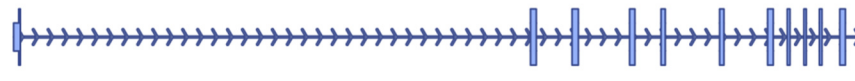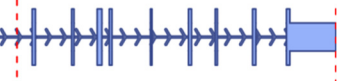

**NCOA4**  
ENST00000443446.1

**RET**  
ENST00000355710:3

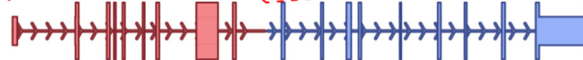

CAGTAGTTCTCAACAGAGGGCTTAAAATATGCTAAATCTACTCTGCCTTGTGCTCTAGAAATGGAAAGGGGCCAGACCAGGACAGCCCAGGAGCAGG

10 kbp



Patient A (EGAF00002486940)

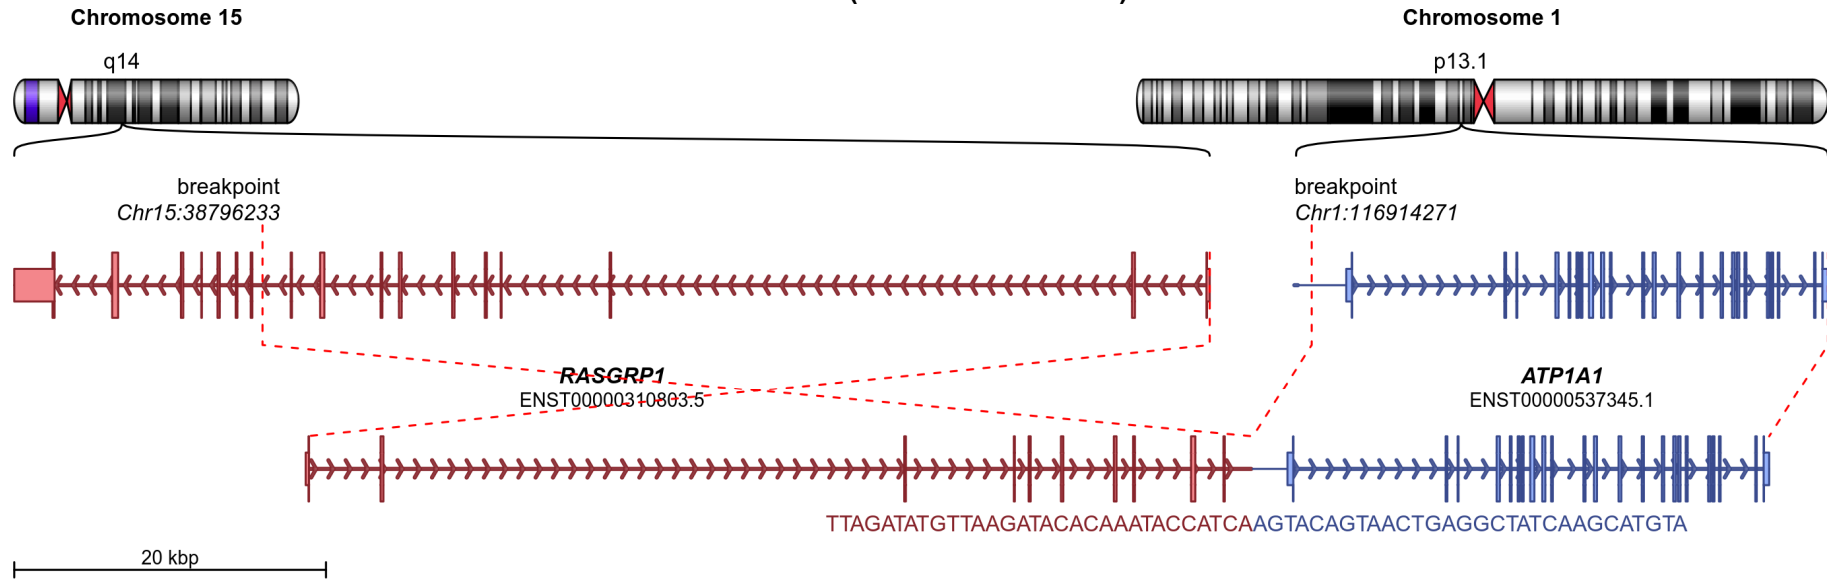

PCSI\_0108 (EGAF00001556794)

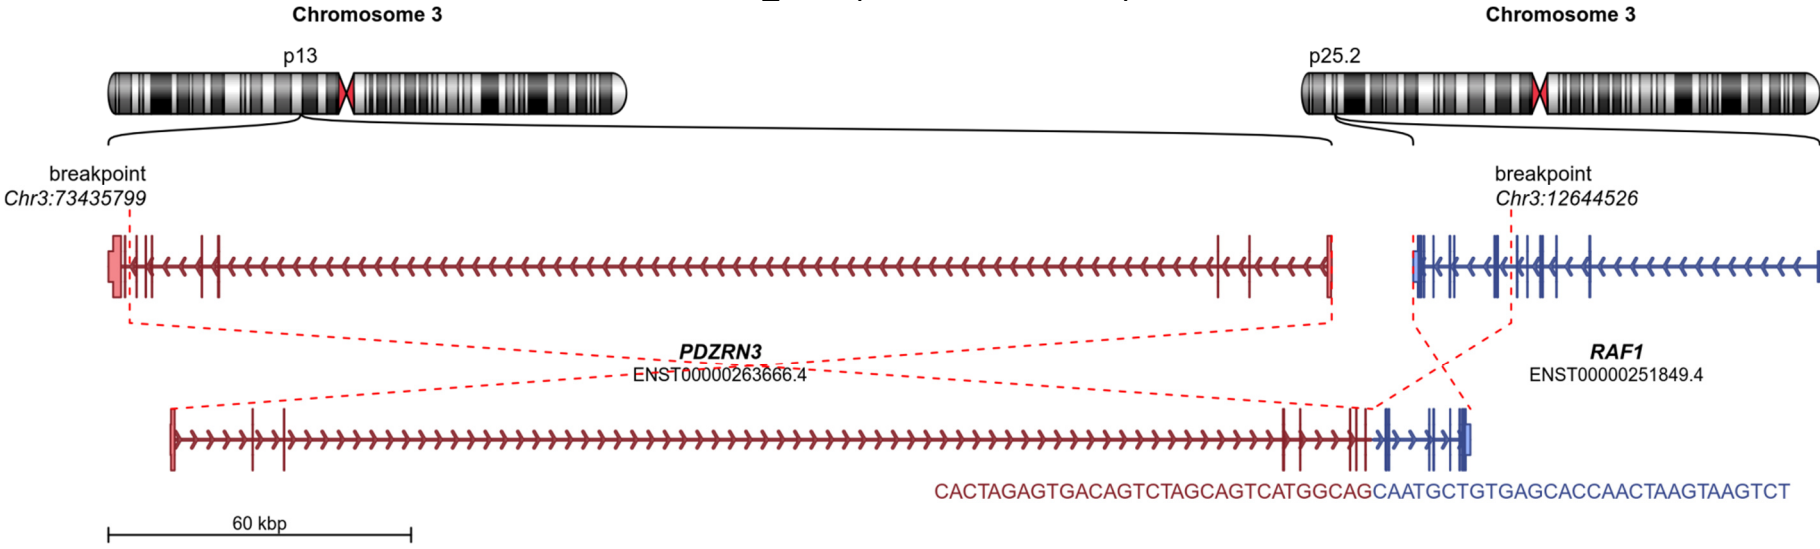

PCSI\_0279 (EGAF00001556830)

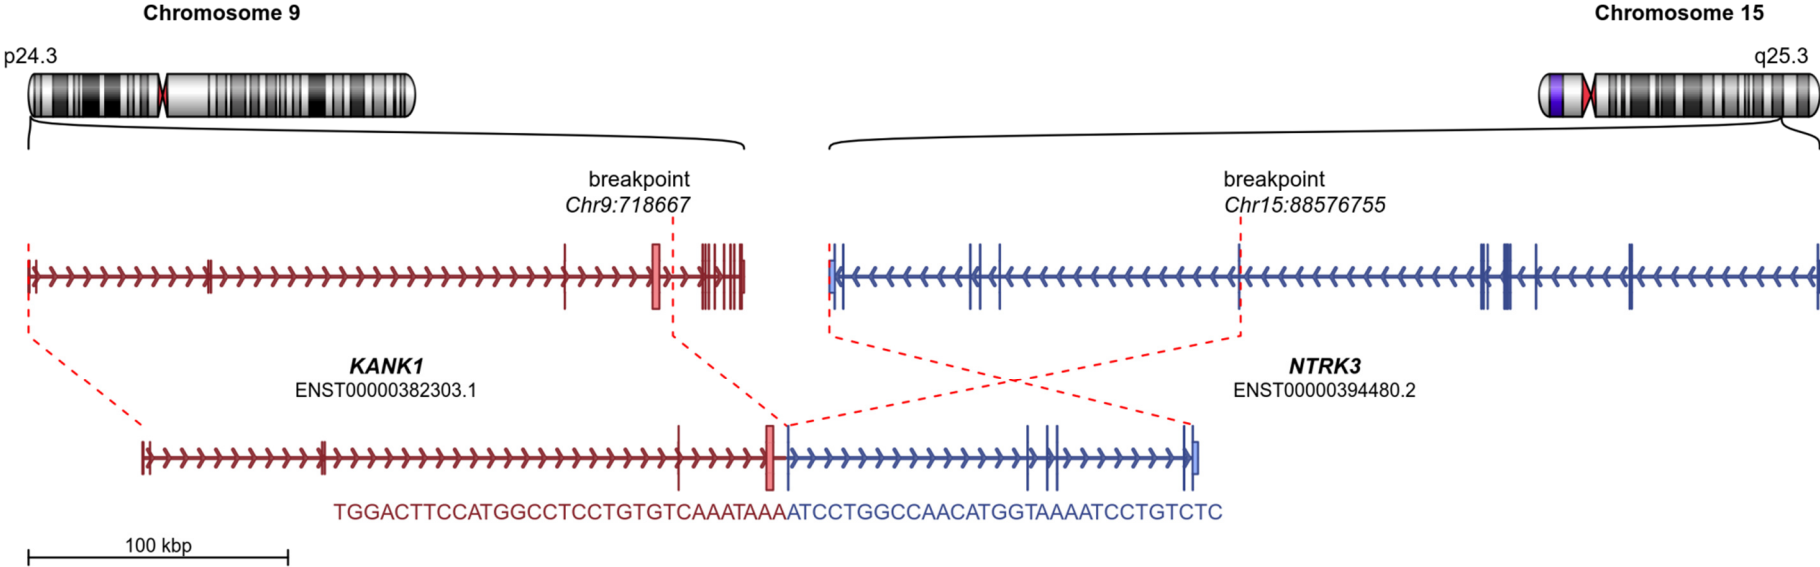

PCSI\_0305 (EGAF00001556446)

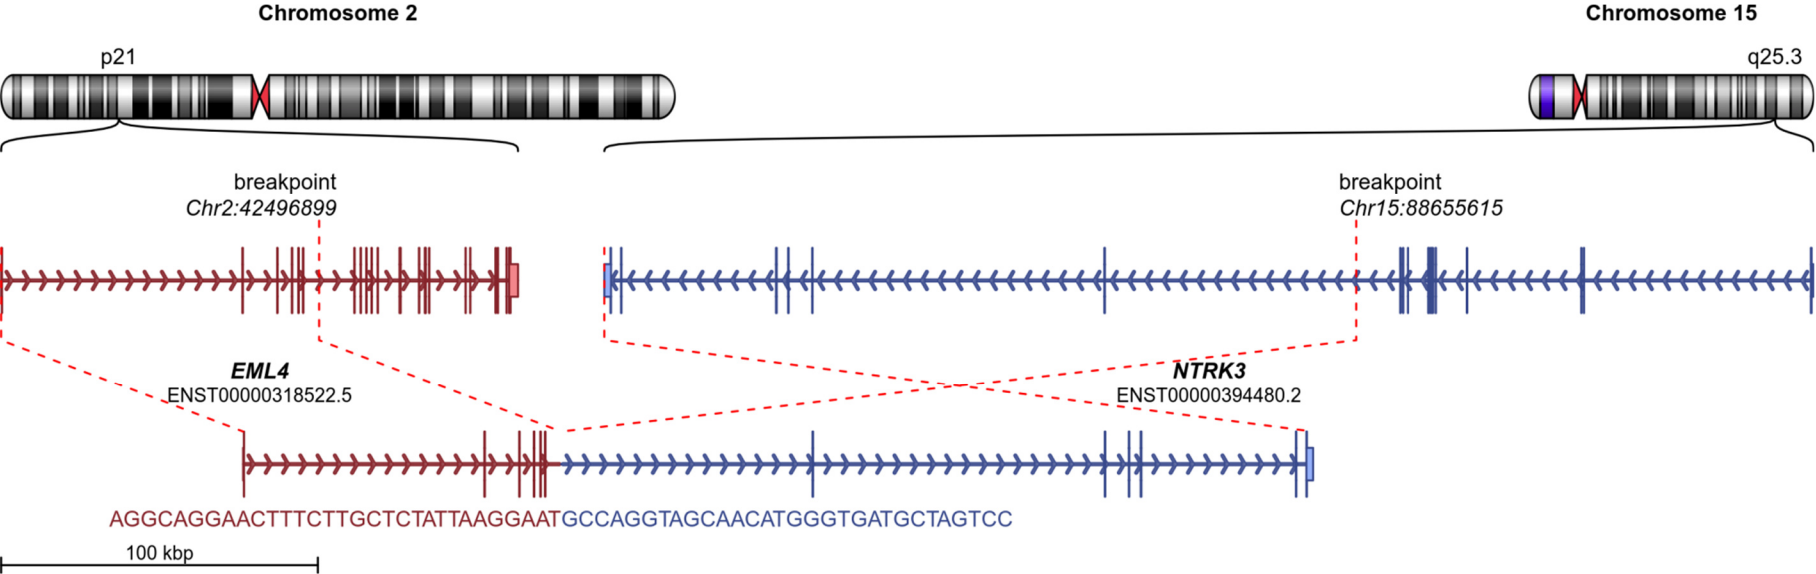

PCSI\_0326 (EGAF00001556521)

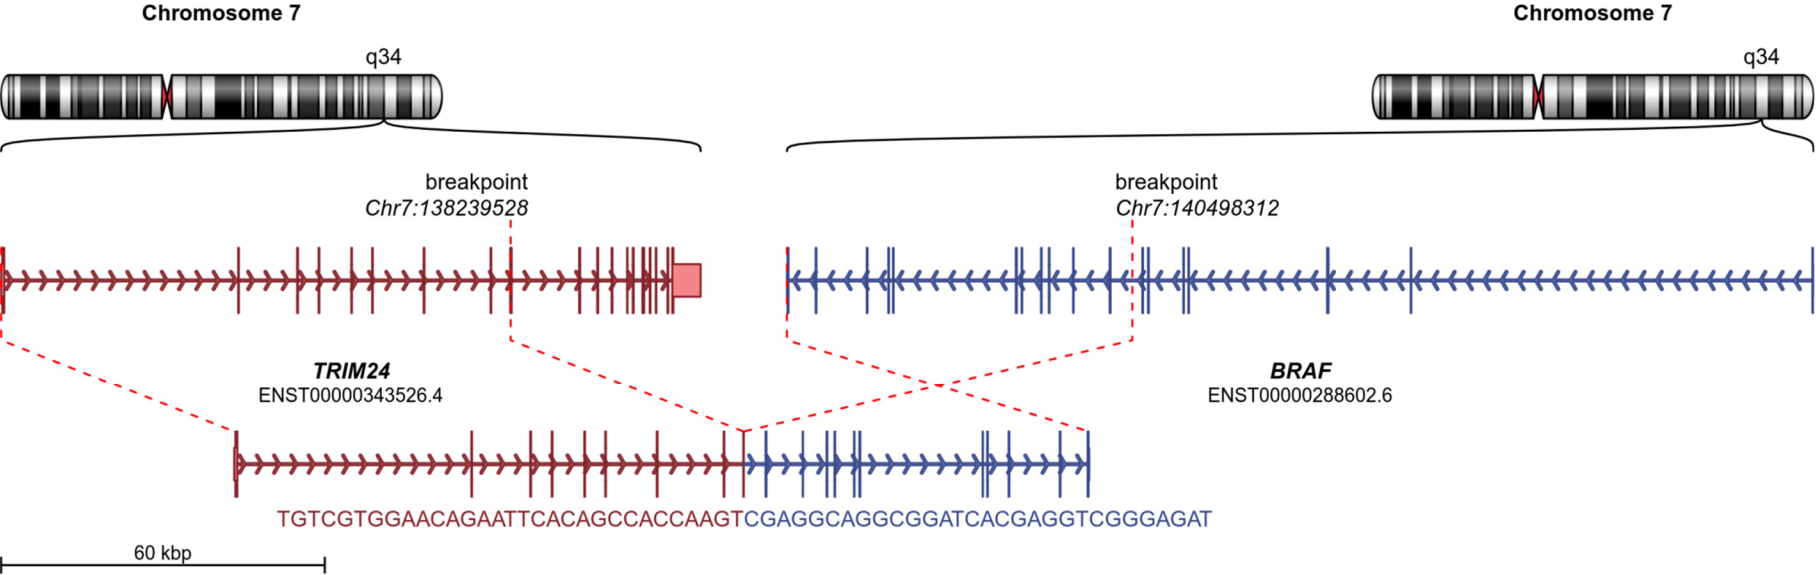

PCSI\_0330 (EGAF00001802818)

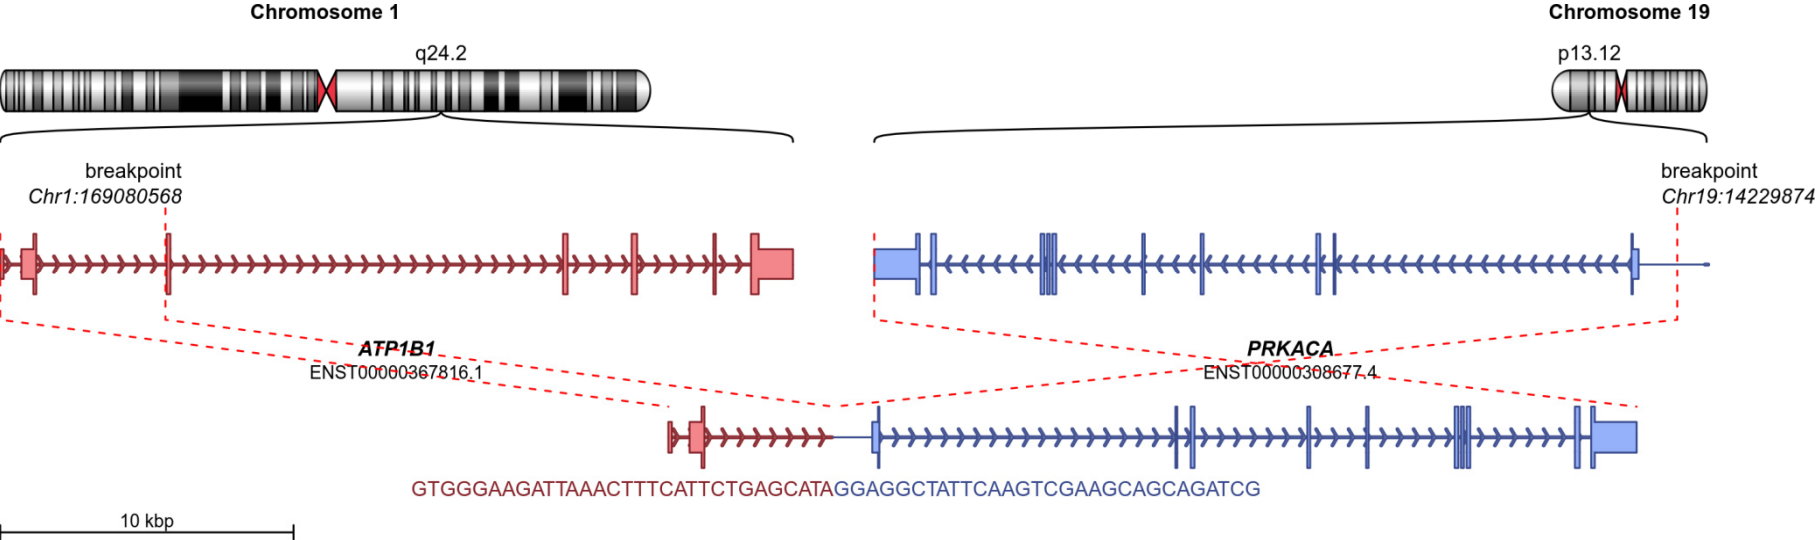

PCSI\_0347 (EGAF00001556815)

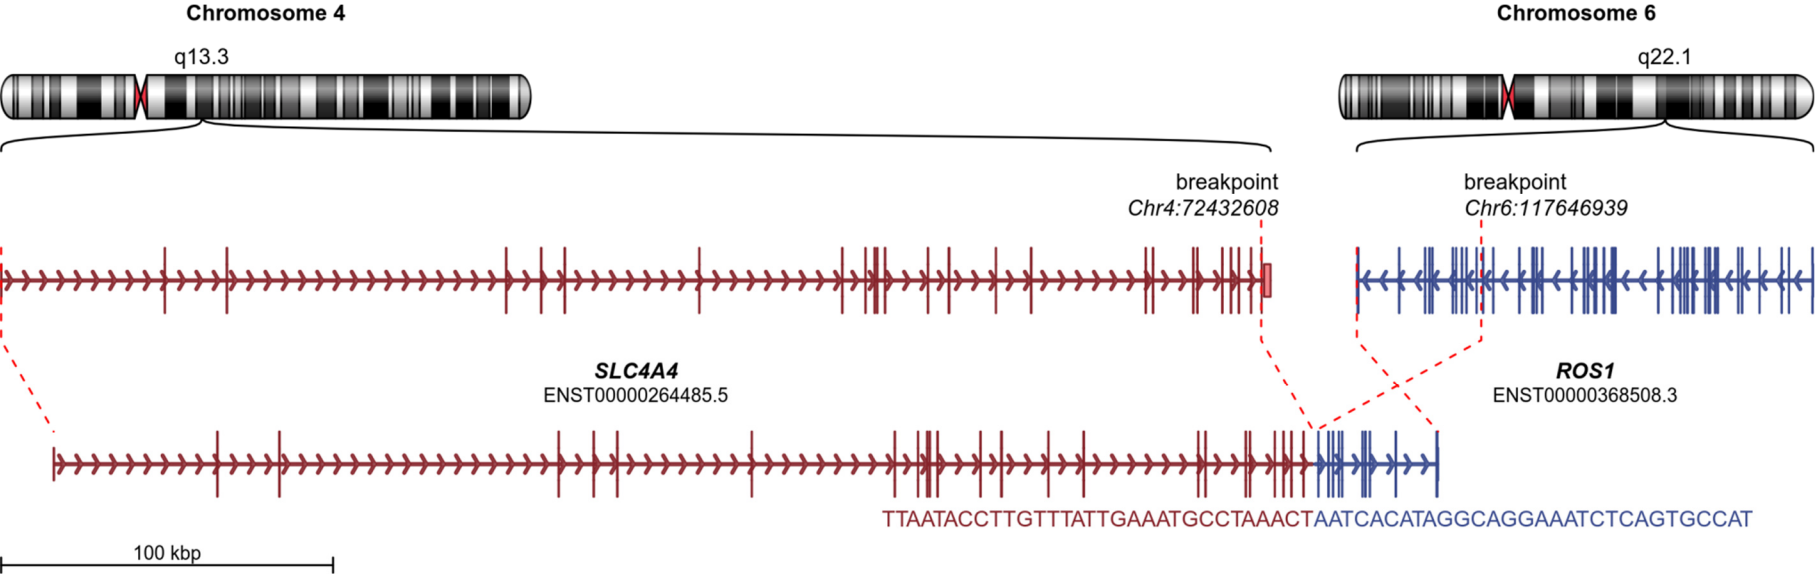

PCSI\_0458 (EGAF00001556509)

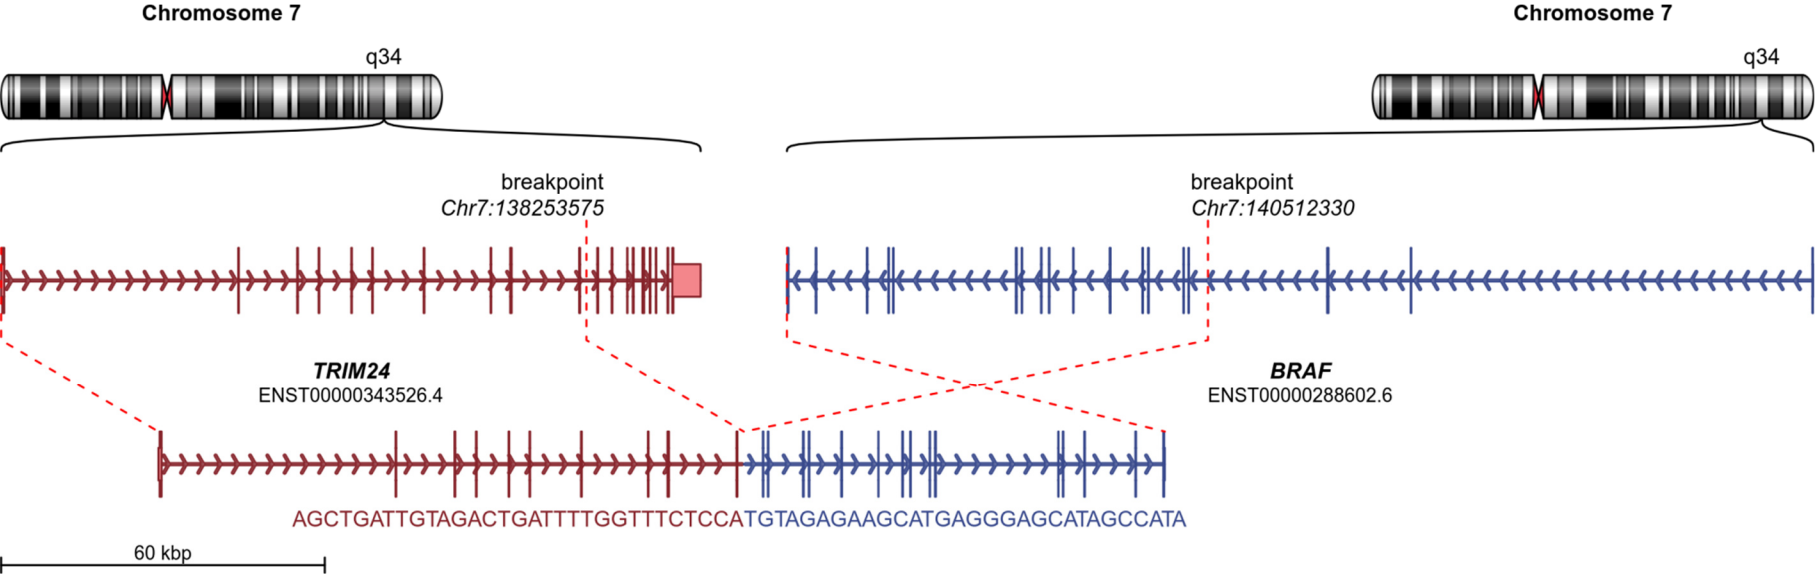



PCSI\_0572 (EGAF00001556614)

Chromosome 14

q32.32

Chromosome 2

p23.2

breakpoint  
Chr14:103418480

breakpoint  
Chr2:29446630

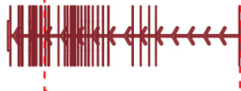

**CDC42BPB**  
ENST00000381246.2

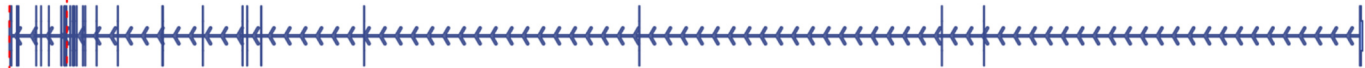

**ALK**  
ENST00000389048.3

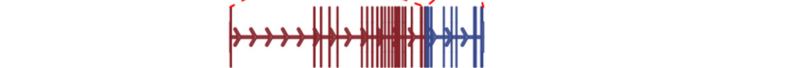

GATCTCACTTTGTTTCCCAGACTGGTCTCAATACAAATAATTATTTCCATATATCTGATT

200 kbp

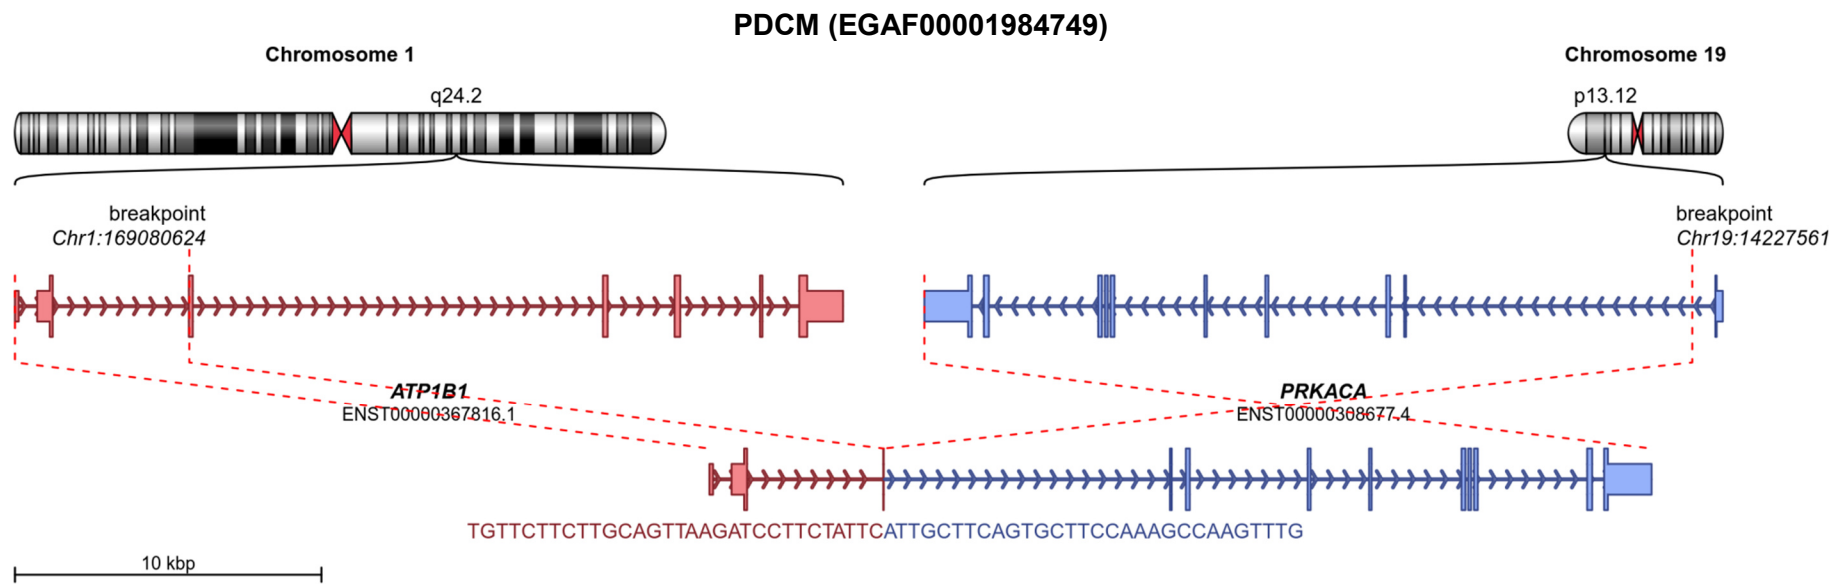

**Supplemental Figure S7: Structural variants correlating with the putative driver fusions in Supplemental Figure S6.**  
Structural variants were identified by SOPHIA in matched whole-genome sequencing samples.
