# Supplementary material for: Accurate and efficient detection of gene fusions from RNA sequencing data
Source: PubMed Central journal article supplement (PMC7919457; doi:10.1101/gr.257246.119), 2021-03
Supplement: supp_gr.257246.119_Supplemental_Figure_S9.pdf [file supp_gr.257246.119_Supplemental_Figure_S9.pdf]

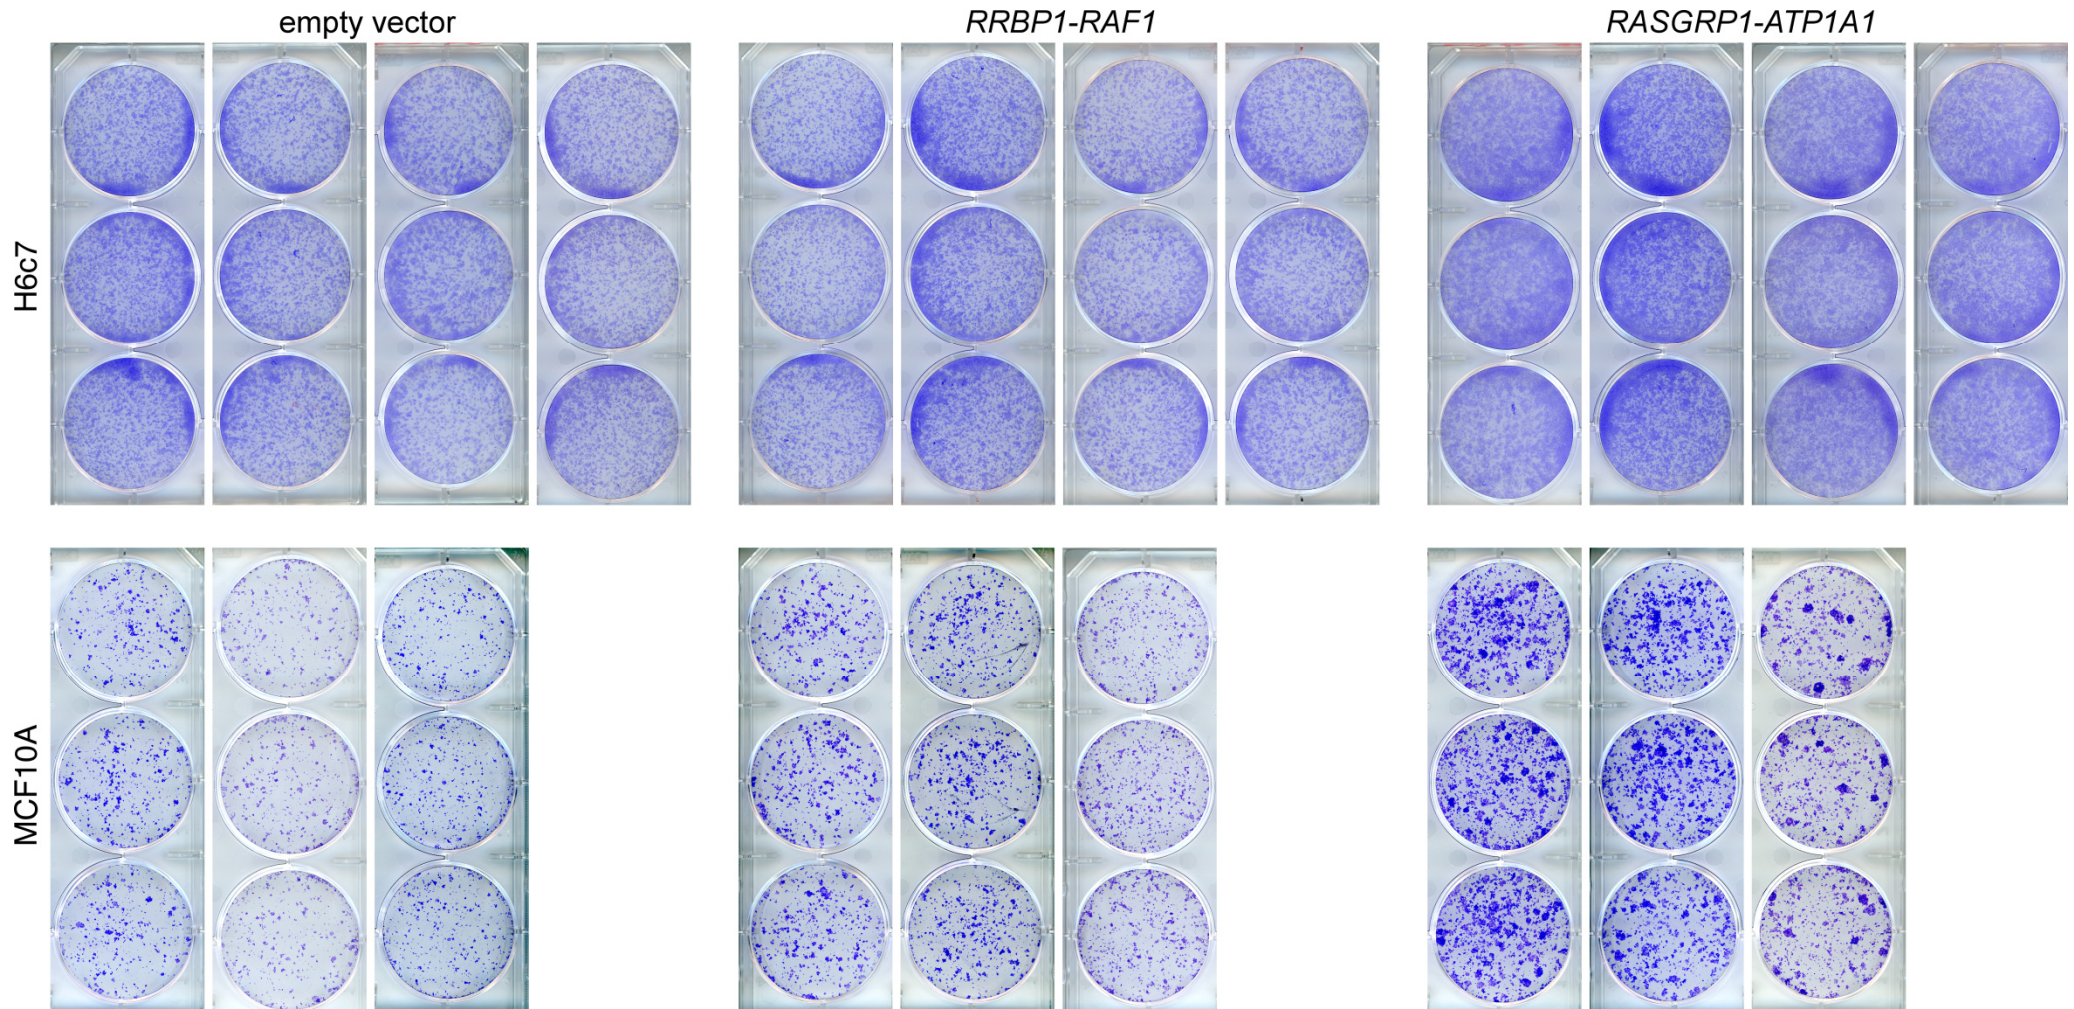

**Supplemental Figure S9: Colony formation of H6c7 cells and MCF10A cells transduced with fusion constructs.**

H6c7 and *TP53*-deficient MCF10A cells stably transduced with the fusions or empty vector were cultured for 7 days with EGF and 8 days without EGF, respectively.
