# Supplementary material for: Accurate and efficient detection of gene fusions from RNA sequencing data
Source: PubMed Central journal article supplement (PMC7919457; doi:10.1101/gr.257246.119), 2021-03
Supplement: supp_gr.257246.119_Supplemental_Figure_S11.pdf [file supp_gr.257246.119_Supplemental_Figure_S11.pdf]

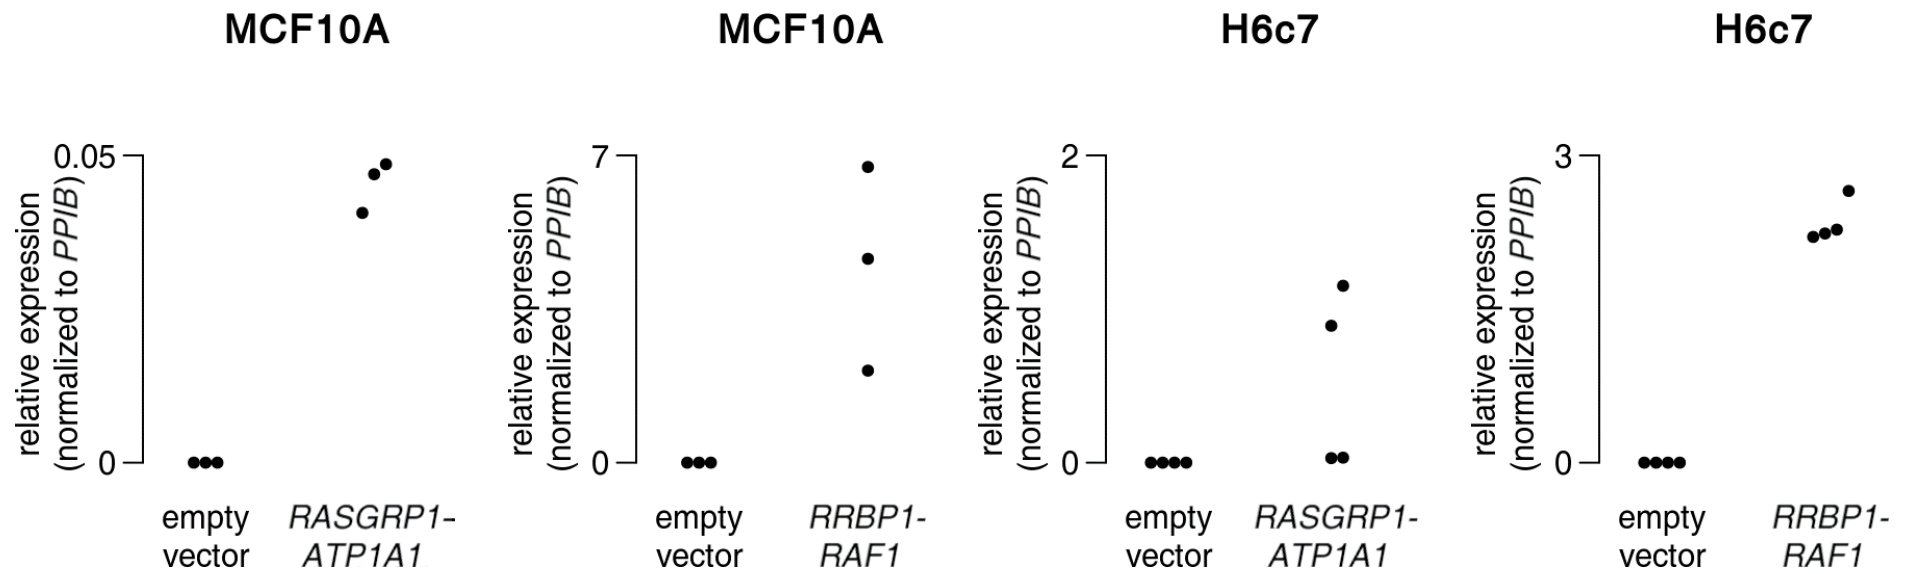

**Supplemental Figure S11: mRNA expression of fusions measured by qPCR.**

Expression of the fusions in MCF10A and H6c7 cells was determined by qPCR. The expression levels were normalized to the house-keeping gene *PPIB*.
