# Supplementary material for: Accurate and efficient detection of gene fusions from RNA sequencing data
Source: Genome Res. 2021 Mar;31(3):448–60. doi: 10.1101/gr.257246.119 (PMC7919457; doi:10.1101/gr.257246.119)
Supplement: Supplemental Material [file supp_gr.257246.119_Supplemental_Table_S1.xlsx]

## Sheet: S1 Benchmark datasets
Supplemental Table S1: Benchmark datasets. The performance of the fusion detection tools was evaluated on a range of datasets, including simulated data, spike-ins of synthetic fusions, and cell lines.
Source	Sample name	Accession	Read count	Read length
Jia et al.	simulated 5x	N/A	39512214	75
	simulated 10x	N/A	39538216	75
	simulated 20x	N/A	39592220	75
	simulated 30x	N/A	39646210	75
	simulated 50x	N/A	39752226	75
	simulated 80x	N/A	39912214	75
	simulated 100x	N/A	40020218	75
	simulated 150x	N/A	40288216	75
	simulated 200x	N/A	40554194	75
Tembe et al. SRP043081	spike-in 10^-8.57 pMol	SRR1548811	153940150	101
	spike-in 10^-8.57 pMol	SRR1544075	204196782	101
	spike-in 10^-7.17 pMol	SRR1659967	194331838	101
	spike-in 10^-7.17 pMol	SRR1659958	275542430	101
	spike-in 10^-6.87 pMol	SRR1659966	174973290	101
	spike-in 10^-6.87 pMol	SRR1659957	286845992	101
	spike-in 10^-6.57 pMol	SRR1659965	218406492	101
	spike-in 10^-6.57 pMol	SRR1659956	191426016	101
	spike-in 10^-6.17 pMol	SRR1659964	187734378	101
	spike-in 10^-6.17 pMol	SRR1659955	245619156	101
	spike-in 10^-5.87 pMol	SRR1659968	253523684	101
	spike-in 10^-5.87 pMol	SRR1659959	145108286	101
	spike-in 10^-5.57 pMol	SRR1659963	222955414	101
	spike-in 10^-5.57 pMol	SRR1659954	197203230	101
	spike-in 10^-4.87 pMol	SRR1659962	212916422	101
	spike-in 10^-4.87 pMol	SRR1659953	218214814	101
	spike-in 10^-4.17 pMol	SRR1659961	199528406	101
	spike-in 10^-4.17 pMol	SRR1659952	203541704	101
	spike-in 10^-3.47 pMol	SRR1659960	360163732	101
	spike-in 10^-3.47 pMol	SRR1659951	347430796	101
Lin et al. ERP004151	MCF-7	ERR358487	147949532	101
	MCF-7	ERR358488	179732516	101
ENCODE Project SRP007461	MCF-7	SRR534293	296875592	101
	MCF-7	SRR534294	283454234	101
Edgren et al. SRP003186	MCF-7	SRR064286	16824862	50
	KPL-4	SRR064287	13600332	50
	BT-474	SRR064438	27030264	50
	BT-474	SRR064439	15830764	50
	SK-BR-3	SRR064440	18096704	50
	SK-BR-3	SRR064441	18194304	50
