# Supplementary material for: Accurate and efficient detection of gene fusions from RNA sequencing data
Source: Genome Res. 2021 Mar;31(3):448–60. doi: 10.1101/gr.257246.119 (PMC7919457; doi:10.1101/gr.257246.119)
Supplement: Supplemental Material [file supp_gr.257246.119_Supplemental_Table_S2.xlsx]

## Sheet: S2A ICGC-EOPC
Supplemental Table S2A: Recall of TMPRSS2-ERG fusions in the ICGC early-onset prostate cancer (EOPC) cohort. ¹FusionCatcher failed to detect this fusion when its whitelist was disabled (parameter --skip-known-fusions).
Donor	Accession(s)	Fusion	Arriba	deFuse	FusionCatcher	InFusion	PRADA	SOAPfuse	STAR-Fusion
ICGC_PCA001	EGAF00002395009, EGAF00002395010	-
ICGC_PCA002	EGAF00002395011, EGAF00002395012	-
ICGC_PCA003	EGAF00002395013, EGAF00002395014	-
ICGC_PCA004	EGAF00002395015, EGAF00002395016	TMPRSS2-ERG	found	found	found	found	found	found	found
ICGC_PCA005	EGAF00002395017, EGAF00002395018	TMPRSS2-ERG	found	found	found	found	found	found	found
ICGC_PCA006	EGAF00002395028, EGAF00002395027	TMPRSS2-ERG	found	found	found	missed	missed	found	found
ICGC_PCA007	EGAF00002395021, EGAF00002395022	TMPRSS2-ERG	found	found	found	found	found	found	found
ICGC_PCA008	EGAF00002395020, EGAF00002395019	TMPRSS2-ERG	found	found	found	missed	found	found	found
ICGC_PCA009	EGAF00002395025, EGAF00002395026	TMPRSS2-ERG	found	found	found	found	found	found	found
ICGC_PCA010	EGAF00002395024, EGAF00002395023	-
ICGC_PCA011	EGAF00002395030, EGAF00002395029	TMPRSS2-ERG	found	found	found	found	found	found	found
ICGC_PCA012	EGAF00002395031, EGAF00002395032	TMPRSS2-ERG	found	found	found	found	found	found	found
ICGC_PCA014	EGAF00002395033, EGAF00002395034	TMPRSS2-ERG	found	found	found	found	found	found	found
ICGC_PCA015	EGAF00002395035, EGAF00002395036	TMPRSS2-ERG	found	found	found	found	found	found	found
ICGC_PCA021	EGAF00002395037, EGAF00002395038	-
ICGC_PCA024	EGAF00002395039, EGAF00002395040	TMPRSS2-ERG	found	found	found	found	missed	found	found
ICGC_PCA025	EGAF00002395041, EGAF00002395042	TMPRSS2-ERG	found	found	found	found	found	found	found
ICGC_PCA026	EGAF00002395043, EGAF00002395044	TMPRSS2-ERG	found	found	found	found	found	found	found
ICGC_PCA027	EGAF00002395045, EGAF00002395046	TMPRSS2-ERG	found	found	found	found	found	found	found
ICGC_PCA028	EGAF00002395047, EGAF00002395048	TMPRSS2-ERG	found	found	found	found	found	found	found
ICGC_PCA030	EGAF00002395049, EGAF00002395050	-
ICGC_PCA031	EGAF00002395051, EGAF00002395052	TMPRSS2-ERG	found	found	found	found	found	found	found
ICGC_PCA032	EGAF00002395053, EGAF00002395054	TMPRSS2-ERG	missed	found	found¹	missed	missed	missed	missed
ICGC_PCA033	EGAF00002395055, EGAF00002395056	TMPRSS2-ERG	found	found	found	found	found	found	missed
ICGC_PCA034	EGAF00002395057, EGAF00002395058	-
ICGC_PCA035	EGAF00002395069, EGAF00002395070	TMPRSS2-ERG	found	found	found	found	found	found	found
ICGC_PCA037	EGAF00002395081, EGAF00002395082	TMPRSS2-ERG	found	found	found	found	found	found	found
ICGC_PCA038	EGAF00002395087, EGAF00002395088	TMPRSS2-ERG	found	found	found	found	found	found	found
ICGC_PCA039	EGAF00002395101, EGAF00002395102	TMPRSS2-ERG	found	found	found	found	found	found	found
ICGC_PCA041	EGAF00002395103, EGAF00002395104	-
ICGC_PCA042	EGAF00002395113, EGAF00002395114	-
ICGC_PCA043	EGAF00002395115, EGAF00002395116	TMPRSS2-ERG	found	found	found	found	found	found	found
ICGC_PCA044	EGAF00002395117, EGAF00002395118	-
ICGC_PCA045	EGAF00002395123, EGAF00002395124	-
ICGC_PCA049	EGAF00002395125, EGAF00002395126	TMPRSS2-ERG	found	found	found	found	found	found	found
ICGC_PCA056	EGAF00002395127, EGAF00002395128	TMPRSS2-ERG	found	found	found	found	found	found	found
ICGC_PCA057	EGAF00002395129, EGAF00002395130	-
ICGC_PCA058	EGAF00002395131, EGAF00002395132	-
ICGC_PCA059	EGAF00002395133, EGAF00002395134	TMPRSS2-ERG	found	found	found	found	found	found	found
ICGC_PCA060	EGAF00002395135, EGAF00002395136	-
ICGC_PCA061	EGAF00002395137, EGAF00002395138	TMPRSS2-ERG	found	found	found	found	found	found	found
ICGC_PCA062	EGAF00002395139, EGAF00002395140	TMPRSS2-ERG	found	found	found	found	found	found	found
ICGC_PCA064	EGAF00002395141, EGAF00002395142	-
ICGC_PCA069	EGAF00002395143, EGAF00002395144	TMPRSS2-ERG	found	found	found	found	found	found	found
ICGC_PCA070	EGAF00002395145, EGAF00002395146	TMPRSS2-ERG	found	found	found	found	found	found	found
ICGC_PCA071	EGAF00002395147, EGAF00002395148	-
ICGC_PCA072	EGAF00002395149, EGAF00002395150	-
ICGC_PCA084	EGAF00002395151, EGAF00002395152	TMPRSS2-ERG	found	found	found	missed	found	found	found
ICGC_PCA090	EGAF00002395153, EGAF00002395154	-
ICGC_PCA091	EGAF00002395155, EGAF00002395156	TMPRSS2-ERG	found	missed	found	found	missed	found	found
ICGC_PCA092	EGAF00002395157, EGAF00002395158	-
ICGC_PCA093	EGAF00002395159, EGAF00002395160	TMPRSS2-ERG	found	found	found	found	found	found	found
ICGC_PCA094	EGAF00002395161, EGAF00002395162	-
ICGC_PCA095	EGAF00002395163, EGAF00002395164	-
ICGC_PCA096	EGAF00002395165, EGAF00002395166, EGAF00002395167, EGAF00002395168	TMPRSS2-ERG	found	found	found	missed	found	found	found
ICGC_PCA098	EGAF00002395169, EGAF00002395170	TMPRSS2-ERG	found	missed	found	found	found	found	found
ICGC_PCA099	EGAF00002395171, EGAF00002395172	-
ICGC_PCA100	EGAF00002395173, EGAF00002395174	-
ICGC_PCA105	EGAF00002395175, EGAF00002395176	-
ICGC_PCA106	EGAF00002395177, EGAF00002395178	TMPRSS2-ERG	found	found	found	found	found	found	found
ICGC_PCA109	EGAF00002395179, EGAF00002395180	-
ICGC_PCA110	EGAF00002395181, EGAF00002395182	-
ICGC_PCA111	EGAF00002395183, EGAF00002395184	TMPRSS2-ERG	found	found	found	found	found	found	found
ICGC_PCA112	EGAF00002395185, EGAF00002395186	-
ICGC_PCA113	EGAF00002395187, EGAF00002395188	-
ICGC_PCA115	EGAF00002395189, EGAF00002395190	-
ICGC_PCA116	EGAF00002395191, EGAF00002395192	TMPRSS2-ERG	found	found	found	found	found	found	found
ICGC_PCA118	EGAF00002395193, EGAF00002395194	-
ICGC_PCA124	EGAF00002395195, EGAF00002395196	TMPRSS2-ERG	found	found	found	found	found	found	found
ICGC_PCA125	EGAF00002395197, EGAF00002395198	-
ICGC_PCA127	EGAF00002395199, EGAF00002395200	TMPRSS2-ERG	found	missed	found	found	found	found	found
ICGC_PCA128	EGAF00002395201, EGAF00002395202	-
ICGC_PCA134	EGAF00002395203, EGAF00002395204	TMPRSS2-ERG	found	found	found	found	found	missed	missed
ICGC_PCA138	EGAF00002395205, EGAF00002395206	TMPRSS2-ERG	found	found	found	found	found	found	found
ICGC_PCA139	EGAF00002395207, EGAF00002395208	-
ICGC_PCA144	EGAF00002395209, EGAF00002395210	TMPRSS2-ERG	found	missed	found	found	found	found	missed
ICGC_PCA145	EGAF00002395211, EGAF00002395212	TMPRSS2-ERG	found	missed	found¹	found	missed	missed	missed
ICGC_PCA146	EGAF00002395213, EGAF00002395214	TMPRSS2-ERG	found	found	found	found	found	found	found
ICGC_PCA148	EGAF00002395215, EGAF00002395216	-
ICGC_PCA155	EGAF00002395217, EGAF00002395218	TMPRSS2-ERG	found	found	found	found	found	found	found
ICGC_PCA156	EGAF00002395219, EGAF00002395220	TMPRSS2-ERG	found	found	found	found	found	found	found
ICGC_PCA158	EGAF00002395221, EGAF00002395222	-
ICGC_PCA159	EGAF00002395223, EGAF00002395224	TMPRSS2-ERG	found	found	found	found	found	found	found
ICGC_PCA161	EGAF00002395225, EGAF00002395226	TMPRSS2-ERG	found	found	found	found	found	found	found
ICGC_PCA162	EGAF00002395227, EGAF00002395228	TMPRSS2-ERG	found	found	missed	missed	missed	missed	missed
ICGC_PCA168	EGAF00002395229, EGAF00002395230	-
ICGC_PCA169	EGAF00002395231, EGAF00002395232	TMPRSS2-ERG	found	missed	found	found	found	found	found
ICGC_PCA170	EGAF00002395233, EGAF00002395234	TMPRSS2-ERG	found	missed	found	found	found	found	found
ICGC_PCA172	EGAF00002395235, EGAF00002395236	TMPRSS2-ERG	found	found	found	found	found	found	found
ICGC_PCA175	EGAF00002395237, EGAF00002395238	-
ICGC_PCA176	EGAF00002395239, EGAF00002395240	TMPRSS2-ERG	found	missed	missed	missed	missed	missed	missed
ICGC_PCA184	EGAF00002395241, EGAF00002395242	TMPRSS2-ERG	found	found	found	found	found	found	found
ICGC_PCA187	EGAF00002395243, EGAF00002395244	TMPRSS2-ERG	found	found	found	found	found	found	found
ICGC_PCA192	EGAF00002395245, EGAF00002395246	-
ICGC_PCA196	EGAF00002395247, EGAF00002395248	-
ICGC_PCA198	EGAF00002395249, EGAF00002395250	-
		Total found:	55	48	54	49	49	51	49

## Sheet: S2B TCGA-DLBC
Supplemental Table S2B: Recall of IG-BCL2/BCL6/MYC fusions in the TCGA diffuse large B cell lymphoma (DLBC) cohort. ¹Arriba only detected this fusion when a list of known / expected fusions was supplied (parameter -k).
Donor	Accession	Fusion	Arriba	deFuse	FusionCatcher	InFusion	PRADA	SOAPfuse	STAR-Fusion
TCGA-FA-8693	c64ff893-508b-4569-880f-bcbd4b7e08c6	-
TCGA-FA-A4BB	2ef2b508-bf51-44b4-85ec-f97b71fb9034	-
TCGA-FA-A4XK	45ab259c-5346-4991-9a47-2907bfe7f51e	-
TCGA-FA-A6HN	5f2d46c5-c135-46a4-bc37-2993d328e3b5	-
TCGA-FA-A6HO	96191413-77f2-4247-b263-ef8a77f89d13	-
TCGA-FA-A7DS	ce3ca9f7-1e65-41c9-84d0-a33d823e8637	-
TCGA-FA-A7Q1	37cc1da7-cc4e-448f-8b4c-ca83d7464232	-
TCGA-FA-A82F	be6484b4-d164-4947-a124-81bb5fa45158	-
TCGA-FA-A86F	893e1ae4-da42-4a3d-840b-44f849521497	-
TCGA-FF-8041	4e957262-e267-44bf-b854-9990ca68c6d7	-
TCGA-FF-8042	2e28cff3-216a-4e49-9710-d5d2f45f6215	-
TCGA-FF-8043	a3a20ce5-a74c-41d7-88f0-8a1ac1142745	-
TCGA-FF-8046	1aa7f0d7-1c8f-4dc8-968f-ad94db4bfd9e	IGH-MYC	found	found	found	found	missed	missed	found
TCGA-FF-8047	75cb958e-670f-4d4a-a8a2-d9b8de2297dd	IGH-BCL6	found	missed	found	found	missed	missed	found
TCGA-FF-8061	5351d27e-2dcd-46cc-afbc-5f1d059e826b	-
TCGA-FF-8062	a1589cfd-ef81-4ff3-af6a-12617395bbd5	-
TCGA-FF-A7CQ	180e2e43-bbe7-4569-a63d-82873b01c7f8	-
TCGA-FF-A7CR	d603bac5-d5bc-4b3b-ae33-03e9fa70dd63	-
TCGA-FF-A7CW	96e62504-a893-4f6f-89c6-939103776789	-
TCGA-FF-A7CX	cb6c96e7-7f17-4e52-9739-53ece42e8898	-
TCGA-FM-8000	3ade1e86-19f6-4951-819b-0c864c56e4b5	IGH-BCL2	found	missed	missed	missed	missed	missed	missed
TCGA-G8-6324	5fe963ca-e434-41fa-b5cd-603807d88577	-
TCGA-G8-6325	15deba77-15f4-4af3-a1f7-878d5acd97b8	-
TCGA-G8-6326	825aca58-954f-47cd-902e-136f53d005fc	-
TCGA-G8-6906	3df400c3-21bc-4356-999b-13fd15a1cf37	IGH-BCL2	found	missed	missed	missed	missed	missed	missed
TCGA-G8-6907	4aa91cf9-9bfa-4422-948f-c00be36b6383	IGH-BCL2	found¹	missed	missed	missed	missed	missed	missed
TCGA-G8-6909	e882e2af-e073-4097-9dac-7c15c68ee123	-
TCGA-G8-6914	590ac1ac-e95d-4d96-bdb0-f4f30bd6d078	-
TCGA-GR-7351	5ea946e8-68e3-4805-aead-f7a93c9fecaa	-
TCGA-GR-7353	7a1471f5-c86a-4ebc-97fb-d62b41a690ff	-
TCGA-GR-A4D4	c890dcb6-d3fd-4dd8-bfdf-ad8a143781c5	-
TCGA-GR-A4D5	876f677c-74df-4bdb-bc65-250248c56d2a	IGL-BCL6	found	found	missed	found	missed	missed	missed
TCGA-GR-A4D6	46618636-2ff6-4f7d-a40b-5549d15ac575	-
TCGA-GR-A4D9	df9dbdd7-9f38-4ccb-9d70-c88754771766	-
TCGA-GS-A9TQ	060a1227-3002-4a79-a94b-353620131377	IGH-BCL2	found	missed	missed	missed	missed	missed	missed
TCGA-GS-A9TT	45463b7c-3817-41da-9e1d-aac153faae07	-
TCGA-GS-A9TU	2246051d-af05-45c9-95ac-c1ee7bdb3f0c	-
TCGA-GS-A9TV	831363ae-f91b-497f-857a-bd9ac9772b37	-
TCGA-GS-A9TW	83e80786-cf95-4373-befa-344d036ae5bf	-
TCGA-GS-A9TX	814e57f2-5e21-4c5f-a03e-82a468ca96bf	-
TCGA-GS-A9TY	23bf921d-c4e4-458e-aba7-3384d178334d	IGH-BCL6	found	missed	missed	found	missed	missed	found
TCGA-GS-A9TZ	57a136dd-ead1-46fd-ad39-2eb4ae210c4a	-
TCGA-GS-A9U3	4ccab227-bda2-495d-86b6-47a6f359a443	-
TCGA-GS-A9U4	5ee2b314-52bd-44c8-8387-00d201d10b17	-
TCGA-RQ-A68N	116af6e7-a7b3-4fa0-968f-93e6549bd0dc	-
TCGA-RQ-A6JB	dbc1dabd-11dc-46db-8114-367d248cffd6	-
TCGA-RQ-AAAT	12fa76d0-f820-4a87-a84a-495ac9966e05	-
TCGA-VB-A8QN	e77a06e6-50c6-428e-a32e-61e82c1ad0b9	IGH-BCL6	found	missed	found	found	missed	missed	found
		Total found:	9	2	3	5	0	0	4
