# Supplementary material for: Accurate and efficient detection of gene fusions from RNA sequencing data
Source: Genome Res. 2021 Mar;31(3):448–60. doi: 10.1101/gr.257246.119 (PMC7919457; doi:10.1101/gr.257246.119)
Supplement: Supplemental Material [file supp_gr.257246.119_Supplemental_Table_S3.xlsx]

## Sheet: S3 Validation of novel fusions
Supplemental Table S3: Validation of novel fusion predictions from the MCF-7 cancer cell line. For each fusion detection method, we subjected the top yet unconfirmed predictions from the MCF-7 cell line to experimental validation using Sanger sequencing. PCR, polymerase chain reaction; M, 50 bp marker; P1, first primer pair; P2, second primer pair
5' gene	3' gene	Fusion gene predicted by	5' breakpoint	3' breakpoint	3' primer 1	5' primer 1	3' primer 2	5' primer 2	Validation result	Sanger sequencing chromatogram	PCR product
SULF2	ZNF217	Arriba (ERR358487, ERR358488, SRR064286, SRR534293, SRR534294) deFuse (ERR358487, ERR358488, SRR064286, SRR534293, SRR534294) InFusion (ERR358487, ERR358488, SRR064286, SRR534293, SRR534294)	Chr20:46415147	Chr20:52210645	CAAATGTGTGTGGCTGGAGG	GCTGCTCCCTGAACACTTTC	GCAAATGTGTGTGGCTGG	AGCTGCTCCCTGAACACT	negative (PCR yielded a product with unspecific sequence and no homology to the predicted fusion sequence)	not available
NCOA3	ZNF217	Arriba (ERR358487, ERR358488, SRR534293, SRR534294) deFuse (SRR534293, SRR534294) InFusion (ERR358487, ERR358488, SRR534293, SRR534294)	Chr20:46266527	Chr20:52224820	TCTGGGGACTAAGCAACAGG	CTTGCTTTGTCTACACGGGG	GGGGACTAAGCAACAGGTGT	TGCCCAGCTCAAGGTATACT	negative (PCR yielded a product with unspecific sequence and no homology to the predicted fusion sequence)	not available
AC074183.4	SNHG7	deFuse (ERR358488, SRR534293, SRR534294)	Chr7:84569064	Chr9:139618452	AGTGTGAGCTGTGATGGACT	TTCCAGCACCACAGACATGA	ACTTCGCCTGTGATGGACTC	CAAAGGCGGACATGGACATC	negative (base marked by red arrow in Sanger sequencing chromatogram identifies predicted fusion transcript as ordinary splice variant between exons 4 and 5 of SNHG7)
Z97634.5	NME4	deFuse (ERR358487, ERR358488, SRR534293, SRR534294)	Chr16:433429	Chr16:448990	CCCCGACTTGTCCACTGAA	CTCTCAAAGCGCTGGATCAC	GATGTGGGAGCCTCGTGG	CAAAGCGCTGGATCACGTC	positive
EEF1D	NAPRT	deFuse (ERR358488, SRR534293, SRR534294) FusionCatcher (ERR358487, ERR358488, SRR534293, SRR534294) SOAPfuse (ERR358488, SRR534293, SRR534294)	Chr8:144661949	Chr8:144660113	TTGCTGGAGGAGGAGATCAC	GTCACCTCGGAGCAGTCG	GACTTGCTGGAGGAGGAGAT	GCAGAGCAGCGGTGTCTC	positive
C19ORF60	TMEM59L	Arriba (ERR358487, SRR534294) deFuse (ERR358487, ERR358488, SRR534293, SRR534294) FusionCatcher (ERR358487, ERR358488, SRR534293, SRR534294) InFusion (ERR358487, ERR358488, SRR534293, SRR534294) SOAPfuse (ERR358487, ERR358488, SRR534293, SRR534294)	Chr19:18699710	Chr19:18724682	AGTCATGATCACCGAGACCG	CAAGCGCTGATCAGAACGG	CGCAGTCATGATCACCGAGA	TCGGCAGATGGAGAAGAGG	positive
AC009053.1	PDPR	PRADA (ERR358487, ERR358488, SRR534293, SRR534294)	Chr16:74385938	Chr16:70165205	not available	not available	not available	not available	not available (impossible to design primers due to sequence identity of AC009053.1 and PDPR)	not available	not available
RP11-419C5.2	PDXDC1	PRADA (ERR358487, SRR534293, SRR534294)	Chr16:70051950	Chr16:15122735	not available	not available	not available	not available	not available (impossible to design primers due to sequence identity of RP11-419C5.2 and PDXDC1)	not available	not available
SMG5	PAQR6	deFuse (ERR358487, ERR358488, SRR534293, SRR534294) SOAPfuse (ERR358487, ERR358488, SRR534293, SRR534294)	Chr1:156219360	Chr1:156216547	TCCTTGAAGCTGCTCAGTCA	CTTGAAGAAGTTGGGGCAGC	CGTCCCTCCTTTTGCCTTC	AGCCAGACATGATGCCATCT	positive
TIMM23	PARGP1	STAR-Fusion (ERR358487, ERR358488, SRR064286, SRR534293, SRR534294)	Chr10:51606988	Chr10:51732772	TAGCAGCTGGAACCATGACA	GCTGGGATTGACACACCTCT	CACGAGGTGCAGAAGATGAC	CAGACAGCAGCACACAGAAT	negative (base marked by red arrow in Sanger sequencing chromatogram identifies predicted fusion transcript to originate from TIMM23B rather than PARGP1)
GATSL2	GTF2I	deFuse (ERR358487) STAR-Fusion (ERR358487, ERR358488, SRR534293, SRR534294)	Chr7:74867229	Chr7:74143124	GAGTATCCCGCTGTTCACCT	GGTAGCTCATTGGCCTTTGG	GAGTATCCCGCTGTTCACCT	AACTCCCTCACTTTCCGCTT	positive
