# Supplementary material for: Accurate and efficient detection of gene fusions from RNA sequencing data
Source: Genome Res. 2021 Mar;31(3):448–60. doi: 10.1101/gr.257246.119 (PMC7919457; doi:10.1101/gr.257246.119)
Supplement: Supplemental Material [file supp_gr.257246.119_Supplemental_Table_S4.xlsx]

## Sheet: S4A Arriba
Supplemental Table S4A: Raw output of Arriba on all benchmark datasets and validation results.
sample	validation_result	#gene1	gene2	strand1(gene/fusion)	strand2(gene/fusion)	breakpoint1	breakpoint2	site1	site2	type	direction1	direction2	split_reads1	split_reads2	discordant_mates	coverage1	coverage2	confidence	closest_genomic_breakpoint1	closest_genomic_breakpoint2	filters	fusion_transcript	reading_frame	peptide_sequence	read_identifiers
BT-474 (SRR064438)	validated	THRA	AC090627.1	+/+	+/+	17:38243106	17:46371709	splice-site	exon	deletion	downstream	upstream	20	17	42	133	56	high	.	.	duplicates(9),mismatches(4)	.	.	.	.
BT-474 (SRR064438)	duplicate	THRA	AC090627.1	+/+	+/+	17:38243106	17:46384693	splice-site	splice-site	deletion	downstream	upstream	11	3	5	133	148	high	.	.	duplicates(1)	.	.	.	.
BT-474 (SRR064438)	validated	RPS6KB1	SNF8	+/+	-/-	17:57970686	17:47021337	splice-site	splice-site	inversion	downstream	downstream	10	5	20	100	297	high	.	.	duplicates(1),mismatches(5)	.	.	.	.
BT-474 (SRR064438)	duplicate	RPS6KB1	SNF8	+/+	-/-	17:57971285	17:47021337	splice-site	splice-site	inversion	downstream	downstream	1	0	20	5	297	high	.	.	.	.	.	.	.
BT-474 (SRR064438)	validated	TOB1	SYNRG	-/-	-/-	17:48943419	17:35880751	splice-site	splice-site	deletion	upstream	downstream	8	2	20	144	62	high	.	.	low_entropy(1)	.	.	.	.
BT-474 (SRR064438)	validated	VAPB	IKZF3	+/+	-/-	20:56964573	17:37934020	splice-site	splice-site	translocation	downstream	downstream	4	4	13	196	22	high	.	.	.	.	.	.	.
BT-474 (SRR064438)	duplicate	VAPB	IKZF3	+/+	-/-	20:56964573	17:37944627	splice-site	splice-site	translocation	downstream	downstream	1	0	16	196	3	high	.	.	.	.	.	.	.
BT-474 (SRR064438)	validated	ZMYND8	CEP250	-/-	+/+	20:45852970	20:34078463	splice-site	splice-site	inversion	upstream	upstream	0	3	14	60	24	high	.	.	.	.	.	.	.
BT-474 (SRR064438)	validated	STX16	RAE1	+/+	+/+	20:57234690	20:55929088	splice-site	splice-site	duplication	downstream	upstream	0	0	15	30	307	high	.	.	mismappers(1)	.	.	.	.
BT-474 (SRR064438)	duplicate	STX16	RAE1	+/+	+/+	20:57227143	20:55929088	splice-site	splice-site	duplication	downstream	upstream	0	2	12	120	307	high	.	.	mismatches(2)	.	.	.	.
BT-474 (SRR064438)	validated	MED1	ACSF2	-/-	+/+	17:37595418	17:48548389	splice-site	splice-site	inversion	upstream	upstream	3	5	7	177	144	high	.	.	.	.	.	.	.
BT-474 (SRR064438)	validated	AHCTF1	NAAA	-/-	-/-	1:247094880	4:76846964	splice-site	splice-site	translocation	upstream	downstream	1	2	9	28	38	high	.	.	.	.	.	.	.
BT-474 (SRR064438)	duplicate	AHCTF1	NAAA	-/-	-/-	1:247094431	4:76846964	splice-site	splice-site	translocation	upstream	downstream	0	1	10	0	38	high	.	.	.	.	.	.	.
BT-474 (SRR064438)	validated	RAB22A	MYO9B	+/+	+/+	20:56886178	19:17256207	splice-site	splice-site	translocation	downstream	upstream	0	4	5	60	24	high	.	.	low_entropy(1),mismatches(2)	.	.	.	.
BT-474 (SRR064438)	validated	ACACA	STAC2	-/-	-/-	17:35479453	17:37374426	splice-site	splice-site	duplication	upstream	downstream	5	1	3	138	35	high	.	.	low_entropy(1),mismatches(1)	.	.	.	.
BT-474 (SRR064438)	validated	MED1	STXBP4	-/-	+/+	17:37607291	17:53218671	splice-site	splice-site	inversion	upstream	upstream	2	0	7	159	24	high	.	.	.	.	.	.	.
BT-474 (SRR064438)	non-validated	PPP6R3	SHANK2	+/+	-/+	11:68228295	11:70803334	splice-site	intron	deletion/5'-5'	downstream	upstream	2	1	5	41	2	high	.	.	.	.	.	.	.
BT-474 (SRR064438)	non-validated	PTRH2	BCAS3	-/-	+/-	17:57784732	17:59315043	splice-site	intron	duplication/5'-5'	upstream	downstream	0	3	3	49	5	high	.	.	.	.	.	.	.
BT-474 (SRR064438)	validated	TRIM37	MYO19	-/-	-/-	17:57161363	17:34863763	splice-site	splice-site	deletion	upstream	downstream	0	1	4	57	55	high	.	.	.	.	.	.	.
BT-474 (SRR064438)	validated	STARD3	DOK5	+/+	+/+	17:37793484	20:53259997	splice-site	splice-site	translocation	downstream	upstream	1	1	3	277	3	high	.	.	mismatches(1)	.	.	.	.
BT-474 (SRR064438)	validated	DIDO1	TTI1	-/-	-/-	20:61569148	20:36634799	splice-site	splice-site	deletion	upstream	downstream	0	1	3	17	16	high	.	.	.	.	.	.	.
BT-474 (SRR064438)	non-validated	CBFA2T2	AL035457.1(82964),AL079339.1(116672)	+/+	./+	20:32207412	20:49877100	splice-site	intergenic	deletion	downstream	upstream	1	0	2	4	2	high	.	.	mismappers(1)	.	.	.	.
BT-474 (SRR064438)	validated	GLB1	CMTM7	-/-	+/+	3:33055548	3:32483332	splice-site	splice-site	inversion	upstream	upstream	1	0	2	14	2	high	.	.	.	.	.	.	.
BT-474 (SRR064438)	duplicate	GLB1	CMTM7	-/-	+/+	3:33055548	3:32490946	splice-site	splice-site	inversion	upstream	upstream	0	1	0	14	3	medium	.	.	.	.	.	.	.
BT-474 (SRR064438)	non-validated	GABRB3	RYR3	-/-	+/+	15:26790011	15:33920672	3'UTR	splice-site	inversion	upstream	upstream	2	0	1	3	0	high	.	.	.	.	.	.	.
BT-474 (SRR064438)	non-validated	ASTN2	RP11-281A20.1	-/-	-/-	9:120053605	9:120632505	splice-site	splice-site	duplication	upstream	downstream	1	1	1	1	3	high	.	.	.	.	.	.	.
BT-474 (SRR064438)	non-validated	SCARB2	RP11-435P24.2(12781),RP11-435P24.3(33834)	-/-	./+	4:77116860	1:203335560	splice-site	intergenic	translocation	upstream	upstream	1	0	2	133	1	high	.	.	.	.	.	.	.
BT-474 (SRR064438)	validated	THRA	SKAP1	+/+	-/+	17:38243106	17:46371088	splice-site	intron	deletion/5'-5'	downstream	upstream	1	1	1	133	2	high	.	.	.	.	.	.	.
BT-474 (SRR064438)	non-validated	SECTM1	GCGR	-/+	+/+	17:80290580	17:79766718	intron	splice-site	duplication/3'-3'	downstream	upstream	1	0	1	4	0	high	.	.	low_entropy(1)	.	.	.	.
BT-474 (SRR064438)	non-validated	ZNF185	GABRA3	+/+	-/+	X:152114008	X:151468340	splice-site	intron	duplication/5'-5'	downstream	upstream	0	1	1	22	4	high	.	.	.	.	.	.	.
BT-474 (SRR064438)	non-validated	ZC3H11A	CNOT6L	+/+	-/+	1:203809502	4:78669403	splice-site	intron	translocation/5'-5'	downstream	upstream	0	1	1	45	2	high	.	.	.	.	.	.	.
BT-474 (SRR064438)	validated	MED13	BCAS3	-/-	+/+	17:60129898	17:59469338	splice-site	splice-site	inversion	upstream	upstream	0	1	1	13	29	high	.	.	.	.	.	.	.
BT-474 (SRR064438)	duplicate	MED13	BCAS3	-/-	+/+	17:60129898	17:59465979	splice-site	splice-site	inversion	upstream	upstream	0	0	0	13	17	medium	.	.	low_entropy(1)	.	.	.	.
BT-474 (SRR064438)	duplicate	STX16-NPEPL1	RAE1	+/+	+/+	20:57234690	20:55929088	splice-site	splice-site	duplication	downstream	upstream	0	0	9	30	307	medium	.	.	mismappers(1)	.	.	.	.
BT-474 (SRR064438)	non-validated	NCOA2	ZNF704	-/.	-/.	8:71279079	8:81733813	intron	CDS	duplication	upstream	downstream	0	0	6	1	7	medium	.	.	.	.	.	.	.
BT-474 (SRR064438)	non-validated	PSEN2	TRAPPC11(5568),STOX2(134271)	+/+	./+	1:227063251	4:184640313	splice-site	intergenic	translocation	downstream	upstream	5	0	0	17	3	medium	.	.	.	.	.	.	.
BT-474 (SRR064438)	non-validated	BCAS1	Metazoa_SRP(12411),B4GALNT2(9998)	-/-	./-	20:52672671	17:47199824	intron	intergenic	translocation	upstream	downstream	0	1	4	1	5	medium	.	.	.	.	.	.	.
BT-474 (SRR064438)	validated	SKA2	MYO19	-/-	-/-	17:57161425	17:34863318	3'UTR	CDS	deletion	upstream	downstream	0	0	5	61	115	medium	.	.	.	.	.	.	.
BT-474 (SRR064438)	duplicate	SKA2	MYO19	-/-	-/-	17:57232492	17:34863763	splice-site	splice-site	deletion	upstream	downstream	0	0	0	77	55	low	.	.	low_entropy(1)	.	.	.	.
BT-474 (SRR064438)	non-validated	OTOGL	MGAT4C	+/+	-/+	12:80648914	12:86828944	CDS	5'UTR	deletion/5'-5'	downstream	upstream	0	0	4	3	4	medium	.	.	.	.	.	.	.
BT-474 (SRR064438)	non-validated	FBXL20	WBSCR17	-/-	+/-	17:37557614	7:70958327	splice-site	intron	translocation/5'-5'	upstream	downstream	0	1	2	18	4	medium	.	.	.	.	.	.	.
BT-474 (SRR064438)	non-validated	DHX40P1	RP11-1058G23.1(93449),RP11-238F2.1(55890)	-/-	./+	17:58053422	17:68718855	exon	intergenic	inversion	upstream	upstream	0	0	2	2	2	medium	.	.	.	.	.	.	.
BT-474 (SRR064438)	non-validated	LRTOMT	FCHSD2	+/.	-/.	11:71791498	11:72742800	5'UTR	intron	inversion	upstream	upstream	0	0	2	10	1	medium	.	.	.	.	.	.	.
BT-474 (SRR064438)	non-validated	NUMA1	FCHSD2	-/-	-/+	11:71791504	11:72742729	splice-site	intron	inversion/5'-5'	upstream	upstream	1	0	1	8	1	medium	.	.	.	.	.	.	.
BT-474 (SRR064438)	validated	PIP4K2B	RAD51C	-/-	+/+	17:36933940	17:56809845	splice-site	splice-site	inversion	upstream	upstream	1	0	1	291	64	medium	.	.	.	.	.	.	.
BT-474 (SRR064438)	duplicate	PIP4K2B	RAD51C	-/-	+/+	17:36933940	17:56809842	splice-site	splice-site	inversion	upstream	upstream	0	1	1	291	64	medium	.	.	.	.	.	.	.
BT-474 (SRR064438)	non-validated	TPD52L2	DNAJC5	+/+	+/+	20:62500794	20:62559688	splice-site	splice-site	deletion/read-through	downstream	upstream	1	0	6	100	31	low	.	.	.	.	.	.	.
BT-474 (SRR064438)	duplicate	TPD52L2	DNAJC5	+/+	+/+	20:62502376	20:62559688	intron	splice-site	deletion/read-through	downstream	upstream	0	0	6	1	31	low	.	.	mismappers(1)	.	.	.	.
BT-474 (SRR064438)	non-validated	RP11-208G20.3	PSPH	+/+	-/-	7:152064076	7:56088883	exon	CDS	inversion	downstream	downstream	0	0	4	7	142	low	.	.	mismatches(1)	.	.	.	.
BT-474 (SRR064438)	non-validated	BRD4	RFX1	-/-	-/-	19:15443101	19:14094407	splice-site	splice-site	deletion	upstream	downstream	1	0	1	30	14	low	.	.	mismatches(1)	.	.	.	.
BT-474 (SRR064438)	validated	CPNE1	PI3	-/-	+/+	20:34243124	20:43804502	splice-site	splice-site	inversion	upstream	upstream	1	0	1	79	1	low	.	.	.	.	.	.	.
BT-474 (SRR064438)	validated	TRPC4AP	MRPL45	-/-	+/+	20:33665849	17:36478009	splice-site	splice-site	translocation	upstream	upstream	0	1	1	206	405	low	.	.	.	.	.	.	.
BT-474 (SRR064438)	non-validated	CTD-2319I12.2	HEATR6	+/+	-/-	17:58156833	17:58136882	splice-site	splice-site	inversion	downstream	downstream	1	0	1	5	26	low	.	.	mismappers(1)	.	.	.	.
BT-474 (SRR064439)	validated	THRA	AC090627.1	+/+	+/+	17:38243106	17:46371709	splice-site	exon	deletion	downstream	upstream	23	12	65	93	17	high	.	.	duplicates(3)	.	.	.	.
BT-474 (SRR064439)	duplicate	THRA	AC090627.1	+/+	+/+	17:38243106	17:46384693	splice-site	splice-site	deletion	downstream	upstream	4	2	14	93	72	high	.	.	.	.	.	.	.
BT-474 (SRR064439)	validated	ACACA	STAC2	-/-	-/-	17:35479453	17:37374426	splice-site	splice-site	duplication	upstream	downstream	2	3	43	95	19	high	.	.	duplicates(2),mismatches(1)	.	.	.	.
BT-474 (SRR064439)	validated	RPS6KB1	SNF8	+/+	-/-	17:57970686	17:47021337	splice-site	splice-site	inversion	downstream	downstream	4	7	30	69	225	high	.	.	duplicates(1),low_entropy(1)	.	.	.	.
BT-474 (SRR064439)	validated	VAPB	IKZF3	+/+	-/-	20:56964573	17:37934020	splice-site	splice-site	translocation	downstream	downstream	6	3	29	139	22	high	.	.	.	.	.	.	.
BT-474 (SRR064439)	duplicate	VAPB	IKZF3	+/+	-/-	20:56964573	17:37944627	splice-site	splice-site	translocation	downstream	downstream	0	1	32	139	3	high	.	.	.	.	.	.	.
BT-474 (SRR064439)	duplicate	VAPB	IKZF3	+/+	-/-	20:56964573	17:37922746	splice-site	splice-site	translocation	downstream	downstream	1	1	9	139	25	high	.	.	.	.	.	.	.
BT-474 (SRR064439)	validated	TOB1	SYNRG	-/-	-/-	17:48943419	17:35880751	splice-site	splice-site	deletion	upstream	downstream	3	6	25	140	48	high	.	.	low_entropy(2)	.	.	.	.
BT-474 (SRR064439)	validated	STX16	RAE1	+/+	+/+	20:57234690	20:55929088	splice-site	splice-site	duplication	downstream	upstream	0	1	21	22	230	high	.	.	mismatches(1)	.	.	.	.
BT-474 (SRR064439)	duplicate	STX16	RAE1	+/+	+/+	20:57227143	20:55929088	splice-site	splice-site	duplication	downstream	upstream	0	2	18	84	230	high	.	.	mismatches(1)	.	.	.	.
BT-474 (SRR064439)	duplicate	STX16	RAE1	+/+	+/+	20:57227194	20:55929088	splice-site	splice-site	duplication	downstream	upstream	0	0	0	20	230	medium	.	.	low_entropy(1)	.	.	.	.
BT-474 (SRR064439)	validated	MED1	STXBP4	-/-	+/+	17:37607291	17:53218671	splice-site	splice-site	inversion	upstream	upstream	4	1	10	103	19	high	.	.	.	.	.	.	.
BT-474 (SRR064439)	duplicate	STX16-NPEPL1	RAE1	+/+	+/+	20:57234690	20:55929088	splice-site	splice-site	duplication	downstream	upstream	0	1	11	22	230	high	.	.	mismatches(1)	.	.	.	.
BT-474 (SRR064439)	duplicate	STX16-NPEPL1	RAE1	+/+	+/+	20:57227194	20:55929088	splice-site	splice-site	duplication	downstream	upstream	0	0	0	20	230	medium	.	.	low_entropy(1)	.	.	.	.
BT-474 (SRR064439)	validated	RAB22A	MYO9B	+/+	+/+	20:56886178	19:17256207	splice-site	splice-site	translocation	downstream	upstream	0	2	7	36	11	high	.	.	.	.	.	.	.
BT-474 (SRR064439)	validated	STARD3	DOK5	+/+	+/+	17:37793484	20:53259997	splice-site	splice-site	translocation	downstream	upstream	1	2	5	233	4	high	.	.	.	.	.	.	.
BT-474 (SRR064439)	validated	DIDO1	TTI1	-/-	-/-	20:61569148	20:36642259	splice-site	splice-site	deletion	upstream	downstream	0	1	6	12	16	high	.	.	.	.	.	.	.
BT-474 (SRR064439)	validated	TRIM37	MYO19	-/-	-/-	17:57161363	17:34863763	splice-site	splice-site	deletion	upstream	downstream	1	0	5	34	25	high	.	.	.	.	.	.	.
BT-474 (SRR064439)	validated	SKA2	MYO19	-/-	-/-	17:57231919	17:34863763	intron	splice-site	deletion	upstream	downstream	0	1	5	2	25	high	.	.	.	.	.	.	.
BT-474 (SRR064439)	validated	GLB1	CMTM7	-/-	+/+	3:33055548	3:32483332	splice-site	splice-site	inversion	upstream	upstream	1	0	4	9	2	high	.	.	.	.	.	.	.
BT-474 (SRR064439)	non-validated	FBXL20	WBSCR17	-/-	+/-	17:37557614	7:70958327	splice-site	intron	translocation/5'-5'	upstream	downstream	1	0	4	36	3	high	.	.	.	.	.	.	.
BT-474 (SRR064439)	validated	MED1	ACSF2	-/-	+/+	17:37595418	17:48548389	splice-site	splice-site	inversion	upstream	upstream	0	1	4	94	64	high	.	.	.	.	.	.	.
BT-474 (SRR064439)	non-validated	PSEN2	TRAPPC11(5568),STOX2(134271)	+/+	./+	1:227063251	4:184640313	splice-site	intergenic	translocation	downstream	upstream	1	2	1	17	3	high	.	.	.	.	.	.	.
BT-474 (SRR064439)	non-validated	CBFA2T2	AL035457.1(72174),AL079339.1(127462)	+/+	./+	20:32207412	20:49866310	splice-site	intergenic	deletion	downstream	upstream	1	0	3	5	0	high	.	.	.	.	.	.	.
BT-474 (SRR064439)	non-validated	FITM2	UQCC1	-/-	-/-	20:42939616	20:33902568	splice-site	splice-site	deletion	upstream	downstream	1	0	3	39	67	high	.	.	.	.	.	.	.
BT-474 (SRR064439)	validated	MED13	BCAS3	-/-	+/+	17:60129898	17:59469338	splice-site	splice-site	inversion	upstream	upstream	0	1	2	7	25	high	.	.	.	.	.	.	.
BT-474 (SRR064439)	non-validated	MEF2D	OR10J1	-/-	+/+	1:156449082	1:159409566	splice-site	CDS	inversion	upstream	upstream	0	2	1	10	2	high	.	.	.	.	.	.	.
BT-474 (SRR064439)	non-validated	RN7SL102P(35723),C17orf96(14505)	KDM5A	./+	-/-	17:36813456	12:443588	intergenic	splice-site	translocation	downstream	downstream	0	1	1	1	5	high	.	.	.	.	.	.	.
BT-474 (SRR064439)	validated	ZMYND8	CEP250	-/-	+/+	20:45853050	20:34078467	CDS	CDS	inversion	upstream	upstream	0	0	31	53	30	medium	.	.	.	.	.	.	.
BT-474 (SRR064439)	duplicate	ZMYND8	CEP250	-/-	+/+	20:45852970	20:34078463	splice-site	splice-site	inversion	upstream	upstream	0	0	0	47	30	low	.	.	low_entropy(2)	.	.	.	.
BT-474 (SRR064439)	validated	AHCTF1	NAAA	-/-	-/-	1:247094880	4:76846964	splice-site	splice-site	translocation	upstream	downstream	0	1	22	19	33	medium	.	.	duplicates(1),mismatches(1)	.	.	.	.
BT-474 (SRR064439)	non-validated	ACSF2	C17orf112(24601),RP11-750B16.1(93482)	+/+	./+	17:48548600	17:51089613	exon	intergenic	deletion	downstream	upstream	0	1	7	0	5	medium	.	.	duplicates(1)	.	.	.	.
BT-474 (SRR064439)	non-validated	RP11-208G20.3	PSPH	+/+	-/-	7:152064071	7:56088890	exon	CDS	inversion	downstream	downstream	0	0	8	9	55	medium	.	.	mismatches(5)	.	.	.	.
BT-474 (SRR064439)	non-validated	PPP6R3	SHANK2	+/+	-/+	11:68228296	11:70803413	intron	intron	deletion/5'-5'	downstream	upstream	0	0	5	37	7	medium	.	.	.	.	.	.	.
BT-474 (SRR064439)	validated	LAMP1	MCF2L	+/+	+/+	13:113951766	13:113718630	CDS	CDS	duplication	downstream	upstream	0	0	5	34	22	medium	.	.	.	.	.	.	.
BT-474 (SRR064439)	non-validated	PCNXL3	RP11-554A11.8(44959),MYEOV(77614)	+/.	./.	11:65391207	11:68983991	intron	intergenic	deletion	downstream	upstream	0	1	3	1	2	medium	.	.	.	.	.	.	.
BT-474 (SRR064439)	non-validated	PTRH2	BCAS3	-/-	+/-	17:57784732	17:59315043	splice-site	intron	duplication/5'-5'	upstream	downstream	0	4	0	73	5	medium	.	.	.	.	.	.	.
BT-474 (SRR064439)	non-validated	BCAS1	Metazoa_SRP(12411),B4GALNT2(9998)	-/-	./-	20:52672671	17:47199824	intron	intergenic	translocation	upstream	downstream	0	1	3	0	2	medium	.	.	.	.	.	.	.
BT-474 (SRR064439)	non-validated	BRD4	RFX1	-/-	-/-	19:15441711	19:14114430	intron	intron	deletion	upstream	downstream	0	1	3	1	3	medium	.	.	low_entropy(2),mismatches(1)	.	.	.	.
BT-474 (SRR064439)	duplicate	BRD4	RFX1	-/-	-/-	19:15443101	19:14094407	splice-site	splice-site	deletion	upstream	downstream	0	0	0	31	24	low	.	.	mismatches(1)	.	.	.	.
BT-474 (SRR064439)	non-validated	SNX25	RP11-134P9.3(6973),RP11-134P9.1(2984)	+/+	./+	4:186168462	1:203264902	5'UTR	intergenic	translocation	downstream	upstream	0	0	3	5	7	medium	.	.	.	.	.	.	.
BT-474 (SRR064439)	non-validated	LRTOMT	FCHSD2	+/.	-/.	11:71791516	11:72707850	5'UTR	intron	inversion	upstream	upstream	0	0	3	15	1	medium	.	.	.	.	.	.	.
BT-474 (SRR064439)	non-validated	POLA2	MAP3K11	+/+	-/-	11:65030260	11:65374768	intron	CDS	inversion	downstream	downstream	0	0	3	5	24	medium	.	.	.	.	.	.	.
BT-474 (SRR064439)	validated	CPNE1	PI3	-/-	+/+	20:34243230	20:43804502	5'UTR	CDS	inversion	upstream	upstream	0	0	3	43	2	medium	.	.	.	.	.	.	.
BT-474 (SRR064439)	duplicate	RBM12	PI3	-/-	+/+	20:34243230	20:43804502	CDS	CDS	inversion	upstream	upstream	0	0	3	43	2	medium	.	.	.	.	.	.	.
BT-474 (SRR064439)	non-validated	RB1CC1	AP003068.17(1875),SPDYC(7897)	-/.	./.	8:53564377	11:64929728	intron	intergenic	translocation	upstream	downstream	0	1	1	0	1	medium	.	.	.	.	.	.	.
BT-474 (SRR064439)	non-validated	ZC3H11B	CNOT6L	-/-	-/+	1:219784465	4:78669412	exon	intron	translocation/5'-5'	upstream	upstream	0	0	2	3	1	medium	.	.	.	.	.	.	.
BT-474 (SRR064439)	non-validated	ERN1	TBC1D3P2	-/-	-/-	17:62175027	17:60345177	intron	intron	deletion	upstream	downstream	0	1	1	1	0	medium	.	.	.	.	.	.	.
BT-474 (SRR064439)	non-validated	ZNF185	GABRA3	+/+	-/+	X:152113889	X:151468366	CDS	intron	duplication/5'-5'	downstream	upstream	0	0	2	9	2	medium	.	.	.	.	.	.	.
BT-474 (SRR064439)	non-validated	BCAS3	RP11-618P13.1(81496),ISCA1P3(440976)	+/+	./-	17:59161897	17:52114181	CDS	intergenic	inversion	downstream	downstream	0	0	2	10	3	medium	.	.	.	.	.	.	.
BT-474 (SRR064439)	non-validated	GAPDHP40	RN7SL732P(201),GAPDHP1(108)	-/-	./-	5:159377517	X:39646278	exon	intergenic	translocation	upstream	downstream	0	0	2	3	205	medium	.	.	.	.	.	.	.
BT-474 (SRR064439)	non-validated	SCARB2	RP11-435P24.2(12781),RP11-435P24.3(33834)	-/-	./+	4:77116860	1:203335560	splice-site	intergenic	translocation	upstream	upstream	0	1	1	66	2	medium	.	.	.	.	.	.	.
BT-474 (SRR064439)	non-validated	NUMA1	FCHSD2	-/-	-/+	11:71791504	11:72754858	splice-site	intron	inversion/5'-5'	upstream	upstream	0	1	1	15	3	medium	.	.	.	.	.	.	.
BT-474 (SRR064439)	validated	PIP4K2B	RAD51C	-/-	+/+	17:36933940	17:56811479	splice-site	splice-site	inversion	upstream	upstream	0	1	1	158	25	medium	.	.	.	.	.	.	.
BT-474 (SRR064439)	duplicate	PIP4K2B	RAD51C	-/-	+/+	17:36933940	17:56809845	splice-site	splice-site	inversion	upstream	upstream	1	0	1	158	39	medium	.	.	.	.	.	.	.
BT-474 (SRR064439)	non-validated	TPD52L2	DNAJC5	+/+	+/+	20:62500794	20:62559688	splice-site	splice-site	deletion/read-through	downstream	upstream	0	3	5	64	36	low	.	.	.	.	.	.	.
BT-474 (SRR064439)	duplicate	TPD52L2	DNAJC5	+/+	+/+	20:62496737	20:62559688	splice-site	splice-site	deletion/read-through	downstream	upstream	1	0	0	35	36	low	.	.	.	.	.	.	.
BT-474 (SRR064439)	non-validated	MAP3K11	RP11-211G23.2	-/-	+/+	11:65380298	11:69186586	exon	intron	inversion	upstream	upstream	0	0	2	3	2	low	.	.	.	.	.	.	.
BT-474 (SRR064439)	non-validated	FAM168B	ANKHD1	-/.	+/.	2:131838745	5:139914978	intron	CDS	translocation/3'-3'	downstream	upstream	1	0	1	2	8	low	.	.	.	.	.	.	.
BT-474 (SRR064439)	duplicate	FAM168B	ANKHD1-EIF4EBP3	-/.	+/.	2:131838745	5:139914978	intron	CDS	translocation/3'-3'	downstream	upstream	1	0	1	2	8	low	.	.	.	.	.	.	.
BT-474 (SRR064439)	non-validated	BCAS1	RP11-347D21.2(3645),RP11-347D21.3(18240)	-/-	./-	20:52611549	20:46590992	intron	intergenic	deletion	upstream	downstream	0	0	2	36	1	low	.	.	.	.	.	.	.
KPL-4 (SRR064287)	validated	BSG	NFIX	+/+	+/+	19:580782	19:13135835	splice-site	splice-site	deletion	downstream	upstream	1	6	24	97	36	high	.	.	mismatches(1)	.	.	.	.
KPL-4 (SRR064287)	validated	NOTCH1	NUP214	-/-	+/+	9:139438476	9:134062676	splice-site	splice-site	inversion	upstream	upstream	2	1	7	9	24	high	.	.	.	.	.	.	.
KPL-4 (SRR064287)	non-validated	SMCHD1	RPL7AP57(101411),NDUFB11P1(72732)	+/+	./-	18:2707918	11:91996466	splice-site	intergenic	translocation	downstream	downstream	1	1	4	13	30	high	.	.	duplicates(2),low_entropy(6)	.	.	.	.
KPL-4 (SRR064287)	validated	PPP1R12A	SEPT10	-/-	-/-	12:80211174	2:110343415	splice-site	splice-site	translocation	upstream	downstream	3	1	2	15	5	high	.	.	.	.	.	.	.
KPL-4 (SRR064287)	non-validated	RNU6ATAC(835),LL09NC01-139C3.1(3370)	CACNA1B	./+	+/+	9:137030521	9:140851223	intergenic	splice-site	deletion	downstream	upstream	0	1	4	1	3	high	.	.	.	.	.	.	.
KPL-4 (SRR064287)	non-validated	C5	C9orf170	-/-	+/+	9:123719563	9:89771488	splice-site	splice-site	inversion	upstream	upstream	1	1	1	6	2	high	.	.	.	.	.	.	.
KPL-4 (SRR064287)	non-validated	WASF3	COL5A1	+/+	+/+	13:27187195	9:137714844	splice-site	splice-site	translocation	downstream	upstream	0	1	1	3	2	high	.	.	.	.	.	.	.
KPL-4 (SRR064287)	non-validated	WHSC1	OR7E43P(8261),OTOP1(5304)	+/+	./-	4:1906105	4:4185226	splice-site	intergenic	inversion	downstream	downstream	0	1	1	18	2	high	.	.	.	.	.	.	.
KPL-4 (SRR064287)	non-validated	INIP	CDC26	-/-	-/-	9:115478741	9:116018828	splice-site	splice-site	duplication	upstream	downstream	1	0	1	24	2	high	.	.	.	.	.	.	.
KPL-4 (SRR064287)	non-validated	INIP	C5	-/-	-/-	9:115478741	9:123719646	splice-site	splice-site	duplication	upstream	downstream	1	0	1	24	4	high	.	.	.	.	.	.	.
KPL-4 (SRR064287)	non-validated	CTC-340D7.1	C9orf129	-/.	-/.	5:68167432	9:96097588	intron	intron	translocation	downstream	upstream	1	5	19	19	28	medium	.	.	.	.	.	.	.
KPL-4 (SRR064287)	non-validated	MTRNR2L8	MTRNR2L1	-/.	+/.	11:10519647	17:22023736	intron	3'UTR	translocation	upstream	upstream	0	0	20	0	287	medium	.	.	duplicates(30),mismappers(64),mismatches(7)	.	.	.	.
KPL-4 (SRR064287)	non-validated	EHMT1	NTNG2	+/+	+/+	9:140513501	9:135073353	splice-site	splice-site	duplication	downstream	upstream	0	6	0	19	5	medium	.	.	.	.	.	.	.
KPL-4 (SRR064287)	non-validated	URM1	ATP8A2	+/+	+/+	9:131146768	13:26303757	intron	intron	translocation	downstream	upstream	0	1	3	0	1	medium	.	.	.	.	.	.	.
KPL-4 (SRR064287)	non-validated	ZNF676	ZNF536	-/-	+/-	19:22364382	19:30741020	CDS	intron	duplication/5'-5'	upstream	downstream	0	0	3	0	5	medium	.	.	.	.	.	.	.
KPL-4 (SRR064287)	non-validated	C9orf78	ABCA1	-/-	-/+	9:132595755	9:107628599	CDS	intron	inversion/5'-5'	upstream	upstream	2	0	1	77	1	medium	.	.	.	.	.	.	.
KPL-4 (SRR064287)	non-validated	C5	FAM120A	-/-	+/+	9:123719607	9:96289436	CDS	intron	inversion	upstream	upstream	0	0	3	4	47	low	.	.	.	.	.	.	.
KPL-4 (SRR064287)	non-validated	RASD2	RASD2(26941),MB(25822)	+/+	./+	22:35948441	22:35976989	3'UTR	intergenic	deletion/read-through	downstream	upstream	0	0	2	2	5	low	.	.	.	.	.	.	.
KPL-4 (SRR064287)	non-validated	AKR1B10P1	AKR1B10P2	+/+	+/+	10:69510523	18:66123753	exon	exon	translocation	downstream	upstream	0	0	2	3	13	low	.	.	.	.	.	.	.
KPL-4 (SRR064287)	non-validated	STRA13	DUS1L	-/-	-/-	17:79980702	17:80022945	splice-site	splice-site	duplication	upstream	downstream	0	1	1	49	24	low	.	.	.	.	.	.	.
MCF-7 (ERR358487)	confirmed_by_structural_variant	FOXA1	TTC6	-/-	+/-	14:38061535	14:38184711	CDS	intron	duplication/5'-5'	upstream	downstream	268	211	300	1701	540	high	.	.	duplicates(21),low_entropy(1)	.	.	.	.
MCF-7 (ERR358487)	validated	BCAS4	BCAS3	+/+	+/+	20:49411710	17:59445688	splice-site	splice-site	translocation	downstream	upstream	179	177	299	787	713	high	.	.	duplicates(44),mismappers(1),mismatches(1)	.	.	.	.
MCF-7 (ERR358487)	duplicate	BCAS4	BCAS3	+/+	+/+	20:49411710	17:59430949	splice-site	splice-site	translocation	downstream	upstream	12	4	300	787	26	high	.	.	duplicates(16),mismappers(1),mismatches(1)	.	.	.	.
MCF-7 (ERR358487)	duplicate	BCAS4	BCAS3	+/+	+/+	20:49411710	17:59431723	splice-site	splice-site	translocation	downstream	upstream	0	2	300	787	75	high	.	.	duplicates(16),mismappers(1),mismatches(1)	.	.	.	.
MCF-7 (ERR358487)	duplicate	BCAS4	BCAS3	+/+	+/+	20:49411710	17:59469338	splice-site	splice-site	translocation	downstream	upstream	0	1	86	787	1457	high	.	.	duplicates(3)	.	.	.	.
MCF-7 (ERR358487)	confirmed_by_structural_variant	ATXN7	RP5-947P14.1(131806),RP11-478L17.1(328037)	+/+	./+	3:63898901	1:106758927	splice-site	intergenic	translocation	downstream	upstream	136	243	249	471	588	high	.	.	duplicates(29),low_entropy(2),mismappers(12)	.	.	.	.
MCF-7 (ERR358487)	non-validated	ZNF217	SULF2	-/-	-/+	20:52210295	20:46415149	splice-site	5'UTR	inversion/5'-5'	upstream	upstream	8	302	200	345	1185	high	.	.	duplicates(48)	.	.	.	.
MCF-7 (ERR358487)	validated	PAPOLA	AK7	+/+	+/+	14:96968937	14:96904172	splice-site	splice-site	duplication	downstream	upstream	98	175	193	2155	350	high	.	.	duplicates(29),inconsistently_clipped(2),low_entropy(3),mismatches(1)	.	.	.	.
MCF-7 (ERR358487)	duplicate	PAPOLA	AK7	+/+	+/+	14:96968937	14:96909067	splice-site	splice-site	duplication	downstream	upstream	2	1	100	2155	438	high	.	.	duplicates(1)	.	.	.	.
MCF-7 (ERR358487)	duplicate	PAPOLA	AK7	+/+	+/+	14:96968937	14:96916139	splice-site	splice-site	duplication	downstream	upstream	0	1	20	2155	531	high	.	.	.	.	.	.	.
MCF-7 (ERR358487)	validated	ARFGEF2	SULF2	+/+	-/-	20:47538547	20:46365686	splice-site	splice-site	inversion	downstream	downstream	136	201	105	360	514	high	.	.	duplicates(29),mismappers(3),mismatches(1)	.	.	.	.
MCF-7 (ERR358487)	duplicate	ARFGEF2	SULF2	+/+	-/-	20:47538547	20:46331414	splice-site	splice-site	inversion	downstream	downstream	1	1	3	360	843	high	.	.	.	.	.	.	.
MCF-7 (ERR358487)	non-validated	MAN2B1	HOOK2	-/-	-/-	19:12775209	19:12928493	intron	intron	duplication	upstream	downstream	104	40	80	188	165	high	.	.	duplicates(25),inconsistently_clipped(2),low_entropy(5)	.	.	.	.
MCF-7 (ERR358487)	validated	DEPDC1B	ELOVL7	-/-	-/-	5:59934577	5:60053472	splice-site	splice-site	duplication	upstream	downstream	69	38	92	302	143	high	.	.	duplicates(2)	.	.	.	.
MCF-7 (ERR358487)	duplicate	DEPDC1B	ELOVL7	-/-	-/-	5:59938639	5:60053472	splice-site	splice-site	duplication	upstream	downstream	1	0	21	376	143	high	.	.	.	.	.	.	.
MCF-7 (ERR358487)	non-validated	PROSC	RP11-150O12.1	+/+	-/+	8:37633534	8:37396582	splice-site	intron	duplication/5'-5'	downstream	upstream	69	45	84	278	135	high	.	.	duplicates(2)	.	.	.	.
MCF-7 (ERR358487)	validated	TXLNG	SYAP1	+/+	+/+	X:16804712	X:16753350	splice-site	splice-site	duplication	downstream	upstream	27	76	93	363	930	high	.	.	duplicates(21),low_entropy(1),mismatches(1)	.	.	.	.
MCF-7 (ERR358487)	non-validated	USP3	APH1B	+/+	+/+	15:63797029	15:63578757	splice-site	splice-site	duplication	downstream	upstream	50	45	78	738	327	high	.	.	duplicates(9),low_entropy(1)	.	.	.	.
MCF-7 (ERR358487)	duplicate	USP3	APH1B	+/+	+/+	15:63797029	15:63594544	splice-site	splice-site	duplication	downstream	upstream	2	2	25	738	469	high	.	.	.	.	.	.	.
MCF-7 (ERR358487)	non-validated	CAMK2G	VCL	-/-	+/-	10:75606983	10:75781158	splice-site	intron	duplication/5'-5'	upstream	downstream	27	46	96	335	130	high	.	.	low_entropy(3)	.	.	.	.
MCF-7 (ERR358487)	duplicate	CAMK2G	RP11-417O11.5	-/-	+/-	10:75606983	10:75781158	splice-site	intron	duplication/5'-5'	upstream	downstream	27	46	96	335	130	high	.	.	low_entropy(3)	.	.	.	.
MCF-7 (ERR358487)	non-validated	PAWR	RP11-530C5.1	-/-	+/-	12:80083509	12:80118285	splice-site	intron	duplication/5'-5'	upstream	downstream	39	47	48	667	114	high	.	.	duplicates(11),inconsistently_clipped(2),mismappers(23)	.	.	.	.
MCF-7 (ERR358487)	validated	SMARCA4	CARM1	+/+	+/+	19:11097269	19:11015627	splice-site	splice-site	duplication	downstream	upstream	43	26	62	466	431	high	.	.	duplicates(1),low_entropy(1)	.	.	.	.
MCF-7 (ERR358487)	duplicate	SMARCA4	CARM1	+/+	+/+	19:11071850	19:11015627	splice-site	splice-site	duplication	downstream	upstream	4	1	0	625	431	medium	.	.	.	.	.	.	.
MCF-7 (ERR358487)	non-validated	MLLT4	KIF25	+/+	+/+	6:168227917	6:168418653	splice-site	splice-site	deletion/read-through	downstream	upstream	36	37	41	158	110	high	.	.	duplicates(3),low_entropy(2)	.	.	.	.
MCF-7 (ERR358487)	confirmed_by_structural_variant	NCOA3	RP11-478L17.1(36653),RP11-110F24.1(198826)	+/+	./+	20:46130763	1:107124019	splice-site	intergenic	translocation	downstream	upstream	13	62	28	1669	153	high	.	.	duplicates(5),inconsistently_clipped(4)	.	.	.	.
MCF-7 (ERR358487)	validated	GCN1L1	MSI1	-/-	-/-	12:120628101	12:120785317	splice-site	splice-site	duplication	upstream	downstream	29	27	42	334	78	high	.	.	duplicates(3)	.	.	.	.
MCF-7 (ERR358487)	duplicate	GCN1L1	MSI1	-/-	-/-	12:120628101	12:120789203	splice-site	splice-site	duplication	upstream	downstream	2	2	43	334	34	high	.	.	.	.	.	.	.
MCF-7 (ERR358487)	confirmed_by_structural_variant	MIDN	STK11	+/+	+/+	19:1254477	19:1191792	splice-site	intron	duplication	downstream	upstream	34	18	42	620	111	high	.	.	duplicates(4),mismappers(29),mismatches(4)	.	.	.	.
MCF-7 (ERR358487)	confirmed_by_structural_variant	ZBTB25	RP11-973N13.2	-/-	-/-	14:64952683	14:65067081	3'UTR	exon	duplication	upstream	downstream	31	47	15	117	56	high	.	.	duplicates(3),mismappers(1)	.	.	.	.
MCF-7 (ERR358487)	validated	ATXN7L3	FAM171A2	-/-	-/-	17:42275388	17:42433956	splice-site	splice-site	duplication	upstream	downstream	7	56	27	374	217	high	.	.	mismatches(1)	.	.	.	.
MCF-7 (ERR358487)	validated	GATAD2B	NUP210L	-/-	-/-	1:153895209	1:154000073	splice-site	splice-site	duplication	upstream	downstream	25	26	24	192	93	high	.	.	duplicates(2)	.	.	.	.
MCF-7 (ERR358487)	duplicate	GATAD2B	NUP210L	-/-	-/-	1:153895209	1:154002530	splice-site	splice-site	duplication	upstream	downstream	2	9	30	192	18	high	.	.	.	.	.	.	.
MCF-7 (ERR358487)	validated	AC099850.1	VMP1	+/+	+/+	17:57184952	17:57915656	splice-site	splice-site	deletion	downstream	upstream	9	20	38	239	1978	high	.	.	duplicates(1),mismatches(1)	.	.	.	.
MCF-7 (ERR358487)	duplicate	AC099850.1	VMP1	+/+	+/+	17:57184952	17:57911373	splice-site	splice-site	deletion	downstream	upstream	2	0	38	239	30	high	.	.	.	.	.	.	.
MCF-7 (ERR358487)	non-validated	CASP7	VTI1A	+/+	+/+	10:115457362	10:114427977	splice-site	splice-site	duplication	downstream	upstream	27	21	13	287	203	high	.	.	.	.	.	.	.
MCF-7 (ERR358487)	confirmed_by_structural_variant	ATP9A	RNU7-92P(41182),RP11-347D21.1(5194)	-/-	./+	20:50255882	20:46574349	splice-site	intergenic	inversion	upstream	upstream	33	13	15	248	30	high	.	.	duplicates(1)	.	.	.	.
MCF-7 (ERR358487)	validated	RSBN1	AP4B1-AS1	-/-	+/+	1:114354332	1:114442494	splice-site	splice-site	inversion	upstream	upstream	16	18	26	242	87	high	.	.	duplicates(1)	.	.	.	.
MCF-7 (ERR358487)	duplicate	RSBN1	AP4B1-AS1	-/-	+/+	1:114354332	1:114440490	splice-site	splice-site	inversion	upstream	upstream	3	1	26	242	277	high	.	.	.	.	.	.	.
MCF-7 (ERR358487)	non-validated	CHD7	RAB2A	+/+	+/+	8:61655656	8:61531139	splice-site	splice-site	duplication	downstream	upstream	13	23	21	92	928	high	.	.	duplicates(1)	.	.	.	.
MCF-7 (ERR358487)	confirmed_by_structural_variant	BCAS3	SNTN(39526),AC136289.1(23747)	+/+	./+	17:58824640	3:63704222	splice-site	intergenic	translocation	downstream	upstream	10	9	37	346	37	high	.	.	mismappers(1)	.	.	.	.
MCF-7 (ERR358487)	validated	MYO9B	FCHO1	+/+	+/+	19:17213367	19:17881234	splice-site	splice-site	deletion	downstream	upstream	9	11	28	150	35	high	.	.	.	.	.	.	.
MCF-7 (ERR358487)	duplicate	MYO9B	FCHO1	+/+	+/+	19:17213367	19:17881601	splice-site	splice-site	deletion	downstream	upstream	1	1	7	150	55	high	.	.	.	.	.	.	.
MCF-7 (ERR358487)	non-validated	SUCO	DNM3	+/+	+/+	1:172544763	1:172222713	splice-site	splice-site	duplication	downstream	upstream	19	10	17	291	35	high	.	.	low_entropy(1),mismappers(2)	.	.	.	.
MCF-7 (ERR358487)	duplicate	SUCO	DNM3	+/+	+/+	1:172539870	1:172222713	splice-site	splice-site	duplication	downstream	upstream	1	2	4	340	35	high	.	.	.	.	.	.	.
MCF-7 (ERR358487)	non-validated	PREX1	RP1-148H17.1(44376),RPL35AP(21511)	-/-	./-	20:47292731	20:46085447	splice-site	intergenic	deletion	upstream	downstream	12	15	17	1393	29	high	.	.	low_entropy(3),mismappers(3)	.	.	.	.
MCF-7 (ERR358487)	validated	TEX14	PTPRG	-/-	+/+	17:56636814	3:61608137	splice-site	intron	translocation	upstream	upstream	6	14	23	117	40	high	.	.	mismappers(1)	.	.	.	.
MCF-7 (ERR358487)	duplicate	TEX14	PTPRG	-/-	+/+	17:56636814	3:61734552	splice-site	splice-site	translocation	upstream	upstream	2	5	0	117	35	high	.	.	.	.	.	.	.
MCF-7 (ERR358487)	validated	ADAMTS19	SLC27A6	+/+	+/+	5:128797450	5:128364038	splice-site	splice-site	duplication	downstream	upstream	2	16	24	42	79	high	.	.	.	.	.	.	.
MCF-7 (ERR358487)	duplicate	ADAMTS19	SLC27A6	+/+	+/+	5:128796175	5:128364038	splice-site	splice-site	duplication	downstream	upstream	2	3	13	83	79	high	.	.	.	.	.	.	.
MCF-7 (ERR358487)	non-validated	GATAD2A	MAU2	+/+	+/+	19:19516828	19:19446527	splice-site	splice-site	duplication	downstream	upstream	3	0	39	217	7	high	.	.	low_entropy(1),mismatches(7)	.	.	.	.
MCF-7 (ERR358487)	duplicate	GATAD2A	MAU2	+/+	+/+	19:19496947	19:19446527	splice-site	splice-site	duplication	downstream	upstream	3	11	21	241	7	high	.	.	mismatches(14)	.	.	.	.
MCF-7 (ERR358487)	duplicate	GATAD2A	MAU2	+/+	+/+	19:19516828	19:19447979	splice-site	splice-site	duplication	downstream	upstream	1	0	22	217	207	high	.	.	.	.	.	.	.
MCF-7 (ERR358487)	non-validated	RAD51C	TEX14	+/+	-/+	17:56774220	17:56735314	splice-site	intron	duplication/5'-5'	downstream	upstream	18	6	16	1386	24	high	.	.	low_entropy(3)	.	.	.	.
MCF-7 (ERR358487)	confirmed_by_structural_variant	TOP1	RNA5SP484(163361),RNU2-52P(6615)	+/+	./+	20:39706277	20:39646230	splice-site	intergenic	duplication	downstream	upstream	8	10	17	1377	20	high	.	.	inconsistently_clipped(1)	.	.	.	.
MCF-7 (ERR358487)	confirmed_by_structural_variant	TRAPPC4	DSCAML1	+/+	-/+	11:118892596	11:117386244	splice-site	intron	duplication/5'-5'	downstream	upstream	27	1	3	700	4	high	.	.	.	.	.	.	.
MCF-7 (ERR358487)	non-validated	CHD2	FAM174B	+/+	-/+	15:93472321	15:93330541	splice-site	intron	duplication/5'-5'	downstream	upstream	10	6	15	313	45	high	.	.	duplicates(1),mismappers(3)	.	.	.	.
MCF-7 (ERR358487)	confirmed_by_structural_variant	GRHL2	KB-1562D12.1	+/+	-/+	8:102505017	8:102487410	splice-site	intron	duplication/5'-5'	downstream	upstream	11	12	8	445	65	high	.	.	mismappers(2)	.	.	.	.
MCF-7 (ERR358487)	duplicate	KB-1562D12.1	GRHL2	-/+	+/+	8:102487630	8:102555469	intron	splice-site	deletion/read-through/3'-3'	downstream	upstream	5	4	3	57	637	medium	.	.	mismappers(1),mismatches(1)	.	.	.	.
MCF-7 (ERR358487)	confirmed_by_structural_variant	DENND2C	RNU7-14P(71646),AC006076.1(59419)	-/-	./+	1:115161007	20:52356943	splice-site	intergenic	translocation	upstream	upstream	5	18	7	30	82	high	.	.	.	.	.	.	.
MCF-7 (ERR358487)	non-validated	PGGT1B	CCDC112(68468),CTNNAP1(24344)	-/-	./-	5:114557521	5:114700996	splice-site	intergenic	duplication	upstream	downstream	5	13	11	335	25	high	.	.	duplicates(1)	.	.	.	.
MCF-7 (ERR358487)	non-validated	FARS2	RP1-21P18.1(23618),RP4-529N6.2(45661)	+/+	./+	6:5261893	6:4553860	splice-site	intergenic	duplication	downstream	upstream	7	9	12	177	18	high	.	.	duplicates(1),low_entropy(1)	.	.	.	.
MCF-7 (ERR358487)	confirmed_by_structural_variant	PRPF18	BEND7	+/+	-/+	10:13653683	10:13539655	splice-site	intron	duplication/5'-5'	downstream	upstream	4	6	16	158	16	high	.	.	mismappers(2)	.	.	.	.
MCF-7 (ERR358487)	confirmed_by_structural_variant	NCOA3	RP5-947P14.1(451286),RP11-478L17.1(8557)	+/+	./+	20:46130763	1:107078407	splice-site	intergenic	translocation	downstream	upstream	3	18	5	1669	39	high	.	.	mismappers(7)	.	.	.	.
MCF-7 (ERR358487)	validated	BCAS4	ZMYND8	+/+	-/-	20:49411710	20:45850125	splice-site	splice-site	inversion	downstream	downstream	4	8	14	787	1667	high	.	.	inconsistently_clipped(1)	.	.	.	.
MCF-7 (ERR358487)	duplicate	BCAS4	ZMYND8	+/+	-/-	20:49411710	20:45839542	splice-site	splice-site	inversion	downstream	downstream	3	1	5	787	1799	high	.	.	.	.	.	.	.
MCF-7 (ERR358487)	confirmed_by_structural_variant	PDE8A	SCAND2P	+/+	+/+	15:85525579	15:85180578	splice-site	splice-site	duplication	downstream	upstream	5	3	16	58	43	high	.	.	.	.	.	.	.
MCF-7 (ERR358487)	non-validated	PARD6B	CADPS(23740),RP11-24H1.1(27252)	+/+	./-	20:49348389	3:62884794	splice-site	intergenic	translocation	downstream	downstream	6	6	12	734	22	high	.	.	mismappers(4)	.	.	.	.
MCF-7 (ERR358487)	validated	RSBN1	AP4B1	-/-	-/+	1:114354332	1:114437782	splice-site	CDS	inversion/5'-5'	upstream	upstream	0	2	22	242	305	high	.	.	.	.	.	.	.
MCF-7 (ERR358487)	non-validated	PIN1	ILF3	+/+	+/+	19:9958816	19:10781192	splice-site	splice-site	deletion	downstream	upstream	10	9	4	344	1619	high	.	.	duplicates(1),low_entropy(1)	.	.	.	.
MCF-7 (ERR358487)	duplicate	PIN1	ILF3	+/+	+/+	19:9949324	19:10781192	splice-site	splice-site	deletion	downstream	upstream	2	0	3	373	1619	high	.	.	.	.	.	.	.
MCF-7 (ERR358487)	confirmed_by_structural_variant	SMARCC1	EMCN	-/-	-/-	3:47779519	4:101491482	splice-site	splice-site	translocation	upstream	downstream	0	9	13	356	34	high	.	.	duplicates(1),mismappers(39)	.	.	.	.
MCF-7 (ERR358487)	duplicate	SMARCC1	EMCN	-/-	-/-	3:47779519	4:101505123	splice-site	splice-site	translocation	upstream	downstream	0	1	14	356	5	high	.	.	mismappers(18)	.	.	.	.
MCF-7 (ERR358487)	validated	RAD51C	ATXN7	+/+	+/+	17:56801461	3:63965591	splice-site	splice-site	translocation	downstream	upstream	5	7	10	1363	144	high	.	.	mismatches(1)	.	.	.	.
MCF-7 (ERR358487)	duplicate	RAD51C	ATXN7	+/+	+/+	17:56798173	3:63965591	splice-site	splice-site	translocation	downstream	upstream	5	1	9	1576	144	high	.	.	.	.	.	.	.
MCF-7 (ERR358487)	duplicate	RAD51C	ATXN7	+/+	+/+	17:56787351	3:63965591	splice-site	splice-site	translocation	downstream	upstream	0	1	5	1461	144	high	.	.	.	.	.	.	.
MCF-7 (ERR358487)	confirmed_by_structural_variant	PKP2	PKP2(82955),RP11-267D19.2(6043)	-/-	./+	12:33049443	12:33132729	splice-site	intergenic	inversion	upstream	upstream	8	3	10	89	13	high	.	.	.	.	.	.	.
MCF-7 (ERR358487)	non-validated	BAIAP2L1	AC074121.4(9638),NPTX2(128434)	-/-	./-	7:97949370	7:98118175	splice-site	intergenic	duplication	upstream	downstream	0	13	7	496	42	high	.	.	mismappers(30)	.	.	.	.
MCF-7 (ERR358487)	non-validated	THSD4	AC104434.1(11382),SNRK(64259)	+/+	./-	15:71704162	3:43263745	splice-site	intergenic	translocation	downstream	downstream	12	3	5	173	21	high	.	.	.	.	.	.	.
MCF-7 (ERR358487)	confirmed_by_structural_variant	FBRSL1	MUC8(1351),FBRSL1(14060)	+/+	./+	12:133104574	12:133052077	splice-site	intergenic	duplication	downstream	upstream	3	4	13	67	9	high	.	.	.	.	.	.	.
MCF-7 (ERR358487)	non-validated	MAN2B1	RNASEH2A	-/-	+/-	19:12775606	19:12923991	splice-site	CDS	duplication/5'-5'	upstream	downstream	12	5	3	405	1724	high	.	.	mismappers(1)	.	.	.	.
MCF-7 (ERR358487)	duplicate	RP11-295P9.3	BEND7	+/+	-/+	10:13653683	10:13539655	splice-site	intron	duplication/5'-5'	downstream	upstream	4	6	8	158	16	high	.	.	mismappers(2)	.	.	.	.
MCF-7 (ERR358487)	validated	BCAS3	ATXN7	+/+	+/+	17:58824640	3:63981181	splice-site	splice-site	translocation	downstream	upstream	6	6	6	346	171	high	.	.	.	.	.	.	.
MCF-7 (ERR358487)	non-validated	ATP1A1	RP11-323A7.1(166064),RP11-470F18.1(10613)	+/+	./+	1:116939356	9:78183972	splice-site	intergenic	translocation	downstream	upstream	2	8	8	2391	16	high	.	.	.	.	.	.	.
MCF-7 (ERR358487)	non-validated	SULF2(273),RNU7-173P(40080)	SULF2	./+	-/-	20:46415633	20:46386207	intergenic	splice-site	inversion	downstream	downstream	10	4	4	587	117	high	.	.	mismatches(1)	.	.	.	.
MCF-7 (ERR358487)	non-validated	THSD4	SNRK	+/+	+/-	15:71704162	3:43396055	splice-site	intron	translocation/5'-5'	downstream	downstream	6	5	6	173	12	high	.	.	.	.	.	.	.
MCF-7 (ERR358487)	non-validated	TRIM33	TRIM33	-/-	-/+	1:115053172	1:115042966	splice-site	intron	inversion/5'-5'	upstream	upstream	6	7	4	506	16	high	.	.	.	.	.	.	.
MCF-7 (ERR358487)	confirmed_by_structural_variant	DHX30	EMCN	+/+	-/+	3:47859607	4:101342411	splice-site	intron	translocation/5'-5'	downstream	upstream	8	3	5	138	16	high	.	.	duplicates(1),mismappers(1)	.	.	.	.
MCF-7 (ERR358487)	validated	ZMYND8	USP32	-/-	-/-	20:45910846	17:58422969	splice-site	splice-site	translocation	upstream	downstream	2	6	8	1437	734	high	.	.	.	.	.	.	.
MCF-7 (ERR358487)	duplicate	ZMYND8	USP32	-/-	-/-	20:45915973	17:58422969	splice-site	splice-site	translocation	upstream	downstream	0	1	4	1352	734	high	.	.	.	.	.	.	.
MCF-7 (ERR358487)	validated	TBL1XR1	RGS17	-/-	-/-	3:176914909	6:153365178	splice-site	splice-site	translocation	upstream	downstream	7	6	2	202	22	high	.	.	inconsistently_clipped(1)	.	.	.	.
MCF-7 (ERR358487)	duplicate	TBL1XR1	RGS17	-/-	-/-	3:176849151	6:153365178	splice-site	splice-site	translocation	upstream	downstream	0	1	3	13	22	high	.	.	.	.	.	.	.
MCF-7 (ERR358487)	validated	VAV3	AP4B1-AS1	-/-	+/+	1:108138834	1:114442494	splice-site	splice-site	inversion	upstream	upstream	3	6	6	837	87	high	.	.	duplicates(1)	.	.	.	.
MCF-7 (ERR358487)	duplicate	VAV3	AP4B1-AS1	-/-	+/+	1:108138834	1:114440490	splice-site	splice-site	inversion	upstream	upstream	1	1	6	837	277	high	.	.	duplicates(1)	.	.	.	.
MCF-7 (ERR358487)	non-validated	SARS	KIAA1324	+/+	+/+	1:109774408	1:109704516	splice-site	splice-site	duplication	downstream	upstream	4	6	5	2519	1080	high	.	.	low_entropy(1)	.	.	.	.
MCF-7 (ERR358487)	non-validated	TRIM37	SKA2	-/-	-/-	17:57181654	17:57189706	splice-site	splice-site	duplication	upstream	downstream	2	6	7	1989	1211	high	.	.	duplicates(1)	.	.	.	.
MCF-7 (ERR358487)	duplicate	TRIM37	SKA2	-/-	-/-	17:57181654	17:57208728	splice-site	splice-site	duplication	upstream	downstream	0	1	8	1989	763	medium	.	.	duplicates(1)	.	.	.	.
MCF-7 (ERR358487)	duplicate	TRIM37	SKA2	-/-	-/-	17:57183802	17:57189706	splice-site	splice-site	duplication	upstream	downstream	0	1	1	2218	1211	medium	.	.	.	.	.	.	.
MCF-7 (ERR358487)	confirmed_by_structural_variant	TTC6	RP11-356O9.1	+/+	+/+	14:38065213	14:38033424	splice-site	exon	duplication	downstream	upstream	2	5	7	108	22	high	.	.	mismappers(2)	.	.	.	.
MCF-7 (ERR358487)	duplicate	TTC6	RP11-356O9.1	+/+	+/+	14:38065213	14:38047909	splice-site	splice-site	duplication	downstream	upstream	0	1	1	108	18	low	.	.	.	.	.	.	.
MCF-7 (ERR358487)	confirmed_by_structural_variant	RSBN1	VAV3	-/-	-/+	1:114354332	1:108152010	splice-site	intron	inversion/5'-5'	upstream	upstream	6	0	6	242	19	high	.	.	mismappers(16)	.	.	.	.
MCF-7 (ERR358487)	non-validated	VCL	RP11-574K11.8	+/+	+/+	10:75758133	10:75606093	splice-site	splice-site	duplication	downstream	upstream	4	4	4	139	10	high	.	.	.	.	.	.	.
MCF-7 (ERR358487)	non-validated	HIPK1	DENND2C	+/+	-/-	1:114484081	1:115161103	splice-site	splice-site	inversion	downstream	downstream	11	0	1	616	32	high	.	.	.	.	.	.	.
MCF-7 (ERR358487)	validated	ANKS1A	UHRF1BP1	+/+	+/+	6:34857376	6:34801994	splice-site	splice-site	duplication	downstream	upstream	2	5	5	92	111	high	.	.	.	.	.	.	.
MCF-7 (ERR358487)	non-validated	PPM1D	FLG	+/+	-/-	17:58678247	1:152287953	splice-site	splice-site	translocation	downstream	downstream	0	4	6	551	12	high	.	.	inconsistently_clipped(1)	.	.	.	.
MCF-7 (ERR358487)	non-validated	PGGT1B	CCDC112	-/-	-/-	5:114557521	5:114620605	splice-site	splice-site	duplication	upstream	downstream	1	3	6	335	174	high	.	.	.	.	.	.	.
MCF-7 (ERR358487)	non-validated	RP11-32B5.7	RP11-32B5.7(4990),RP11-32B5.4(14317)	-/-	./-	15:21967898	15:21973141	splice-site	intergenic	duplication	upstream	downstream	8	1	0	14	1	high	.	.	.	.	.	.	.
MCF-7 (ERR358487)	non-validated	TRIM4	GJC3	-/-	-/-	7:99516632	7:99521226	splice-site	splice-site	duplication	upstream	downstream	4	4	1	277	43	high	.	.	.	.	.	.	.
MCF-7 (ERR358487)	duplicate	TRIM4	GJC3	-/-	-/-	7:99516632	7:99527244	splice-site	splice-site	duplication	upstream	downstream	0	2	2	277	6	medium	.	.	.	.	.	.	.
MCF-7 (ERR358487)	non-validated	IMMP2L	IMMP2L(59467),DOCK4(104126)	-/-	./-	7:111161369	7:111262040	splice-site	intergenic	duplication	upstream	downstream	1	4	4	148	5	high	.	.	.	.	.	.	.
MCF-7 (ERR358487)	confirmed_by_structural_variant	TRIM37	PFDN4(216530),DOK5(31015)	-/-	./-	17:57165652	20:53061121	splice-site	intergenic	translocation	upstream	downstream	2	1	6	2712	5	high	.	.	mismappers(2)	.	.	.	.
MCF-7 (ERR358487)	confirmed_by_structural_variant	PLOD2	FNDC3B	-/-	+/-	3:145806373	3:172062033	splice-site	CDS	duplication/5'-5'	upstream	downstream	1	3	4	414	41	high	.	.	mismatches(1)	.	.	.	.
MCF-7 (ERR358487)	non-validated	CD180(18305),CTD-2187J20.1(52918)	RP11-434D9.1	./+	+/+	5:66510932	5:66915619	intergenic	splice-site	deletion	downstream	upstream	2	5	1	11	20	high	.	.	.	.	.	.	.
MCF-7 (ERR358487)	confirmed_by_structural_variant	TBL1XR1	RGS17(25356),RNA5SP224(2615)	-/-	./-	3:176914909	6:153477740	splice-site	intergenic	translocation	upstream	downstream	6	2	0	202	14	high	.	.	duplicates(1)	.	.	.	.
MCF-7 (ERR358487)	non-validated	NF2	HSCB	+/+	+/+	22:30079053	22:29147229	splice-site	splice-site	duplication	downstream	upstream	2	3	3	81	334	high	.	.	low_entropy(1)	.	.	.	.
MCF-7 (ERR358487)	duplicate	NF2	HSCB	+/+	+/+	22:30077590	22:29147229	splice-site	splice-site	duplication	downstream	upstream	1	4	2	112	334	high	.	.	.	.	.	.	.
MCF-7 (ERR358487)	duplicate	NF2	HSCB	+/+	+/+	22:30079053	22:29153066	splice-site	splice-site	duplication	downstream	upstream	1	0	0	81	281	medium	.	.	.	.	.	.	.
MCF-7 (ERR358487)	non-validated	TRRAP	DYNC1I1	+/+	+/+	7:98576527	7:95434033	splice-site	splice-site	duplication	downstream	upstream	1	0	7	275	3	high	.	.	.	.	.	.	.
MCF-7 (ERR358487)	validated	ATP1A1	ZFP64	+/+	-/-	1:116939356	20:50668675	splice-site	intron	translocation	downstream	downstream	1	1	6	2391	21	high	.	.	mismappers(6)	.	.	.	.
MCF-7 (ERR358487)	duplicate	ATP1A1	ZFP64	+/+	-/-	1:116939356	20:50668671	splice-site	splice-site	translocation	downstream	downstream	0	1	2	2391	21	high	.	.	mismappers(9)	.	.	.	.
MCF-7 (ERR358487)	validated	SULF2	PRICKLE2	-/-	-/-	20:46414087	3:64085601	splice-site	splice-site	translocation	upstream	downstream	4	2	2	83	19	high	.	.	duplicates(1)	.	.	.	.
MCF-7 (ERR358487)	duplicate	SULF2	PRICKLE2	-/-	-/-	20:46414579	3:64085601	splice-site	splice-site	translocation	upstream	downstream	3	0	0	19	19	medium	.	.	.	.	.	.	.
MCF-7 (ERR358487)	non-validated	ATP1A1	RP11-323A7.1(133404),RP11-470F18.1(43273)	+/+	./+	1:116939356	9:78151312	splice-site	intergenic	translocation	downstream	upstream	2	3	3	2391	4	high	.	.	.	.	.	.	.
MCF-7 (ERR358487)	non-validated	HOOK3	RP13-359K18.1(187175),RNU6-472P(17982)	+/+	./-	8:42761401	12:34058327	splice-site	intergenic	translocation	downstream	downstream	2	3	2	32	4	high	.	.	.	.	.	.	.
MCF-7 (ERR358487)	non-validated	MYO9A	PARP6	-/-	-/-	15:72320072	15:72560012	splice-site	splice-site	duplication	upstream	downstream	1	2	4	33	198	high	.	.	.	.	.	.	.
MCF-7 (ERR358487)	non-validated	CTD-2591A6.2	AP4S1	+/+	+/+	14:28787451	14:31535332	exon	splice-site	deletion	downstream	upstream	1	5	1	9	103	high	.	.	.	.	.	.	.
MCF-7 (ERR358487)	non-validated	CXorf23	MAP7D2	-/-	-/-	X:19955623	X:20082923	splice-site	splice-site	duplication	upstream	downstream	1	2	4	50	9	high	.	.	.	.	.	.	.
MCF-7 (ERR358487)	duplicate	CXorf23	MAP7D2	-/-	-/-	X:19968871	X:20082923	splice-site	splice-site	duplication	upstream	downstream	1	1	4	60	9	high	.	.	.	.	.	.	.
MCF-7 (ERR358487)	duplicate	CXorf23	MAP7D2	-/-	-/-	X:19955536	X:20082923	splice-site	splice-site	duplication	upstream	downstream	1	0	4	18	9	high	.	.	.	.	.	.	.
MCF-7 (ERR358487)	duplicate	CXorf23	MAP7D2	-/-	-/-	X:19983162	X:20082923	splice-site	splice-site	duplication	upstream	downstream	1	0	1	61	9	medium	.	.	.	.	.	.	.
MCF-7 (ERR358487)	non-validated	GNG7	FBXO16	-/-	-/-	19:2555147	8:28286253	splice-site	splice-site	translocation	upstream	downstream	0	2	5	16	22	high	.	.	.	.	.	.	.
MCF-7 (ERR358487)	validated	VAV3	AP4B1	-/-	-/+	1:108138834	1:114437782	splice-site	CDS	inversion/5'-5'	upstream	upstream	1	0	6	837	305	high	.	.	duplicates(1)	.	.	.	.
MCF-7 (ERR358487)	validated	PNPLA7	DPH7	-/-	-/-	9:140409831	9:140450100	splice-site	splice-site	duplication	upstream	downstream	3	1	3	25	228	high	.	.	.	.	.	.	.
MCF-7 (ERR358487)	confirmed_by_structural_variant	C2orf43	C2orf43(15218),AC012361.1(21431)	-/-	./-	2:21022797	2:21038100	splice-site	intergenic	duplication	upstream	downstream	0	6	1	53	8	high	.	.	.	.	.	.	.
MCF-7 (ERR358487)	non-validated	PRPF8	SMYD4	-/-	-/-	17:1558644	17:1715409	splice-site	splice-site	duplication	upstream	downstream	2	2	3	974	43	high	.	.	.	.	.	.	.
MCF-7 (ERR358487)	non-validated	RSRC1	OTOL1(132535),RP11-774I5.1(180432)	+/+	./+	3:158015864	3:161354265	splice-site	intergenic	deletion	downstream	upstream	2	2	2	290	8	high	.	.	mismappers(1)	.	.	.	.
MCF-7 (ERR358487)	non-validated	SND1	RP11-3B12.2	+/+	+/+	7:127544872	7:124969736	splice-site	splice-site	duplication	downstream	upstream	1	2	3	931	3	high	.	.	.	.	.	.	.
MCF-7 (ERR358487)	duplicate	SND1	RP11-3B12.2	+/+	+/+	7:127544872	7:124987179	splice-site	splice-site	duplication	downstream	upstream	0	2	0	931	2	medium	.	.	.	.	.	.	.
MCF-7 (ERR358487)	non-validated	JUP	CRTC1	-/-	+/-	17:39927899	19:18811801	splice-site	intron	translocation/5'-5'	upstream	downstream	1	1	4	1389	3	high	.	.	.	.	.	.	.
MCF-7 (ERR358487)	confirmed_by_structural_variant	RSBN1	DCLRE1B	-/-	+/+	1:114354332	1:114448091	splice-site	5'UTR	inversion	upstream	upstream	2	1	3	242	483	high	.	.	.	.	.	.	.
MCF-7 (ERR358487)	non-validated	RP11-264B17.2	RP11-264B17.2	-/.	-/.	16:28968579	16:28969359	intron	intron	duplication	upstream	downstream	1	2	3	17	81	high	.	.	duplicates(1)	.	.	.	.
MCF-7 (ERR358487)	non-validated	HAGH	MEIOB	-/-	-/-	16:1866894	16:1912117	splice-site	splice-site	duplication	upstream	downstream	3	1	2	536	6	high	.	.	mismatches(1)	.	.	.	.
MCF-7 (ERR358487)	duplicate	HAGH	MEIOB	-/-	-/-	16:1866894	16:1910476	splice-site	splice-site	duplication	upstream	downstream	0	0	0	536	13	medium	.	.	low_entropy(1)	.	.	.	.
MCF-7 (ERR358487)	non-validated	CRTC1	JUP(607),LEPREL4(14409)	+/+	./+	19:18794638	17:39943790	splice-site	intergenic	translocation	downstream	upstream	2	0	3	73	5	high	.	.	.	.	.	.	.
MCF-7 (ERR358487)	non-validated	SYT1	RP11-171L9.1(188635),RP11-123M21.2(64216)	+/+	./+	12:79693331	12:79123090	splice-site	intergenic	duplication	downstream	upstream	0	3	2	74	4	high	.	.	.	.	.	.	.
MCF-7 (ERR358487)	non-validated	WDHD1	LRRC42	-/-	+/-	14:55411050	1:54420493	splice-site	intron	translocation/5'-5'	upstream	downstream	3	1	1	257	13	high	.	.	.	.	.	.	.
MCF-7 (ERR358487)	duplicate	LRRC42	WDHD1	+/-	-/-	1:54420344	14:55408408	intron	splice-site	translocation/3'-3'	upstream	downstream	0	3	2	8	287	high	.	.	inconsistently_clipped(1)	.	.	.	.
MCF-7 (ERR358487)	non-validated	RP5-947P14.1(173599),RP11-478L17.1(286244)	BCAS1	./+	-/-	1:106800720	20:52612589	intergenic	splice-site	translocation	downstream	downstream	2	1	2	159	116	high	.	.	.	.	.	.	.
MCF-7 (ERR358487)	non-validated	ACTR3	AC104653.1(3396),snoU13(1381)	+/+	./+	2:114674585	2:114604329	splice-site	intergenic	duplication	downstream	upstream	2	1	2	837	1	high	.	.	.	.	.	.	.
MCF-7 (ERR358487)	non-validated	WDR88	WDR88	+/+	+/+	19:33665941	19:33664995	intron	intron	duplication	downstream	upstream	1	1	3	17	10	high	.	.	.	.	.	.	.
MCF-7 (ERR358487)	non-validated	SQLE	LINC00964	+/+	+/+	8:126030969	8:125963058	splice-site	splice-site	duplication	downstream	upstream	1	2	2	493	3	high	.	.	.	.	.	.	.
MCF-7 (ERR358487)	non-validated	AC139099.4(2739),AC139099.6(31650)	MYT1	./-	+/+	17:81128115	20:62830215	intergenic	splice-site	translocation	upstream	upstream	3	0	1	6	10	high	.	.	.	.	.	.	.
MCF-7 (ERR358487)	confirmed_by_structural_variant	FAM65C	EYA2	-/-	+/+	20:49286980	20:45797787	intron	splice-site	inversion	upstream	upstream	2	2	0	3	6	high	.	.	.	.	.	.	.
MCF-7 (ERR358487)	non-validated	GNG7	ZNF395	-/-	-/-	19:2555147	8:28232899	splice-site	splice-site	translocation	upstream	downstream	0	1	3	16	19	high	.	.	mismappers(1)	.	.	.	.
MCF-7 (ERR358487)	duplicate	GNG7	ZNF395	-/-	-/-	19:2555147	8:28218659	splice-site	splice-site	translocation	upstream	downstream	0	1	2	16	153	high	.	.	.	.	.	.	.
MCF-7 (ERR358487)	confirmed_by_structural_variant	ATP9A	RP11-347D21.1	-/-	+/+	20:50255882	20:46580501	splice-site	splice-site	inversion	upstream	upstream	1	2	1	248	16	high	.	.	.	.	.	.	.
MCF-7 (ERR358487)	non-validated	SMYD3	AHCTF1	-/-	-/-	1:246669412	1:247081679	intron	splice-site	duplication	upstream	downstream	0	1	3	0	127	high	.	.	.	.	.	.	.
MCF-7 (ERR358487)	non-validated	WWOX	RP11-281J9.2	+/+	-/+	16:78466649	16:78050023	splice-site	intron	duplication/5'-5'	downstream	upstream	1	0	3	65	4	high	.	.	.	.	.	.	.
MCF-7 (ERR358487)	non-validated	RINT1	TRRAP	+/+	+/+	7:105206095	7:98580887	splice-site	splice-site	duplication	downstream	upstream	2	0	2	312	275	high	.	.	.	.	.	.	.
MCF-7 (ERR358487)	non-validated	SUMF1	AC026202.5(514736),AC027119.1(191347)	-/-	./-	3:4490950	3:5813182	splice-site	intergenic	duplication	upstream	downstream	1	1	2	441	4	high	.	.	.	.	.	.	.
MCF-7 (ERR358487)	confirmed_by_structural_variant	ARRB1	KLHL35	-/-	-/-	11:75062632	11:75137646	splice-site	CDS	duplication	upstream	downstream	0	1	3	52	16	high	.	.	duplicates(1)	.	.	.	.
MCF-7 (ERR358487)	duplicate	ARRB1	KLHL35	-/-	-/-	11:75062632	11:75134924	splice-site	splice-site	duplication	upstream	downstream	1	0	0	52	31	low	.	.	.	.	.	.	.
MCF-7 (ERR358487)	validated	VAV3	RP5-1073O3.2	-/-	+/+	1:108138834	1:114357009	splice-site	splice-site	inversion	upstream	upstream	0	1	3	837	15	high	.	.	.	.	.	.	.
MCF-7 (ERR358487)	confirmed_by_structural_variant	DDHD1	AL163953.3	-/-	+/-	14:53618979	14:53708598	splice-site	intron	duplication/5'-5'	upstream	downstream	1	0	3	120	2	high	.	.	.	.	.	.	.
MCF-7 (ERR358487)	non-validated	ZNF595	POFUT1	+/+	+/-	4:60046	20:30823736	splice-site	3'UTR	translocation/5'-5'	downstream	downstream	1	1	2	753	238	high	.	.	.	.	.	.	.
MCF-7 (ERR358487)	confirmed_by_structural_variant	ATP1A1	RN7SL603P(107503),ZFP64(3327)	+/+	./-	1:116939356	20:50664875	splice-site	intergenic	translocation	downstream	downstream	2	1	1	2391	4	high	.	.	duplicates(1)	.	.	.	.
MCF-7 (ERR358487)	non-validated	ATP1A1	RP11-470F18.1	+/+	+/+	1:116939356	9:78203277	splice-site	exon	translocation	downstream	upstream	1	1	2	2391	3	high	.	.	.	.	.	.	.
MCF-7 (ERR358487)	confirmed_by_structural_variant	TAOK1	NUFIP2	+/+	-/+	17:27778698	17:27606385	splice-site	intron	duplication/5'-5'	downstream	upstream	3	0	1	137	20	high	.	.	.	.	.	.	.
MCF-7 (ERR358487)	confirmed_by_structural_variant	ARHGAP10	RP11-752L20.1(6010),EDNRA(15586)	+/+	./+	4:148944564	4:148386483	splice-site	intergenic	duplication	downstream	upstream	1	0	2	96	3	high	.	.	.	.	.	.	.
MCF-7 (ERR358487)	confirmed_by_structural_variant	ARHGAP10	EDNRA	+/+	+/+	4:148944564	4:148406764	splice-site	splice-site	duplication	downstream	upstream	0	1	2	96	2	high	.	.	.	.	.	.	.
MCF-7 (ERR358487)	duplicate	ARHGAP10	EDNRA	+/+	+/+	4:148944564	4:148441003	splice-site	splice-site	duplication	downstream	upstream	1	0	1	96	3	high	.	.	.	.	.	.	.
MCF-7 (ERR358487)	validated	NAV1	GPR37L1	+/+	+/+	1:201687883	1:202096869	splice-site	splice-site	deletion	downstream	upstream	2	0	1	24	13	high	.	.	.	.	.	.	.
MCF-7 (ERR358487)	duplicate	NAV1	GPR37L1	+/+	+/+	1:201709204	1:202096869	splice-site	splice-site	deletion/read-through	downstream	upstream	2	1	3	30	13	medium	.	.	mismappers(1)	.	.	.	.
MCF-7 (ERR358487)	duplicate	MYO9A	CELF6	-/-	-/-	15:72320072	15:72560012	splice-site	splice-site	duplication	upstream	downstream	1	1	1	33	198	high	.	.	.	.	.	.	.
MCF-7 (ERR358487)	non-validated	SMYD3	NLRP3	-/-	+/-	1:246670356	1:247602835	splice-site	intron	duplication/5'-5'	upstream	downstream	1	1	1	75	4	high	.	.	inconsistently_clipped(1)	.	.	.	.
MCF-7 (ERR358487)	non-validated	TCF12	TEX9	+/+	+/+	15:57213296	15:56665639	splice-site	splice-site	duplication	downstream	upstream	0	1	2	160	64	high	.	.	.	.	.	.	.
MCF-7 (ERR358487)	duplicate	TCF12	TEX9	+/+	+/+	15:57213296	15:56657777	splice-site	splice-site	duplication	downstream	upstream	0	1	2	160	60	high	.	.	.	.	.	.	.
MCF-7 (ERR358487)	non-validated	C9orf156	RNU6-918P(3478),NANS(20926)	-/-	./-	9:100672242	9:100798095	splice-site	intergenic	duplication	upstream	downstream	1	2	0	247	4	high	.	.	.	.	.	.	.
MCF-7 (ERR358487)	non-validated	RSRC1	RP11-774I5.1(382829),TOMM22P6(281804)	+/+	./+	3:158015864	3:161922525	splice-site	intergenic	deletion	downstream	upstream	1	1	1	290	2	high	.	.	.	.	.	.	.
MCF-7 (ERR358487)	non-validated	UCK2	RXRG(9256),RP11-280O1.2(22389)	+/+	./+	1:165865569	1:165423689	splice-site	intergenic	duplication	downstream	upstream	2	0	1	559	1	high	.	.	.	.	.	.	.
MCF-7 (ERR358487)	non-validated	AC131097.3	TPGS1	+/+	+/+	2:242830000	19:518889	intron	splice-site	translocation	downstream	upstream	1	1	1	23	458	high	.	.	.	.	.	.	.
MCF-7 (ERR358487)	non-validated	AC131097.3	SERINC2	+/+	+/+	2:242830000	1:31905814	intron	splice-site	translocation	downstream	upstream	1	1	1	23	128	high	.	.	.	.	.	.	.
MCF-7 (ERR358487)	validated	RP11-1021N1.1	ABCC1	+/+	+/+	16:15528616	16:16170183	splice-site	splice-site	deletion	downstream	upstream	1	2	0	17	143	high	.	.	.	.	.	.	.
MCF-7 (ERR358487)	duplicate	C16orf45	ABCC1	+/+	+/+	16:15528616	16:16170183	splice-site	splice-site	deletion	downstream	upstream	1	2	0	17	143	high	.	.	.	.	.	.	.
MCF-7 (ERR358487)	confirmed_by_structural_variant	UNK	ABCA5(1526),SNORA40(26363)	+/+	./-	17:73816189	17:67324911	splice-site	intergenic	inversion	downstream	downstream	2	0	1	159	1	high	.	.	.	.	.	.	.
MCF-7 (ERR358487)	non-validated	THSD4	AC104434.1(51712),SNRK(23929)	+/+	./-	15:71704162	3:43304075	splice-site	intergenic	translocation	downstream	downstream	0	2	1	173	2	high	.	.	.	.	.	.	.
MCF-7 (ERR358487)	non-validated	ESR1	NDUFAF2	+/+	+/+	6:152201906	5:60368952	splice-site	splice-site	translocation	downstream	upstream	1	1	1	481	1117	high	.	.	.	.	.	.	.
MCF-7 (ERR358487)	confirmed_by_structural_variant	FRMD8(5579),NEAT1(3670)	RARA	./-	+/+	11:65186575	17:38504568	intergenic	splice-site	translocation	upstream	upstream	0	1	2	0	332	high	.	.	.	.	.	.	.
MCF-7 (ERR358487)	non-validated	AC006486.9	NOC4L	-/-	+/+	19:42759130	12:132635526	splice-site	splice-site	translocation	upstream	upstream	0	1	2	611	114	high	.	.	.	.	.	.	.
MCF-7 (ERR358487)	confirmed_by_structural_variant	SLC25A19	RN7SL603P(41440),ZFP64(69390)	-/-	./-	17:73279504	20:50598812	splice-site	intergenic	translocation	upstream	downstream	1	0	1	168	4	high	.	.	mismappers(2)	.	.	.	.
MCF-7 (ERR358487)	non-validated	C10orf112	UBE2V2P1(102905),C10orf112(48775)	+/+	./+	10:19981483	10:19444004	splice-site	intergenic	duplication	downstream	upstream	1	0	1	1	0	high	.	.	.	.	.	.	.
MCF-7 (ERR358487)	non-validated	KISS1R	RORA	+/+	-/+	19:917746	15:60994613	splice-site	intron	translocation/5'-5'	downstream	upstream	0	1	1	31	1	high	.	.	.	.	.	.	.
MCF-7 (ERR358487)	confirmed_by_structural_variant	SZRD1	FBXO42	+/+	-/+	1:16722100	1:16667557	3'UTR	intron	duplication/5'-5'	downstream	upstream	0	0	128	829	205	medium	.	.	duplicates(12),mismappers(14)	.	.	.	.
MCF-7 (ERR358487)	non-validated	NCOA3	RP11-478L17.1(205547),RP11-110F24.1(29932)	+/+	./+	20:46131238	1:107292913	intron	intergenic	translocation	downstream	upstream	17	4	26	205	166	medium	.	.	.	.	.	.	.
MCF-7 (ERR358487)	validated	POP1	MATN2	+/+	+/+	8:99129618	8:99042690	splice-site	splice-site	duplication	downstream	upstream	0	39	0	56	195	medium	.	.	duplicates(3),mismappers(4)	.	.	.	.
MCF-7 (ERR358487)	non-validated	NUP98	RIC3	-/-	-/-	11:3735107	11:8148136	CDS	intron	duplication	upstream	downstream	3	9	19	235	24	medium	.	.	mismatches(1)	.	.	.	.
MCF-7 (ERR358487)	validated	MTAP	CDKN2B-AS1	+/+	+/+	9:21818201	9:22029432	splice-site	splice-site	deletion/read-through	downstream	upstream	3	3	21	84	13	medium	.	.	duplicates(1),mismatches(1)	.	.	.	.
MCF-7 (ERR358487)	duplicate	MTAP	CDKN2B-AS1	+/+	+/+	9:21818201	9:21995047	splice-site	splice-site	deletion/read-through	downstream	upstream	1	0	23	84	20	medium	.	.	duplicates(1)	.	.	.	.
MCF-7 (ERR358487)	duplicate	MTAP	CDKN2B-AS1	+/+	+/+	9:21818201	9:22092307	splice-site	splice-site	deletion/read-through	downstream	upstream	1	3	15	84	11	medium	.	.	duplicates(1)	.	.	.	.
MCF-7 (ERR358487)	duplicate	MTAP	CDKN2B-AS1	+/+	+/+	9:21818201	9:22046750	splice-site	splice-site	deletion/read-through	downstream	upstream	0	1	17	84	13	medium	.	.	duplicates(1)	.	.	.	.
MCF-7 (ERR358487)	duplicate	MTAP	CDKN2B-AS1	+/+	+/+	9:21818201	9:22097257	splice-site	splice-site	deletion/read-through	downstream	upstream	4	1	11	84	22	medium	.	.	duplicates(1)	.	.	.	.
MCF-7 (ERR358487)	duplicate	MTAP	CDKN2B-AS1	+/+	+/+	9:21818201	9:22096371	splice-site	splice-site	deletion/read-through	downstream	upstream	2	1	13	84	19	medium	.	.	duplicates(1)	.	.	.	.
MCF-7 (ERR358487)	duplicate	MTAP	CDKN2B-AS1	+/+	+/+	9:21818201	9:22112319	splice-site	splice-site	deletion/read-through	downstream	upstream	3	3	8	84	51	medium	.	.	duplicates(1)	.	.	.	.
MCF-7 (ERR358487)	duplicate	MTAP	CDKN2B-AS1	+/+	+/+	9:21818201	9:22120503	splice-site	splice-site	deletion/read-through	downstream	upstream	6	1	4	84	59	medium	.	.	.	.	.	.	.
MCF-7 (ERR358487)	duplicate	MTAP	CDKN2B-AS1	+/+	+/+	9:21818201	9:22120199	splice-site	splice-site	deletion/read-through	downstream	upstream	1	0	4	84	43	medium	.	.	.	.	.	.	.
MCF-7 (ERR358487)	confirmed_by_structural_variant	ZNF217	BRIP1	-/-	-/+	20:52185501	17:59868733	3'UTR	intron	translocation/5'-5'	upstream	upstream	13	1	13	1010	36	medium	.	.	duplicates(1),mismappers(3),mismatches(2)	.	.	.	.
MCF-7 (ERR358487)	confirmed_by_structural_variant	MTAP	CDKN2A	+/+	-/+	9:21819535	9:21989620	intron	exon	deletion/read-through/5'-5'	downstream	upstream	1	4	21	19	27	medium	.	.	mismatches(4)	.	.	.	.
MCF-7 (ERR358487)	non-validated	RAB3GAP1	TMEM163	+/+	-/+	2:135810055	2:135421204	splice-site	intron	duplication/5'-5'	downstream	upstream	0	19	0	241	26	medium	.	.	duplicates(1),low_entropy(1)	.	.	.	.
MCF-7 (ERR358487)	confirmed_by_structural_variant	TDRKH	PRICKLE2	-/.	-/.	1:151745808	3:64319056	intron	intron	translocation	upstream	downstream	6	2	9	22	6	medium	.	.	.	.	.	.	.
MCF-7 (ERR358487)	non-validated	PGGT1B	CTNNAP1	-/.	-/.	5:114555346	5:114725548	intron	exon	duplication	upstream	downstream	7	6	4	10	9	medium	.	.	.	.	.	.	.
MCF-7 (ERR358487)	validated	PLCG1	TOP1	+/+	+/+	20:39766498	20:39729878	splice-site	CDS	duplication	downstream	upstream	8	4	3	465	957	medium	.	.	mismatches(1)	.	.	.	.
MCF-7 (ERR358487)	duplicate	PLCG1	TOP1	+/+	+/+	20:39766498	20:39729849	splice-site	splice-site	duplication	downstream	upstream	4	1	4	465	999	medium	.	.	.	.	.	.	.
MCF-7 (ERR358487)	duplicate	PLCG1	TOP1	+/+	+/+	20:39765675	20:39729849	splice-site	splice-site	duplication	downstream	upstream	0	6	0	74	999	medium	.	.	.	.	.	.	.
MCF-7 (ERR358487)	non-validated	TRAPPC8	RP11-326K13.2(6423),RNF125(44404)	-/-	./-	18:29487530	18:29553931	CDS	intergenic	duplication	upstream	downstream	6	3	4	128	13	medium	.	.	mismappers(14)	.	.	.	.
MCF-7 (ERR358487)	non-validated	E2F6	GREB1	-/.	+/.	2:11589480	2:11730346	intron	intron	duplication/5'-5'	upstream	downstream	2	5	6	23	54	medium	.	.	.	.	.	.	.
MCF-7 (ERR358487)	confirmed_by_structural_variant	TEX14	PTPRT	-/-	-/+	17:56703154	20:41003197	intron	intron	translocation/5'-5'	upstream	upstream	4	1	7	21	10	medium	.	.	mismappers(12)	.	.	.	.
MCF-7 (ERR358487)	non-validated	MYT1	PCMTD2	+/+	+/+	20:62831275	20:62899240	splice-site	splice-site	deletion/read-through	downstream	upstream	1	7	4	13	239	medium	.	.	mismappers(1)	.	.	.	.
MCF-7 (ERR358487)	duplicate	PCMTD2	MYT1	+/+	+/+	20:62887223	20:62830215	splice-site	splice-site	duplication	downstream	upstream	4	0	0	195	10	medium	.	.	.	.	.	.	.
MCF-7 (ERR358487)	non-validated	CTC-338M12.4	OR2V1(7076),OR2V2(22563)	+/+	./+	5:180674853	5:180559380	exon	intergenic	duplication	downstream	upstream	0	5	6	77	11	medium	.	.	mismappers(4)	.	.	.	.
MCF-7 (ERR358487)	confirmed_by_structural_variant	NAV1	RP11-510N19.3(1078),CRIP1P3(55747)	+/+	./+	1:201709204	1:202010140	splice-site	intergenic	deletion/read-through	downstream	upstream	0	3	7	30	26	medium	.	.	mismappers(18)	.	.	.	.
MCF-7 (ERR358487)	non-validated	MTAP	RP11-408N14.1	+/+	-/+	9:21818201	9:22210663	splice-site	intron	deletion/read-through/5'-5'	downstream	upstream	3	4	3	84	9	medium	.	.	.	.	.	.	.
MCF-7 (ERR358487)	duplicate	CTD-2192J16.24	HOOK2	-/-	-/-	19:12775209	19:12928493	intron	intron	duplication	upstream	downstream	5	0	5	188	165	medium	.	.	duplicates(1)	.	.	.	.
MCF-7 (ERR358487)	non-validated	POFUT1	RP11-1281K21.7(60384),RP11-241F15.1(179627)	+/+	./+	20:30823874	4:49309316	3'UTR	intergenic	translocation	downstream	upstream	0	8	1	264	9	medium	.	.	.	.	.	.	.
MCF-7 (ERR358487)	confirmed_by_structural_variant	ZBTB25	RP11-973N13.3(3662),RP11-973N13.2(45)	-/-	./-	14:64952683	14:65066916	3'UTR	intergenic	duplication	upstream	downstream	0	0	8	117	54	medium	.	.	.	.	.	.	.
MCF-7 (ERR358487)	non-validated	ARSG	AMZ2	+/+	+/+	17:66287709	17:66246935	splice-site	splice-site	duplication	downstream	upstream	1	3	3	58	1386	medium	.	.	.	.	.	.	.
MCF-7 (ERR358487)	duplicate	ARSG	AMZ2	+/+	+/+	17:66287709	17:66247191	splice-site	splice-site	duplication	downstream	upstream	0	4	2	58	1264	medium	.	.	.	.	.	.	.
MCF-7 (ERR358487)	confirmed_by_structural_variant	DHX30	RP11-588P8.1(165043),EMCN(14793)	+/+	./+	3:47866614	4:101301705	CDS	intergenic	translocation	downstream	upstream	5	0	1	165	4	medium	.	.	.	.	.	.	.
MCF-7 (ERR358487)	non-validated	HIPK1	RNU7-14P(71694),AC006076.1(59371)	+/+	./+	1:114484080	20:52356991	CDS	intergenic	translocation	downstream	upstream	0	0	6	615	75	medium	.	.	.	.	.	.	.
MCF-7 (ERR358487)	non-validated	DCP1A	SELK(47659),CABYRP1(108102)	-/-	./-	3:53326106	3:53973674	CDS	intergenic	duplication	upstream	downstream	0	0	5	76	15	medium	.	.	.	.	.	.	.
MCF-7 (ERR358487)	non-validated	NCOA3	ZNF217	+/+	-/+	20:46267231	20:52211559	intron	intron	deletion/5'-5'	downstream	upstream	0	1	4	17	6	medium	.	.	low_entropy(1),mismappers(7)	.	.	.	.
MCF-7 (ERR358487)	non-validated	SRGAP2B	SRGAP2C	+/+	+/+	1:144053514	1:121107201	exon	exon	duplication	downstream	upstream	0	0	5	4	0	medium	.	.	.	.	.	.	.
MCF-7 (ERR358487)	validated	MTAP	UBA52P6	+/+	+/+	9:21818201	9:22012127	splice-site	5'UTR	deletion/read-through	downstream	upstream	1	2	1	84	6	medium	.	.	.	.	.	.	.
MCF-7 (ERR358487)	non-validated	CTD-2280E9.1	BTNL10	-/-	-/+	5:121719165	1:228696402	splice-site	exon	translocation/5'-5'	upstream	upstream	0	4	0	139	30	medium	.	.	.	.	.	.	.
MCF-7 (ERR358487)	non-validated	TRRAP	AC002451.3(135647),DYNC1I1(23188)	+/+	./+	7:98579449	7:95378678	CDS	intergenic	duplication	downstream	upstream	0	0	4	291	9	medium	.	.	.	.	.	.	.
MCF-7 (ERR358487)	validated	CHEK2	CTA-292E10.6	-/-	+/-	22:29121231	22:29206922	splice-site	intron	duplication/5'-5'	upstream	downstream	1	1	2	296	6	medium	.	.	.	.	.	.	.
MCF-7 (ERR358487)	confirmed_by_structural_variant	CCDC170(11281),ESR1(24217)	CCDC170	./+	+/+	6:151953609	6:151857453	intergenic	splice-site	duplication	downstream	upstream	1	0	3	4	92	medium	.	.	.	.	.	.	.
MCF-7 (ERR358487)	validated	PTPRG	CCDC129	+/+	+/+	3:61989171	7:31681790	splice-site	splice-site	translocation	downstream	upstream	0	3	0	39	4	medium	.	.	.	.	.	.	.
MCF-7 (ERR358487)	non-validated	AGAP3	HOXD11	+/+	+/+	7:150783901	2:176972316	CDS	CDS	translocation	downstream	upstream	3	0	0	58	0	medium	.	.	mismappers(4),mismatches(1)	.	.	.	.
MCF-7 (ERR358487)	non-validated	RP11-452L6.5	RP11-452L6.5	-/.	-/.	16:31467787	16:31468831	intron	exon	duplication	upstream	downstream	2	0	1	4	41	medium	.	.	.	.	.	.	.
MCF-7 (ERR358487)	non-validated	SLC35F4	C14orf105(9347),SLC35F4(60708)	-/-	./-	14:58032667	14:57969932	intron	intergenic	deletion/read-through	upstream	downstream	0	0	3	16	20	medium	.	.	.	.	.	.	.
MCF-7 (ERR358487)	non-validated	POFUT1	RP11-782C8.8(36303),RP11-435B5.1(60331)	+/+	./-	20:30823874	1:143282513	3'UTR	intergenic	translocation	downstream	downstream	0	2	1	264	2	medium	.	.	.	.	.	.	.
MCF-7 (ERR358487)	non-validated	RP11-403B2.7	RP11-403B2.6	-/-	-/-	15:20961259	15:20965236	splice-site	splice-site	duplication	upstream	downstream	3	0	0	4	1	medium	.	.	.	.	.	.	.
MCF-7 (ERR358487)	validated	AHCYL1	RAD51C	+/+	+/+	1:110527794	17:56811479	splice-site	splice-site	translocation	downstream	upstream	1	1	1	900	1322	medium	.	.	.	.	.	.	.
MCF-7 (ERR358487)	validated	RPS6KB1	VMP1	+/+	+/+	17:57970686	17:57915656	splice-site	splice-site	duplication	downstream	upstream	2	0	1	1497	1978	medium	.	.	.	.	.	.	.
MCF-7 (ERR358487)	duplicate	RPS6KB1	VMP1	+/+	+/+	17:57992064	17:57915656	splice-site	splice-site	duplication	downstream	upstream	0	1	1	1864	1978	medium	.	.	.	.	.	.	.
MCF-7 (ERR358487)	confirmed_by_structural_variant	COQ2	FAM175A	-/-	-/-	4:84182942	4:84402076	3'UTR	intron	duplication	upstream	downstream	0	0	2	8	29	medium	.	.	mismappers(1)	.	.	.	.
MCF-7 (ERR358487)	confirmed_by_structural_variant	RP5-1073O3.2	PTPN22	+/+	-/-	1:114355447	1:114375760	splice-site	splice-site	inversion	downstream	downstream	1	1	0	11	6	medium	.	.	.	.	.	.	.
MCF-7 (ERR358487)	duplicate	RP5-1073O3.2	PTPN22	+/+	-/-	1:114355234	1:114375760	splice-site	splice-site	inversion	downstream	downstream	0	1	0	12	6	medium	.	.	.	.	.	.	.
MCF-7 (ERR358487)	non-validated	SH3D19	RP11-731D1.4	-/-	-/-	4:152246393	4:152255141	splice-site	splice-site	duplication	upstream	downstream	1	0	1	68	1	medium	.	.	.	.	.	.	.
MCF-7 (ERR358487)	confirmed_by_structural_variant	DYNC1H1	DYNC1H1	+/+	+/+	14:102500789	14:102466326	splice-site	splice-site	duplication/non-canonical_splicing	downstream	upstream	33	18	25	368	394	low	.	.	.	.	.	.	.
MCF-7 (ERR358487)	non-validated	TRIO	TRIO	+/+	+/+	5:14316852	5:14316622	splice-site	splice-site	duplication/non-canonical_splicing	downstream	upstream	6	9	0	105	121	low	.	.	inconsistently_clipped(2),same_gene(2)	.	.	.	.
MCF-7 (ERR358487)	non-validated	ARMC9	ARMC9	+/+	+/+	2:232143171	2:232135695	splice-site	splice-site	duplication/non-canonical_splicing	downstream	upstream	4	5	4	82	83	low	.	.	.	.	.	.	.
MCF-7 (ERR358487)	validated	C19orf60	TMEM59L	+/+	+/+	19:18699710	19:18724682	splice-site	splice-site	deletion/read-through	downstream	upstream	0	10	0	534	18	low	.	.	.	.	.	.	.
MCF-7 (ERR358487)	duplicate	C19orf60	TMEM59L	+/+	+/+	19:18699887	19:18724682	splice-site	splice-site	deletion/read-through	downstream	upstream	1	2	2	438	18	low	.	.	.	.	.	.	.
MCF-7 (ERR358487)	non-validated	TRMT61B	PPP1CB	-/-	+/-	2:29083984	2:29022180	splice-site	3'UTR	deletion/read-through/5'-5'	upstream	downstream	4	2	3	77	1275	low	.	.	low_entropy(2)	.	.	.	.
MCF-7 (ERR358487)	confirmed_by_structural_variant	ARFGEF1	ARFGEF1	-/-	-/-	8:68139682	8:68152525	splice-site	splice-site	duplication/non-canonical_splicing	upstream	downstream	4	1	3	101	80	low	.	.	.	.	.	.	.
MCF-7 (ERR358487)	non-validated	ARPC1A	CPSF4	+/+	+/+	7:98923627	7:99042412	splice-site	splice-site	deletion/read-through	downstream	upstream	2	5	0	1628	525	low	.	.	low_entropy(1)	.	.	.	.
MCF-7 (ERR358487)	non-validated	RP11-435O5.2	FANCC	-/-	-/-	9:98189006	9:98011651	splice-site	splice-site	deletion/read-through	upstream	downstream	0	4	1	51	136	low	.	.	.	.	.	.	.
MCF-7 (ERR358487)	non-validated	HOXC13(3592),HOXC12(4698)	HOXC11	./+	+/+	12:54343920	12:54368965	intergenic	splice-site	deletion/read-through	downstream	upstream	1	2	2	29	205	low	.	.	.	.	.	.	.
MCF-7 (ERR358487)	non-validated	SLC12A7(18191),CTD-3080P12.3(42915)	SLC12A7	./-	-/-	5:1130341	5:1096492	intergenic	intron	deletion/read-through	upstream	downstream	0	1	4	28	1	low	.	.	mismatches(1)	.	.	.	.
MCF-7 (ERR358487)	non-validated	LINC00176	TCEA2	+/+	+/+	20:62669555	20:62693783	splice-site	splice-site	deletion/read-through	downstream	upstream	1	1	3	60	16	low	.	.	.	.	.	.	.
MCF-7 (ERR358487)	duplicate	LINC00176	TCEA2	+/+	+/+	20:62669555	20:62697829	splice-site	splice-site	deletion/read-through	downstream	upstream	0	0	0	60	275	low	.	.	low_entropy(1)	.	.	.	.
MCF-7 (ERR358487)	non-validated	CCDC7	C10orf68	+/+	+/+	10:32762951	10:33067905	splice-site	splice-site	deletion/read-through	downstream	upstream	0	1	3	30	3	low	.	.	inconsistently_clipped(1)	.	.	.	.
MCF-7 (ERR358487)	duplicate	CCDC7	C10orf68	+/+	+/+	10:32762951	10:33103298	splice-site	splice-site	deletion/read-through	downstream	upstream	0	1	1	30	5	low	.	.	.	.	.	.	.
MCF-7 (ERR358487)	duplicate	CCDC7	C10orf68	+/+	+/+	10:32854548	10:32871997	splice-site	splice-site	deletion/read-through	downstream	upstream	0	0	0	7	4	low	.	.	read_through(1)	.	.	.	.
MCF-7 (ERR358487)	duplicate	CCDC7	C10orf68	+/+	+/+	10:32854548	10:32873160	splice-site	splice-site	deletion/read-through	downstream	upstream	0	0	0	7	8	low	.	.	read_through(1)	.	.	.	.
MCF-7 (ERR358487)	non-validated	RP11-254F7.4(1155),RRM2(108)	CYS1	./-	-/-	2:10262347	2:10206083	intergenic	splice-site	deletion/read-through	upstream	downstream	2	1	1	19	5	low	.	.	.	.	.	.	.
MCF-7 (ERR358487)	non-validated	TP53BP1	TP53BP1	-/-	-/-	15:43724392	15:43773220	splice-site	splice-site	duplication/non-canonical_splicing	upstream	downstream	2	1	1	166	151	low	.	.	.	.	.	.	.
MCF-7 (ERR358487)	non-validated	SLC35F4	C14orf105	-/-	-/-	14:58032668	14:57945361	intron	3'UTR	deletion/read-through	upstream	downstream	0	2	2	16	14	low	.	.	.	.	.	.	.
MCF-7 (ERR358487)	non-validated	B3GALT5	AF064860.5	+/.	+/.	21:40984994	21:41085853	intron	intron	deletion/read-through	downstream	upstream	1	0	2	46	1	low	.	.	.	.	.	.	.
MCF-7 (ERR358487)	confirmed_by_structural_variant	NAALADL2	NAALADL2	+/+	+/+	3:175189546	3:175041964	splice-site	splice-site	duplication/non-canonical_splicing	downstream	upstream	3	0	0	23	22	low	.	.	.	.	.	.	.
MCF-7 (ERR358487)	non-validated	MRPS31	MRPS31	-/-	-/-	13:41326464	13:41328908	exon	intron	duplication	upstream	downstream	2	0	1	40	4	low	.	.	.	.	.	.	.
MCF-7 (ERR358487)	non-validated	CHD2	FAM174B(6968),RN7SL599P(39651)	+/+	./+	15:93472321	15:93360082	splice-site	intergenic	duplication	downstream	upstream	1	0	2	313	3	low	.	.	mismatches(1)	.	.	.	.
MCF-7 (ERR358487)	confirmed_by_structural_variant	AC005037.3	NIF3L1	+/+	+/+	2:201828353	2:201757969	splice-site	splice-site	duplication	downstream	upstream	2	0	1	217	404	low	.	.	.	.	.	.	.
MCF-7 (ERR358487)	non-validated	ASPH	CHMP1A	-/-	-/-	8:62593529	16:89713741	splice-site	splice-site	translocation	upstream	downstream	1	1	1	290	952	low	.	.	.	.	.	.	.
MCF-7 (ERR358487)	non-validated	NUP210	CDC42BPB	-/-	-/-	3:13393379	14:103421025	splice-site	splice-site	translocation	upstream	downstream	0	1	1	617	445	low	.	.	.	.	.	.	.
MCF-7 (ERR358487)	non-validated	USP3	RP11-321G12.1	+/+	+/+	15:63797029	15:63690586	splice-site	splice-site	duplication	downstream	upstream	0	2	0	738	30	low	.	.	.	.	.	.	.
MCF-7 (ERR358487)	confirmed_by_structural_variant	ERI2	LYRM1	-/-	+/+	16:20907630	16:20935322	splice-site	splice-site	inversion	upstream	upstream	1	0	1	17	300	low	.	.	.	.	.	.	.
MCF-7 (ERR358487)	non-validated	PLEC	PARP10	-/-	-/-	8:145000952	8:145060606	splice-site	splice-site	duplication	upstream	downstream	0	1	1	372	103	low	.	.	.	.	.	.	.
MCF-7 (ERR358487)	non-validated	SRPK2	PUS7	-/-	-/-	7:105029095	7:105080305	splice-site	splice-site	duplication	upstream	downstream	1	1	0	385	1	low	.	.	.	.	.	.	.
MCF-7 (ERR358487)	non-validated	CYSTM1	PURA	+/+	+/+	5:139554870	5:139493626	splice-site	splice-site	duplication	downstream	upstream	0	2	0	435	66	low	.	.	.	.	.	.	.
MCF-7 (ERR358487)	non-validated	CA12	AC007950.1	-/-	-/-	15:63667857	15:63749016	splice-site	splice-site	duplication	upstream	downstream	1	0	1	1322	7	low	.	.	.	.	.	.	.
MCF-7 (ERR358487)	validated	B3GNTL1	SLC9A8	-/-	+/+	17:80914571	20:48497461	splice-site	splice-site	translocation	upstream	upstream	0	1	0	17	43	low	.	.	.	.	.	.	.
MCF-7 (ERR358487)	non-validated	SEC22C	HMBS	-/-	+/+	3:42610357	11:118963468	splice-site	splice-site	translocation	upstream	upstream	1	0	0	311	468	low	.	.	duplicates(1)	.	.	.	.
MCF-7 (ERR358487)	non-validated	WWOX	VAT1L	+/+	+/+	16:78198186	16:78005747	splice-site	splice-site	duplication	downstream	upstream	1	0	0	130	1	low	.	.	.	.	.	.	.
MCF-7 (ERR358487)	non-validated	TSPAN4	TALDO1	+/+	+/+	11:850367	11:755879	splice-site	splice-site	duplication	downstream	upstream	0	1	0	299	1072	low	.	.	.	.	.	.	.
MCF-7 (ERR358487)	non-validated	THSD4	LRRC49	+/+	+/+	15:71389347	15:71300720	splice-site	splice-site	duplication	downstream	upstream	0	1	0	41	30	low	.	.	.	.	.	.	.
MCF-7 (ERR358488)	confirmed_by_structural_variant	FOXA1	TTC6	-/-	+/-	14:38061535	14:38184711	CDS	intron	duplication/5'-5'	upstream	downstream	337	279	300	2206	679	high	.	.	duplicates(36)	.	.	.	.
MCF-7 (ERR358488)	confirmed_by_structural_variant	ATXN7	RP5-947P14.1(131806),RP11-478L17.1(328037)	+/+	./+	3:63898901	1:106758927	splice-site	intergenic	translocation	downstream	upstream	166	295	283	573	660	high	.	.	duplicates(41),low_entropy(4),mismappers(18),mismatches(3)	.	.	.	.
MCF-7 (ERR358488)	validated	BCAS4	BCAS3	+/+	+/+	20:49411710	17:59445688	splice-site	splice-site	translocation	downstream	upstream	155	175	300	794	650	high	.	.	duplicates(39),mismappers(1)	.	.	.	.
MCF-7 (ERR358488)	duplicate	BCAS4	BCAS3	+/+	+/+	20:49411710	17:59430949	splice-site	splice-site	translocation	downstream	upstream	8	5	298	794	20	high	.	.	duplicates(17),mismappers(2),mismatches(1)	.	.	.	.
MCF-7 (ERR358488)	duplicate	BCAS4	BCAS3	+/+	+/+	20:49411710	17:59431723	splice-site	splice-site	translocation	downstream	upstream	0	2	300	794	84	high	.	.	duplicates(17)	.	.	.	.
MCF-7 (ERR358488)	duplicate	BCAS4	BCAS3	+/+	+/+	20:49411710	17:59469338	splice-site	splice-site	translocation	downstream	upstream	0	4	99	794	1486	high	.	.	duplicates(3)	.	.	.	.
MCF-7 (ERR358488)	non-validated	ZNF217	SULF2	-/-	-/+	20:52210295	20:46415149	splice-site	5'UTR	inversion/5'-5'	upstream	upstream	5	300	239	341	1258	high	.	.	duplicates(49),low_entropy(1),mismatches(1)	.	.	.	.
MCF-7 (ERR358488)	validated	PAPOLA	AK7	+/+	+/+	14:96968937	14:96904172	splice-site	splice-site	duplication	downstream	upstream	102	183	236	2201	395	high	.	.	duplicates(29),low_entropy(3),mismatches(5)	.	.	.	.
MCF-7 (ERR358488)	duplicate	PAPOLA	AK7	+/+	+/+	14:96968937	14:96909067	splice-site	splice-site	duplication	downstream	upstream	0	7	125	2201	545	high	.	.	duplicates(4),mismatches(3)	.	.	.	.
MCF-7 (ERR358488)	duplicate	PAPOLA	AK7	+/+	+/+	14:96968937	14:96917758	splice-site	splice-site	duplication	downstream	upstream	1	0	6	2201	608	high	.	.	.	.	.	.	.
MCF-7 (ERR358488)	validated	ARFGEF2	SULF2	+/+	-/-	20:47538547	20:46365686	splice-site	splice-site	inversion	downstream	downstream	120	211	139	414	598	high	.	.	duplicates(31),mismappers(2),mismatches(1)	.	.	.	.
MCF-7 (ERR358488)	non-validated	MAN2B1	HOOK2	-/-	-/-	19:12775209	19:12928493	intron	intron	duplication	upstream	downstream	109	30	85	205	167	high	.	.	duplicates(35),inconsistently_clipped(6),low_entropy(8)	.	.	.	.
MCF-7 (ERR358488)	non-validated	PROSC	RP11-150O12.1	+/+	-/+	8:37633534	8:37396582	splice-site	intron	duplication/5'-5'	downstream	upstream	77	37	93	306	163	high	.	.	duplicates(4)	.	.	.	.
MCF-7 (ERR358488)	validated	TXLNG	SYAP1	+/+	+/+	X:16804712	X:16753350	splice-site	splice-site	duplication	downstream	upstream	26	76	99	345	927	high	.	.	duplicates(11)	.	.	.	.
MCF-7 (ERR358488)	non-validated	CAMK2G	VCL	-/-	+/-	10:75606983	10:75781158	splice-site	intron	duplication/5'-5'	upstream	downstream	25	54	107	425	184	high	.	.	duplicates(7),inconsistently_clipped(2),low_entropy(5)	.	.	.	.
MCF-7 (ERR358488)	duplicate	CAMK2G	RP11-417O11.5	-/-	+/-	10:75606983	10:75781158	splice-site	intron	duplication/5'-5'	upstream	downstream	25	54	102	425	184	high	.	.	duplicates(7),inconsistently_clipped(2),low_entropy(5)	.	.	.	.
MCF-7 (ERR358488)	non-validated	USP3	APH1B	+/+	+/+	15:63797029	15:63578757	splice-site	splice-site	duplication	downstream	upstream	61	44	71	815	384	high	.	.	mismatches(1)	.	.	.	.
MCF-7 (ERR358488)	duplicate	USP3	APH1B	+/+	+/+	15:63797029	15:63594544	splice-site	splice-site	duplication	downstream	upstream	8	4	23	815	532	high	.	.	.	.	.	.	.
MCF-7 (ERR358488)	non-validated	MLLT4	KIF25	+/+	+/+	6:168227917	6:168418653	splice-site	splice-site	deletion/read-through	downstream	upstream	41	63	61	203	156	high	.	.	duplicates(1),low_entropy(2),mismappers(2)	.	.	.	.
MCF-7 (ERR358488)	validated	DEPDC1B	ELOVL7	-/-	-/-	5:59934577	5:60053472	splice-site	splice-site	duplication	upstream	downstream	46	45	68	298	175	high	.	.	duplicates(2)	.	.	.	.
MCF-7 (ERR358488)	duplicate	DEPDC1B	ELOVL7	-/-	-/-	5:59938639	5:60053472	splice-site	splice-site	duplication	upstream	downstream	0	1	18	347	175	high	.	.	.	.	.	.	.
MCF-7 (ERR358488)	validated	SMARCA4	CARM1	+/+	+/+	19:11097269	19:11015627	splice-site	splice-site	duplication	downstream	upstream	42	35	82	569	469	high	.	.	duplicates(1)	.	.	.	.
MCF-7 (ERR358488)	duplicate	SMARCA4	CARM1	+/+	+/+	19:11071850	19:11015627	splice-site	splice-site	duplication	downstream	upstream	2	2	1	597	469	medium	.	.	.	.	.	.	.
MCF-7 (ERR358488)	non-validated	PAWR	RP11-530C5.1	-/-	+/-	12:80083509	12:80118285	splice-site	intron	duplication/5'-5'	upstream	downstream	43	45	58	698	123	high	.	.	duplicates(1),inconsistently_clipped(3),mismappers(28),mismatches(1)	.	.	.	.
MCF-7 (ERR358488)	validated	ATXN7L3	FAM171A2	-/-	-/-	17:42275388	17:42433956	splice-site	splice-site	duplication	upstream	downstream	13	72	45	392	243	high	.	.	mismatches(2)	.	.	.	.
MCF-7 (ERR358488)	confirmed_by_structural_variant	NCOA3	RP11-478L17.1(36653),RP11-110F24.1(198826)	+/+	./+	20:46130763	1:107124019	splice-site	intergenic	translocation	downstream	upstream	18	78	29	1514	151	high	.	.	duplicates(3),inconsistently_clipped(3)	.	.	.	.
MCF-7 (ERR358488)	confirmed_by_structural_variant	MIDN	STK11	+/+	+/+	19:1254477	19:1191792	splice-site	intron	duplication	downstream	upstream	38	32	45	805	160	high	.	.	duplicates(4),mismappers(24),mismatches(3)	.	.	.	.
MCF-7 (ERR358488)	duplicate	MIDN	STK11	+/+	+/+	19:1254477	19:1216267	splice-site	splice-site	duplication	downstream	upstream	0	1	0	805	24	low	.	.	.	.	.	.	.
MCF-7 (ERR358488)	validated	GCN1L1	MSI1	-/-	-/-	12:120628101	12:120785317	splice-site	splice-site	duplication	upstream	downstream	31	29	40	293	129	high	.	.	duplicates(1),inconsistently_clipped(1),mismappers(1)	.	.	.	.
MCF-7 (ERR358488)	duplicate	GCN1L1	MSI1	-/-	-/-	12:120628101	12:120789203	splice-site	splice-site	duplication	upstream	downstream	4	6	43	293	55	high	.	.	mismappers(1)	.	.	.	.
MCF-7 (ERR358488)	validated	AC099850.1	VMP1	+/+	+/+	17:57184952	17:57915656	splice-site	splice-site	deletion	downstream	upstream	13	26	60	256	2791	high	.	.	duplicates(1),mismatches(1)	.	.	.	.
MCF-7 (ERR358488)	duplicate	AC099850.1	VMP1	+/+	+/+	17:57184952	17:57911373	splice-site	splice-site	deletion	downstream	upstream	3	0	60	256	38	high	.	.	mismappers(5)	.	.	.	.
MCF-7 (ERR358488)	validated	RSBN1	AP4B1-AS1	-/-	+/+	1:114354332	1:114442494	splice-site	splice-site	inversion	upstream	upstream	27	36	29	261	157	high	.	.	.	.	.	.	.
MCF-7 (ERR358488)	duplicate	RSBN1	AP4B1-AS1	-/-	+/+	1:114354332	1:114440490	splice-site	splice-site	inversion	upstream	upstream	5	4	33	261	380	high	.	.	.	.	.	.	.
MCF-7 (ERR358488)	confirmed_by_structural_variant	ZBTB25	RP11-973N13.2	-/-	-/-	14:64952683	14:65067081	3'UTR	exon	duplication	upstream	downstream	38	36	16	167	50	high	.	.	duplicates(2),low_entropy(1),mismatches(1)	.	.	.	.
MCF-7 (ERR358488)	confirmed_by_structural_variant	DYNC1H1	DYNC1H1	+/+	+/+	14:102500789	14:102466326	splice-site	splice-site	duplication/non-canonical_splicing	downstream	upstream	43	21	25	516	376	high	.	.	duplicates(1)	.	.	.	.
MCF-7 (ERR358488)	validated	GATAD2B	NUP210L	-/-	-/-	1:153895209	1:154000073	splice-site	splice-site	duplication	upstream	downstream	26	23	33	185	122	high	.	.	.	.	.	.	.
MCF-7 (ERR358488)	duplicate	GATAD2B	NUP210L	-/-	-/-	1:153895209	1:154002530	splice-site	splice-site	duplication	upstream	downstream	3	5	40	185	15	high	.	.	.	.	.	.	.
MCF-7 (ERR358488)	duplicate	GATAD2B	NUP210L	-/-	-/-	1:153895209	1:153994819	splice-site	splice-site	duplication	upstream	downstream	0	1	3	185	234	high	.	.	.	.	.	.	.
MCF-7 (ERR358488)	non-validated	CHD7	RAB2A	+/+	+/+	8:61655656	8:61531139	splice-site	splice-site	duplication	downstream	upstream	21	26	27	117	1110	high	.	.	duplicates(1),inconsistently_clipped(2)	.	.	.	.
MCF-7 (ERR358488)	confirmed_by_structural_variant	ATP9A	RNU7-92P(41182),RP11-347D21.1(5194)	-/-	./+	20:50255882	20:46574349	splice-site	intergenic	inversion	upstream	upstream	36	20	16	243	44	high	.	.	duplicates(1)	.	.	.	.
MCF-7 (ERR358488)	non-validated	CASP7	VTI1A	+/+	+/+	10:115457362	10:114427977	splice-site	splice-site	duplication	downstream	upstream	29	24	18	295	210	high	.	.	.	.	.	.	.
MCF-7 (ERR358488)	validated	TEX14	PTPRG	-/-	+/+	17:56636814	3:61608137	splice-site	intron	translocation	upstream	upstream	15	25	28	169	60	high	.	.	duplicates(1),mismappers(3)	.	.	.	.
MCF-7 (ERR358488)	duplicate	TEX14	PTPRG	-/-	+/+	17:56636814	3:61734552	splice-site	splice-site	translocation	upstream	upstream	2	3	0	169	48	high	.	.	mismappers(1)	.	.	.	.
MCF-7 (ERR358488)	validated	POP1	MATN2	+/+	+/+	8:99129618	8:99042690	splice-site	splice-site	duplication	downstream	upstream	0	58	1	63	242	high	.	.	mismappers(5)	.	.	.	.
MCF-7 (ERR358488)	duplicate	POP1	MATN2	+/+	+/+	8:99130093	8:99042690	splice-site	splice-site	duplication	downstream	upstream	1	2	1	1	242	high	.	.	duplicates(1),mismappers(1)	.	.	.	.
MCF-7 (ERR358488)	duplicate	POP1	MATN2	+/+	+/+	8:99129558	8:99042690	splice-site	splice-site	duplication	downstream	upstream	0	1	0	3	242	medium	.	.	.	.	.	.	.
MCF-7 (ERR358488)	duplicate	POP1	MATN2	+/+	+/+	8:99129558	8:99044474	splice-site	splice-site	duplication	downstream	upstream	0	1	0	3	302	medium	.	.	.	.	.	.	.
MCF-7 (ERR358488)	validated	MYO9B	FCHO1	+/+	+/+	19:17213367	19:17881234	splice-site	splice-site	deletion	downstream	upstream	14	15	27	146	48	high	.	.	.	.	.	.	.
MCF-7 (ERR358488)	duplicate	MYO9B	FCHO1	+/+	+/+	19:17213367	19:17881273	splice-site	splice-site	deletion	downstream	upstream	0	1	15	146	65	high	.	.	.	.	.	.	.
MCF-7 (ERR358488)	duplicate	MYO9B	FCHO1	+/+	+/+	19:17213367	19:17881601	splice-site	splice-site	deletion	downstream	upstream	0	1	5	146	80	high	.	.	.	.	.	.	.
MCF-7 (ERR358488)	non-validated	RAD51C	TEX14	+/+	-/+	17:56774220	17:56735314	splice-site	intron	duplication/5'-5'	downstream	upstream	18	15	23	1622	41	high	.	.	low_entropy(2)	.	.	.	.
MCF-7 (ERR358488)	non-validated	SUCO	DNM3	+/+	+/+	1:172544763	1:172222713	splice-site	splice-site	duplication	downstream	upstream	20	7	27	311	37	high	.	.	.	.	.	.	.
MCF-7 (ERR358488)	duplicate	SUCO	DNM3	+/+	+/+	1:172539870	1:172222713	splice-site	splice-site	duplication	downstream	upstream	0	3	10	436	37	high	.	.	.	.	.	.	.
MCF-7 (ERR358488)	duplicate	SUCO	DNM3	+/+	+/+	1:172539870	1:172277868	splice-site	splice-site	duplication	downstream	upstream	1	0	4	436	54	high	.	.	.	.	.	.	.
MCF-7 (ERR358488)	non-validated	GATAD2A	MAU2	+/+	+/+	19:19516828	19:19446527	splice-site	splice-site	duplication	downstream	upstream	4	7	42	287	6	high	.	.	low_entropy(1),mismatches(8)	.	.	.	.
MCF-7 (ERR358488)	duplicate	GATAD2A	MAU2	+/+	+/+	19:19496947	19:19446527	splice-site	splice-site	duplication	downstream	upstream	2	8	16	253	6	high	.	.	mismatches(19)	.	.	.	.
MCF-7 (ERR358488)	duplicate	GATAD2A	MAU2	+/+	+/+	19:19496947	19:19447979	splice-site	splice-site	duplication	downstream	upstream	1	0	7	253	271	high	.	.	.	.	.	.	.
MCF-7 (ERR358488)	confirmed_by_structural_variant	BCAS3	SNTN(39526),AC136289.1(23747)	+/+	./+	17:58824640	3:63704222	splice-site	intergenic	translocation	downstream	upstream	9	11	29	321	41	high	.	.	mismappers(7)	.	.	.	.
MCF-7 (ERR358488)	validated	ADAMTS19	SLC27A6	+/+	+/+	5:128797450	5:128364038	splice-site	splice-site	duplication	downstream	upstream	3	12	30	57	85	high	.	.	.	.	.	.	.
MCF-7 (ERR358488)	duplicate	ADAMTS19	SLC27A6	+/+	+/+	5:128796175	5:128364038	splice-site	splice-site	duplication	downstream	upstream	1	5	16	85	85	high	.	.	.	.	.	.	.
MCF-7 (ERR358488)	duplicate	ADAMTS19	SLC27A6	+/+	+/+	5:128797450	5:128368799	splice-site	splice-site	duplication	downstream	upstream	0	1	3	57	156	high	.	.	.	.	.	.	.
MCF-7 (ERR358488)	non-validated	PGGT1B	CCDC112(68468),CTNNAP1(24344)	-/-	./-	5:114557521	5:114700996	splice-site	intergenic	duplication	upstream	downstream	9	17	17	392	35	high	.	.	inconsistently_clipped(1)	.	.	.	.
MCF-7 (ERR358488)	non-validated	CHD2	FAM174B	+/+	-/+	15:93472321	15:93330541	splice-site	intron	duplication/5'-5'	downstream	upstream	16	13	13	304	63	high	.	.	low_entropy(1),mismappers(8)	.	.	.	.
MCF-7 (ERR358488)	non-validated	PREX1	RP1-148H17.1(44376),RPL35AP(21511)	-/-	./-	20:47292731	20:46085447	splice-site	intergenic	deletion	upstream	downstream	21	9	11	1569	23	high	.	.	duplicates(2),low_entropy(5),mismappers(1)	.	.	.	.
MCF-7 (ERR358488)	confirmed_by_structural_variant	TOP1	RNA5SP484(163361),RNU2-52P(6615)	+/+	./+	20:39706277	20:39646230	splice-site	intergenic	duplication	downstream	upstream	12	8	20	1604	18	high	.	.	mismappers(1)	.	.	.	.
MCF-7 (ERR358488)	confirmed_by_structural_variant	TRAPPC4	DSCAML1	+/+	-/+	11:118892596	11:117386244	splice-site	intron	duplication/5'-5'	downstream	upstream	32	0	4	718	5	high	.	.	duplicates(3)	.	.	.	.
MCF-7 (ERR358488)	confirmed_by_structural_variant	PDE8A	SCAND2P	+/+	+/+	15:85525579	15:85180578	splice-site	splice-site	duplication	downstream	upstream	6	6	21	98	49	high	.	.	.	.	.	.	.
MCF-7 (ERR358488)	validated	BCAS4	ZMYND8	+/+	-/-	20:49411710	20:45850125	splice-site	splice-site	inversion	downstream	downstream	3	8	22	794	1926	high	.	.	low_entropy(1)	.	.	.	.
MCF-7 (ERR358488)	duplicate	BCAS4	ZMYND8	+/+	-/-	20:49411710	20:45839542	splice-site	splice-site	inversion	downstream	downstream	0	1	9	794	2359	high	.	.	.	.	.	.	.
MCF-7 (ERR358488)	confirmed_by_structural_variant	TTC6	RP11-356O9.1	+/+	+/+	14:38065213	14:38033424	splice-site	exon	duplication	downstream	upstream	4	13	15	117	44	high	.	.	duplicates(1),mismappers(1)	.	.	.	.
MCF-7 (ERR358488)	non-validated	FARS2	RP1-21P18.1(23618),RP4-529N6.2(45661)	+/+	./+	6:5261893	6:4553860	splice-site	intergenic	duplication	downstream	upstream	8	12	10	173	22	high	.	.	.	.	.	.	.
MCF-7 (ERR358488)	confirmed_by_structural_variant	DHX30	EMCN	+/+	-/+	3:47859607	4:101342411	splice-site	intron	translocation/5'-5'	downstream	upstream	6	5	18	153	31	high	.	.	mismappers(1)	.	.	.	.
MCF-7 (ERR358488)	non-validated	BAIAP2L1	AC074121.4(9638),NPTX2(128434)	-/-	./-	7:97949370	7:98118175	splice-site	intergenic	duplication	upstream	downstream	0	18	10	586	53	high	.	.	duplicates(2),mismappers(32)	.	.	.	.
MCF-7 (ERR358488)	confirmed_by_structural_variant	NCOA3	RP5-947P14.1(451286),RP11-478L17.1(8557)	+/+	./+	20:46130763	1:107078407	splice-site	intergenic	translocation	downstream	upstream	6	18	2	1514	56	high	.	.	mismappers(6)	.	.	.	.
MCF-7 (ERR358488)	non-validated	ZNF217	NCOA3	-/-	+/-	20:52214170	20:46265315	splice-site	CDS	deletion/5'-5'	upstream	downstream	14	5	7	27	1963	high	.	.	.	.	.	.	.
MCF-7 (ERR358488)	validated	PLCG1	TOP1	+/+	+/+	20:39766498	20:39729878	splice-site	CDS	duplication	downstream	upstream	10	4	12	541	1143	high	.	.	.	.	.	.	.
MCF-7 (ERR358488)	duplicate	PLCG1	TOP1	+/+	+/+	20:39766498	20:39729849	splice-site	splice-site	duplication	downstream	upstream	6	1	12	541	1255	high	.	.	.	.	.	.	.
MCF-7 (ERR358488)	duplicate	PLCG1	TOP1	+/+	+/+	20:39766498	20:39729851	splice-site	splice-site	duplication	downstream	upstream	1	0	12	541	1255	high	.	.	.	.	.	.	.
MCF-7 (ERR358488)	duplicate	PLCG1	TOP1	+/+	+/+	20:39765675	20:39729849	splice-site	splice-site	duplication	downstream	upstream	0	7	1	109	1255	medium	.	.	duplicates(1)	.	.	.	.
MCF-7 (ERR358488)	duplicate	PLCG1	TOP1	+/+	+/+	20:39766498	20:39741422	splice-site	splice-site	duplication	downstream	upstream	1	0	5	541	1476	medium	.	.	.	.	.	.	.
MCF-7 (ERR358488)	duplicate	PLCG1	TOP1	+/+	+/+	20:39765675	20:39741422	splice-site	splice-site	duplication	downstream	upstream	0	1	1	109	1476	medium	.	.	.	.	.	.	.
MCF-7 (ERR358488)	non-validated	PIN1	ILF3	+/+	+/+	19:9958816	19:10781192	splice-site	splice-site	deletion	downstream	upstream	8	10	7	375	1560	high	.	.	.	.	.	.	.
MCF-7 (ERR358488)	duplicate	PIN1	ILF3	+/+	+/+	19:9949324	19:10781192	splice-site	splice-site	deletion	downstream	upstream	2	0	1	410	1560	high	.	.	.	.	.	.	.
MCF-7 (ERR358488)	non-validated	SULF2(273),RNU7-173P(40080)	SULF2	./+	-/-	20:46415633	20:46386207	intergenic	splice-site	inversion	downstream	downstream	8	6	11	691	140	high	.	.	.	.	.	.	.
MCF-7 (ERR358488)	confirmed_by_structural_variant	DENND2C	RNU7-14P(71646),AC006076.1(59419)	-/-	./+	1:115161007	20:52356943	splice-site	intergenic	translocation	upstream	upstream	2	19	3	19	91	high	.	.	.	.	.	.	.
MCF-7 (ERR358488)	non-validated	THSD4	SNRK	+/+	+/-	15:71704162	3:43396055	splice-site	intron	translocation/5'-5'	downstream	downstream	10	3	10	197	10	high	.	.	duplicates(2)	.	.	.	.
MCF-7 (ERR358488)	non-validated	ATP1A1	RP11-323A7.1(166064),RP11-470F18.1(10613)	+/+	./+	1:116939356	9:78183972	splice-site	intergenic	translocation	downstream	upstream	9	6	8	3025	13	high	.	.	mismappers(1)	.	.	.	.
MCF-7 (ERR358488)	non-validated	THSD4	AC104434.1(11382),SNRK(64259)	+/+	./-	15:71704162	3:43263745	splice-site	intergenic	translocation	downstream	downstream	8	7	7	197	25	high	.	.	duplicates(1)	.	.	.	.
MCF-7 (ERR358488)	validated	ZMYND8	USP32	-/-	-/-	20:45910846	17:58422969	splice-site	splice-site	translocation	upstream	downstream	7	5	10	1564	710	high	.	.	.	.	.	.	.
MCF-7 (ERR358488)	confirmed_by_structural_variant	PKP2	PKP2(82955),RP11-267D19.2(6043)	-/-	./+	12:33049443	12:33132729	splice-site	intergenic	inversion	upstream	upstream	11	3	7	71	20	high	.	.	duplicates(1)	.	.	.	.
MCF-7 (ERR358488)	validated	VAV3	AP4B1-AS1	-/-	+/+	1:108138834	1:114442494	splice-site	splice-site	inversion	upstream	upstream	8	6	6	1032	157	high	.	.	.	.	.	.	.
MCF-7 (ERR358488)	duplicate	VAV3	AP4B1-AS1	-/-	+/+	1:108138834	1:114440490	splice-site	splice-site	inversion	upstream	upstream	0	2	6	1032	380	high	.	.	.	.	.	.	.
MCF-7 (ERR358488)	confirmed_by_structural_variant	GRHL2	KB-1562D12.1	+/+	-/+	8:102505017	8:102487410	splice-site	intron	duplication/5'-5'	downstream	upstream	6	6	8	547	60	high	.	.	mismappers(1)	.	.	.	.
MCF-7 (ERR358488)	duplicate	KB-1562D12.1	GRHL2	-/+	+/+	8:102487630	8:102555469	intron	splice-site	deletion/read-through/3'-3'	downstream	upstream	7	8	12	64	754	medium	.	.	duplicates(1),mismappers(1)	.	.	.	.
MCF-7 (ERR358488)	confirmed_by_structural_variant	SMARCC1	EMCN	-/-	-/-	3:47779519	4:101491482	splice-site	splice-site	translocation	upstream	downstream	0	6	13	455	50	high	.	.	duplicates(1),mismappers(47)	.	.	.	.
MCF-7 (ERR358488)	duplicate	SMARCC1	EMCN	-/-	-/-	3:47779519	4:101505123	splice-site	splice-site	translocation	upstream	downstream	2	1	16	455	7	high	.	.	mismappers(25)	.	.	.	.
MCF-7 (ERR358488)	validated	BCAS3	ATXN7	+/+	+/+	17:58824640	3:63981181	splice-site	splice-site	translocation	downstream	upstream	1	7	10	321	203	high	.	.	.	.	.	.	.
MCF-7 (ERR358488)	confirmed_by_structural_variant	FBRSL1	MUC8(1351),FBRSL1(14060)	+/+	./+	12:133104574	12:133052077	splice-site	intergenic	duplication	downstream	upstream	4	3	11	94	12	high	.	.	.	.	.	.	.
MCF-7 (ERR358488)	validated	VAV3	RP5-1073O3.2	-/-	+/+	1:108138834	1:114357009	splice-site	splice-site	inversion	upstream	upstream	7	5	5	1032	33	high	.	.	duplicates(1)	.	.	.	.
MCF-7 (ERR358488)	non-validated	TRIM33	TRIM33	-/-	-/+	1:115053172	1:115042966	splice-site	intron	inversion/5'-5'	upstream	upstream	5	6	6	489	21	high	.	.	low_entropy(1)	.	.	.	.
MCF-7 (ERR358488)	validated	TBL1XR1	RGS17	-/-	-/-	3:176914909	6:153365178	splice-site	splice-site	translocation	upstream	downstream	4	7	5	183	19	high	.	.	mismappers(1)	.	.	.	.
MCF-7 (ERR358488)	duplicate	TBL1XR1	RGS17	-/-	-/-	3:176849151	6:153365178	splice-site	splice-site	translocation	upstream	downstream	0	1	5	13	19	high	.	.	.	.	.	.	.
MCF-7 (ERR358488)	duplicate	TBL1XR1	RGS17	-/-	-/-	3:176878659	6:153365178	splice-site	splice-site	translocation	upstream	downstream	0	1	5	13	19	high	.	.	.	.	.	.	.
MCF-7 (ERR358488)	non-validated	NF2	HSCB	+/+	+/+	22:30079053	22:29147229	splice-site	splice-site	duplication	downstream	upstream	8	4	3	104	258	high	.	.	mismappers(4)	.	.	.	.
MCF-7 (ERR358488)	non-validated	PARD6B	CADPS(23740),RP11-24H1.1(27252)	+/+	./-	20:49348389	3:62884794	splice-site	intergenic	translocation	downstream	downstream	5	3	7	868	30	high	.	.	duplicates(1),low_entropy(2),mismappers(10)	.	.	.	.
MCF-7 (ERR358488)	confirmed_by_structural_variant	TRIM37	PFDN4(216530),DOK5(31015)	-/-	./-	17:57165652	20:53061121	splice-site	intergenic	translocation	upstream	downstream	6	1	8	2995	11	high	.	.	duplicates(1),mismappers(7)	.	.	.	.
MCF-7 (ERR358488)	validated	RAD51C	ATXN7	+/+	+/+	17:56801461	3:63965591	splice-site	splice-site	translocation	downstream	upstream	3	6	5	1642	171	high	.	.	.	.	.	.	.
MCF-7 (ERR358488)	duplicate	RAD51C	ATXN7	+/+	+/+	17:56798173	3:63965591	splice-site	splice-site	translocation	downstream	upstream	5	1	4	1859	171	high	.	.	.	.	.	.	.
MCF-7 (ERR358488)	validated	PNPLA7	DPH7	-/-	-/-	9:140409831	9:140450100	splice-site	splice-site	duplication	upstream	downstream	8	3	3	36	293	high	.	.	.	.	.	.	.
MCF-7 (ERR358488)	non-validated	TRIM4	GJC3	-/-	-/-	7:99516632	7:99527244	splice-site	splice-site	duplication	upstream	downstream	1	1	11	344	10	high	.	.	duplicates(1)	.	.	.	.
MCF-7 (ERR358488)	duplicate	TRIM4	GJC3	-/-	-/-	7:99514325	7:99527244	splice-site	splice-site	duplication	upstream	downstream	1	0	11	9	10	high	.	.	duplicates(1)	.	.	.	.
MCF-7 (ERR358488)	duplicate	TRIM4	GJC3	-/-	-/-	7:99516632	7:99521226	splice-site	splice-site	duplication	upstream	downstream	1	2	6	344	28	high	.	.	duplicates(1)	.	.	.	.
MCF-7 (ERR358488)	validated	SULF2	PRICKLE2	-/-	-/-	20:46414087	3:64085601	splice-site	splice-site	translocation	upstream	downstream	4	6	2	101	29	high	.	.	.	.	.	.	.
MCF-7 (ERR358488)	duplicate	SULF2	PRICKLE2	-/-	-/-	20:46414579	3:64085601	splice-site	splice-site	translocation	upstream	downstream	0	1	1	23	29	medium	.	.	.	.	.	.	.
MCF-7 (ERR358488)	non-validated	WDHD1	LRRC42	-/-	+/-	14:55411050	1:54420493	splice-site	intron	translocation/5'-5'	upstream	downstream	4	3	4	274	20	high	.	.	.	.	.	.	.
MCF-7 (ERR358488)	non-validated	MYO9A	PARP6	-/-	-/-	15:72320072	15:72560012	splice-site	splice-site	duplication	upstream	downstream	5	3	3	60	284	high	.	.	.	.	.	.	.
MCF-7 (ERR358488)	confirmed_by_structural_variant	VAV3	RSBN1	-/-	-/+	1:108138834	1:114354072	splice-site	intron	inversion/5'-5'	upstream	upstream	1	2	7	1032	17	high	.	.	duplicates(1),mismappers(6)	.	.	.	.
MCF-7 (ERR358488)	non-validated	PPM1D	FLG	+/+	-/-	17:58678247	1:152287953	splice-site	splice-site	translocation	downstream	downstream	0	4	6	607	23	high	.	.	inconsistently_clipped(2)	.	.	.	.
MCF-7 (ERR358488)	confirmed_by_structural_variant	ATP1A1	RN7SL603P(107503),ZFP64(3327)	+/+	./-	1:116939356	20:50664875	splice-site	intergenic	translocation	downstream	downstream	4	4	2	3025	5	high	.	.	.	.	.	.	.
MCF-7 (ERR358488)	non-validated	PGGT1B	CCDC112	-/-	-/-	5:114557521	5:114620605	splice-site	splice-site	duplication	upstream	downstream	2	3	5	392	194	high	.	.	inconsistently_clipped(1)	.	.	.	.
MCF-7 (ERR358488)	non-validated	CD180(18305),CTD-2187J20.1(52918)	RP11-434D9.1	./+	+/+	5:66510932	5:66915619	intergenic	splice-site	deletion	downstream	upstream	2	4	3	9	17	high	.	.	.	.	.	.	.
MCF-7 (ERR358488)	non-validated	CTD-2591A6.2	AP4S1	+/+	+/+	14:28787451	14:31535332	exon	splice-site	deletion	downstream	upstream	1	6	2	13	145	high	.	.	.	.	.	.	.
MCF-7 (ERR358488)	non-validated	RSRC1	OTOL1(132535),RP11-774I5.1(180432)	+/+	./+	3:158015864	3:161354265	splice-site	intergenic	deletion	downstream	upstream	5	1	3	320	4	high	.	.	.	.	.	.	.
MCF-7 (ERR358488)	non-validated	VCL	RP11-574K11.8	+/+	+/+	10:75758133	10:75606093	splice-site	splice-site	duplication	downstream	upstream	2	1	6	132	13	high	.	.	.	.	.	.	.
MCF-7 (ERR358488)	non-validated	JUP	CRTC1	-/-	+/-	17:39927899	19:18811801	splice-site	intron	translocation/5'-5'	upstream	downstream	2	4	3	1640	10	high	.	.	duplicates(1)	.	.	.	.
MCF-7 (ERR358488)	duplicate	CRTC1	JUP	+/+	-/-	19:18794638	17:39925735	splice-site	CDS	translocation	downstream	downstream	1	0	0	72	1946	low	.	.	.	.	.	.	.
MCF-7 (ERR358488)	confirmed_by_structural_variant	DSCR8	DSCR4	+/+	-/+	21:39529179	21:39490911	splice-site	intron	duplication/5'-5'	downstream	upstream	2	2	5	20	15	high	.	.	.	.	.	.	.
MCF-7 (ERR358488)	non-validated	SMYD3	NLRP3	-/-	+/-	1:246670356	1:247602835	splice-site	intron	duplication/5'-5'	upstream	downstream	3	3	2	95	9	high	.	.	mismappers(2)	.	.	.	.
MCF-7 (ERR358488)	validated	ATP1A1	ZFP64	+/+	-/-	1:116939356	20:50668671	splice-site	splice-site	translocation	downstream	downstream	3	2	3	3025	26	high	.	.	mismappers(14)	.	.	.	.
MCF-7 (ERR358488)	duplicate	ATP1A1	ZFP64	+/+	-/-	1:116939622	20:50680236	intron	intron	translocation	downstream	downstream	1	1	6	4	2	medium	.	.	mismappers(15)	.	.	.	.
MCF-7 (ERR358488)	confirmed_by_structural_variant	COQ2	FAM175A	-/-	-/-	4:84182871	4:84397832	3'UTR	splice-site	duplication	upstream	downstream	1	4	3	13	155	high	.	.	.	.	.	.	.
MCF-7 (ERR358488)	duplicate	COQ2	FAM175A	-/-	-/-	4:84183742	4:84397832	splice-site	splice-site	duplication	upstream	downstream	0	1	0	19	155	low	.	.	.	.	.	.	.
MCF-7 (ERR358488)	non-validated	MAN2B1	RNASEH2A	-/-	+/-	19:12775606	19:12923991	splice-site	CDS	duplication/5'-5'	upstream	downstream	6	0	2	367	1718	high	.	.	mismappers(3)	.	.	.	.
MCF-7 (ERR358488)	non-validated	PRPF8	SMYD4	-/-	-/-	17:1558644	17:1715409	splice-site	splice-site	duplication	upstream	downstream	2	3	3	1306	66	high	.	.	.	.	.	.	.
MCF-7 (ERR358488)	non-validated	HAGH	MEIOB	-/-	-/-	16:1866894	16:1912117	splice-site	splice-site	duplication	upstream	downstream	2	4	2	596	10	high	.	.	low_entropy(1)	.	.	.	.
MCF-7 (ERR358488)	duplicate	HAGH	MEIOB	-/-	-/-	16:1866894	16:1904201	splice-site	splice-site	duplication	upstream	downstream	0	2	0	596	23	medium	.	.	.	.	.	.	.
MCF-7 (ERR358488)	duplicate	HAGH	MEIOB	-/-	-/-	16:1866894	16:1910476	splice-site	splice-site	duplication	upstream	downstream	0	0	0	596	12	medium	.	.	low_entropy(1)	.	.	.	.
MCF-7 (ERR358488)	non-validated	PLEC	PARP10	-/-	-/-	8:144996672	8:145086937	splice-site	5'UTR	duplication	upstream	downstream	1	3	4	207	26	high	.	.	.	.	.	.	.
MCF-7 (ERR358488)	duplicate	PLEC	PARP10	-/-	-/-	8:144996672	8:145060606	splice-site	splice-site	duplication	upstream	downstream	1	1	0	207	154	medium	.	.	.	.	.	.	.
MCF-7 (ERR358488)	duplicate	PLEC	PARP10	-/-	-/-	8:145000952	8:145060606	splice-site	splice-site	duplication	upstream	downstream	1	0	0	404	154	medium	.	.	.	.	.	.	.
MCF-7 (ERR358488)	duplicate	PLEC	PARP10	-/-	-/-	8:145000952	8:145060143	splice-site	splice-site	duplication	upstream	downstream	0	1	0	404	305	medium	.	.	.	.	.	.	.
MCF-7 (ERR358488)	duplicate	MYO9A	CELF6	-/-	-/-	15:72320072	15:72560012	splice-site	splice-site	duplication	upstream	downstream	5	1	1	60	284	high	.	.	.	.	.	.	.
MCF-7 (ERR358488)	confirmed_by_structural_variant	ARRB1	KLHL35	-/-	-/-	11:75020580	11:75136626	intron	splice-site	duplication	upstream	downstream	0	1	6	3	40	high	.	.	.	.	.	.	.
MCF-7 (ERR358488)	duplicate	ARRB1	KLHL35	-/-	-/-	11:75062632	11:75133812	splice-site	splice-site	duplication	upstream	downstream	0	1	0	56	42	low	.	.	.	.	.	.	.
MCF-7 (ERR358488)	non-validated	ATP1A1	RP11-470F18.1	+/+	+/+	1:116939356	9:78203277	splice-site	exon	translocation	downstream	upstream	2	2	3	3025	6	high	.	.	.	.	.	.	.
MCF-7 (ERR358488)	non-validated	HOOK3	RP13-359K18.1(187175),RNU6-472P(17982)	+/+	./-	8:42761401	12:34058327	splice-site	intergenic	translocation	downstream	downstream	2	3	1	28	5	high	.	.	duplicates(1),mismappers(1)	.	.	.	.
MCF-7 (ERR358488)	non-validated	TCF12	TEX9	+/+	+/+	15:57213296	15:56657777	splice-site	splice-site	duplication	downstream	upstream	1	2	3	157	87	high	.	.	.	.	.	.	.
MCF-7 (ERR358488)	duplicate	TCF12	TEX9	+/+	+/+	15:57213296	15:56686363	splice-site	splice-site	duplication	downstream	upstream	1	0	0	157	74	medium	.	.	.	.	.	.	.
MCF-7 (ERR358488)	non-validated	RNU6-870P(96553),FAM183A(24963)	AP4S1	./+	+/+	1:43585861	14:31535332	intergenic	splice-site	translocation	downstream	upstream	1	1	4	27	145	high	.	.	.	.	.	.	.
MCF-7 (ERR358488)	non-validated	RP11-32B5.7	RP11-32B5.7(4990),RP11-32B5.4(14317)	-/-	./-	15:21967898	15:21973141	splice-site	intergenic	duplication	upstream	downstream	5	1	0	12	1	high	.	.	low_entropy(1)	.	.	.	.
MCF-7 (ERR358488)	non-validated	CXorf23	MAP7D2	-/-	-/-	X:19955536	X:20082923	splice-site	splice-site	duplication	upstream	downstream	1	0	5	31	11	high	.	.	.	.	.	.	.
MCF-7 (ERR358488)	duplicate	CXorf23	MAP7D2	-/-	-/-	X:19955623	X:20082923	splice-site	splice-site	duplication	upstream	downstream	0	2	4	74	11	high	.	.	.	.	.	.	.
MCF-7 (ERR358488)	duplicate	CXorf23	MAP7D2	-/-	-/-	X:19968871	X:20082923	splice-site	splice-site	duplication	upstream	downstream	0	2	3	81	11	high	.	.	.	.	.	.	.
MCF-7 (ERR358488)	non-validated	TRRAP	DYNC1I1	+/+	+/+	7:98576527	7:95434033	splice-site	splice-site	duplication	downstream	upstream	1	4	1	295	9	high	.	.	.	.	.	.	.
MCF-7 (ERR358488)	non-validated	ATP1A1	RP11-323A7.1(146715),RP11-470F18.1(29962)	+/+	./+	1:116939356	9:78164623	splice-site	intergenic	translocation	downstream	upstream	0	3	3	3025	6	high	.	.	.	.	.	.	.
MCF-7 (ERR358488)	validated	ANKS1A	UHRF1BP1	+/+	+/+	6:34857376	6:34801994	splice-site	splice-site	duplication	downstream	upstream	1	5	0	62	107	high	.	.	.	.	.	.	.
MCF-7 (ERR358488)	confirmed_by_structural_variant	ATP9A	RP11-347D21.3(21864),SNORD36(125334)	-/-	./+	20:50255882	20:46639352	splice-site	intergenic	inversion	upstream	upstream	1	1	3	243	4	high	.	.	.	.	.	.	.
MCF-7 (ERR358488)	non-validated	AC131097.3	SERINC2	+/+	+/+	2:242830000	1:31905814	intron	splice-site	translocation	downstream	upstream	0	1	4	43	150	high	.	.	.	.	.	.	.
MCF-7 (ERR358488)	non-validated	THSD4	AC104434.1(51712),SNRK(23929)	+/+	./-	15:71704162	3:43304075	splice-site	intergenic	translocation	downstream	downstream	3	1	1	197	3	high	.	.	.	.	.	.	.
MCF-7 (ERR358488)	non-validated	ATP1A1	RP11-323A7.1(133404),RP11-470F18.1(43273)	+/+	./+	1:116939356	9:78151312	splice-site	intergenic	translocation	downstream	upstream	0	4	1	3025	5	high	.	.	.	.	.	.	.
MCF-7 (ERR358488)	confirmed_by_structural_variant	TAOK1	NUFIP2	+/+	-/+	17:27778698	17:27606385	splice-site	intron	duplication/5'-5'	downstream	upstream	1	2	2	139	36	high	.	.	.	.	.	.	.
MCF-7 (ERR358488)	non-validated	SQLE	LINC00964	+/+	+/+	8:126030969	8:125963058	splice-site	splice-site	duplication	downstream	upstream	2	1	2	617	3	high	.	.	.	.	.	.	.
MCF-7 (ERR358488)	non-validated	BCAS1	RP11-347D21.3(118443),SNORD36(28755)	-/-	./-	20:52686972	20:46735931	splice-site	intergenic	deletion	upstream	downstream	1	2	1	140	4	high	.	.	.	.	.	.	.
MCF-7 (ERR358488)	non-validated	C9orf156	RNU6-918P(3478),NANS(20926)	-/-	./-	9:100672242	9:100798095	splice-site	intergenic	duplication	upstream	downstream	0	3	1	230	3	high	.	.	.	.	.	.	.
MCF-7 (ERR358488)	validated	PTPRG	CCDC129	+/+	+/+	3:61989171	7:31681790	splice-site	splice-site	translocation	downstream	upstream	1	0	3	43	1	high	.	.	.	.	.	.	.
MCF-7 (ERR358488)	confirmed_by_structural_variant	ATP9A	RP11-347D21.1	-/-	+/+	20:50255882	20:46580501	splice-site	splice-site	inversion	upstream	upstream	1	1	2	243	23	high	.	.	.	.	.	.	.
MCF-7 (ERR358488)	non-validated	RP5-947P14.1(173599),RP11-478L17.1(286244)	BCAS1	./+	-/-	1:106800720	20:52612589	intergenic	splice-site	translocation	downstream	downstream	2	0	2	197	175	high	.	.	mismappers(2)	.	.	.	.
MCF-7 (ERR358488)	non-validated	PCMTD2	PLCXD1	+/+	+/+	20:62887223	X:200834	splice-site	splice-site	translocation	downstream	upstream	1	1	2	206	89	high	.	.	.	.	.	.	.
MCF-7 (ERR358488)	non-validated	GNG7	FBXO16	-/-	-/-	19:2555147	8:28286253	splice-site	splice-site	translocation	upstream	downstream	1	1	2	24	23	high	.	.	.	.	.	.	.
MCF-7 (ERR358488)	duplicate	GNG7	FBXO16	-/-	-/-	19:2555147	8:28218699	splice-site	splice-site	translocation	upstream	downstream	1	0	0	24	58	medium	.	.	.	.	.	.	.
MCF-7 (ERR358488)	confirmed_by_structural_variant	UNK	ABCA5(1526),SNORA40(26363)	+/+	./-	17:73816189	17:67324911	splice-site	intergenic	inversion	downstream	downstream	3	1	0	233	8	high	.	.	.	.	.	.	.
MCF-7 (ERR358488)	non-validated	BMP7	SULF2	-/-	-/+	20:55840761	20:46415149	splice-site	5'UTR	inversion/5'-5'	upstream	upstream	1	2	1	263	1258	high	.	.	.	.	.	.	.
MCF-7 (ERR358488)	non-validated	MTPN	AC009784.3	-/-	+/-	7:135661777	7:135955593	splice-site	intron	duplication/5'-5'	upstream	downstream	0	1	3	1014	2	high	.	.	.	.	.	.	.
MCF-7 (ERR358488)	validated	AHCYL1	RAD51C	+/+	+/+	1:110527794	17:56811479	splice-site	splice-site	translocation	downstream	upstream	0	3	1	871	1598	high	.	.	.	.	.	.	.
MCF-7 (ERR358488)	duplicate	AHCYL1	RAD51C	+/.	+/.	1:110547808	17:56810937	intron	intron	translocation	downstream	upstream	0	1	2	8	34	medium	.	.	mismappers(2)	.	.	.	.
MCF-7 (ERR358488)	validated	NAV1	GPR37L1	+/+	+/+	1:201687883	1:202096869	splice-site	splice-site	deletion	downstream	upstream	0	2	1	29	18	high	.	.	.	.	.	.	.
MCF-7 (ERR358488)	duplicate	NAV1	GPR37L1	+/+	+/+	1:201709204	1:202096869	splice-site	splice-site	deletion/read-through	downstream	upstream	4	1	2	40	18	medium	.	.	.	.	.	.	.
MCF-7 (ERR358488)	confirmed_by_structural_variant	FAM65C	EYA2	-/-	+/+	20:49286980	20:45797787	intron	splice-site	inversion	upstream	upstream	1	2	0	2	5	high	.	.	.	.	.	.	.
MCF-7 (ERR358488)	non-validated	AC139099.4(2739),AC139099.6(31650)	MYT1	./-	+/+	17:81128115	20:62830215	intergenic	splice-site	translocation	upstream	upstream	2	0	1	3	18	high	.	.	.	.	.	.	.
MCF-7 (ERR358488)	non-validated	UBE2E2	RP11-20B7.1	+/+	+/+	3:23258803	3:73918927	splice-site	splice-site	deletion	downstream	upstream	1	1	1	199	2	high	.	.	.	.	.	.	.
MCF-7 (ERR358488)	non-validated	CRTC1	JUP(607),LEPREL4(14409)	+/+	./+	19:18794638	17:39943790	splice-site	intergenic	translocation	downstream	upstream	0	2	1	72	21	high	.	.	.	.	.	.	.
MCF-7 (ERR358488)	confirmed_by_structural_variant	TBL1XR1	RGS17(25356),RNA5SP224(2615)	-/-	./-	3:176849151	6:153477740	splice-site	intergenic	translocation	upstream	downstream	2	1	0	13	10	high	.	.	.	.	.	.	.
MCF-7 (ERR358488)	confirmed_by_structural_variant	AMPD1	RSBN1	-/-	-/+	1:115226820	1:114306402	splice-site	3'UTR	inversion/5'-5'	upstream	upstream	0	2	1	0	178	high	.	.	.	.	.	.	.
MCF-7 (ERR358488)	non-validated	RP11-403B2.7	RP11-403B2.6	-/-	-/-	15:20961259	15:20966487	splice-site	intron	duplication	upstream	downstream	2	0	1	4	1	high	.	.	.	.	.	.	.
MCF-7 (ERR358488)	duplicate	RP11-403B2.7	RP11-403B2.6	-/-	-/-	15:20961259	15:20965236	splice-site	splice-site	duplication	upstream	downstream	0	1	0	4	5	low	.	.	mismatches(1)	.	.	.	.
MCF-7 (ERR358488)	non-validated	THSD4	SNRK-AS1	+/+	-/-	15:71704162	3:43392873	splice-site	splice-site	translocation	downstream	downstream	2	1	0	197	19	high	.	.	duplicates(1)	.	.	.	.
MCF-7 (ERR358488)	non-validated	SND1	RP11-3B12.2	+/+	+/+	7:127544872	7:124969736	splice-site	splice-site	duplication	downstream	upstream	1	0	2	1074	1	high	.	.	.	.	.	.	.
MCF-7 (ERR358488)	duplicate	SND1	RP11-3B12.2	+/+	+/+	7:127544872	7:124987179	splice-site	splice-site	duplication	downstream	upstream	0	1	1	1074	5	medium	.	.	.	.	.	.	.
MCF-7 (ERR358488)	non-validated	RSRC1	OTOL1(175755),RP11-774I5.1(137212)	+/+	./+	3:158015864	3:161397485	splice-site	intergenic	deletion	downstream	upstream	1	0	1	320	1	high	.	.	mismappers(1)	.	.	.	.
MCF-7 (ERR358488)	non-validated	KANK1	snoU13(102169),RP11-255N24.4(278134)	+/+	./-	9:677009	9:30280744	splice-site	intergenic	inversion	downstream	downstream	1	0	1	27	1	high	.	.	.	.	.	.	.
MCF-7 (ERR358488)	non-validated	CHD2	FAM174B(9108),RN7SL599P(37511)	+/+	./+	15:93472321	15:93362222	splice-site	intergenic	duplication	downstream	upstream	0	1	1	304	3	high	.	.	mismappers(2)	.	.	.	.
MCF-7 (ERR358488)	non-validated	KISS1R	RORA	+/+	-/+	19:917746	15:61036052	splice-site	intron	translocation/5'-5'	downstream	upstream	1	1	0	44	0	high	.	.	.	.	.	.	.
MCF-7 (ERR358488)	non-validated	PARD3B	AC106901.1(60852),AC016903.1(29432)	+/+	./+	2:205551005	2:205305367	splice-site	intergenic	duplication	downstream	upstream	0	1	1	4	2	high	.	.	.	.	.	.	.
MCF-7 (ERR358488)	validated	MTAP	CDKN2B-AS1	+/+	+/+	9:21818201	9:22029432	splice-site	splice-site	deletion/read-through	downstream	upstream	4	1	44	123	11	medium	.	.	.	.	.	.	.
MCF-7 (ERR358488)	duplicate	MTAP	CDKN2B-AS1	+/+	+/+	9:21818201	9:21995047	splice-site	splice-site	deletion/read-through	downstream	upstream	1	0	45	123	11	medium	.	.	.	.	.	.	.
MCF-7 (ERR358488)	duplicate	MTAP	CDKN2B-AS1	+/+	+/+	9:21818201	9:22092307	splice-site	splice-site	deletion/read-through	downstream	upstream	8	3	31	123	20	medium	.	.	.	.	.	.	.
MCF-7 (ERR358488)	duplicate	MTAP	CDKN2B-AS1	+/+	+/+	9:21818201	9:22096371	splice-site	splice-site	deletion/read-through	downstream	upstream	5	3	25	123	34	medium	.	.	mismatches(1)	.	.	.	.
MCF-7 (ERR358488)	duplicate	MTAP	CDKN2B-AS1	+/+	+/+	9:21818201	9:22097257	splice-site	splice-site	deletion/read-through	downstream	upstream	3	2	19	123	46	medium	.	.	duplicates(1)	.	.	.	.
MCF-7 (ERR358488)	duplicate	MTAP	CDKN2B-AS1	+/+	+/+	9:21818201	9:22112319	splice-site	splice-site	deletion/read-through	downstream	upstream	3	3	12	123	81	medium	.	.	.	.	.	.	.
MCF-7 (ERR358488)	duplicate	MTAP	CDKN2B-AS1	+/+	+/+	9:21818201	9:22120503	splice-site	splice-site	deletion/read-through	downstream	upstream	6	1	0	123	100	medium	.	.	.	.	.	.	.
MCF-7 (ERR358488)	duplicate	MTAP	CDKN2B-AS1	+/+	+/+	9:21818201	9:22120199	splice-site	splice-site	deletion/read-through	downstream	upstream	1	0	2	123	92	medium	.	.	.	.	.	.	.
MCF-7 (ERR358488)	confirmed_by_structural_variant	MTAP	CDKN2A	+/+	-/+	9:21819535	9:21989620	intron	exon	deletion/read-through/5'-5'	downstream	upstream	8	8	33	37	49	medium	.	.	mismappers(3),mismatches(5)	.	.	.	.
MCF-7 (ERR358488)	non-validated	NCOA3	RP11-478L17.1(205547),RP11-110F24.1(29932)	+/+	./+	20:46131238	1:107292913	intron	intergenic	translocation	downstream	upstream	20	4	24	163	179	medium	.	.	duplicates(1)	.	.	.	.
MCF-7 (ERR358488)	non-validated	NUP98	RIC3	-/-	-/-	11:3735109	11:8148138	CDS	intron	duplication	upstream	downstream	2	8	37	270	27	medium	.	.	low_entropy(3),mismatches(3)	.	.	.	.
MCF-7 (ERR358488)	confirmed_by_structural_variant	ZNF217	BRIP1	-/-	-/+	20:52185501	17:59868733	3'UTR	intron	translocation/5'-5'	upstream	upstream	10	13	5	1225	57	medium	.	.	mismappers(9)	.	.	.	.
MCF-7 (ERR358488)	non-validated	PGGT1B	CTNNAP1	-/.	-/.	5:114555346	5:114725548	intron	exon	duplication	upstream	downstream	6	11	9	17	16	medium	.	.	.	.	.	.	.
MCF-7 (ERR358488)	confirmed_by_structural_variant	NAV1	RP11-510N19.3(1078),CRIP1P3(55747)	+/+	./+	1:201709204	1:202010140	splice-site	intergenic	deletion/read-through	downstream	upstream	0	7	16	40	35	medium	.	.	duplicates(1),mismappers(21)	.	.	.	.
MCF-7 (ERR358488)	confirmed_by_structural_variant	TDRKH	PRICKLE2	-/-	-/-	1:151745806	3:64319054	intron	intron	translocation	upstream	downstream	3	7	11	21	16	medium	.	.	.	.	.	.	.
MCF-7 (ERR358488)	non-validated	TRAPPC8	RP11-326K13.2(6423),RNF125(44404)	-/-	./-	18:29487530	18:29553931	CDS	intergenic	duplication	upstream	downstream	6	8	7	144	21	medium	.	.	mismappers(23)	.	.	.	.
MCF-7 (ERR358488)	non-validated	GREB1	E2F6	+/+	-/+	2:11730348	2:11589482	intron	intron	duplication/5'-5'	downstream	upstream	7	3	11	120	26	medium	.	.	mismappers(3),mismatches(1)	.	.	.	.
MCF-7 (ERR358488)	confirmed_by_structural_variant	PRPF18	BEND7	+/+	-/+	10:13655251	10:13532361	intron	intron	duplication/5'-5'	downstream	upstream	1	1	17	2	2	medium	.	.	.	.	.	.	.
MCF-7 (ERR358488)	non-validated	C14orf105(10552),SLC35F4(59503)	SLC35F4	./.	-/.	14:57971137	14:58032668	intergenic	intron	deletion/read-through	downstream	upstream	0	2	15	17	13	medium	.	.	mismappers(1)	.	.	.	.
MCF-7 (ERR358488)	confirmed_by_structural_variant	DHX30	RP11-588P8.1(165044),EMCN(14792)	+/+	./+	3:47866615	4:101301706	CDS	intergenic	translocation	downstream	upstream	6	5	6	171	10	medium	.	.	.	.	.	.	.
MCF-7 (ERR358488)	non-validated	ZNF595	RP11-1281K21.7(49936),RP11-241F15.1(190075)	+/.	./.	4:68717	4:49298868	intron	intergenic	inversion	downstream	downstream	0	0	17	256	20	medium	.	.	duplicates(1)	.	.	.	.
MCF-7 (ERR358488)	non-validated	HIPK1	DENND2C	+/+	-/-	1:114484078	1:115161106	CDS	intron	inversion	downstream	downstream	12	1	3	687	18	medium	.	.	low_entropy(1)	.	.	.	.
MCF-7 (ERR358488)	confirmed_by_structural_variant	RP11-356O9.2	TTC6	-/.	+/.	14:38032069	14:38066861	intron	intron	duplication/5'-5'	upstream	downstream	4	7	5	4	30	medium	.	.	mismappers(1)	.	.	.	.
MCF-7 (ERR358488)	duplicate	RP11-295P9.3	BEND7	+/+	-/+	10:13655251	10:13532361	intron	intron	duplication/5'-5'	downstream	upstream	1	1	12	2	2	medium	.	.	.	.	.	.	.
MCF-7 (ERR358488)	non-validated	DCP1A	SELK(54722),CABYRP1(101039)	-/-	./-	3:53322696	3:53980737	intron	intergenic	duplication	upstream	downstream	0	0	13	10	12	medium	.	.	mismappers(1)	.	.	.	.
MCF-7 (ERR358488)	duplicate	CTD-2192J16.24	HOOK2	-/-	-/-	19:12775209	19:12928493	intron	intron	duplication	upstream	downstream	5	0	8	205	167	medium	.	.	low_entropy(1)	.	.	.	.
MCF-7 (ERR358488)	non-validated	MTAP	RP11-408N14.1	+/+	-/+	9:21818201	9:22210663	splice-site	intron	deletion/read-through/5'-5'	downstream	upstream	6	2	4	123	17	medium	.	.	duplicates(1)	.	.	.	.
MCF-7 (ERR358488)	confirmed_by_structural_variant	ZBTB25	RP11-973N13.3(3639),RP11-973N13.2(68)	-/-	./-	14:64952683	14:65066893	3'UTR	intergenic	duplication	upstream	downstream	0	0	12	167	79	medium	.	.	.	.	.	.	.
MCF-7 (ERR358488)	non-validated	CTC-338M12.4	OR2V1(7076),OR2V2(22563)	+/+	./+	5:180674853	5:180559380	exon	intergenic	duplication	downstream	upstream	0	7	5	118	17	medium	.	.	mismappers(6)	.	.	.	.
MCF-7 (ERR358488)	non-validated	HIPK1	RNU7-14P(71668),AC006076.1(59397)	+/+	./+	1:114484081	20:52356965	CDS	intergenic	translocation	downstream	upstream	0	0	11	655	94	medium	.	.	.	.	.	.	.
MCF-7 (ERR358488)	non-validated	TRIM37	SKA2	-/-	-/-	17:57181654	17:57189706	splice-site	splice-site	duplication	upstream	downstream	2	5	4	2126	1110	medium	.	.	.	.	.	.	.
MCF-7 (ERR358488)	duplicate	TRIM37	SKA2	-/-	-/-	17:57183802	17:57189706	splice-site	splice-site	duplication	upstream	downstream	0	1	1	2449	1110	medium	.	.	.	.	.	.	.
MCF-7 (ERR358488)	confirmed_by_structural_variant	TEX14	PTPRT	-/-	-/+	17:56703153	20:41003198	intron	intron	translocation/5'-5'	upstream	upstream	0	4	6	21	23	medium	.	.	mismappers(15)	.	.	.	.
MCF-7 (ERR358488)	non-validated	CENPK	PPWD1	-/.	+/.	5:64851658	5:64879887	intron	intron	duplication/5'-5'	upstream	downstream	2	4	4	76	17	medium	.	.	mismappers(8),mismatches(1)	.	.	.	.
MCF-7 (ERR358488)	non-validated	RP11-132A1.4	AL021546.6	+/+	+/+	7:100954292	12:120879783	3'UTR	intron	translocation	downstream	upstream	0	0	10	174	14	medium	.	.	.	.	.	.	.
MCF-7 (ERR358488)	non-validated	SARS	KIAA1324	+/+	+/+	1:109774408	1:109704516	splice-site	splice-site	duplication	downstream	upstream	5	1	4	2246	1240	medium	.	.	.	.	.	.	.
MCF-7 (ERR358488)	confirmed_by_structural_variant	FNDC3B	PLOD2	+/+	-/+	3:172064962	3:145805962	intron	intron	duplication/5'-5'	downstream	upstream	0	3	6	5	7	medium	.	.	inconsistently_clipped(1),mismappers(5),mismatches(1)	.	.	.	.
MCF-7 (ERR358488)	non-validated	CYP2R1	CYP2R1	-/.	-/.	11:14911663	11:14912148	intron	intron	duplication	upstream	downstream	0	2	7	19	29	medium	.	.	.	.	.	.	.
MCF-7 (ERR358488)	non-validated	ARSG	AMZ2	+/+	+/+	17:66287709	17:66247191	splice-site	splice-site	duplication	downstream	upstream	0	7	1	84	1195	medium	.	.	.	.	.	.	.
MCF-7 (ERR358488)	duplicate	ARSG	AMZ2	+/+	+/+	17:66287709	17:66246935	splice-site	splice-site	duplication	downstream	upstream	0	1	1	84	1412	medium	.	.	.	.	.	.	.
MCF-7 (ERR358488)	non-validated	POFUT1	RP11-1281K21.7(60384),RP11-241F15.1(179627)	+/+	./+	20:30823874	4:49309316	3'UTR	intergenic	translocation	downstream	upstream	0	7	0	308	6	medium	.	.	.	.	.	.	.
MCF-7 (ERR358488)	non-validated	QTRT1	QTRT1	+/+	+/+	19:10821870	19:10820669	exon	intron	duplication	downstream	upstream	1	1	5	21	26	medium	.	.	.	.	.	.	.
MCF-7 (ERR358488)	duplicate	FNDC3B	RP11-274H2.2	+/+	+/+	3:172064962	3:145805962	intron	intron	duplication	downstream	upstream	0	3	3	5	7	medium	.	.	inconsistently_clipped(1),mismappers(4),mismatches(1)	.	.	.	.
MCF-7 (ERR358488)	validated	MTAP	UBA52P6	+/+	+/+	9:21818201	9:22012127	splice-site	5'UTR	deletion/read-through	downstream	upstream	1	2	3	123	11	medium	.	.	.	.	.	.	.
MCF-7 (ERR358488)	confirmed_by_structural_variant	C2orf43	C2orf43(15218),AC012361.1(21431)	-/-	./-	2:21022797	2:21038100	splice-site	intergenic	duplication	upstream	downstream	0	6	0	64	8	medium	.	.	.	.	.	.	.
MCF-7 (ERR358488)	validated	VAV3	AP4B1	-/-	-/+	1:108138847	1:114442543	CDS	CDS	inversion/5'-5'	upstream	upstream	0	0	6	1079	540	medium	.	.	.	.	.	.	.
MCF-7 (ERR358488)	non-validated	FBXO42	SZRD1	-/.	+/.	1:16667853	1:17036742	intron	intron	duplication/5'-5'	upstream	downstream	0	0	5	201	1	medium	.	.	mismappers(6)	.	.	.	.
MCF-7 (ERR358488)	non-validated	POFUT1	RP11-782C8.8(36303),RP11-435B5.1(60331)	+/+	./-	20:30823874	1:143282513	3'UTR	intergenic	translocation	downstream	downstream	0	2	3	308	2	medium	.	.	.	.	.	.	.
MCF-7 (ERR358488)	non-validated	ATXN7	RP5-947P14.1(351904),RP11-478L17.1(107939)	+/+	./+	3:63898902	1:106979025	intron	intergenic	translocation	downstream	upstream	0	0	5	573	9	medium	.	.	.	.	.	.	.
MCF-7 (ERR358488)	non-validated	DCUN1D2	DCUN1D2	-/-	-/-	13:114111447	13:114139183	3'UTR	intron	duplication	upstream	downstream	1	1	3	82	24	medium	.	.	.	.	.	.	.
MCF-7 (ERR358488)	non-validated	RP11-452L6.1(2973),RP11-452L6.5(245)	RP11-452L6.5	./.	-/.	16:31467787	16:31468831	intergenic	exon	duplication	upstream	downstream	1	0	4	18	64	medium	.	.	.	.	.	.	.
MCF-7 (ERR358488)	non-validated	BAGE2	PARP4P1(30220286),CTBP2P1(306)	-/-	./+	21:11054309	Y:59001085	intron	intergenic	translocation	upstream	upstream	0	0	5	4	10	medium	.	.	.	.	.	.	.
MCF-7 (ERR358488)	non-validated	AGAP3	HOXD11	+/+	+/+	7:150783901	2:176972316	CDS	CDS	translocation	downstream	upstream	5	0	0	91	1	medium	.	.	mismappers(1)	.	.	.	.
MCF-7 (ERR358488)	non-validated	RP11-544A12.5(3856),FAM78A(12496)	PRRC2B	./.	+/.	9:134120967	9:134294352	intergenic	intron	duplication	upstream	downstream	0	2	3	1	3	medium	.	.	.	.	.	.	.
MCF-7 (ERR358488)	non-validated	RAB3GAP1	TMEM163	+/+	-/+	2:135815271	2:135419557	intron	intron	duplication/5'-5'	downstream	upstream	2	1	1	3	2	medium	.	.	mismappers(2)	.	.	.	.
MCF-7 (ERR358488)	non-validated	ZNF709	ZNF709	-/-	-/-	19:12575167	19:12591947	CDS	intron	duplication	upstream	downstream	3	0	1	16	0	medium	.	.	.	.	.	.	.
MCF-7 (ERR358488)	duplicate	ZNF709	ZNF709	-/-	-/-	19:12575167	19:12591947	CDS	intron	duplication	upstream	downstream	3	0	1	16	0	medium	.	.	.	.	.	.	.
MCF-7 (ERR358488)	duplicate	ZNF709	ZNF709	-/-	-/-	19:12577276	19:12577664	splice-site	splice-site	duplication	upstream	downstream	1	0	0	28	17	low	.	.	.	.	.	.	.
MCF-7 (ERR358488)	duplicate	ZNF709	ZNF709	-/-	-/-	19:12577276	19:12577664	splice-site	splice-site	duplication	upstream	downstream	1	0	0	28	17	low	.	.	.	.	.	.	.
MCF-7 (ERR358488)	duplicate	ZNF709	ZNF709	-/-	-/-	19:12575167	19:12591947	CDS	intron	duplication	upstream	downstream	3	0	1	16	0	medium	.	.	.	.	.	.	.
MCF-7 (ERR358488)	duplicate	ZNF709	ZNF709	-/-	-/-	19:12575167	19:12591947	CDS	intron	duplication	upstream	downstream	3	0	1	16	0	medium	.	.	.	.	.	.	.
MCF-7 (ERR358488)	duplicate	ZNF709	CTD-3105H18.18	-/-	-/-	19:12575167	19:12591947	CDS	intron	duplication	upstream	downstream	3	0	1	16	0	medium	.	.	.	.	.	.	.
MCF-7 (ERR358488)	duplicate	ZNF709	CTD-3105H18.18	-/-	-/-	19:12577276	19:12577664	splice-site	splice-site	duplication	upstream	downstream	1	0	0	28	17	low	.	.	.	.	.	.	.
MCF-7 (ERR358488)	duplicate	ZNF709	CTD-3105H18.18	-/-	-/-	19:12575167	19:12591947	CDS	intron	duplication	upstream	downstream	3	0	1	16	0	medium	.	.	.	.	.	.	.
MCF-7 (ERR358488)	duplicate	ZNF709	CTD-3105H18.18	-/-	-/-	19:12577276	19:12577664	splice-site	splice-site	duplication	upstream	downstream	1	0	0	28	17	low	.	.	.	.	.	.	.
MCF-7 (ERR358488)	non-validated	TRRAP	AC002451.3(135518),DYNC1I1(23317)	+/+	./+	7:98579431	7:95378549	CDS	intergenic	duplication	downstream	upstream	0	0	4	311	5	medium	.	.	.	.	.	.	.
MCF-7 (ERR358488)	confirmed_by_structural_variant	SYNPR(28594),SNTN(7153)	AMPD1	./-	-/-	3:63631191	1:115231362	intergenic	splice-site	translocation	upstream	downstream	0	3	0	3	6	medium	.	.	low_entropy(1)	.	.	.	.
MCF-7 (ERR358488)	confirmed_by_structural_variant	NAV1	ELF3(242),RP11-510N19.2(11176)	+/.	./.	1:201732652	1:201986558	intron	intergenic	deletion/read-through	downstream	upstream	0	0	3	1	5	medium	.	.	.	.	.	.	.
MCF-7 (ERR358488)	non-validated	SMYD3	OR2B11(12335),OR2W5(26727)	-/.	./.	1:246644487	1:247627643	intron	intergenic	duplication	upstream	downstream	1	1	1	3	4	medium	.	.	.	.	.	.	.
MCF-7 (ERR358488)	non-validated	ZNF627	ZNF627	+/+	+/+	19:11708445	19:11702176	splice-site	intron	duplication	downstream	upstream	1	1	1	129	7	medium	.	.	mismatches(1)	.	.	.	.
MCF-7 (ERR358488)	non-validated	NPY5R(23108),RPL35AP12(7137)	MARCH1	./.	-/.	4:164296194	4:164448104	intergenic	3'UTR	duplication	upstream	downstream	2	0	1	6	41	medium	.	.	.	.	.	.	.
MCF-7 (ERR358488)	validated	CHEK2	CTA-292E10.6	-/-	+/-	22:29118242	22:29217199	intron	intron	duplication/5'-5'	upstream	downstream	1	0	2	4	7	medium	.	.	mismappers(2)	.	.	.	.
MCF-7 (ERR358488)	non-validated	THSD4	ANO10	+/+	-/-	15:71717793	3:43402323	intron	intron	translocation	downstream	downstream	0	0	3	1	4	medium	.	.	.	.	.	.	.
MCF-7 (ERR358488)	non-validated	RP1-178F10.3	SMCR8	+/+	+/+	17:18229026	17:18221964	exon	intron	duplication	downstream	upstream	0	1	2	198	15	medium	.	.	.	.	.	.	.
MCF-7 (ERR358488)	confirmed_by_structural_variant	GATAD2B(324),DENND4B(6202)	NUP210L	./-	-/-	1:153895775	1:154002530	intergenic	splice-site	duplication	upstream	downstream	1	0	2	5	15	medium	.	.	.	.	.	.	.
MCF-7 (ERR358488)	non-validated	CHD2	ASB9P1	+/+	+/+	15:93472321	15:93339004	splice-site	exon	duplication	downstream	upstream	1	0	2	304	31	medium	.	.	.	.	.	.	.
MCF-7 (ERR358488)	non-validated	PCMTD2	MYT1	+/+	+/+	20:62887223	20:62830215	splice-site	splice-site	duplication	downstream	upstream	2	0	1	206	18	medium	.	.	.	.	.	.	.
MCF-7 (ERR358488)	duplicate	MYT1	PCMTD2	+/+	+/+	20:62831275	20:62899240	splice-site	splice-site	deletion/read-through	downstream	upstream	1	4	4	24	321	low	.	.	low_entropy(2),mismappers(4)	.	.	.	.
MCF-7 (ERR358488)	duplicate	MYT1	PCMTD2	+/+	+/+	20:62831275	20:62899321	splice-site	splice-site	deletion/read-through	downstream	upstream	1	0	6	24	332	low	.	.	mismappers(2)	.	.	.	.
MCF-7 (ERR358488)	confirmed_by_structural_variant	SLC25A19	RN7SL603P(62642),ZFP64(48188)	-/.	./.	17:73276348	20:50620014	intron	intergenic	translocation	upstream	downstream	0	0	2	5	7	medium	.	.	mismappers(1)	.	.	.	.
MCF-7 (ERR358488)	confirmed_by_structural_variant	DDHD1	AL163953.3	-/.	+/.	14:53607750	14:53711661	intron	intron	duplication/5'-5'	upstream	downstream	0	1	1	0	1	medium	.	.	duplicates(1),mismappers(1)	.	.	.	.
MCF-7 (ERR358488)	validated	B3GNTL1	SLC9A8	-/-	+/+	17:80914571	20:48494518	splice-site	splice-site	translocation	upstream	upstream	0	2	0	24	48	medium	.	.	.	.	.	.	.
MCF-7 (ERR358488)	confirmed_by_structural_variant	ARHGAP10	RP11-752L20.1(6010),EDNRA(15586)	+/+	./+	4:148944564	4:148386483	splice-site	intergenic	duplication	downstream	upstream	1	0	1	106	0	medium	.	.	.	.	.	.	.
MCF-7 (ERR358488)	confirmed_by_structural_variant	ARHGAP10	EDNRA	+/+	+/+	4:148944564	4:148406764	splice-site	splice-site	duplication	downstream	upstream	1	0	1	106	1	medium	.	.	.	.	.	.	.
MCF-7 (ERR358488)	confirmed_by_structural_variant	RP5-1073O3.2	PTPN22	+/+	-/-	1:114355234	1:114375760	splice-site	splice-site	inversion	downstream	downstream	1	1	0	8	9	medium	.	.	.	.	.	.	.
MCF-7 (ERR358488)	duplicate	RP5-1073O3.2	PTPN22	+/+	-/-	1:114355447	1:114375760	splice-site	splice-site	inversion	downstream	downstream	1	0	1	20	9	medium	.	.	.	.	.	.	.
MCF-7 (ERR358488)	non-validated	VGLL4	TAMM41	-/-	-/-	3:11712736	3:11871338	splice-site	splice-site	duplication	upstream	downstream	1	0	0	11	213	medium	.	.	.	.	.	.	.
MCF-7 (ERR358488)	duplicate	VGLL4	TAMM41	-/-	-/-	3:11744445	3:11871338	splice-site	splice-site	duplication	upstream	downstream	1	0	0	485	213	medium	.	.	.	.	.	.	.
MCF-7 (ERR358488)	non-validated	ARMC9	ARMC9	+/+	+/+	2:232143171	2:232135695	splice-site	splice-site	duplication/non-canonical_splicing	downstream	upstream	7	10	3	109	69	low	.	.	.	.	.	.	.
MCF-7 (ERR358488)	non-validated	TRIO	TRIO	+/+	+/+	5:14316852	5:14316622	splice-site	splice-site	duplication/non-canonical_splicing	downstream	upstream	4	8	0	81	110	low	.	.	inconsistently_clipped(2),same_gene(6)	.	.	.	.
MCF-7 (ERR358488)	confirmed_by_structural_variant	ARFGEF1	ARFGEF1	-/-	-/-	8:68139682	8:68152525	splice-site	splice-site	duplication/non-canonical_splicing	upstream	downstream	4	3	2	128	109	low	.	.	.	.	.	.	.
MCF-7 (ERR358488)	non-validated	TRMT61B	PPP1CB	-/-	+/-	2:29083984	2:29022180	splice-site	3'UTR	deletion/read-through/5'-5'	upstream	downstream	1	3	4	97	1503	low	.	.	low_entropy(1)	.	.	.	.
MCF-7 (ERR358488)	non-validated	LINC00176	TCEA2	+/+	+/+	20:62669555	20:62693783	splice-site	splice-site	deletion/read-through	downstream	upstream	2	2	3	60	42	low	.	.	.	.	.	.	.
MCF-7 (ERR358488)	duplicate	LINC00176	TCEA2	+/+	+/+	20:62669555	20:62697829	splice-site	splice-site	deletion/read-through	downstream	upstream	0	1	0	60	263	low	.	.	low_entropy(1)	.	.	.	.
MCF-7 (ERR358488)	non-validated	NFATC4	NYNRIN	+/+	+/+	14:24846084	14:24868436	splice-site	splice-site	deletion/read-through	downstream	upstream	0	1	6	1342	201	low	.	.	low_entropy(1),mismatches(1)	.	.	.	.
MCF-7 (ERR358488)	duplicate	NFATC4	NYNRIN	+/+	+/+	14:24843672	14:24868436	splice-site	splice-site	deletion/read-through	downstream	upstream	2	3	1	759	201	low	.	.	.	.	.	.	.
MCF-7 (ERR358488)	duplicate	NFATC4	NYNRIN	+/+	+/+	14:24843672	14:24877075	splice-site	splice-site	deletion/read-through	downstream	upstream	0	1	0	759	90	low	.	.	.	.	.	.	.
MCF-7 (ERR358488)	non-validated	HOXC13(3592),HOXC12(4698)	HOXC11	./+	+/+	12:54343920	12:54368965	intergenic	splice-site	deletion/read-through	downstream	upstream	1	1	3	27	277	low	.	.	.	.	.	.	.
MCF-7 (ERR358488)	non-validated	TP53BP1	TP53BP1	-/-	-/-	15:43724392	15:43773220	splice-site	splice-site	duplication/non-canonical_splicing	upstream	downstream	2	2	1	249	167	low	.	.	.	.	.	.	.
MCF-7 (ERR358488)	non-validated	RP11-108K3.1	GLDN	+/+	+/+	15:51573504	15:51675633	intron	splice-site	deletion/read-through	downstream	upstream	0	2	3	87	12	low	.	.	.	.	.	.	.
MCF-7 (ERR358488)	duplicate	RP11-108K3.1	GLDN	+/+	+/+	15:51570247	15:51675633	splice-site	splice-site	deletion/read-through	downstream	upstream	1	0	2	81	12	low	.	.	.	.	.	.	.
MCF-7 (ERR358488)	duplicate	RP11-108K3.1	GLDN	+/+	+/+	15:51329878	15:51675982	splice-site	splice-site	deletion/read-through	downstream	upstream	1	0	1	57	15	low	.	.	.	.	.	.	.
MCF-7 (ERR358488)	non-validated	SLC30A5	CTC-498J12.3(23015),RN7SL103P(627)	+/+	./+	5:68426374	5:68455236	3'UTR	intergenic	deletion/read-through	downstream	upstream	0	0	5	179	12	low	.	.	.	.	.	.	.
MCF-7 (ERR358488)	duplicate	SLC30A5	CTC-498J12.3(23015),RN7SL103P(627)	+/+	./+	5:68426374	5:68455236	3'UTR	intergenic	deletion/read-through	downstream	upstream	0	0	5	179	12	low	.	.	.	.	.	.	.
MCF-7 (ERR358488)	non-validated	CYSTM1	PURA	+/+	+/+	5:139554870	5:139493626	splice-site	splice-site	duplication	downstream	upstream	1	3	1	467	72	low	.	.	.	.	.	.	.
MCF-7 (ERR358488)	non-validated	AL353698.1(32033),KLF8(124807)	KLF8	./+	+/+	X:56134047	X:56291613	intergenic	splice-site	deletion/read-through	downstream	upstream	2	0	2	36	20	low	.	.	.	.	.	.	.
MCF-7 (ERR358488)	non-validated	CCDC7	C10orf68	+/+	+/+	10:32762951	10:33067905	splice-site	splice-site	deletion/read-through	downstream	upstream	2	1	1	33	8	low	.	.	.	.	.	.	.
MCF-7 (ERR358488)	duplicate	CCDC7	C10orf68	+/+	+/+	10:32790939	10:33047340	intron	intron	deletion/read-through	downstream	upstream	0	0	2	3	2	low	.	.	mismappers(2)	.	.	.	.
MCF-7 (ERR358488)	non-validated	LETM1(2222),RN7SL671P(10591)	WHSC1	./+	+/+	4:1860196	4:1893893	intergenic	splice-site	deletion/read-through	downstream	upstream	1	0	3	9	37	low	.	.	mismappers(2)	.	.	.	.
MCF-7 (ERR358488)	non-validated	RN7SL569P(50418),RNY5(555)	EZH2	./-	-/-	7:148638025	7:148572933	intergenic	intron	deletion/read-through	upstream	downstream	1	0	3	4	3	low	.	.	.	.	.	.	.
MCF-7 (ERR358488)	non-validated	ARPC1A	CPSF4	+/+	+/+	7:98923627	7:99042412	splice-site	splice-site	deletion/read-through	downstream	upstream	0	3	1	1688	546	low	.	.	low_entropy(1)	.	.	.	.
MCF-7 (ERR358488)	non-validated	TM2D3	PCSK6(21808),RP11-14C10.1(15526)	-/-	./-	15:102166651	15:102087213	splice-site	intergenic	deletion/read-through	upstream	downstream	0	1	2	19	12	low	.	.	.	.	.	.	.
MCF-7 (ERR358488)	non-validated	RP11-435O5.2	FANCC	-/-	-/-	9:98189006	9:98011651	splice-site	splice-site	deletion/read-through	upstream	downstream	0	3	0	52	133	low	.	.	.	.	.	.	.
MCF-7 (ERR358488)	non-validated	ASCL2	MIR4686(37830),ASCL2(57527)	-/-	./-	11:2290963	11:2232198	splice-site	intergenic	deletion/read-through	upstream	downstream	0	2	1	351	8	low	.	.	.	.	.	.	.
MCF-7 (ERR358488)	non-validated	ZNF337	RP4-694B14.5	-/+	+/+	20:25669629	20:25608026	intron	intron	duplication/3'-3'	downstream	upstream	0	0	3	54	15	low	.	.	mismappers(3),same_gene(7),small_insert_size(1)	.	.	.	.
MCF-7 (ERR358488)	non-validated	RP11-281J9.2	WWOX	-/-	+/-	16:78048917	16:78594933	exon	intron	duplication/5'-5'	upstream	downstream	0	0	3	2	3	low	.	.	.	.	.	.	.
MCF-7 (ERR358488)	non-validated	AP000525.9	AP000525.9	-/-	-/-	22:16155002	22:16186835	intron	exon	duplication	upstream	downstream	1	2	0	24	72	low	.	.	.	.	.	.	.
MCF-7 (ERR358488)	validated	ESR1	CCDC170	+/+	+/+	6:152023140	6:151857453	splice-site	splice-site	duplication	downstream	upstream	1	0	2	54	95	low	.	.	.	.	.	.	.
MCF-7 (ERR358488)	non-validated	ORMDL1	OSGEPL1	-/-	-/-	2:190640291	2:190617705	splice-site	splice-site	deletion/read-through	upstream	downstream	1	1	0	385	99	low	.	.	mismappers(1)	.	.	.	.
MCF-7 (ERR358488)	confirmed_by_structural_variant	SKA2	VMP1	-/+	+/+	17:57199784	17:57906927	intron	intron	deletion/3'-3'	downstream	upstream	1	0	1	2	1	low	.	.	mismappers(1)	.	.	.	.
MCF-7 (ERR358488)	non-validated	SRGAP2B	SRGAP2C	+/+	+/+	1:144014093	1:121115832	splice-site	splice-site	duplication	downstream	upstream	0	1	1	460	62	low	.	.	.	.	.	.	.
MCF-7 (ERR358488)	non-validated	RP11-624L4.1	ENAH	-/-	-/-	15:39713110	1:225707267	splice-site	splice-site	translocation	upstream	downstream	0	2	0	14	458	low	.	.	.	.	.	.	.
MCF-7 (ERR358488)	non-validated	ESR1	MTHFD1L	+/+	+/+	6:152163922	6:151413603	splice-site	splice-site	duplication	downstream	upstream	0	1	1	490	255	low	.	.	.	.	.	.	.
MCF-7 (ERR358488)	non-validated	USP3	RP11-321G12.1	+/+	+/+	15:63797029	15:63690586	splice-site	splice-site	duplication	downstream	upstream	1	0	1	815	27	low	.	.	.	.	.	.	.
MCF-7 (ERR358488)	confirmed_by_structural_variant	ZBTB25	RP11-973N13.3	-/-	-/-	14:64957079	14:65019606	splice-site	splice-site	duplication	upstream	downstream	1	0	1	299	6	low	.	.	.	.	.	.	.
MCF-7 (ERR358488)	validated	RPS6KB1	VMP1	+/+	+/+	17:57970686	17:57915656	splice-site	splice-site	duplication	downstream	upstream	1	0	1	1672	2791	low	.	.	.	.	.	.	.
MCF-7 (ERR358488)	non-validated	RP11-120D5.1	MID1	-/-	-/-	X:11074056	X:10588459	splice-site	splice-site	deletion	upstream	downstream	0	1	0	31	3	low	.	.	.	.	.	.	.
MCF-7 (ERR358488)	duplicate	GNG7	ZNF395	-/-	-/-	19:2555147	8:28218699	splice-site	splice-site	translocation	upstream	downstream	1	0	0	24	58	low	.	.	.	.	.	.	.
MCF-7 (ERR358488)	non-validated	SNHG7	CCDC57	-/-	-/-	9:139619507	17:80146295	splice-site	splice-site	translocation	upstream	downstream	0	1	0	2187	116	low	.	.	.	.	.	.	.
MCF-7 (ERR358488)	non-validated	OARD1	ZFAND3	-/-	+/+	6:41038871	6:38120011	splice-site	splice-site	inversion	upstream	upstream	1	0	0	499	769	low	.	.	.	.	.	.	.
MCF-7 (ERR358488)	non-validated	POLE2	NEMF	-/-	-/-	14:50116983	14:50256291	splice-site	splice-site	duplication	upstream	downstream	0	1	0	164	386	low	.	.	.	.	.	.	.
MCF-7 (ERR358488)	non-validated	DPY19L4	ESRP1	+/+	+/+	8:95752018	8:95709080	splice-site	splice-site	duplication	downstream	upstream	0	1	0	314	1009	low	.	.	.	.	.	.	.
MCF-7 (ERR358488)	non-validated	GATC	COX6A1	+/+	+/+	12:120884632	12:120878257	splice-site	splice-site	duplication	downstream	upstream	0	1	0	362	8313	low	.	.	.	.	.	.	.
MCF-7 (SRR064286)	validated	BCAS4	BCAS3	+/+	+/+	20:49411710	17:59445688	splice-site	splice-site	translocation	downstream	upstream	28	6	154	248	286	high	.	.	duplicates(18),mismappers(2)	.	.	.	.
MCF-7 (SRR064286)	duplicate	BCAS4	BCAS3	+/+	+/+	20:49411710	17:59430949	splice-site	splice-site	translocation	downstream	upstream	4	0	166	248	10	high	.	.	duplicates(8),mismappers(2),mismatches(1)	.	.	.	.
MCF-7 (SRR064286)	validated	ARFGEF2	SULF2	+/+	-/-	20:47538547	20:46365686	splice-site	splice-site	inversion	downstream	downstream	0	4	15	27	72	high	.	.	.	.	.	.	.
MCF-7 (SRR064286)	confirmed_by_structural_variant	NCOA3	RP11-478L17.1(36653),RP11-110F24.1(198826)	+/+	./+	20:46130763	1:107124019	splice-site	intergenic	translocation	downstream	upstream	3	4	10	126	17	high	.	.	low_entropy(3),mismatches(2)	.	.	.	.
MCF-7 (SRR064286)	confirmed_by_structural_variant	ATXN7	RP5-947P14.1(131806),RP11-478L17.1(328037)	+/+	./+	3:63898901	1:106758927	splice-site	intergenic	translocation	downstream	upstream	1	1	13	23	18	high	.	.	.	.	.	.	.
MCF-7 (SRR064286)	validated	AC099850.1	VMP1	+/+	+/+	17:57184952	17:57915656	splice-site	splice-site	deletion	downstream	upstream	2	2	6	11	116	high	.	.	.	.	.	.	.
MCF-7 (SRR064286)	validated	RPS6KB1	VMP1	+/+	+/+	17:57992064	17:57917129	splice-site	splice-site	duplication	downstream	upstream	2	3	5	72	126	high	.	.	duplicates(1)	.	.	.	.
MCF-7 (SRR064286)	validated	RSBN1	AP4B1-AS1	-/-	+/+	1:114354332	1:114442494	splice-site	splice-site	inversion	upstream	upstream	3	2	2	19	6	high	.	.	.	.	.	.	.
MCF-7 (SRR064286)	confirmed_by_structural_variant	BCAS3	SNTN(39526),AC136289.1(23747)	+/+	./+	17:58824640	3:63704222	splice-site	intergenic	translocation	downstream	upstream	1	4	2	22	7	high	.	.	.	.	.	.	.
MCF-7 (SRR064286)	non-validated	PREX1	RP1-148H17.1(44376),RPL35AP(21511)	-/-	./-	20:47292731	20:46085447	splice-site	intergenic	deletion	upstream	downstream	0	4	2	196	11	high	.	.	.	.	.	.	.
MCF-7 (SRR064286)	non-validated	PPM1D	USP32	+/+	-/+	17:58678247	17:58342944	splice-site	intron	duplication/5'-5'	downstream	upstream	1	1	3	52	5	high	.	.	mismappers(1)	.	.	.	.
MCF-7 (SRR064286)	validated	PAPOLA	AK7	+/+	+/+	14:96968937	14:96904172	splice-site	splice-site	duplication	downstream	upstream	0	3	2	104	9	high	.	.	mismatches(1)	.	.	.	.
MCF-7 (SRR064286)	validated	SMARCA4	CARM1	+/+	+/+	19:11097269	19:11015627	splice-site	splice-site	duplication	downstream	upstream	1	1	3	31	15	high	.	.	.	.	.	.	.
MCF-7 (SRR064286)	validated	MYO9B	FCHO1	+/+	+/+	19:17213367	19:17881234	splice-site	splice-site	deletion	downstream	upstream	0	1	3	6	2	high	.	.	.	.	.	.	.
MCF-7 (SRR064286)	non-validated	LRP1B	PLXDC1	-/-	-/-	2:142237965	17:37265644	splice-site	splice-site	translocation	upstream	downstream	0	1	3	17	6	high	.	.	duplicates(1)	.	.	.	.
MCF-7 (SRR064286)	duplicate	LRP1B	PLXDC1	-/-	-/-	2:142237965	17:37239793	splice-site	splice-site	translocation	upstream	downstream	1	0	0	17	2	medium	.	.	.	.	.	.	.
MCF-7 (SRR064286)	validated	SULF2	PRICKLE2	-/-	-/-	20:46414087	3:64085601	splice-site	splice-site	translocation	upstream	downstream	0	1	3	8	4	high	.	.	.	.	.	.	.
MCF-7 (SRR064286)	confirmed_by_structural_variant	RSBN1	VAV3	-/-	-/+	1:114354332	1:108152010	splice-site	intron	inversion/5'-5'	upstream	upstream	0	1	2	19	5	high	.	.	.	.	.	.	.
MCF-7 (SRR064286)	validated	C16orf45	ABCC1	+/+	+/+	16:15528616	16:16170183	splice-site	splice-site	deletion	downstream	upstream	1	0	1	12	7	high	.	.	.	.	.	.	.
MCF-7 (SRR064286)	duplicate	RP11-1021N1.1	ABCC1	+/+	+/+	16:15528616	16:16170183	splice-site	splice-site	deletion	downstream	upstream	1	0	1	12	7	high	.	.	.	.	.	.	.
MCF-7 (SRR064286)	confirmed_by_structural_variant	ATXN7	RP5-947P14.1(173551),RP11-478L17.1(286292)	+/+	./+	3:63898901	1:106800672	splice-site	intergenic	translocation	downstream	upstream	0	1	1	23	6	high	.	.	.	.	.	.	.
MCF-7 (SRR064286)	non-validated	BPTF	PITPNC1	+/+	+/+	17:65909303	17:65548373	splice-site	splice-site	duplication	downstream	upstream	1	1	0	28	21	high	.	.	.	.	.	.	.
MCF-7 (SRR064286)	non-validated	SULF2	ZNF217	-/-	-/+	20:46415149	20:52210646	5'UTR	intron	inversion/5'-5'	upstream	upstream	6	2	17	77	38	medium	.	.	duplicates(1)	.	.	.	.
MCF-7 (SRR064286)	confirmed_by_structural_variant	FOXA1	TTC6	-/-	+/-	14:38061535	14:38184711	CDS	intron	duplication/5'-5'	upstream	downstream	2	2	19	116	24	medium	.	.	.	.	.	.	.
MCF-7 (SRR064286)	validated	GCN1L1	MSI1	-/-	-/-	12:120628125	12:120785287	CDS	CDS	duplication	upstream	downstream	0	0	7	29	12	medium	.	.	.	.	.	.	.
MCF-7 (SRR064286)	non-validated	RP11-478L17.1(205547),RP11-110F24.1(29932)	NCOA3	./.	+/.	1:107292913	20:46131238	intergenic	intron	translocation	upstream	downstream	1	0	5	19	4	medium	.	.	.	.	.	.	.
MCF-7 (SRR064286)	non-validated	KIAA1919	AMD1	+/+	+/+	6:111580695	6:111208720	5'UTR	CDS	duplication	downstream	upstream	0	0	5	6	28	medium	.	.	duplicates(1)	.	.	.	.
MCF-7 (SRR064286)	non-validated	NDFIP2	BCAS2P3(107114),RBM26(37828)	+/+	./+	13:80095110	13:79848134	splice-site	intergenic	duplication	downstream	upstream	2	0	0	13	5	medium	.	.	.	.	.	.	.
MCF-7 (SRR064286)	confirmed_by_structural_variant	DDX42	SLC2A10(4322),AL031055.1(70190)	+/+	./+	17:61882535	20:45369287	splice-site	intergenic	translocation	downstream	upstream	0	2	0	32	3	medium	.	.	.	.	.	.	.
MCF-7 (SRR064286)	validated	TAF4	BRIP1	-/-	-/-	20:60639507	17:59926617	splice-site	splice-site	translocation	upstream	downstream	2	0	0	18	16	medium	.	.	.	.	.	.	.
MCF-7 (SRR064286)	non-validated	BRD3	RGS3	-/-	+/-	9:136897456	9:116233945	3'UTR	intron	deletion/5'-5'	upstream	downstream	0	0	2	9	3	medium	.	.	.	.	.	.	.
MCF-7 (SRR064286)	validated	GATAD2B	NUP210L	-/-	-/-	1:153865801	1:154000073	intron	CDS	duplication	upstream	downstream	0	0	2	2	5	medium	.	.	mismappers(1)	.	.	.	.
MCF-7 (SRR064286)	non-validated	KRT18P13	RP11-361D14.2(63221),KRT18P51(16)	+/+	./-	9:100462974	4:145493374	exon	intergenic	translocation	downstream	downstream	0	0	2	14	41	medium	.	.	.	.	.	.	.
MCF-7 (SRR064286)	validated	NAV1	GPR37L1	+/+	+/+	1:201687883	1:202096869	splice-site	splice-site	deletion	downstream	upstream	0	1	0	1	1	medium	.	.	.	.	.	.	.
MCF-7 (SRR064286)	duplicate	NAV1	GPR37L1	+/+	+/+	1:201709204	1:202096869	splice-site	splice-site	deletion/read-through	downstream	upstream	0	1	0	4	1	low	.	.	.	.	.	.	.
MCF-7 (SRR064286)	confirmed_by_structural_variant	DYNC1H1	DYNC1H1	+/+	+/+	14:102500789	14:102466326	splice-site	splice-site	duplication/non-canonical_splicing	downstream	upstream	0	7	4	41	38	low	.	.	.	.	.	.	.
MCF-7 (SRR064286)	confirmed_by_structural_variant	CDKN2A	MTAP	-/-	+/-	9:21989622	9:21819533	exon	intron	deletion/read-through/5'-5'	upstream	downstream	0	0	3	5	2	low	.	.	.	.	.	.	.
MCF-7 (SRR064286)	non-validated	C10orf112	PLXDC2	+/+	+/+	10:20079118	10:20290704	exon	splice-site	deletion/read-through	downstream	upstream	0	1	2	9	7	low	.	.	.	.	.	.	.
MCF-7 (SRR064286)	non-validated	TRIM33	TRIM33	-/-	-/+	1:115053172	1:115042966	splice-site	intron	inversion/5'-5'	upstream	upstream	2	1	0	15	2	low	.	.	.	.	.	.	.
MCF-7 (SRR064286)	validated	ATP1A1	ZFP64	+/+	-/-	1:116939356	20:50668671	splice-site	splice-site	translocation	downstream	downstream	0	2	0	156	4	low	.	.	.	.	.	.	.
MCF-7 (SRR534293)	non-validated	TANC2	CA4	+/+	+/+	17:61151375	17:58232675	splice-site	splice-site	duplication	downstream	upstream	301	302	298	1283	1850	high	.	.	duplicates(187),inconsistently_clipped(3),mismappers(2),mismatches(5)	.	.	.	.
MCF-7 (SRR534293)	duplicate	TANC2	CA4	+/+	+/+	17:61151375	17:58228803	splice-site	splice-site	duplication	downstream	upstream	1	4	298	1283	65	high	.	.	duplicates(54),mismappers(2)	.	.	.	.
MCF-7 (SRR534293)	duplicate	TANC2	CA4	+/+	+/+	17:61151375	17:58233921	splice-site	splice-site	duplication	downstream	upstream	1	1	52	1283	2017	high	.	.	duplicates(13)	.	.	.	.
MCF-7 (SRR534293)	duplicate	TANC2	CA4	+/-	+/+	17:61176506	17:58232675	intron	splice-site	inversion/3'-3'	upstream	upstream	5	15	23	448	1850	high	.	.	duplicates(26)	.	.	.	.
MCF-7 (SRR534293)	duplicate	TANC2	CA4	+/+	+/+	17:61086987	17:58232675	splice-site	splice-site	duplication	downstream	upstream	1	4	32	1999	1850	high	.	.	duplicates(27),mismatches(1)	.	.	.	.
MCF-7 (SRR534293)	duplicate	TANC2	CA4	+/+	+/+	17:61151375	17:58247912	splice-site	splice-site	duplication	downstream	upstream	2	0	0	1283	2006	medium	.	.	.	.	.	.	.
MCF-7 (SRR534293)	confirmed_by_structural_variant	FOXA1	TTC6	-/-	+/-	14:38061535	14:38184711	CDS	intron	duplication/5'-5'	upstream	downstream	209	302	112	4262	1160	high	.	.	duplicates(133),inconsistently_clipped(1),low_entropy(3),mismatches(1),small_insert_size(3)	.	.	.	.
MCF-7 (SRR534293)	validated	ARFGEF2	SULF2	+/+	-/-	20:47538547	20:46365686	splice-site	splice-site	inversion	downstream	downstream	68	120	231	395	1888	high	.	.	duplicates(156),mismatches(1)	.	.	.	.
MCF-7 (SRR534293)	validated	ABCA5	PPP4R1L	-/-	-/-	17:67309233	20:56847931	splice-site	splice-site	translocation	upstream	downstream	82	125	199	1052	762	high	.	.	duplicates(139),low_entropy(13),mismatches(1)	.	.	.	.
MCF-7 (SRR534293)	duplicate	ABCA5	PPP4R1L	-/-	-/-	17:67309233	20:56847927	splice-site	splice-site	translocation	upstream	downstream	1	2	180	1052	762	high	.	.	duplicates(69)	.	.	.	.
MCF-7 (SRR534293)	duplicate	ABCA5	PPP4R1L	-/-	-/-	17:67323193	20:56826920	splice-site	splice-site	translocation	upstream	downstream	0	1	0	246	1156	medium	.	.	.	.	.	.	.
MCF-7 (SRR534293)	non-validated	PPP4R1L	TBX4(5821),NACA2(99502)	-/-	./-	20:56809902	17:59568292	intron	intergenic	translocation	upstream	downstream	87	76	226	620	163	high	.	.	duplicates(116)	.	.	.	.
MCF-7 (SRR534293)	non-validated	GSN	SMIM22	+/+	+/+	9:124043840	16:4844953	splice-site	splice-site	translocation	downstream	upstream	23	39	300	556	137	high	.	.	duplicates(102)	.	.	.	.
MCF-7 (SRR534293)	duplicate	GSN	SMIM22	+/+	+/+	9:124045670	16:4844953	splice-site	splice-site	translocation	downstream	upstream	3	0	300	49	137	high	.	.	duplicates(75)	.	.	.	.
MCF-7 (SRR534293)	duplicate	GSN	SMIM22	+/+	+/+	9:124044231	16:4844953	splice-site	splice-site	translocation	downstream	upstream	0	2	300	25	137	high	.	.	duplicates(75)	.	.	.	.
MCF-7 (SRR534293)	duplicate	GSN	SMIM22	+/+	+/+	9:124049039	16:4844953	splice-site	splice-site	translocation	downstream	upstream	1	1	300	17	137	high	.	.	duplicates(77)	.	.	.	.
MCF-7 (SRR534293)	duplicate	GSN	SMIM22	+/+	+/+	9:124044828	16:4844953	splice-site	splice-site	translocation	downstream	upstream	1	0	300	52	137	high	.	.	duplicates(75)	.	.	.	.
MCF-7 (SRR534293)	duplicate	GSN	SMIM22	+/+	+/+	9:124043840	16:4839941	splice-site	splice-site	translocation	downstream	upstream	0	4	295	556	29	high	.	.	duplicates(75),mismappers(5)	.	.	.	.
MCF-7 (SRR534293)	duplicate	GSN	SMIM22	+/+	+/+	9:124044828	16:4839941	splice-site	splice-site	translocation	downstream	upstream	0	0	296	52	29	high	.	.	duplicates(71),mismappers(5)	.	.	.	.
MCF-7 (SRR534293)	duplicate	GSN	SMIM22	+/+	+/+	9:124045670	16:4839941	splice-site	splice-site	translocation	downstream	upstream	0	0	296	49	29	high	.	.	duplicates(72),mismappers(5)	.	.	.	.
MCF-7 (SRR534293)	validated	BCAS4	BCAS3	+/+	+/+	20:49411710	17:59445688	splice-site	splice-site	translocation	downstream	upstream	9	81	254	699	944	high	.	.	duplicates(100),mismatches(1)	.	.	.	.
MCF-7 (SRR534293)	duplicate	BCAS4	BCAS3	+/+	+/+	20:49411710	17:59430949	splice-site	splice-site	translocation	downstream	upstream	1	11	298	699	150	high	.	.	duplicates(60),mismappers(2),mismatches(1)	.	.	.	.
MCF-7 (SRR534293)	duplicate	BCAS4	BCAS3	+/+	+/+	20:49411710	17:59431723	splice-site	splice-site	translocation	downstream	upstream	0	1	260	699	190	high	.	.	duplicates(71),mismappers(2),mismatches(1)	.	.	.	.
MCF-7 (SRR534293)	non-validated	ZNF217	SULF2	-/-	-/+	20:52200083	20:46414874	intron	5'UTR	inversion/5'-5'	upstream	upstream	37	60	186	158	2920	high	.	.	duplicates(71),low_entropy(2)	.	.	.	.
MCF-7 (SRR534293)	confirmed_by_structural_variant	ATXN7	RP5-947P14.1(131806),RP11-478L17.1(328037)	+/+	./+	3:63898901	1:106758927	splice-site	intergenic	translocation	downstream	upstream	81	95	28	611	239	high	.	.	duplicates(89),low_entropy(2),mismappers(25)	.	.	.	.
MCF-7 (SRR534293)	confirmed_by_structural_variant	TRAPPC4	DSCAML1	+/+	-/+	11:118892596	11:117386244	splice-site	intron	duplication/5'-5'	downstream	upstream	100	18	27	408	72	high	.	.	duplicates(31),mismatches(1)	.	.	.	.
MCF-7 (SRR534293)	confirmed_by_structural_variant	MTAP	CDKN2A	+/+	-/+	9:21819535	9:21989620	intron	exon	deletion/read-through/5'-5'	downstream	upstream	29	43	69	326	233	high	.	.	duplicates(48),mismappers(8),mismatches(10)	.	.	.	.
MCF-7 (SRR534293)	confirmed_by_structural_variant	DDX42	SLC2A10(3387),AL031055.1(71125)	+/+	./+	17:61883134	20:45368352	exon	intergenic	translocation	downstream	upstream	45	52	35	455	181	high	.	.	duplicates(57),mismappers(1)	.	.	.	.
MCF-7 (SRR534293)	confirmed_by_structural_variant	SARNP	RNU1-69P	-/-	+/-	12:56194638	12:56268549	splice-site	exon	duplication/5'-5'	upstream	downstream	93	16	3	748	62	high	.	.	duplicates(36),mismappers(2)	.	.	.	.
MCF-7 (SRR534293)	duplicate	RP11-762I7.5	RNU1-69P	-/-	+/-	12:56194638	12:56268549	splice-site	exon	duplication/5'-5'	upstream	downstream	93	16	3	748	62	high	.	.	duplicates(36),mismappers(2)	.	.	.	.
MCF-7 (SRR534293)	validated	ADAMTS19	SLC27A6	+/+	+/+	5:128797450	5:128364038	splice-site	splice-site	duplication	downstream	upstream	19	35	49	172	215	high	.	.	duplicates(31),mismatches(2)	.	.	.	.
MCF-7 (SRR534293)	duplicate	ADAMTS19	SLC27A6	+/+	+/+	5:128796175	5:128364038	splice-site	splice-site	duplication	downstream	upstream	8	3	20	369	215	high	.	.	duplicates(7)	.	.	.	.
MCF-7 (SRR534293)	confirmed_by_structural_variant	NCOA3	RP11-478L17.1(36653),RP11-110F24.1(198826)	+/+	./+	20:46130763	1:107124019	splice-site	intergenic	translocation	downstream	upstream	6	28	67	2073	137	high	.	.	duplicates(26)	.	.	.	.
MCF-7 (SRR534293)	validated	MYO9B	FCHO1	+/+	+/+	19:17213367	19:17881234	splice-site	splice-site	deletion	downstream	upstream	31	18	43	246	81	high	.	.	duplicates(34),low_entropy(1)	.	.	.	.
MCF-7 (SRR534293)	duplicate	MYO9B	FCHO1	+/+	+/+	19:17213367	19:17881273	splice-site	splice-site	deletion	downstream	upstream	1	0	17	246	97	high	.	.	duplicates(5)	.	.	.	.
MCF-7 (SRR534293)	duplicate	MYO9B	FCHO1	+/+	+/+	19:17213367	19:17881601	splice-site	splice-site	deletion	downstream	upstream	3	2	3	246	70	high	.	.	duplicates(1)	.	.	.	.
MCF-7 (SRR534293)	confirmed_by_structural_variant	ATP9A	RNU7-92P(41182),RP11-347D21.1(5194)	-/-	./+	20:50255882	20:46574349	splice-site	intergenic	inversion	upstream	upstream	48	12	24	549	110	high	.	.	duplicates(28),mismatches(1)	.	.	.	.
MCF-7 (SRR534293)	validated	GCN1L1	MSI1	-/-	-/-	12:120628101	12:120785317	splice-site	splice-site	duplication	upstream	downstream	7	9	57	342	130	high	.	.	duplicates(32)	.	.	.	.
MCF-7 (SRR534293)	duplicate	GCN1L1	MSI1	-/-	-/-	12:120628101	12:120789203	splice-site	splice-site	duplication	upstream	downstream	0	1	63	342	46	high	.	.	duplicates(25)	.	.	.	.
MCF-7 (SRR534293)	confirmed_by_structural_variant	BCAS3	SNTN(39526),AC136289.1(23747)	+/+	./+	17:58824640	3:63704222	splice-site	intergenic	translocation	downstream	upstream	28	18	19	356	151	high	.	.	duplicates(22),mismappers(2)	.	.	.	.
MCF-7 (SRR534293)	validated	RSBN1	AP4B1-AS1	-/-	+/+	1:114354332	1:114442494	splice-site	splice-site	inversion	upstream	upstream	19	18	26	258	257	high	.	.	duplicates(18)	.	.	.	.
MCF-7 (SRR534293)	duplicate	RSBN1	AP4B1-AS1	-/-	+/+	1:114354332	1:114440490	splice-site	splice-site	inversion	upstream	upstream	2	4	28	258	1895	high	.	.	duplicates(5)	.	.	.	.
MCF-7 (SRR534293)	validated	C16orf45	ABCC1	+/+	+/+	16:15528616	16:16170183	splice-site	splice-site	deletion	downstream	upstream	29	10	20	177	344	high	.	.	duplicates(19),mismatches(1)	.	.	.	.
MCF-7 (SRR534293)	duplicate	RP11-1021N1.1	ABCC1	+/+	+/+	16:15528616	16:16170183	splice-site	splice-site	deletion	downstream	upstream	29	10	20	177	344	high	.	.	duplicates(19),mismatches(1)	.	.	.	.
MCF-7 (SRR534293)	validated	PAPOLA	AK7	+/+	+/+	14:96968937	14:96904172	splice-site	splice-site	duplication	downstream	upstream	21	22	16	398	64	high	.	.	duplicates(17)	.	.	.	.
MCF-7 (SRR534293)	duplicate	PAPOLA	AK7	+/+	+/+	14:96971036	14:96904172	splice-site	splice-site	duplication	downstream	upstream	0	1	17	30	64	high	.	.	duplicates(1)	.	.	.	.
MCF-7 (SRR534293)	duplicate	PAPOLA	AK7	+/+	+/+	14:96968937	14:96909067	splice-site	splice-site	duplication	downstream	upstream	1	1	0	398	82	medium	.	.	duplicates(1)	.	.	.	.
MCF-7 (SRR534293)	validated	SMARCA4	CARM1	+/+	+/+	19:11097269	19:11015627	splice-site	splice-site	duplication	downstream	upstream	15	6	33	187	366	high	.	.	duplicates(13)	.	.	.	.
MCF-7 (SRR534293)	non-validated	CD180(18305),CTD-2187J20.1(52918)	RP11-434D9.1	./+	+/+	5:66510932	5:66915619	intergenic	splice-site	deletion	downstream	upstream	19	13	19	132	115	high	.	.	duplicates(19),mismappers(1)	.	.	.	.
MCF-7 (SRR534293)	validated	ATXN7L3	FAM171A2	-/-	-/-	17:42275388	17:42433956	splice-site	splice-site	duplication	upstream	downstream	1	40	8	258	108	high	.	.	duplicates(12)	.	.	.	.
MCF-7 (SRR534293)	validated	SULF2	PRICKLE2	-/-	-/-	20:46414087	3:64085601	splice-site	splice-site	translocation	upstream	downstream	0	18	30	351	324	high	.	.	duplicates(13)	.	.	.	.
MCF-7 (SRR534293)	duplicate	SULF2	PRICKLE2	-/-	-/-	20:46414792	3:64085601	splice-site	splice-site	translocation	upstream	downstream	2	20	6	2458	324	high	.	.	duplicates(15)	.	.	.	.
MCF-7 (SRR534293)	duplicate	SULF2	PRICKLE2	-/-	-/-	20:46414579	3:64085601	splice-site	splice-site	translocation	upstream	downstream	0	4	6	908	324	high	.	.	duplicates(7)	.	.	.	.
MCF-7 (SRR534293)	duplicate	SULF2	PRICKLE2	-/-	-/-	20:46411670	3:64102178	intron	intron	translocation	upstream	downstream	4	11	38	94	22	medium	.	.	duplicates(9),low_entropy(1)	.	.	.	.
MCF-7 (SRR534293)	confirmed_by_structural_variant	LEMD3	RP1-74B13.2	+/+	+/+	12:65612399	12:111283403	splice-site	splice-site	deletion	downstream	upstream	16	8	20	201	107	high	.	.	duplicates(15),mismappers(2)	.	.	.	.
MCF-7 (SRR534293)	confirmed_by_structural_variant	TTC6	RP11-356O9.1	+/+	+/+	14:38065213	14:38033424	splice-site	exon	duplication	downstream	upstream	6	14	23	288	171	high	.	.	duplicates(12),low_entropy(2)	.	.	.	.
MCF-7 (SRR534293)	duplicate	TTC6	RP11-356O9.1	+/+	+/+	14:38065213	14:38047909	splice-site	splice-site	duplication	downstream	upstream	0	1	1	288	89	low	.	.	low_entropy(1)	.	.	.	.
MCF-7 (SRR534293)	validated	B3GNTL1	SLC9A8	-/-	+/+	17:80914062	20:48494518	intron	splice-site	translocation	upstream	upstream	12	12	17	73	300	high	.	.	duplicates(15)	.	.	.	.
MCF-7 (SRR534293)	duplicate	B3GNTL1	SLC9A8	-/-	+/+	17:80914571	20:48494518	splice-site	splice-site	translocation	upstream	upstream	12	14	9	273	300	high	.	.	duplicates(15)	.	.	.	.
MCF-7 (SRR534293)	non-validated	SLC25A24	SARS	-/-	+/+	1:108724563	1:109777832	splice-site	splice-site	inversion	upstream	upstream	7	16	18	239	756	high	.	.	duplicates(12),inconsistently_clipped(1)	.	.	.	.
MCF-7 (SRR534293)	validated	AC099850.1	VMP1	+/+	+/+	17:57184952	17:57915656	splice-site	splice-site	deletion	downstream	upstream	14	11	16	976	50574	high	.	.	duplicates(9),mismatches(1)	.	.	.	.
MCF-7 (SRR534293)	duplicate	AC099850.1	VMP1	+/+	+/+	17:57184952	17:57911373	splice-site	splice-site	deletion	downstream	upstream	6	0	19	976	572	high	.	.	duplicates(20),mismappers(50)	.	.	.	.
MCF-7 (SRR534293)	confirmed_by_structural_variant	TOP1	RNA5SP484(163361),RNU2-52P(6615)	+/+	./+	20:39706277	20:39646230	splice-site	intergenic	duplication	downstream	upstream	14	18	6	196	54	high	.	.	duplicates(14)	.	.	.	.
MCF-7 (SRR534293)	validated	RPS6KB1	VMP1	+/+	+/+	17:57992064	17:57917129	splice-site	splice-site	duplication	downstream	upstream	8	21	9	1132	53417	high	.	.	duplicates(8)	.	.	.	.
MCF-7 (SRR534293)	duplicate	RPS6KB1	VMP1	+/+	+/+	17:57987972	17:57915656	splice-site	splice-site	duplication	downstream	upstream	8	12	10	2848	50574	high	.	.	duplicates(11)	.	.	.	.
MCF-7 (SRR534293)	duplicate	RPS6KB1	VMP1	+/+	+/+	17:57990165	17:57917129	splice-site	splice-site	duplication	downstream	upstream	0	1	0	1990	53417	medium	.	.	.	.	.	.	.
MCF-7 (SRR534293)	confirmed_by_structural_variant	TPD52L2	SLMO2P3(48054),RP11-180P8.1(45703)	+/+	./+	20:62500794	17:60967060	splice-site	intergenic	translocation	downstream	upstream	23	2	11	1280	98	high	.	.	duplicates(1)	.	.	.	.
MCF-7 (SRR534293)	non-validated	RP5-947P14.1(173599),RP11-478L17.1(286244)	BCAS1	./+	-/-	1:106800720	20:52612589	intergenic	splice-site	translocation	downstream	downstream	5	17	8	215	401	high	.	.	duplicates(7),mismappers(2)	.	.	.	.
MCF-7 (SRR534293)	confirmed_by_structural_variant	UNK	ABCA5(1526),SNORA40(26363)	+/+	./-	17:73816189	17:67324911	splice-site	intergenic	inversion	downstream	downstream	13	10	7	561	137	high	.	.	duplicates(9)	.	.	.	.
MCF-7 (SRR534293)	non-validated	PBX3	UCK1(6360),RAPGEF1(39142)	+/+	./-	9:128510902	9:134413015	splice-site	intergenic	inversion	downstream	downstream	26	1	1	515	232	high	.	.	duplicates(28),low_entropy(3),mismappers(82)	.	.	.	.
MCF-7 (SRR534293)	validated	SYTL2	PICALM	-/-	-/-	11:85468668	11:85685855	splice-site	splice-site	duplication	upstream	downstream	13	8	5	1633	1623	high	.	.	duplicates(4)	.	.	.	.
MCF-7 (SRR534293)	confirmed_by_structural_variant	RSBN1	VAV3	-/-	-/+	1:114354332	1:108212323	splice-site	intron	inversion/5'-5'	upstream	upstream	4	12	8	258	52	high	.	.	duplicates(7),low_entropy(1)	.	.	.	.
MCF-7 (SRR534293)	validated	TBL1XR1	RGS17	-/-	-/-	3:176914909	6:153365178	splice-site	splice-site	translocation	upstream	downstream	1	19	4	85	191	high	.	.	duplicates(8)	.	.	.	.
MCF-7 (SRR534293)	duplicate	TBL1XR1	RGS17	-/-	-/-	3:176878659	6:153365178	splice-site	splice-site	translocation	upstream	downstream	0	2	5	43	191	high	.	.	duplicates(2)	.	.	.	.
MCF-7 (SRR534293)	validated	GATAD2B	NUP210L	-/-	-/-	1:153895209	1:154002530	splice-site	splice-site	duplication	upstream	downstream	0	11	13	78	19	high	.	.	duplicates(4)	.	.	.	.
MCF-7 (SRR534293)	duplicate	GATAD2B	NUP210L	-/-	-/-	1:153895209	1:154000073	splice-site	splice-site	duplication	upstream	downstream	0	6	8	78	87	high	.	.	duplicates(4)	.	.	.	.
MCF-7 (SRR534293)	validated	TAF4	BRIP1	-/-	-/-	20:60639507	17:59926617	splice-site	splice-site	translocation	upstream	downstream	4	6	13	478	876	high	.	.	duplicates(7)	.	.	.	.
MCF-7 (SRR534293)	duplicate	TAF4	BRIP1	-/-	-/-	20:60639507	17:59924581	splice-site	splice-site	translocation	upstream	downstream	0	3	4	478	1108	high	.	.	duplicates(2)	.	.	.	.
MCF-7 (SRR534293)	validated	TEX14	PTPRG	-/-	+/+	17:56636814	3:61608137	splice-site	intron	translocation	upstream	upstream	6	13	3	66	56	high	.	.	duplicates(5)	.	.	.	.
MCF-7 (SRR534293)	duplicate	TEX14	PTPRG	-/-	+/+	17:56636814	3:61734552	splice-site	splice-site	translocation	upstream	upstream	1	0	1	66	28	low	.	.	duplicates(1)	.	.	.	.
MCF-7 (SRR534293)	validated	MYO6	SENP6	+/+	+/+	6:76459140	6:76388299	splice-site	splice-site	duplication	downstream	upstream	6	7	9	107	457	high	.	.	duplicates(9),low_entropy(1)	.	.	.	.
MCF-7 (SRR534293)	non-validated	RAP1A	AL354984.3(23265),AL354984.2(68098)	+/+	./-	1:112162556	20:56574414	splice-site	intergenic	translocation	downstream	downstream	1	1	19	80	36	high	.	.	duplicates(4),homopolymer(4),low_entropy(1)	.	.	.	.
MCF-7 (SRR534293)	confirmed_by_structural_variant	PDE8A	SCAND2P	+/+	+/+	15:85525579	15:85180578	splice-site	splice-site	duplication	downstream	upstream	2	5	14	175	128	high	.	.	duplicates(2)	.	.	.	.
MCF-7 (SRR534293)	duplicate	PDE8A	SCAND2P	+/+	+/+	15:85525579	15:85179083	splice-site	splice-site	duplication	downstream	upstream	1	1	14	175	64	high	.	.	duplicates(1)	.	.	.	.
MCF-7 (SRR534293)	duplicate	PDE8A	SCAND2P	+/+	+/+	15:85527687	15:85178655	intron	intron	duplication	downstream	upstream	0	0	14	12	22	medium	.	.	duplicates(1),mismappers(10)	.	.	.	.
MCF-7 (SRR534293)	validated	PNPLA7	DPH7	-/-	-/-	9:140409831	9:140450100	splice-site	splice-site	duplication	upstream	downstream	6	7	8	101	2667	high	.	.	duplicates(7),low_entropy(1)	.	.	.	.
MCF-7 (SRR534293)	validated	BCAS3	ATXN7	+/+	+/+	17:58824640	3:63981181	splice-site	splice-site	translocation	downstream	upstream	5	2	13	356	443	high	.	.	duplicates(8),mismatches(1)	.	.	.	.
MCF-7 (SRR534293)	non-validated	BCAS1	RP11-347D21.3(118443),SNORD36(28755)	-/-	./-	20:52686972	20:46735931	splice-site	intergenic	deletion	upstream	downstream	3	6	10	359	20	high	.	.	duplicates(8)	.	.	.	.
MCF-7 (SRR534293)	non-validated	TANC2	TLK2(939),MRC2(10981)	+/+	./+	17:61151375	17:60693781	splice-site	intergenic	duplication	downstream	upstream	8	6	5	1283	69	high	.	.	duplicates(8)	.	.	.	.
MCF-7 (SRR534293)	non-validated	NCOA3	ZNF217	+/+	-/+	20:46266527	20:52224820	splice-site	intron	deletion/5'-5'	downstream	upstream	15	2	2	1834	60	high	.	.	duplicates(7)	.	.	.	.
MCF-7 (SRR534293)	validated	PLCG1	TOP1	+/+	+/+	20:39766498	20:39729849	splice-site	splice-site	duplication	downstream	upstream	3	9	7	2571	460	high	.	.	duplicates(10)	.	.	.	.
MCF-7 (SRR534293)	duplicate	PLCG1	TOP1	+/+	+/+	20:39765675	20:39729849	splice-site	splice-site	duplication	downstream	upstream	0	3	0	311	460	medium	.	.	.	.	.	.	.
MCF-7 (SRR534293)	duplicate	PLCG1	TOP1	+/+	+/+	20:39766498	20:39741422	splice-site	splice-site	duplication	downstream	upstream	1	0	0	2571	838	medium	.	.	.	.	.	.	.
MCF-7 (SRR534293)	duplicate	PLCG1	TOP1	+/+	+/+	20:39765675	20:39741422	splice-site	splice-site	duplication	downstream	upstream	0	1	0	311	838	medium	.	.	duplicates(1)	.	.	.	.
MCF-7 (SRR534293)	confirmed_by_structural_variant	ZBTB38(4739),KRT18P35(16103)	IFT122	./-	+/+	3:141173373	3:129231155	intergenic	splice-site	inversion	upstream	upstream	6	5	7	145	1327	high	.	.	duplicates(5)	.	.	.	.
MCF-7 (SRR534293)	duplicate	PBX3	UCK1	+/+	-/-	9:128510902	9:134413015	splice-site	5'UTR	inversion	downstream	downstream	0	9	9	515	232	high	.	.	duplicates(6),mismappers(3)	.	.	.	.
MCF-7 (SRR534293)	non-validated	HIPK1	DENND2C	+/+	-/-	1:114484081	1:115161103	splice-site	splice-site	inversion	downstream	downstream	8	4	5	336	30	high	.	.	duplicates(8),mismappers(1)	.	.	.	.
MCF-7 (SRR534293)	validated	TXLNG	SYAP1	+/+	+/+	X:16804712	X:16753350	splice-site	splice-site	duplication	downstream	upstream	1	4	11	106	119	high	.	.	duplicates(4)	.	.	.	.
MCF-7 (SRR534293)	validated	ESR1	CCDC170	+/+	+/+	6:152023140	6:151894309	splice-site	splice-site	duplication	downstream	upstream	4	12	0	54	180	high	.	.	duplicates(2)	.	.	.	.
MCF-7 (SRR534293)	non-validated	AGFG1	TM4SF20(10183),MIR5703(79954)	+/+	./+	2:228389631	2:228256894	splice-site	intergenic	duplication	downstream	upstream	14	1	0	171	149	high	.	.	duplicates(14),low_entropy(1),mismappers(47)	.	.	.	.
MCF-7 (SRR534293)	confirmed_by_structural_variant	ATP9A	RP11-347D21.1	-/-	+/+	20:50255882	20:46580501	splice-site	splice-site	inversion	upstream	upstream	1	2	12	549	196	high	.	.	duplicates(3)	.	.	.	.
MCF-7 (SRR534293)	non-validated	PSMD6-AS2	PRICKLE2	+/-	-/-	3:63995783	3:64085601	intron	splice-site	duplication/3'-3'	upstream	downstream	2	10	3	109	324	high	.	.	.	.	.	.	.
MCF-7 (SRR534293)	validated	RAD51C	ATXN7	+/+	+/+	17:56801461	3:63965591	splice-site	splice-site	translocation	downstream	upstream	3	6	6	837	114	high	.	.	duplicates(5)	.	.	.	.
MCF-7 (SRR534293)	duplicate	RAD51C	ATXN7	+/+	+/+	17:56798173	3:63965591	splice-site	splice-site	translocation	downstream	upstream	1	1	1	942	114	medium	.	.	.	.	.	.	.
MCF-7 (SRR534293)	non-validated	TTLL4	PLCD4	+/+	+/+	2:219614869	2:219480430	splice-site	splice-site	duplication	downstream	upstream	1	2	11	261	22	high	.	.	duplicates(5),low_entropy(1)	.	.	.	.
MCF-7 (SRR534293)	duplicate	NCOA3	AC005808.3	+/+	+/+	20:46266527	20:52224820	splice-site	5'UTR	deletion	downstream	upstream	3	7	4	1834	60	high	.	.	duplicates(4)	.	.	.	.
MCF-7 (SRR534293)	duplicate	NCOA3	AC005808.3	+/+	+/+	20:46266527	20:52234376	splice-site	splice-site	deletion	downstream	upstream	0	2	2	1834	10	medium	.	.	.	.	.	.	.
MCF-7 (SRR534293)	duplicate	NCOA3	AC005808.3	+/+	+/+	20:46266527	20:52251069	splice-site	splice-site	deletion	downstream	upstream	1	0	0	1834	8	medium	.	.	.	.	.	.	.
MCF-7 (SRR534293)	non-validated	LRRC42	WDHD1	+/-	-/-	1:54419958	14:55408408	intron	splice-site	translocation/3'-3'	upstream	downstream	6	5	2	107	261	high	.	.	duplicates(5)	.	.	.	.
MCF-7 (SRR534293)	duplicate	WDHD1	LRRC42	-/-	+/-	14:55411050	1:54420493	splice-site	intron	translocation/5'-5'	upstream	downstream	4	1	1	203	169	high	.	.	duplicates(5)	.	.	.	.
MCF-7 (SRR534293)	non-validated	BMP7	PSMD6(39505),RP11-129B22.1(4477)	-/-	./+	20:55840761	3:64049163	splice-site	intergenic	translocation	upstream	upstream	4	7	2	609	109	high	.	.	duplicates(4),low_entropy(1),mismatches(1)	.	.	.	.
MCF-7 (SRR534293)	validated	POP1	MATN2	+/+	+/+	8:99129618	8:99042690	splice-site	splice-site	duplication	downstream	upstream	0	13	0	59	214	high	.	.	duplicates(8),low_entropy(3)	.	.	.	.
MCF-7 (SRR534293)	duplicate	POP1	MATN2	+/+	+/+	8:99129558	8:99042690	splice-site	splice-site	duplication	downstream	upstream	0	1	0	9	214	medium	.	.	.	.	.	.	.
MCF-7 (SRR534293)	non-validated	BCAS3	REG4	+/+	-/-	17:59445855	1:120337308	splice-site	splice-site	translocation	downstream	downstream	6	5	2	1434	13	high	.	.	duplicates(6)	.	.	.	.
MCF-7 (SRR534293)	non-validated	RBM6	BCAR1	+/+	-/-	3:50036946	16:75276988	splice-site	splice-site	translocation	downstream	downstream	1	5	6	1289	461	high	.	.	duplicates(4)	.	.	.	.
MCF-7 (SRR534293)	duplicate	RBM6	BCAR1	+/+	-/-	3:50000118	16:75276988	splice-site	splice-site	translocation	downstream	downstream	1	0	1	1197	461	medium	.	.	.	.	.	.	.
MCF-7 (SRR534293)	non-validated	SPTLC1	RP11-27K13.3	-/-	-/-	9:94842298	1:117592956	splice-site	splice-site	translocation	upstream	downstream	6	1	4	343	29	high	.	.	duplicates(3)	.	.	.	.
MCF-7 (SRR534293)	duplicate	SPTLC1	RP11-27K13.3	-/-	-/-	9:94842298	1:117574958	splice-site	splice-site	translocation	upstream	downstream	5	1	3	343	19	high	.	.	duplicates(1)	.	.	.	.
MCF-7 (SRR534293)	duplicate	SPTLC1	RP11-27K13.3	-/-	-/-	9:94841716	1:117592956	splice-site	splice-site	translocation	upstream	downstream	0	1	4	48	29	high	.	.	.	.	.	.	.
MCF-7 (SRR534293)	non-validated	TPD52L2	TANC2	+/+	+/+	20:62500794	17:61086898	splice-site	5'UTR	translocation	downstream	upstream	5	2	4	1280	1879	high	.	.	duplicates(1)	.	.	.	.
MCF-7 (SRR534293)	non-validated	PARD6B	CADPS(23740),RP11-24H1.1(27252)	+/+	./-	20:49348389	3:62884794	splice-site	intergenic	translocation	downstream	downstream	4	6	1	1432	115	high	.	.	duplicates(1),mismappers(2)	.	.	.	.
MCF-7 (SRR534293)	non-validated	USP32	APPBP2	-/-	-/-	17:58376695	17:58538148	intron	splice-site	duplication	upstream	downstream	3	6	2	63	1569	high	.	.	duplicates(2)	.	.	.	.
MCF-7 (SRR534293)	duplicate	USP32	APPBP2	-/-	-/-	17:58342773	17:58577848	splice-site	splice-site	duplication	upstream	downstream	0	1	2	690	1352	medium	.	.	.	.	.	.	.
MCF-7 (SRR534293)	duplicate	USP32	APPBP2	-/-	-/-	17:58378960	17:58538148	splice-site	splice-site	duplication	upstream	downstream	1	1	0	536	1569	medium	.	.	.	.	.	.	.
MCF-7 (SRR534293)	non-validated	HOOK3	RP13-359K18.1(187175),RNU6-472P(17982)	+/+	./-	8:42761401	12:34058327	splice-site	intergenic	translocation	downstream	downstream	4	4	2	83	16	high	.	.	duplicates(4)	.	.	.	.
MCF-7 (SRR534293)	validated	DEPDC1B	ELOVL7	-/-	-/-	5:59934577	5:60053472	splice-site	splice-site	duplication	upstream	downstream	5	5	0	81	130	high	.	.	duplicates(2)	.	.	.	.
MCF-7 (SRR534293)	non-validated	MYH9	CTD-2081K17.2(70611),UQCRFS1(122700)	-/-	./-	22:36710190	19:29575473	splice-site	intergenic	translocation	upstream	downstream	6	1	3	228	43	high	.	.	duplicates(2)	.	.	.	.
MCF-7 (SRR534293)	validated	AHCYL1	RAD51C	+/+	+/+	1:110527794	17:56811479	splice-site	splice-site	translocation	downstream	upstream	4	2	4	312	1165	high	.	.	duplicates(4),low_entropy(2)	.	.	.	.
MCF-7 (SRR534293)	duplicate	AHCYL1	RAD51C	+/+	+/+	1:110547073	17:56811479	splice-site	splice-site	translocation	downstream	upstream	1	0	8	61	1165	high	.	.	duplicates(3)	.	.	.	.
MCF-7 (SRR534293)	duplicate	AHCYL1	RAD51C	+/+	+/+	1:110547809	17:56810938	intron	intron	translocation	downstream	upstream	12	21	13	42	135	medium	.	.	duplicates(11),mismappers(4),mismatches(1)	.	.	.	.
MCF-7 (SRR534293)	non-validated	UBXN4	R3HDM1	+/+	+/+	2:136530117	2:136432902	splice-site	splice-site	duplication	downstream	upstream	9	1	0	1399	173	high	.	.	duplicates(2)	.	.	.	.
MCF-7 (SRR534293)	non-validated	TRIM37	TBC1D3P1-DHX40P1	-/-	-/-	17:57161363	17:58066705	splice-site	splice-site	duplication	upstream	downstream	4	4	2	2582	28	high	.	.	duplicates(5),low_entropy(2)	.	.	.	.
MCF-7 (SRR534293)	duplicate	TRIM37	TBC1D3P1-DHX40P1	-/-	-/-	17:57165652	17:58064965	splice-site	splice-site	duplication	upstream	downstream	0	1	1	2522	30	medium	.	.	.	.	.	.	.
MCF-7 (SRR534293)	duplicate	TRIM37	TBC1D3P1-DHX40P1	-/-	-/-	17:57165652	17:58054131	splice-site	splice-site	duplication	upstream	downstream	0	1	1	2522	35	medium	.	.	.	.	.	.	.
MCF-7 (SRR534293)	duplicate	TRIM37	TBC1D3P1-DHX40P1	-/-	-/-	17:57165652	17:58066705	splice-site	splice-site	duplication	upstream	downstream	0	1	1	2522	28	medium	.	.	low_entropy(1)	.	.	.	.
MCF-7 (SRR534293)	duplicate	TRIM37	DHX40P1	-/-	-/-	17:57161363	17:58066705	splice-site	splice-site	duplication	upstream	downstream	4	4	2	2582	28	high	.	.	duplicates(5),low_entropy(2)	.	.	.	.
MCF-7 (SRR534293)	duplicate	TRIM37	DHX40P1	-/-	-/-	17:57165652	17:58064965	splice-site	splice-site	duplication	upstream	downstream	0	1	1	2522	30	medium	.	.	.	.	.	.	.
MCF-7 (SRR534293)	duplicate	TRIM37	DHX40P1	-/-	-/-	17:57165652	17:58066705	splice-site	splice-site	duplication	upstream	downstream	0	1	1	2522	28	medium	.	.	low_entropy(1)	.	.	.	.
MCF-7 (SRR534293)	duplicate	TRIM37	DHX40P1	-/-	-/-	17:57165652	17:58054131	splice-site	splice-site	duplication	upstream	downstream	0	1	1	2522	35	medium	.	.	.	.	.	.	.
MCF-7 (SRR534293)	confirmed_by_structural_variant	SLC25A19	RN7SL603P(52090),ZFP64(58740)	-/-	./-	17:73279504	20:50609462	splice-site	intergenic	translocation	upstream	downstream	4	1	4	354	28	high	.	.	duplicates(3),mismappers(1)	.	.	.	.
MCF-7 (SRR534293)	validated	RP11-129B22.1	SULF2	+/+	-/+	3:64080867	20:46415149	splice-site	5'UTR	translocation/5'-5'	downstream	upstream	3	1	5	279	3884	high	.	.	duplicates(1)	.	.	.	.
MCF-7 (SRR534293)	confirmed_by_structural_variant	RNU6-472P(23559),Y_RNA(35426)	SLC16A7	./-	+/+	12:34099974	12:60098553	intergenic	splice-site	inversion	upstream	upstream	1	2	5	6	16	high	.	.	.	.	.	.	.
MCF-7 (SRR534293)	validated	NAV1	GPR37L1	+/+	+/+	1:201687883	1:202096869	splice-site	splice-site	deletion	downstream	upstream	3	0	5	50	405	high	.	.	duplicates(3)	.	.	.	.
MCF-7 (SRR534293)	duplicate	NAV1	GPR37L1	+/+	+/+	1:201709204	1:202096869	splice-site	splice-site	deletion/read-through	downstream	upstream	5	4	15	87	405	medium	.	.	duplicates(7)	.	.	.	.
MCF-7 (SRR534293)	duplicate	NAV1	GPR37L1	+/+	+/+	1:201708972	1:202096869	splice-site	splice-site	deletion/read-through	downstream	upstream	1	0	5	28	405	medium	.	.	duplicates(3)	.	.	.	.
MCF-7 (SRR534293)	validated	USP31	CRYL1	-/-	-/-	16:23159959	13:21013893	splice-site	splice-site	translocation	upstream	downstream	4	2	2	61	108	high	.	.	duplicates(5)	.	.	.	.
MCF-7 (SRR534293)	duplicate	USP31	CRYL1	-/-	-/-	16:23159959	13:21006435	splice-site	splice-site	translocation	upstream	downstream	3	0	1	61	161	high	.	.	duplicates(1)	.	.	.	.
MCF-7 (SRR534293)	non-validated	AFF4	HSPA4	-/-	+/-	5:132227856	5:132427013	splice-site	CDS	duplication/5'-5'	upstream	downstream	3	2	3	106	439	high	.	.	duplicates(3)	.	.	.	.
MCF-7 (SRR534293)	validated	VAV3	RP5-1073O3.2	-/-	+/+	1:108138834	1:114357009	splice-site	splice-site	inversion	upstream	upstream	0	5	3	262	30	high	.	.	duplicates(2)	.	.	.	.
MCF-7 (SRR534293)	non-validated	GBF1	MACROD2	+/+	+/+	10:104019873	20:14665489	splice-site	splice-site	translocation	downstream	upstream	2	3	3	158	22	high	.	.	duplicates(1)	.	.	.	.
MCF-7 (SRR534293)	confirmed_by_structural_variant	ARRB1	KLHL35	-/-	-/-	11:75010746	11:75136626	intron	splice-site	duplication	upstream	downstream	1	0	7	49	393	high	.	.	duplicates(2)	.	.	.	.
MCF-7 (SRR534293)	duplicate	ARRB1	KLHL35	-/-	-/-	11:75014643	11:75136626	splice-site	splice-site	duplication	upstream	downstream	3	0	5	46	393	high	.	.	duplicates(2)	.	.	.	.
MCF-7 (SRR534293)	duplicate	ARRB1	KLHL35	-/-	-/-	11:75062632	11:75134924	splice-site	splice-site	duplication	upstream	downstream	0	1	2	146	307	medium	.	.	.	.	.	.	.
MCF-7 (SRR534293)	validated	VAV3	AP4B1-AS1	-/-	+/+	1:108138834	1:114442494	splice-site	splice-site	inversion	upstream	upstream	2	5	1	262	257	high	.	.	duplicates(1)	.	.	.	.
MCF-7 (SRR534293)	non-validated	BMP7	SULF2	-/-	-/+	20:55840761	20:46415149	splice-site	5'UTR	inversion/5'-5'	upstream	upstream	1	3	4	609	3884	high	.	.	duplicates(2)	.	.	.	.
MCF-7 (SRR534293)	confirmed_by_structural_variant	DHX30	EMCN	+/+	-/+	3:47859607	4:101342411	splice-site	intron	translocation/5'-5'	downstream	upstream	3	2	2	173	96	high	.	.	duplicates(1)	.	.	.	.
MCF-7 (SRR534293)	non-validated	RP11-15E18.1	LPPR5	+/+	-/-	17:58603862	1:99470179	splice-site	CDS	translocation	downstream	downstream	1	3	3	793	5	high	.	.	duplicates(1)	.	.	.	.
MCF-7 (SRR534293)	non-validated	MAN1A2	CBLN4(24390),RNA5SP487(175190)	+/+	./-	1:117911107	20:54604918	splice-site	intergenic	translocation	downstream	downstream	0	4	2	59	11	high	.	.	duplicates(2)	.	.	.	.
MCF-7 (SRR534293)	non-validated	USP32	PPM1D	-/-	+/-	17:58342773	17:58679979	splice-site	intron	duplication/5'-5'	upstream	downstream	5	1	0	690	61	high	.	.	duplicates(2),mismappers(14)	.	.	.	.
MCF-7 (SRR534293)	non-validated	ATP1A1	RP11-323A7.1(166064),RP11-470F18.1(10613)	+/+	./+	1:116939356	9:78183972	splice-site	intergenic	translocation	downstream	upstream	2	4	0	1975	9	high	.	.	.	.	.	.	.
MCF-7 (SRR534293)	non-validated	EIF3H	RAD21	-/-	-/-	8:117738255	8:117879000	splice-site	splice-site	duplication	upstream	downstream	4	0	2	479	138	high	.	.	duplicates(2)	.	.	.	.
MCF-7 (SRR534293)	validated	UBE2V1	TBX2	-/-	+/+	20:48732022	17:59479045	splice-site	splice-site	translocation	upstream	upstream	2	2	2	38	6864	high	.	.	duplicates(1)	.	.	.	.
MCF-7 (SRR534293)	duplicate	UBE2V1	TBX2	-/-	+/+	20:48729644	17:59479045	splice-site	splice-site	translocation	upstream	upstream	0	1	2	748	6864	medium	.	.	duplicates(1)	.	.	.	.
MCF-7 (SRR534293)	duplicate	UBE2V1	TBX2	-/-	+/+	20:48729644	17:59481782	splice-site	splice-site	translocation	upstream	upstream	0	1	0	748	11536	medium	.	.	duplicates(3)	.	.	.	.
MCF-7 (SRR534293)	non-validated	FNIP1	ACSL6	-/-	-/-	5:131080257	5:131154556	splice-site	splice-site	duplication	upstream	downstream	4	1	1	59	3	high	.	.	duplicates(2),low_entropy(1)	.	.	.	.
MCF-7 (SRR534293)	duplicate	FNIP1	AC034228.7	-/-	-/-	5:131080257	5:131154556	splice-site	splice-site	duplication	upstream	downstream	4	1	1	59	3	high	.	.	duplicates(2),low_entropy(1)	.	.	.	.
MCF-7 (SRR534293)	validated	ATP1A1	ZFP64	+/+	-/-	1:116939356	20:50668671	splice-site	splice-site	translocation	downstream	downstream	3	0	2	1975	61	high	.	.	duplicates(5),mismappers(7)	.	.	.	.
MCF-7 (SRR534293)	duplicate	ATP1A1	ZFP64	+/+	-/-	1:116939622	20:50680236	intron	intron	translocation	downstream	downstream	10	8	12	39	26	medium	.	.	duplicates(10),mismappers(8)	.	.	.	.
MCF-7 (SRR534293)	non-validated	GIGYF2	EIF4E2	+/+	+/+	2:233568199	2:233445614	splice-site	splice-site	duplication	downstream	upstream	2	3	0	75	103	high	.	.	duplicates(2)	.	.	.	.
MCF-7 (SRR534293)	duplicate	GIGYF2	EIF4E2	+/+	+/+	2:233562102	2:233445614	splice-site	splice-site	duplication	downstream	upstream	0	1	0	75	103	medium	.	.	duplicates(1)	.	.	.	.
MCF-7 (SRR534293)	non-validated	NPEPPS	EFCAB13	+/+	+/+	17:45682918	17:45490139	splice-site	splice-site	duplication	downstream	upstream	1	2	2	646	19	high	.	.	duplicates(1),low_entropy(1)	.	.	.	.
MCF-7 (SRR534293)	validated	SLC25A24	NBPF6	-/-	+/+	1:108703804	1:109013219	splice-site	splice-site	inversion	upstream	upstream	2	0	2	469	95	high	.	.	duplicates(2),mismappers(5)	.	.	.	.
MCF-7 (SRR534293)	non-validated	ANO6	RP11-267D19.1(30538),AC026357.1(17433)	+/+	./-	12:45725206	12:33177226	splice-site	intergenic	inversion	downstream	downstream	1	2	1	73	27	high	.	.	.	.	.	.	.
MCF-7 (SRR534293)	non-validated	ABCA1	KIAA1324	-/-	+/+	9:107620803	1:109737043	splice-site	splice-site	translocation	upstream	upstream	1	1	2	18	459	high	.	.	duplicates(4)	.	.	.	.
MCF-7 (SRR534293)	non-validated	NINJ1	DENND1A	-/-	-/+	9:95896425	9:126266904	splice-site	intron	inversion/5'-5'	upstream	upstream	0	1	3	119	13	high	.	.	.	.	.	.	.
MCF-7 (SRR534293)	confirmed_by_structural_variant	ZNF217	RP4-813D12.3	-/-	+/-	20:52192266	20:55851176	splice-site	intron	duplication/5'-5'	upstream	downstream	2	2	0	901	14	high	.	.	duplicates(2)	.	.	.	.
MCF-7 (SRR534293)	validated	KCND3	PPM1E	-/-	+/+	1:112524243	17:57043055	splice-site	splice-site	translocation	upstream	upstream	1	1	2	39	40	high	.	.	.	.	.	.	.
MCF-7 (SRR534293)	duplicate	KCND3	PPM1E	-/-	+/+	1:112524243	17:57046900	splice-site	splice-site	translocation	upstream	upstream	0	3	0	39	68	medium	.	.	duplicates(3)	.	.	.	.
MCF-7 (SRR534293)	duplicate	KCND3	PPM1E	-/-	+/+	1:112524243	17:57049493	splice-site	splice-site	translocation	upstream	upstream	1	0	0	39	42	medium	.	.	.	.	.	.	.
MCF-7 (SRR534293)	confirmed_by_structural_variant	RSBN1	DCLRE1B	-/-	+/+	1:114354332	1:114448091	splice-site	5'UTR	inversion	upstream	upstream	1	2	1	258	297	high	.	.	.	.	.	.	.
MCF-7 (SRR534293)	confirmed_by_structural_variant	ATP9A	RP11-347D21.3(21864),SNORD36(125334)	-/-	./+	20:50255882	20:46639352	splice-site	intergenic	inversion	upstream	upstream	0	3	1	549	41	high	.	.	duplicates(1)	.	.	.	.
MCF-7 (SRR534293)	non-validated	HGSNAT	RP11-643N23.1(253494),AC113134.1(3388954)	+/+	./+	8:43052168	8:43783228	splice-site	intergenic	deletion	downstream	upstream	1	0	2	139	7	high	.	.	duplicates(1),mismappers(4)	.	.	.	.
MCF-7 (SRR534293)	confirmed_by_structural_variant	SMARCC1	EMCN	-/-	-/-	3:47779519	4:101505123	splice-site	splice-site	translocation	upstream	downstream	1	0	2	124	13	high	.	.	duplicates(2),mismappers(7)	.	.	.	.
MCF-7 (SRR534293)	duplicate	SMARCC1	EMCN	-/-	-/-	3:47779519	4:101491482	splice-site	splice-site	translocation	upstream	downstream	0	1	1	124	25	high	.	.	mismappers(9)	.	.	.	.
MCF-7 (SRR534293)	duplicate	SMARCC1	EMCN	-/-	-/-	3:47787398	4:101491482	splice-site	splice-site	translocation	upstream	downstream	0	0	0	73	25	medium	.	.	duplicates(1),mismappers(1)	.	.	.	.
MCF-7 (SRR534293)	confirmed_by_structural_variant	ARHGAP10	RP11-752L20.1(6010),EDNRA(15586)	+/+	./+	4:148944564	4:148386483	splice-site	intergenic	duplication	downstream	upstream	2	1	0	78	13	high	.	.	duplicates(1)	.	.	.	.
MCF-7 (SRR534293)	non-validated	HTT	RP11-401I19.1	+/+	-/-	4:3138053	4:131806794	splice-site	exon	inversion	downstream	downstream	1	1	1	65	6	high	.	.	duplicates(1)	.	.	.	.
MCF-7 (SRR534293)	non-validated	PSMD6(8515),RP11-129B22.1(35467)	BCAS1	./+	-/-	3:64018173	20:52612589	intergenic	splice-site	translocation	downstream	downstream	0	1	2	3	401	high	.	.	duplicates(1)	.	.	.	.
MCF-7 (SRR534293)	confirmed_by_structural_variant	TPD52L2	RP11-453A12.1	+/+	+/+	20:62500794	17:60890322	splice-site	intron	translocation	downstream	upstream	1	0	2	1280	196	high	.	.	mismappers(3)	.	.	.	.
MCF-7 (SRR534293)	confirmed_by_structural_variant	UNK	ABCA5	+/+	-/-	17:73816189	17:67324601	splice-site	5'UTR	inversion	downstream	downstream	0	2	1	561	151	high	.	.	duplicates(1),mismappers(1)	.	.	.	.
MCF-7 (SRR534293)	non-validated	UBE2E2	RP11-20B7.1	+/+	+/+	3:23258803	3:73918927	splice-site	splice-site	deletion	downstream	upstream	0	2	1	22	13	high	.	.	.	.	.	.	.
MCF-7 (SRR534293)	duplicate	UBE2E2	RP11-20B7.1	+/+	+/+	3:23507536	3:73871163	intron	intron	deletion	downstream	upstream	1	0	3	3	2	medium	.	.	.	.	.	.	.
MCF-7 (SRR534293)	non-validated	RSRC1	OTOL1(96477),RP11-774I5.1(216490)	+/+	./+	3:158015866	3:161318207	splice-site	intergenic	deletion	downstream	upstream	0	1	2	43	18	high	.	.	duplicates(4)	.	.	.	.
MCF-7 (SRR534293)	confirmed_by_structural_variant	LEMD3	CCDC63	+/+	+/+	12:65612399	12:111290251	splice-site	intron	deletion	downstream	upstream	0	1	1	201	104	high	.	.	mismappers(3)	.	.	.	.
MCF-7 (SRR534293)	duplicate	LEMD3	CCDC63	+/+	+/+	12:65612399	12:111311646	splice-site	splice-site	deletion	downstream	upstream	1	1	0	201	180	low	.	.	.	.	.	.	.
MCF-7 (SRR534293)	non-validated	RSRC1	OTOL1(175755),RP11-774I5.1(137212)	+/+	./+	3:158015864	3:161397485	splice-site	intergenic	deletion	downstream	upstream	0	1	1	43	7	high	.	.	duplicates(1),mismappers(1)	.	.	.	.
MCF-7 (SRR534293)	confirmed_by_structural_variant	MTG2	NFATC2(6625),ATP9A(27058)	+/-	./+	20:60776853	20:50185995	3'UTR	intergenic	inversion	upstream	upstream	25	20	80	459	149	medium	.	.	duplicates(44),inconsistently_clipped(1)	.	.	.	.
MCF-7 (SRR534293)	confirmed_by_structural_variant	SS18L1	MTG2(7588),HRH3(3814)	+/+	./-	20:60744362	20:60786212	intron	intergenic	inversion	downstream	downstream	35	10	21	254	56	medium	.	.	duplicates(22)	.	.	.	.
MCF-7 (SRR534293)	validated	MTAP	CDKN2B-AS1	+/+	+/+	9:21818201	9:22092307	splice-site	splice-site	deletion/read-through	downstream	upstream	12	11	38	392	59	medium	.	.	duplicates(14)	.	.	.	.
MCF-7 (SRR534293)	duplicate	MTAP	CDKN2B-AS1	+/+	+/+	9:21818201	9:22087143	splice-site	intron	deletion/read-through	downstream	upstream	10	10	41	392	121	medium	.	.	duplicates(16),inconsistently_clipped(1)	.	.	.	.
MCF-7 (SRR534293)	duplicate	MTAP	CDKN2B-AS1	+/+	+/+	9:21818201	9:22096371	splice-site	splice-site	deletion/read-through	downstream	upstream	10	19	25	392	170	medium	.	.	duplicates(17)	.	.	.	.
MCF-7 (SRR534293)	duplicate	MTAP	CDKN2B-AS1	+/+	+/+	9:21818201	9:22046750	splice-site	splice-site	deletion/read-through	downstream	upstream	0	4	45	392	64	medium	.	.	duplicates(9)	.	.	.	.
MCF-7 (SRR534293)	duplicate	MTAP	CDKN2B-AS1	+/+	+/+	9:21818201	9:22029432	splice-site	splice-site	deletion/read-through	downstream	upstream	3	0	45	392	23	medium	.	.	duplicates(9)	.	.	.	.
MCF-7 (SRR534293)	duplicate	MTAP	CDKN2B-AS1	+/+	+/+	9:21818201	9:22112319	splice-site	splice-site	deletion/read-through	downstream	upstream	24	12	5	392	339	medium	.	.	duplicates(12)	.	.	.	.
MCF-7 (SRR534293)	duplicate	MTAP	CDKN2B-AS1	+/+	+/+	9:21818201	9:22097257	splice-site	splice-site	deletion/read-through	downstream	upstream	8	9	10	392	268	medium	.	.	duplicates(6)	.	.	.	.
MCF-7 (SRR534293)	duplicate	MTAP	CDKN2B-AS1	+/+	+/+	9:21818201	9:22120503	splice-site	splice-site	deletion/read-through	downstream	upstream	1	0	0	392	702	low	.	.	duplicates(1)	.	.	.	.
MCF-7 (SRR534293)	duplicate	MTAP	CDKN2B-AS1	+/+	+/+	9:21818201	9:22120199	splice-site	splice-site	deletion/read-through	downstream	upstream	0	1	0	392	928	low	.	.	.	.	.	.	.
MCF-7 (SRR534293)	confirmed_by_structural_variant	PRPF18	BEND7	+/+	-/+	10:13655251	10:13532361	intron	intron	duplication/5'-5'	downstream	upstream	3	5	31	16	22	medium	.	.	duplicates(6)	.	.	.	.
MCF-7 (SRR534293)	duplicate	RP11-295P9.3	BEND7	+/+	-/+	10:13655251	10:13532361	intron	intron	duplication/5'-5'	downstream	upstream	3	5	30	16	22	medium	.	.	duplicates(5)	.	.	.	.
MCF-7 (SRR534293)	confirmed_by_structural_variant	NCOA3	RP5-947P14.1(446438),RP11-478L17.1(13405)	+/+	./+	20:46135148	1:107073559	intron	intergenic	translocation	downstream	upstream	0	9	29	149	38	medium	.	.	duplicates(16),mismappers(27)	.	.	.	.
MCF-7 (SRR534293)	confirmed_by_structural_variant	NAV1	ELF3(14),RP11-510N19.2(11404)	+/+	./+	1:201732688	1:201986330	intron	intergenic	deletion/read-through	downstream	upstream	6	22	9	44	72	medium	.	.	duplicates(9)	.	.	.	.
MCF-7 (SRR534293)	confirmed_by_structural_variant	ZBTB25	RP11-973N13.2	-/-	-/-	14:64952683	14:65067081	3'UTR	exon	duplication	upstream	downstream	10	20	4	87	35	medium	.	.	duplicates(4)	.	.	.	.
MCF-7 (SRR534293)	validated	GRN	ATXN7L3	+/-	-/-	17:42430179	17:42273806	3'UTR	intron	deletion/read-through/3'-3'	upstream	downstream	18	9	2	1254	44	medium	.	.	duplicates(10)	.	.	.	.
MCF-7 (SRR534293)	confirmed_by_structural_variant	FBRSL1	MUC8(209),FBRSL1(15202)	+/+	./+	12:133118878	12:133050935	intron	intergenic	duplication	downstream	upstream	9	5	14	41	19	medium	.	.	duplicates(12)	.	.	.	.
MCF-7 (SRR534293)	validated	RSBN1	AP4B1	-/-	-/+	1:114354332	1:114437782	splice-site	CDS	inversion/5'-5'	upstream	upstream	1	0	22	258	1038	medium	.	.	duplicates(4)	.	.	.	.
MCF-7 (SRR534293)	confirmed_by_structural_variant	TDRKH	PRICKLE2	-/-	-/-	1:151745806	3:64319054	intron	intron	translocation	upstream	downstream	5	13	4	45	27	medium	.	.	duplicates(1)	.	.	.	.
MCF-7 (SRR534293)	confirmed_by_structural_variant	TTC6	RP11-356O9.2	+/+	-/+	14:38066862	14:38032070	intron	intron	duplication/5'-5'	downstream	upstream	10	8	4	65	19	medium	.	.	duplicates(3)	.	.	.	.
MCF-7 (SRR534293)	confirmed_by_structural_variant	KB-1562D12.1	GRHL2	-/+	+/+	8:102487630	8:102555469	intron	splice-site	deletion/read-through/3'-3'	downstream	upstream	5	5	4	135	373	medium	.	.	duplicates(1)	.	.	.	.
MCF-7 (SRR534293)	duplicate	GRHL2	KB-1562D12.1	+/+	-/+	8:102505017	8:102487410	splice-site	intron	duplication/5'-5'	downstream	upstream	3	7	5	269	118	low	.	.	duplicates(2)	.	.	.	.
MCF-7 (SRR534293)	duplicate	GSN-AS1	SMIM22	-/+	+/+	9:124045670	16:4844953	exon	splice-site	translocation/3'-3'	downstream	upstream	0	0	10	49	137	medium	.	.	duplicates(5),mismappers(4)	.	.	.	.
MCF-7 (SRR534293)	confirmed_by_structural_variant	DHX30	RP11-588P8.1(165044),EMCN(14792)	+/+	./+	3:47866615	4:101301706	CDS	intergenic	translocation	downstream	upstream	6	1	2	185	3	medium	.	.	mismatches(1)	.	.	.	.
MCF-7 (SRR534293)	non-validated	RPS6KB1	TRIM37	+/+	-/+	17:58023625	17:57170315	intron	intron	duplication/5'-5'	downstream	upstream	0	0	9	696	139	medium	.	.	duplicates(3),mismappers(8)	.	.	.	.
MCF-7 (SRR534293)	confirmed_by_structural_variant	NAV1	RP11-510N19.3(19006),CRIP1P3(37819)	+/+	./+	1:201709204	1:202028068	splice-site	intergenic	deletion/read-through	downstream	upstream	0	2	6	87	127	medium	.	.	duplicates(16),mismappers(26)	.	.	.	.
MCF-7 (SRR534293)	confirmed_by_structural_variant	FNDC3B	PLOD2	+/+	-/+	3:172064966	3:145805966	intron	intron	duplication/5'-5'	downstream	upstream	2	4	2	5	8	medium	.	.	mismappers(1)	.	.	.	.
MCF-7 (SRR534293)	non-validated	ANKRD34A	RNVU1-6(6833),HFE2(23342)	+/+	./+	1:145473374	1:145389753	CDS	intergenic	duplication	downstream	upstream	2	5	1	151	10	medium	.	.	duplicates(1)	.	.	.	.
MCF-7 (SRR534293)	non-validated	RBM19	RBM19	-/-	-/-	12:114256050	12:114260004	intron	3'UTR	duplication	upstream	downstream	0	4	4	123	243	medium	.	.	duplicates(2)	.	.	.	.
MCF-7 (SRR534293)	duplicate	FNDC3B	RP11-274H2.2	+/+	+/+	3:172064966	3:145805966	intron	intron	duplication	downstream	upstream	2	4	1	5	8	medium	.	.	mismappers(1)	.	.	.	.
MCF-7 (SRR534293)	confirmed_by_structural_variant	BMP7	PTPRT	-/-	-/+	20:55818122	20:40815645	intron	intron	inversion/5'-5'	upstream	upstream	1	2	4	10	5	medium	.	.	duplicates(1)	.	.	.	.
MCF-7 (SRR534293)	duplicate	RP11-178C3.1	TRIM37	+/+	-/+	17:58023625	17:57170315	intron	intron	duplication/5'-5'	downstream	upstream	0	0	7	696	139	medium	.	.	duplicates(3),mismappers(8)	.	.	.	.
MCF-7 (SRR534293)	validated	BCAS4	ZMYND8	+/+	-/-	20:49411710	20:45850125	splice-site	splice-site	inversion	downstream	downstream	0	3	3	699	1697	medium	.	.	duplicates(3),low_entropy(1)	.	.	.	.
MCF-7 (SRR534293)	non-validated	CBLN4	RNA5SP486(1245),RNU7-92P(29830)	-/-	./+	20:54529273	20:46503262	intron	intergenic	inversion	upstream	upstream	1	0	4	6	19	medium	.	.	duplicates(2)	.	.	.	.
MCF-7 (SRR534293)	confirmed_by_structural_variant	NUFIP2	TAOK1	-/-	+/-	17:27606385	17:27778698	intron	CDS	duplication/5'-5'	upstream	downstream	2	1	2	28	55	medium	.	.	duplicates(3),mismappers(11)	.	.	.	.
MCF-7 (SRR534293)	non-validated	KMT2E	KMT2E	+/+	+/+	7:104719265	7:104717881	intron	exon	duplication	downstream	upstream	0	3	2	24	34	medium	.	.	duplicates(1)	.	.	.	.
MCF-7 (SRR534293)	confirmed_by_structural_variant	DENND2C	RNU7-14P(68110),AC006076.1(62955)	-/-	./+	1:115158632	20:52353407	intron	intergenic	translocation	upstream	upstream	0	0	4	9	4	medium	.	.	duplicates(1),mismappers(5)	.	.	.	.
MCF-7 (SRR534293)	non-validated	SATB2	RP11-261P9.4	-/-	+/+	2:200322285	20:57286183	5'UTR	intron	translocation	upstream	upstream	0	4	0	54	61	medium	.	.	mismatches(4)	.	.	.	.
MCF-7 (SRR534293)	non-validated	RGS3	BRD3	+/+	-/+	9:116233982	9:136897456	intron	3'UTR	deletion/5'-5'	downstream	upstream	0	0	4	18	52	medium	.	.	.	.	.	.	.
MCF-7 (SRR534293)	confirmed_by_structural_variant	ARHGAP10	RP11-364M6.1(14),RP11-752L20.1(32359)	+/+	./+	4:148945568	4:148347517	intron	intergenic	duplication	downstream	upstream	0	0	4	7	8	medium	.	.	duplicates(2)	.	.	.	.
MCF-7 (SRR534293)	non-validated	TBCK	TBCK	-/-	-/-	4:107035765	4:107133992	intron	splice-site	duplication	upstream	downstream	1	2	1	11	159	medium	.	.	.	.	.	.	.
MCF-7 (SRR534293)	non-validated	RP11-638I2.6	RP11-769O8.2	+/-	+/-	14:100757466	18:738068	exon	exon	translocation	upstream	downstream	4	0	0	2069	19	medium	.	.	duplicates(1)	.	.	.	.
MCF-7 (SRR534293)	non-validated	MTAP	RP11-408N14.1	+/+	-/+	9:21818201	9:22210663	splice-site	intron	deletion/read-through/5'-5'	downstream	upstream	1	0	2	392	7	medium	.	.	.	.	.	.	.
MCF-7 (SRR534293)	non-validated	AL672296.1(33249),SH3BP5L(3408)	SH3BP5L	./-	-/-	1:249101240	1:249110753	intergenic	CDS	duplication	upstream	downstream	0	2	1	8	120	medium	.	.	duplicates(3)	.	.	.	.
MCF-7 (SRR534293)	non-validated	LTBP1	MSH6	+/+	+/+	2:33180705	2:48033556	intron	intron	deletion	downstream	upstream	0	3	0	2	186	medium	.	.	.	.	.	.	.
MCF-7 (SRR534293)	non-validated	ATXN7	BCAS1	+/+	-/-	3:63898901	20:52612589	splice-site	splice-site	translocation	downstream	downstream	0	1	2	611	401	medium	.	.	duplicates(1)	.	.	.	.
MCF-7 (SRR534293)	non-validated	TLE1	RP11-289F5.1(49988),RPS20P25(488996)	-/-	./+	9:84302249	9:83536198	splice-site	intergenic	inversion	upstream	upstream	1	0	2	301	8	medium	.	.	.	.	.	.	.
MCF-7 (SRR534293)	non-validated	MACROD2	C14orf132	+/+	+/+	20:15210707	14:96552848	splice-site	splice-site	translocation	downstream	upstream	2	0	1	14	15	medium	.	.	duplicates(1)	.	.	.	.
MCF-7 (SRR534293)	confirmed_by_structural_variant	SYNPR(28594),SNTN(7153)	AMPD1	./-	-/-	3:63631191	1:115231362	intergenic	splice-site	translocation	upstream	downstream	0	1	1	7	3	medium	.	.	.	.	.	.	.
MCF-7 (SRR534293)	non-validated	MAN1A2	CBLN4	+/+	-/-	1:117911107	20:54575903	splice-site	splice-site	translocation	downstream	downstream	0	1	1	59	12	medium	.	.	.	.	.	.	.
MCF-7 (SRR534293)	duplicate	MAN1A2	CBLN4	+/+	-/-	1:117911107	20:54573810	splice-site	splice-site	translocation	downstream	downstream	0	1	0	59	41	medium	.	.	.	.	.	.	.
MCF-7 (SRR534293)	confirmed_by_structural_variant	ARHGAP10	EDNRA	+/+	+/+	4:148944564	4:148441003	splice-site	splice-site	duplication	downstream	upstream	0	1	1	78	14	medium	.	.	.	.	.	.	.
MCF-7 (SRR534293)	duplicate	ARHGAP10	EDNRA	+/+	+/+	4:148944564	4:148406764	splice-site	splice-site	duplication	downstream	upstream	0	1	1	78	3	medium	.	.	duplicates(1)	.	.	.	.
MCF-7 (SRR534293)	duplicate	FOXA1	RP11-356O9.2	-/+	-/+	14:38066862	14:38032070	intron	intron	duplication	downstream	upstream	10	8	4	65	19	low	.	.	duplicates(3)	.	.	.	.
MCF-7 (SRR534293)	confirmed_by_structural_variant	DYNC1H1	DYNC1H1	+/+	+/+	14:102500789	14:102466326	splice-site	splice-site	duplication/non-canonical_splicing	downstream	upstream	5	6	5	424	72	low	.	.	duplicates(8)	.	.	.	.
MCF-7 (SRR534293)	validated	PLCG1	RP1-1J6.2	+/+	-/+	20:39782023	20:39729440	intron	intron	duplication/5'-5'	downstream	upstream	9	0	3	48	10	low	.	.	duplicates(6),mismappers(3)	.	.	.	.
MCF-7 (SRR534293)	confirmed_by_structural_variant	SLC2A13	SLC2A13	-/-	-/-	12:40158262	12:40224282	splice-site	splice-site	duplication/non-canonical_splicing	upstream	downstream	3	1	3	90	59	low	.	.	.	.	.	.	.
MCF-7 (SRR534293)	non-validated	RP11-108K3.1	GLDN	+/+	+/+	15:51329878	15:51675982	splice-site	splice-site	deletion/read-through	downstream	upstream	4	1	2	137	57	low	.	.	duplicates(1)	.	.	.	.
MCF-7 (SRR534293)	duplicate	RP11-108K3.1	GLDN	+/+	+/+	15:51570247	15:51675982	splice-site	splice-site	deletion/read-through	downstream	upstream	2	0	4	188	57	low	.	.	duplicates(2)	.	.	.	.
MCF-7 (SRR534293)	confirmed_by_structural_variant	ARFGEF1	ARFGEF1	-/-	-/-	8:68139682	8:68152525	splice-site	splice-site	duplication/non-canonical_splicing	upstream	downstream	2	5	0	116	76	low	.	.	duplicates(4)	.	.	.	.
MCF-7 (SRR534293)	non-validated	LMBR1	LINC01006	-/-	-/-	7:156469080	7:156398458	splice-site	splice-site	deletion/read-through	upstream	downstream	3	0	3	410	78	low	.	.	duplicates(2),low_entropy(1),mismappers(1),mismatches(1)	.	.	.	.
MCF-7 (SRR534293)	duplicate	LMBR1	LINC01006	-/-	-/-	7:156685622	7:156398074	splice-site	splice-site	deletion/read-through	upstream	downstream	0	1	0	247	43	low	.	.	.	.	.	.	.
MCF-7 (SRR534293)	duplicate	CTC-432M15.3	ACSL6	-/-	-/-	5:131080257	5:131154556	splice-site	splice-site	duplication	upstream	downstream	4	1	1	59	3	low	.	.	duplicates(2),low_entropy(1)	.	.	.	.
MCF-7 (SRR534293)	duplicate	CTC-432M15.3	AC034228.7	-/-	-/-	5:131080257	5:131154556	splice-site	splice-site	duplication	upstream	downstream	4	1	1	59	3	low	.	.	duplicates(2),low_entropy(1)	.	.	.	.
MCF-7 (SRR534293)	validated	C16orf62	IQCK	+/+	+/+	16:19603196	16:19867809	splice-site	splice-site	deletion/read-through	downstream	upstream	2	3	0	93	118	low	.	.	duplicates(2)	.	.	.	.
MCF-7 (SRR534293)	duplicate	C16orf62	IQCK	+/+	+/+	16:19592975	16:19867809	splice-site	splice-site	deletion/read-through	downstream	upstream	1	0	0	115	118	low	.	.	duplicates(6)	.	.	.	.
MCF-7 (SRR534293)	non-validated	RP11-726G1.1(7898),KLRB1(10385)	KLRB1	./+	-/+	12:9736762	12:9747448	intergenic	3'UTR	deletion/read-through	downstream	upstream	0	0	5	38	24	low	.	.	duplicates(4)	.	.	.	.
MCF-7 (SRR534293)	non-validated	AC074117.10	NRBP1	+/+	+/+	2:27582327	2:27662633	exon	splice-site	deletion/read-through	downstream	upstream	1	2	2	770	1018	low	.	.	duplicates(4),mismappers(1)	.	.	.	.
MCF-7 (SRR534293)	non-validated	RECQL4	SOS1	-/-	-/-	8:145736682	2:39269883	3'UTR	intron	translocation	upstream	downstream	5	0	0	1518	3	low	.	.	.	.	.	.	.
MCF-7 (SRR534293)	confirmed_by_structural_variant	SARNP	MMP19	-/-	-/-	12:56194638	12:56236222	splice-site	splice-site	duplication	upstream	downstream	4	0	1	748	156	low	.	.	duplicates(4),mismatches(1)	.	.	.	.
MCF-7 (SRR534293)	duplicate	RP11-762I7.5	MMP19	-/-	-/-	12:56194638	12:56236222	splice-site	splice-site	duplication	upstream	downstream	4	0	1	748	156	low	.	.	duplicates(4),mismatches(1)	.	.	.	.
MCF-7 (SRR534293)	non-validated	MAP2K5	SKOR1	+/+	+/+	15:68099319	15:68121517	3'UTR	splice-site	deletion/read-through	downstream	upstream	1	1	2	47	16	low	.	.	duplicates(3)	.	.	.	.
MCF-7 (SRR534293)	duplicate	MAP2K5	SKOR1	+/+	+/+	15:68065090	15:68121517	splice-site	splice-site	deletion/read-through	downstream	upstream	0	1	1	137	16	low	.	.	duplicates(1)	.	.	.	.
MCF-7 (SRR534293)	non-validated	RP11-96C23.12(10569),RNU6-529P(3192)	GLUD1	./+	-/+	10:88797803	10:88819944	intergenic	CDS	deletion/read-through	downstream	upstream	0	0	4	12	206	low	.	.	.	.	.	.	.
MCF-7 (SRR534293)	non-validated	CCDC101	SEC22B	+/+	+/+	16:28565375	1:145042473	5'UTR	5'UTR	translocation	downstream	upstream	0	0	4	412	8	low	.	.	duplicates(1)	.	.	.	.
MCF-7 (SRR534293)	duplicate	CCDC101	SEC22B	+/+	+/+	16:28565418	1:145109524	splice-site	splice-site	translocation	downstream	upstream	1	0	0	320	474	low	.	.	.	.	.	.	.
MCF-7 (SRR534293)	non-validated	NOC4L	ULK1	+/+	+/+	12:132633440	12:132391437	splice-site	splice-site	duplication	downstream	upstream	1	1	2	304	2539	low	.	.	duplicates(1)	.	.	.	.
MCF-7 (SRR534293)	non-validated	BCAS4	RP5-1010E17.2	+/+	-/-	20:49411710	20:54040148	splice-site	splice-site	inversion	downstream	downstream	0	1	3	699	7	low	.	.	.	.	.	.	.
MCF-7 (SRR534293)	non-validated	AL353698.1(32033),KLF8(124807)	KLF8	./+	+/+	X:56134047	X:56291613	intergenic	splice-site	deletion/read-through	downstream	upstream	2	0	1	25	83	low	.	.	duplicates(1)	.	.	.	.
MCF-7 (SRR534293)	non-validated	CCDC127	PLEKHG4B	-/-	+/-	5:216844	5:181048	splice-site	intron	deletion/read-through/5'-5'	upstream	downstream	0	2	1	79	7	low	.	.	.	.	.	.	.
MCF-7 (SRR534293)	non-validated	AC007386.4(10517),CEP68(8352)	SLC1A4	./-	+/-	2:65275148	2:65248536	intergenic	3'UTR	deletion/read-through	upstream	downstream	0	0	3	54	31	low	.	.	.	.	.	.	.
MCF-7 (SRR534293)	non-validated	RP5-1110E20.1	KRT20	+/+	-/+	17:39007112	17:39033970	splice-site	intron	deletion/read-through/5'-5'	downstream	upstream	0	3	0	114	7	low	.	.	mismappers(1)	.	.	.	.
MCF-7 (SRR534293)	non-validated	BRIP1	NACA2(52820),BRIP1(37244)	-/-	./-	17:59770791	17:59721383	splice-site	intergenic	deletion/read-through	upstream	downstream	0	0	3	1749	24	low	.	.	duplicates(3),low_entropy(3),mismappers(6)	.	.	.	.
MCF-7 (SRR534293)	non-validated	SMG6	RTN4RL1	-/-	-/-	17:2186919	17:1841102	splice-site	splice-site	deletion/read-through	upstream	downstream	0	3	0	66	183	low	.	.	.	.	.	.	.
MCF-7 (SRR534293)	confirmed_by_structural_variant	CADPS	RP4-543J13.1	-/-	-/+	3:62857219	1:114779193	intron	intron	translocation/5'-5'	upstream	upstream	1	0	2	1	0	low	.	.	duplicates(2)	.	.	.	.
MCF-7 (SRR534293)	non-validated	CCDC83	SLC25A1P1(6615),PICALM(15406)	+/+	./+	11:85627276	11:85653321	splice-site	intergenic	deletion/read-through	downstream	upstream	0	3	0	90	38	low	.	.	duplicates(1)	.	.	.	.
MCF-7 (SRR534293)	non-validated	WNK2	C9orf89	+/+	+/+	9:96010116	9:95869956	splice-site	splice-site	duplication	downstream	upstream	0	3	0	50	573	low	.	.	duplicates(1)	.	.	.	.
MCF-7 (SRR534293)	non-validated	MYO9A	PARP6	-/-	-/-	15:72410021	15:72563628	splice-site	splice-site	duplication	upstream	downstream	1	1	1	45	2864	low	.	.	duplicates(4)	.	.	.	.
MCF-7 (SRR534293)	validated	ANKS1A	UHRF1BP1	+/+	+/+	6:34857376	6:34801994	splice-site	splice-site	duplication	downstream	upstream	0	2	1	33	21	low	.	.	.	.	.	.	.
MCF-7 (SRR534293)	confirmed_by_structural_variant	AC005037.3	NIF3L1	+/+	+/+	2:201828353	2:201757969	splice-site	splice-site	duplication	downstream	upstream	3	0	0	124	476	low	.	.	duplicates(1)	.	.	.	.
MCF-7 (SRR534293)	non-validated	MED15	RNA5SP429	+/+	+/+	22:20940112	16:68776383	splice-site	splice-site	translocation	downstream	upstream	3	0	0	4340	71	low	.	.	duplicates(1)	.	.	.	.
MCF-7 (SRR534293)	non-validated	PDP1	AC105081.1(44173),KB-1184D12.1(79668)	+/+	./+	8:94935355	8:95030324	CDS	intergenic	deletion/read-through	downstream	upstream	0	0	2	117	1	low	.	.	duplicates(1),mismappers(1)	.	.	.	.
MCF-7 (SRR534293)	non-validated	FAM49B	ASAP1	-/-	-/-	8:130983189	8:131140336	splice-site	splice-site	duplication	upstream	downstream	1	1	0	166	164	low	.	.	mismappers(1)	.	.	.	.
MCF-7 (SRR534293)	non-validated	NFATC2	IGSF3	-/-	-/-	20:50090517	1:117159079	splice-site	splice-site	translocation	upstream	downstream	0	2	0	71	132	low	.	.	duplicates(1)	.	.	.	.
MCF-7 (SRR534293)	non-validated	SHISA9	CTD-3037G24.4	+/+	-/-	16:13010672	16:12650396	splice-site	splice-site	inversion	downstream	downstream	1	0	1	71	10	low	.	.	.	.	.	.	.
MCF-7 (SRR534293)	confirmed_by_structural_variant	LINC00894	FAM133A(41425),RP1-60G11.1(23212)	+/+	./+	X:149129167	X:93008698	splice-site	intergenic	duplication	downstream	upstream	1	1	0	242	12	low	.	.	low_entropy(1)	.	.	.	.
MCF-7 (SRR534293)	non-validated	RNF213	AURKB	+/+	-/-	17:78325603	17:8108708	splice-site	splice-site	inversion	downstream	downstream	0	2	0	96	2719	low	.	.	.	.	.	.	.
MCF-7 (SRR534293)	confirmed_by_structural_variant	ATP1A1	RN7SL603P(107503),ZFP64(3327)	+/+	./-	1:116939356	20:50664875	splice-site	intergenic	translocation	downstream	downstream	0	2	0	1975	25	low	.	.	.	.	.	.	.
MCF-7 (SRR534293)	non-validated	ZNHIT1	DNAJC11	+/+	-/-	7:100861498	1:6727870	splice-site	splice-site	translocation	downstream	downstream	0	2	0	228	303	low	.	.	.	.	.	.	.
MCF-7 (SRR534293)	non-validated	GTF2A1	STON2	-/-	-/-	14:81658863	14:81745083	splice-site	splice-site	duplication	upstream	downstream	0	1	1	144	16	low	.	.	.	.	.	.	.
MCF-7 (SRR534293)	non-validated	POLR2B	TIAL1	+/+	-/-	4:57843974	10:121338346	splice-site	splice-site	translocation	downstream	downstream	0	2	0	20	2637	low	.	.	duplicates(1)	.	.	.	.
MCF-7 (SRR534293)	non-validated	EMG1	USP5	+/+	+/+	12:7080253	12:6964565	splice-site	splice-site	duplication	downstream	upstream	1	0	1	337	640	low	.	.	.	.	.	.	.
MCF-7 (SRR534293)	non-validated	FANCA	PRPF4B	-/-	+/+	16:89857811	6:4058962	splice-site	splice-site	translocation	upstream	upstream	2	0	0	1911	1038	low	.	.	.	.	.	.	.
MCF-7 (SRR534293)	non-validated	SPG7	KRT80	+/+	-/-	16:89592876	12:52567548	splice-site	splice-site	translocation	downstream	downstream	0	2	0	3244	1721	low	.	.	duplicates(1)	.	.	.	.
MCF-7 (SRR534293)	non-validated	B3GNTL1	TBCD	-/-	+/+	17:80914571	17:80828100	splice-site	splice-site	inversion	upstream	upstream	1	0	1	273	797	low	.	.	duplicates(1)	.	.	.	.
MCF-7 (SRR534293)	non-validated	PREX1	RP1-148H17.1(44376),RPL35AP(21511)	-/-	./-	20:47292731	20:46085447	splice-site	intergenic	deletion	upstream	downstream	1	0	0	644	1	low	.	.	duplicates(1)	.	.	.	.
MCF-7 (SRR534294)	non-validated	TANC2	CA4	+/+	+/+	17:61151375	17:58232675	splice-site	splice-site	duplication	downstream	upstream	291	300	231	1273	1795	high	.	.	duplicates(284),inconsistently_clipped(5),mismatches(3)	.	.	.	.
MCF-7 (SRR534294)	duplicate	TANC2	CA4	+/+	+/+	17:61151375	17:58228803	splice-site	splice-site	duplication	downstream	upstream	1	0	288	1273	56	high	.	.	duplicates(95),mismatches(1)	.	.	.	.
MCF-7 (SRR534294)	duplicate	TANC2	CA4	+/-	+/+	17:61176506	17:58232675	intron	splice-site	inversion/3'-3'	upstream	upstream	13	10	19	461	1795	high	.	.	duplicates(35),mismappers(1)	.	.	.	.
MCF-7 (SRR534294)	duplicate	TANC2	CA4	+/+	+/+	17:61151375	17:58233921	splice-site	splice-site	duplication	downstream	upstream	3	0	24	1273	2074	high	.	.	duplicates(17)	.	.	.	.
MCF-7 (SRR534294)	duplicate	TANC2	CA4	+/+	+/+	17:61086987	17:58232675	splice-site	splice-site	duplication	downstream	upstream	1	1	10	1933	1795	high	.	.	duplicates(9),mismatches(1)	.	.	.	.
MCF-7 (SRR534294)	duplicate	TANC2	CA4	+/+	+/+	17:61151375	17:58235644	splice-site	splice-site	duplication	downstream	upstream	0	1	1	1273	4080	medium	.	.	.	.	.	.	.
MCF-7 (SRR534294)	duplicate	TANC2	CA4	+/+	+/+	17:61151375	17:58235422	splice-site	splice-site	duplication	downstream	upstream	0	1	1	1273	4517	medium	.	.	duplicates(1)	.	.	.	.
MCF-7 (SRR534294)	confirmed_by_structural_variant	FOXA1	TTC6	-/-	+/-	14:38061535	14:38184711	CDS	intron	duplication/5'-5'	upstream	downstream	190	228	80	3903	950	high	.	.	duplicates(192),inconsistently_clipped(2),low_entropy(1),mismatches(1),small_insert_size(1)	.	.	.	.
MCF-7 (SRR534294)	validated	ARFGEF2	SULF2	+/+	-/-	20:47538547	20:46365686	splice-site	splice-site	inversion	downstream	downstream	94	130	218	552	1933	high	.	.	duplicates(232),mismappers(2)	.	.	.	.
MCF-7 (SRR534294)	duplicate	ARFGEF2	SULF2	+/+	-/-	20:47538547	20:46331414	splice-site	splice-site	inversion	downstream	downstream	1	0	0	552	1503	medium	.	.	.	.	.	.	.
MCF-7 (SRR534294)	validated	ABCA5	PPP4R1L	-/-	-/-	17:67309233	20:56847931	splice-site	splice-site	translocation	upstream	downstream	82	119	144	980	747	high	.	.	duplicates(200),low_entropy(8)	.	.	.	.
MCF-7 (SRR534294)	duplicate	ABCA5	PPP4R1L	-/-	-/-	17:67309233	20:56847927	splice-site	splice-site	translocation	upstream	downstream	0	1	134	980	747	high	.	.	duplicates(82)	.	.	.	.
MCF-7 (SRR534294)	validated	BCAS4	BCAS3	+/+	+/+	20:49411710	17:59445688	splice-site	splice-site	translocation	downstream	upstream	8	70	240	727	844	high	.	.	duplicates(147),mismappers(1)	.	.	.	.
MCF-7 (SRR534294)	duplicate	BCAS4	BCAS3	+/+	+/+	20:49411710	17:59430949	splice-site	splice-site	translocation	downstream	upstream	2	11	274	727	107	high	.	.	duplicates(94),mismappers(2)	.	.	.	.
MCF-7 (SRR534294)	duplicate	BCAS4	BCAS3	+/+	+/+	20:49411710	17:59431723	splice-site	splice-site	translocation	downstream	upstream	0	1	246	727	174	high	.	.	duplicates(94),mismappers(2)	.	.	.	.
MCF-7 (SRR534294)	duplicate	BCAS4	BCAS3	+/+	+/+	20:49411710	17:59457867	splice-site	splice-site	translocation	downstream	upstream	0	1	3	727	777	medium	.	.	duplicates(2)	.	.	.	.
MCF-7 (SRR534294)	non-validated	PPP4R1L	TBX4(5821),NACA2(99502)	-/-	./-	20:56809902	17:59568292	intron	intergenic	translocation	upstream	downstream	92	67	119	634	173	high	.	.	duplicates(174)	.	.	.	.
MCF-7 (SRR534294)	non-validated	GSN	SMIM22	+/+	+/+	9:124043840	16:4844953	splice-site	splice-site	translocation	downstream	upstream	22	50	191	504	161	high	.	.	duplicates(161)	.	.	.	.
MCF-7 (SRR534294)	duplicate	GSN	SMIM22	+/+	+/+	9:124044231	16:4839941	splice-site	splice-site	translocation	downstream	upstream	0	1	199	32	30	high	.	.	duplicates(123),mismappers(6)	.	.	.	.
MCF-7 (SRR534294)	duplicate	GSN	SMIM22	+/+	+/+	9:124048463	16:4839941	splice-site	splice-site	translocation	downstream	upstream	0	0	200	28	30	high	.	.	duplicates(119),mismappers(4)	.	.	.	.
MCF-7 (SRR534294)	duplicate	GSN	SMIM22	+/+	+/+	9:124049039	16:4844953	splice-site	splice-site	translocation	downstream	upstream	0	1	198	16	161	high	.	.	duplicates(120)	.	.	.	.
MCF-7 (SRR534294)	duplicate	GSN	SMIM22	+/+	+/+	9:124048463	16:4844953	splice-site	splice-site	translocation	downstream	upstream	1	0	198	28	161	high	.	.	duplicates(120)	.	.	.	.
MCF-7 (SRR534294)	duplicate	GSN	SMIM22	+/+	+/+	9:124045670	16:4844953	splice-site	splice-site	translocation	downstream	upstream	1	0	197	33	161	high	.	.	duplicates(123),mismappers(1)	.	.	.	.
MCF-7 (SRR534294)	duplicate	GSN	SMIM22	+/+	+/+	9:124044231	16:4844953	splice-site	splice-site	translocation	downstream	upstream	0	0	197	32	161	high	.	.	duplicates(121),mismappers(1)	.	.	.	.
MCF-7 (SRR534294)	duplicate	GSN	SMIM22	+/+	+/+	9:124043840	16:4839941	splice-site	splice-site	translocation	downstream	upstream	0	2	193	504	30	high	.	.	duplicates(121),mismappers(3)	.	.	.	.
MCF-7 (SRR534294)	non-validated	ZNF217	SULF2	-/-	-/+	20:52200083	20:46414874	intron	5'UTR	inversion/5'-5'	upstream	upstream	39	27	184	130	2640	high	.	.	duplicates(100),low_entropy(1)	.	.	.	.
MCF-7 (SRR534294)	confirmed_by_structural_variant	ATXN7	RP5-947P14.1(131806),RP11-478L17.1(328037)	+/+	./+	3:63898901	1:106758927	splice-site	intergenic	translocation	downstream	upstream	72	60	19	546	198	high	.	.	duplicates(88),mismappers(8),mismatches(1)	.	.	.	.
MCF-7 (SRR534294)	confirmed_by_structural_variant	DDX42	SLC2A10(3387),AL031055.1(71125)	+/+	./+	17:61883134	20:45368352	exon	intergenic	translocation	downstream	upstream	44	44	33	414	151	high	.	.	duplicates(60)	.	.	.	.
MCF-7 (SRR534294)	confirmed_by_structural_variant	NCOA3	RP11-478L17.1(36653),RP11-110F24.1(198826)	+/+	./+	20:46130763	1:107124019	splice-site	intergenic	translocation	downstream	upstream	9	37	65	2041	157	high	.	.	duplicates(48),low_entropy(1),mismappers(1)	.	.	.	.
MCF-7 (SRR534294)	confirmed_by_structural_variant	TRAPPC4	DSCAML1	+/+	-/+	11:118892596	11:117386244	splice-site	intron	duplication/5'-5'	downstream	upstream	84	6	18	440	70	high	.	.	duplicates(32),mismappers(1),mismatches(2)	.	.	.	.
MCF-7 (SRR534294)	validated	ADAMTS19	SLC27A6	+/+	+/+	5:128797450	5:128364038	splice-site	splice-site	duplication	downstream	upstream	16	31	30	177	168	high	.	.	duplicates(28)	.	.	.	.
MCF-7 (SRR534294)	duplicate	ADAMTS19	SLC27A6	+/+	+/+	5:128796175	5:128364038	splice-site	splice-site	duplication	downstream	upstream	7	1	8	402	168	high	.	.	duplicates(7)	.	.	.	.
MCF-7 (SRR534294)	duplicate	ADAMTS19	SLC27A6	+/-	+/+	5:128797374	5:128364038	CDS	splice-site	inversion/3'-3'	upstream	upstream	0	1	0	197	168	low	.	.	.	.	.	.	.
MCF-7 (SRR534294)	validated	GCN1L1	MSI1	-/-	-/-	12:120628101	12:120785317	splice-site	splice-site	duplication	upstream	downstream	14	12	47	358	169	high	.	.	duplicates(68)	.	.	.	.
MCF-7 (SRR534294)	duplicate	GCN1L1	MSI1	-/-	-/-	12:120628101	12:120789203	splice-site	splice-site	duplication	upstream	downstream	2	1	54	358	46	high	.	.	duplicates(47)	.	.	.	.
MCF-7 (SRR534294)	confirmed_by_structural_variant	ATP9A	RNU7-92P(41182),RP11-347D21.1(5194)	-/-	./+	20:50255882	20:46574349	splice-site	intergenic	inversion	upstream	upstream	46	13	13	540	107	high	.	.	duplicates(38)	.	.	.	.
MCF-7 (SRR534294)	validated	MYO9B	FCHO1	+/+	+/+	19:17213367	19:17881234	splice-site	splice-site	deletion	downstream	upstream	24	14	31	187	58	high	.	.	duplicates(37)	.	.	.	.
MCF-7 (SRR534294)	duplicate	MYO9B	FCHO1	+/+	+/+	19:17213367	19:17881273	splice-site	splice-site	deletion	downstream	upstream	2	0	15	187	85	high	.	.	duplicates(7)	.	.	.	.
MCF-7 (SRR534294)	duplicate	MYO9B	FCHO1	+/+	+/+	19:17213367	19:17881601	splice-site	splice-site	deletion	downstream	upstream	0	1	0	187	48	medium	.	.	.	.	.	.	.
MCF-7 (SRR534294)	confirmed_by_structural_variant	SARNP	RNU1-69P	-/-	+/-	12:56194638	12:56268549	splice-site	exon	duplication/5'-5'	upstream	downstream	55	8	1	810	70	high	.	.	duplicates(49),mismappers(3)	.	.	.	.
MCF-7 (SRR534294)	duplicate	RP11-762I7.5	RNU1-69P	-/-	+/-	12:56194638	12:56268549	splice-site	exon	duplication/5'-5'	upstream	downstream	55	8	1	810	70	high	.	.	duplicates(49),mismappers(3)	.	.	.	.
MCF-7 (SRR534294)	validated	ATXN7L3	FAM171A2	-/-	-/-	17:42275388	17:42433956	splice-site	splice-site	duplication	upstream	downstream	5	42	10	267	136	high	.	.	duplicates(25)	.	.	.	.
MCF-7 (SRR534294)	validated	RSBN1	AP4B1-AS1	-/-	+/+	1:114354332	1:114442494	splice-site	splice-site	inversion	upstream	upstream	23	7	26	295	238	high	.	.	duplicates(28)	.	.	.	.
MCF-7 (SRR534294)	duplicate	RSBN1	AP4B1-AS1	-/-	+/+	1:114354332	1:114440490	splice-site	splice-site	inversion	upstream	upstream	6	2	27	295	1514	high	.	.	duplicates(15)	.	.	.	.
MCF-7 (SRR534294)	validated	RP11-1021N1.1	ABCC1	+/+	+/+	16:15528616	16:16170183	splice-site	splice-site	deletion	downstream	upstream	33	8	14	264	350	high	.	.	duplicates(37)	.	.	.	.
MCF-7 (SRR534294)	duplicate	C16orf45	ABCC1	+/+	+/+	16:15528616	16:16170183	splice-site	splice-site	deletion	downstream	upstream	33	8	14	264	350	high	.	.	duplicates(37)	.	.	.	.
MCF-7 (SRR534294)	confirmed_by_structural_variant	BCAS3	SNTN(39526),AC136289.1(23747)	+/+	./+	17:58824640	3:63704222	splice-site	intergenic	translocation	downstream	upstream	22	14	16	315	125	high	.	.	duplicates(20),mismatches(1)	.	.	.	.
MCF-7 (SRR534294)	validated	SULF2	PRICKLE2	-/-	-/-	20:46414087	3:64085601	splice-site	splice-site	translocation	upstream	downstream	1	20	28	447	295	high	.	.	duplicates(30),low_entropy(1)	.	.	.	.
MCF-7 (SRR534294)	duplicate	SULF2	PRICKLE2	-/-	-/-	20:46414792	3:64085601	splice-site	splice-site	translocation	upstream	downstream	5	18	5	2387	295	high	.	.	duplicates(14)	.	.	.	.
MCF-7 (SRR534294)	duplicate	SULF2	PRICKLE2	-/-	-/-	20:46414579	3:64085601	splice-site	splice-site	translocation	upstream	downstream	3	4	7	1000	295	high	.	.	duplicates(7)	.	.	.	.
MCF-7 (SRR534294)	duplicate	SULF2	PRICKLE2	-/-	-/-	20:46411670	3:64102178	intron	intron	translocation	upstream	downstream	2	16	37	95	29	medium	.	.	duplicates(26)	.	.	.	.
MCF-7 (SRR534294)	validated	SMARCA4	CARM1	+/+	+/+	19:11097269	19:11015627	splice-site	splice-site	duplication	downstream	upstream	14	6	27	181	354	high	.	.	duplicates(32)	.	.	.	.
MCF-7 (SRR534294)	duplicate	SMARCA4	CARM1	+/+	+/+	19:11071850	19:11015627	splice-site	splice-site	duplication	downstream	upstream	1	0	2	193	354	medium	.	.	duplicates(1)	.	.	.	.
MCF-7 (SRR534294)	validated	PAPOLA	AK7	+/+	+/+	14:96968937	14:96904172	splice-site	splice-site	duplication	downstream	upstream	24	14	5	469	42	high	.	.	duplicates(16)	.	.	.	.
MCF-7 (SRR534294)	duplicate	PAPOLA	AK7	+/+	+/+	14:96971036	14:96904172	splice-site	splice-site	duplication	downstream	upstream	1	0	5	19	42	high	.	.	.	.	.	.	.
MCF-7 (SRR534294)	confirmed_by_structural_variant	UNK	ABCA5(1526),SNORA40(26363)	+/+	./-	17:73816189	17:67324911	splice-site	intergenic	inversion	downstream	downstream	22	11	8	543	140	high	.	.	duplicates(19)	.	.	.	.
MCF-7 (SRR534294)	confirmed_by_structural_variant	LEMD3	RP1-74B13.2	+/+	+/+	12:65612399	12:111283403	splice-site	splice-site	deletion	downstream	upstream	19	10	10	162	93	high	.	.	duplicates(14),low_entropy(1)	.	.	.	.
MCF-7 (SRR534294)	validated	AC099850.1	VMP1	+/+	+/+	17:57184952	17:57915656	splice-site	splice-site	deletion	downstream	upstream	15	12	12	832	36593	high	.	.	duplicates(21)	.	.	.	.
MCF-7 (SRR534294)	duplicate	AC099850.1	VMP1	+/+	+/+	17:57184952	17:57911373	splice-site	splice-site	deletion	downstream	upstream	4	1	16	832	478	high	.	.	duplicates(25),mismappers(49),mismatches(1)	.	.	.	.
MCF-7 (SRR534294)	non-validated	SLC25A24	SARS	-/-	+/+	1:108724563	1:109777832	splice-site	splice-site	inversion	upstream	upstream	5	19	12	229	720	high	.	.	duplicates(20)	.	.	.	.
MCF-7 (SRR534294)	non-validated	RP5-947P14.1(173599),RP11-478L17.1(286244)	BCAS1	./+	-/-	1:106800720	20:52612589	intergenic	splice-site	translocation	downstream	downstream	6	17	9	225	319	high	.	.	duplicates(12),mismappers(2)	.	.	.	.
MCF-7 (SRR534294)	confirmed_by_structural_variant	TTC6	RP11-356O9.1	+/+	+/+	14:38065213	14:38033424	splice-site	exon	duplication	downstream	upstream	9	8	15	274	142	high	.	.	duplicates(15),low_entropy(4)	.	.	.	.
MCF-7 (SRR534294)	duplicate	TTC6	RP11-356O9.1	+/+	+/+	14:38065213	14:38047909	splice-site	splice-site	duplication	downstream	upstream	1	1	0	274	98	low	.	.	duplicates(1)	.	.	.	.
MCF-7 (SRR534294)	validated	B3GNTL1	SLC9A8	-/-	+/+	17:80914062	20:48494518	intron	splice-site	translocation	upstream	upstream	9	8	13	70	305	high	.	.	duplicates(12)	.	.	.	.
MCF-7 (SRR534294)	duplicate	B3GNTL1	SLC9A8	-/-	+/+	17:80914571	20:48494518	splice-site	splice-site	translocation	upstream	upstream	10	9	8	290	305	high	.	.	duplicates(17)	.	.	.	.
MCF-7 (SRR534294)	duplicate	B3GNTL1	SLC9A8	-/-	+/+	17:80914571	20:48497461	splice-site	splice-site	translocation	upstream	upstream	1	0	0	290	613	medium	.	.	.	.	.	.	.
MCF-7 (SRR534294)	non-validated	CD180(18305),CTD-2187J20.1(52918)	RP11-434D9.1	./+	+/+	5:66510932	5:66915619	intergenic	splice-site	deletion	downstream	upstream	4	13	13	103	90	high	.	.	duplicates(16),mismatches(2)	.	.	.	.
MCF-7 (SRR534294)	validated	CHEK2	CTA-292E10.6	-/-	+/-	22:29120965	22:29206922	splice-site	intron	duplication/5'-5'	upstream	downstream	23	2	5	377	47	high	.	.	duplicates(15)	.	.	.	.
MCF-7 (SRR534294)	confirmed_by_structural_variant	PDE8A	SCAND2P	+/+	+/+	15:85525579	15:85180578	splice-site	splice-site	duplication	downstream	upstream	0	10	18	195	169	high	.	.	duplicates(11)	.	.	.	.
MCF-7 (SRR534294)	duplicate	PDE8A	SCAND2P	+/+	+/+	15:85527687	15:85178655	intron	intron	duplication	downstream	upstream	0	0	18	10	21	medium	.	.	duplicates(7),mismappers(4)	.	.	.	.
MCF-7 (SRR534294)	validated	RPS6KB1	VMP1	+/+	+/+	17:57992064	17:57917129	splice-site	splice-site	duplication	downstream	upstream	8	12	8	1003	39489	high	.	.	duplicates(14)	.	.	.	.
MCF-7 (SRR534294)	duplicate	RPS6KB1	VMP1	+/+	+/+	17:57987972	17:57915656	splice-site	splice-site	duplication	downstream	upstream	9	13	6	2786	36593	high	.	.	duplicates(19)	.	.	.	.
MCF-7 (SRR534294)	non-validated	BCAS1	RP11-347D21.3(118443),SNORD36(28755)	-/-	./-	20:52686972	20:46735931	splice-site	intergenic	deletion	upstream	downstream	3	10	14	311	40	high	.	.	duplicates(10),low_entropy(1)	.	.	.	.
MCF-7 (SRR534294)	validated	BCAS3	ATXN7	+/+	+/+	17:58824640	3:63981181	splice-site	splice-site	translocation	downstream	upstream	6	8	11	315	381	high	.	.	duplicates(17)	.	.	.	.
MCF-7 (SRR534294)	validated	PNPLA7	DPH7	-/-	-/-	9:140409831	9:140450100	splice-site	splice-site	duplication	upstream	downstream	13	4	8	123	2443	high	.	.	duplicates(13),low_entropy(2)	.	.	.	.
MCF-7 (SRR534294)	duplicate	PNPLA7	DPH7	-/-	-/-	9:140409831	9:140451267	splice-site	splice-site	duplication	upstream	downstream	0	1	8	123	209	high	.	.	duplicates(4)	.	.	.	.
MCF-7 (SRR534294)	duplicate	PNPLA7	DPH7	-/-	-/-	9:140414369	9:140450100	splice-site	splice-site	duplication	upstream	downstream	1	0	0	134	2443	medium	.	.	.	.	.	.	.
MCF-7 (SRR534294)	confirmed_by_structural_variant	TPD52L2	SLMO2P3(48054),RP11-180P8.1(45703)	+/+	./+	20:62500794	17:60967060	splice-site	intergenic	translocation	downstream	upstream	16	4	4	1274	95	high	.	.	duplicates(10)	.	.	.	.
MCF-7 (SRR534294)	validated	TAF4	BRIP1	-/-	-/-	20:60639507	17:59926617	splice-site	splice-site	translocation	upstream	downstream	0	9	13	502	893	high	.	.	duplicates(9)	.	.	.	.
MCF-7 (SRR534294)	duplicate	TAF4	BRIP1	-/-	-/-	20:60639507	17:59924581	splice-site	splice-site	translocation	upstream	downstream	2	3	5	502	1139	high	.	.	duplicates(4),low_entropy(1)	.	.	.	.
MCF-7 (SRR534294)	non-validated	SULF2(273),RNU7-173P(40080)	SULF2	./+	-/-	20:46415633	20:46386207	intergenic	splice-site	inversion	downstream	downstream	7	9	5	919	836	high	.	.	duplicates(12)	.	.	.	.
MCF-7 (SRR534294)	validated	POP1	MATN2	+/+	+/+	8:99129618	8:99042690	splice-site	splice-site	duplication	downstream	upstream	0	20	0	48	260	high	.	.	duplicates(10),low_entropy(2)	.	.	.	.
MCF-7 (SRR534294)	duplicate	POP1	MATN2	+/+	+/+	8:99130093	8:99042690	splice-site	splice-site	duplication	downstream	upstream	1	0	0	26	260	medium	.	.	duplicates(1)	.	.	.	.
MCF-7 (SRR534294)	validated	TXLNG	SYAP1	+/+	+/+	X:16804712	X:16753350	splice-site	splice-site	duplication	downstream	upstream	1	2	17	117	115	high	.	.	duplicates(9)	.	.	.	.
MCF-7 (SRR534294)	confirmed_by_structural_variant	TOP1	RNA5SP484(163361),RNU2-52P(6615)	+/+	./+	20:39706277	20:39646230	splice-site	intergenic	duplication	downstream	upstream	10	8	2	235	41	high	.	.	duplicates(9)	.	.	.	.
MCF-7 (SRR534294)	validated	ESR1	CCDC170	+/+	+/+	6:152023140	6:151894309	splice-site	splice-site	duplication	downstream	upstream	3	15	2	65	160	high	.	.	duplicates(8)	.	.	.	.
MCF-7 (SRR534294)	duplicate	ESR1	CCDC170	+/+	+/+	6:152023140	6:151907024	splice-site	splice-site	duplication	downstream	upstream	0	1	1	65	407	medium	.	.	.	.	.	.	.
MCF-7 (SRR534294)	non-validated	RPS6KB1	TRIM37	+/+	-/+	17:58022879	17:57170603	splice-site	intron	duplication/5'-5'	downstream	upstream	7	6	6	3740	167	high	.	.	duplicates(9),mismappers(2)	.	.	.	.
MCF-7 (SRR534294)	duplicate	RP11-178C3.1	TRIM37	+/+	-/+	17:58022879	17:57170603	splice-site	intron	duplication/5'-5'	downstream	upstream	7	6	6	3740	167	high	.	.	duplicates(8)	.	.	.	.
MCF-7 (SRR534294)	non-validated	PBX3	UCK1	+/+	-/-	9:128510902	9:134413015	splice-site	5'UTR	inversion	downstream	downstream	0	10	6	463	247	high	.	.	duplicates(11),mismappers(2)	.	.	.	.
MCF-7 (SRR534294)	confirmed_by_structural_variant	RSBN1	VAV3	-/-	-/+	1:114354332	1:108212323	splice-site	intron	inversion/5'-5'	upstream	upstream	5	4	7	295	43	high	.	.	duplicates(5)	.	.	.	.
MCF-7 (SRR534294)	confirmed_by_structural_variant	ATP9A	RP11-347D21.1	-/-	+/+	20:50255882	20:46580501	splice-site	splice-site	inversion	upstream	upstream	2	5	9	540	160	high	.	.	duplicates(6)	.	.	.	.
MCF-7 (SRR534294)	validated	TEX14	PTPRG	-/-	+/+	17:56636814	3:61608137	splice-site	intron	translocation	upstream	upstream	2	12	1	49	41	high	.	.	duplicates(3)	.	.	.	.
MCF-7 (SRR534294)	duplicate	TEX14	PTPRG	-/-	+/+	17:56636814	3:61734552	splice-site	splice-site	translocation	upstream	upstream	0	1	0	49	40	low	.	.	.	.	.	.	.
MCF-7 (SRR534294)	non-validated	RAP1A	AL354984.3(23265),AL354984.2(68098)	+/+	./-	1:112162556	20:56574414	splice-site	intergenic	translocation	downstream	downstream	5	0	9	69	27	high	.	.	duplicates(11),homopolymer(7),low_entropy(1)	.	.	.	.
MCF-7 (SRR534294)	validated	GATAD2B	NUP210L	-/-	-/-	1:153895209	1:154002530	splice-site	splice-site	duplication	upstream	downstream	0	6	8	48	28	high	.	.	duplicates(4)	.	.	.	.
MCF-7 (SRR534294)	duplicate	GATAD2B	NUP210L	-/-	-/-	1:153895209	1:154000073	splice-site	splice-site	duplication	upstream	downstream	1	3	2	48	81	high	.	.	.	.	.	.	.
MCF-7 (SRR534294)	non-validated	HIPK1	DENND2C	+/+	-/-	1:114484081	1:115161103	splice-site	splice-site	inversion	downstream	downstream	8	4	1	263	36	high	.	.	duplicates(4),mismappers(2)	.	.	.	.
MCF-7 (SRR534294)	confirmed_by_structural_variant	SLC25A19	RN7SL603P(39160),ZFP64(71670)	-/-	./-	17:73279504	20:50596532	splice-site	intergenic	translocation	upstream	downstream	3	4	6	336	44	high	.	.	duplicates(3)	.	.	.	.
MCF-7 (SRR534294)	validated	PLCG1	TOP1	+/+	+/+	20:39766498	20:39729849	splice-site	splice-site	duplication	downstream	upstream	3	6	4	2238	500	high	.	.	duplicates(3)	.	.	.	.
MCF-7 (SRR534294)	duplicate	PLCG1	TOP1	+/+	+/+	20:39765675	20:39729849	splice-site	splice-site	duplication	downstream	upstream	0	1	0	382	500	medium	.	.	.	.	.	.	.
MCF-7 (SRR534294)	duplicate	PLCG1	TOP1	+/+	+/+	20:39766498	20:39741422	splice-site	splice-site	duplication	downstream	upstream	1	0	0	2238	812	medium	.	.	duplicates(2)	.	.	.	.
MCF-7 (SRR534294)	validated	USP31	CRYL1	-/-	-/-	16:23159959	13:21013893	splice-site	splice-site	translocation	upstream	downstream	3	5	4	49	99	high	.	.	duplicates(9)	.	.	.	.
MCF-7 (SRR534294)	duplicate	USP31	CRYL1	-/-	-/-	16:23159959	13:21006435	splice-site	splice-site	translocation	upstream	downstream	1	0	2	49	137	high	.	.	.	.	.	.	.
MCF-7 (SRR534294)	validated	TBL1XR1	RGS17	-/-	-/-	3:176914909	6:153365178	splice-site	splice-site	translocation	upstream	downstream	3	8	1	77	177	high	.	.	duplicates(2)	.	.	.	.
MCF-7 (SRR534294)	duplicate	TBL1XR1	RGS17	-/-	-/-	3:176849151	6:153365178	splice-site	splice-site	translocation	upstream	downstream	1	1	1	39	177	high	.	.	duplicates(2)	.	.	.	.
MCF-7 (SRR534294)	duplicate	RGS17	TBL1XR1	-/-	-/-	6:153365035	3:176915227	splice-site	5'UTR	translocation	upstream	downstream	1	0	0	136	26	low	.	.	.	.	.	.	.
MCF-7 (SRR534294)	non-validated	PSMD6-AS2	PRICKLE2	+/-	-/-	3:63995783	3:64085601	intron	splice-site	duplication/3'-3'	upstream	downstream	6	3	3	102	295	high	.	.	duplicates(5)	.	.	.	.
MCF-7 (SRR534294)	non-validated	BMP7	SULF2	-/-	-/+	20:55840761	20:46415149	splice-site	5'UTR	inversion/5'-5'	upstream	upstream	4	4	4	586	3725	high	.	.	duplicates(6)	.	.	.	.
MCF-7 (SRR534294)	validated	BCAS3	AMPD1	+/+	-/-	17:58786686	1:115222329	splice-site	splice-site	translocation	downstream	downstream	1	4	7	429	22	high	.	.	duplicates(5)	.	.	.	.
MCF-7 (SRR534294)	non-validated	PPM1D	USP32	+/+	-/+	17:58678247	17:58342944	splice-site	intron	duplication/5'-5'	downstream	upstream	5	5	1	747	50	high	.	.	duplicates(13),mismappers(20)	.	.	.	.
MCF-7 (SRR534294)	validated	RAD51C	ATXN7	+/+	+/+	17:56801461	3:63965591	splice-site	splice-site	translocation	downstream	upstream	6	5	0	835	95	high	.	.	duplicates(11)	.	.	.	.
MCF-7 (SRR534294)	duplicate	RAD51C	ATXN7	+/+	+/+	17:56798173	3:63965591	splice-site	splice-site	translocation	downstream	upstream	3	2	0	897	95	high	.	.	duplicates(1)	.	.	.	.
MCF-7 (SRR534294)	duplicate	RAD51C	ATXN7	+/+	+/+	17:56787351	3:63965591	splice-site	splice-site	translocation	downstream	upstream	0	1	0	894	95	medium	.	.	.	.	.	.	.
MCF-7 (SRR534294)	validated	AHCYL1	RAD51C	+/+	+/+	1:110527794	17:56811479	splice-site	splice-site	translocation	downstream	upstream	6	2	3	370	1188	high	.	.	duplicates(3)	.	.	.	.
MCF-7 (SRR534294)	duplicate	AHCYL1	RAD51C	+/+	+/+	1:110547073	17:56811479	splice-site	splice-site	translocation	downstream	upstream	0	1	3	31	1188	high	.	.	.	.	.	.	.
MCF-7 (SRR534294)	duplicate	AHCYL1	RAD51C	+/+	+/+	1:110547809	17:56810938	intron	intron	translocation	downstream	upstream	9	16	5	31	106	medium	.	.	duplicates(7),mismappers(1)	.	.	.	.
MCF-7 (SRR534294)	confirmed_by_structural_variant	DENND2C	RNU7-14P(71646),AC006076.1(59419)	-/-	./+	1:115161007	20:52356943	splice-site	intergenic	translocation	upstream	upstream	2	6	2	43	28	high	.	.	duplicates(7)	.	.	.	.
MCF-7 (SRR534294)	non-validated	TANC2	TLK2(939),MRC2(10981)	+/+	./+	17:61151375	17:60693781	splice-site	intergenic	duplication	downstream	upstream	3	3	4	1273	53	high	.	.	duplicates(4)	.	.	.	.
MCF-7 (SRR534294)	non-validated	NCOA3	AC005808.3	+/+	+/+	20:46266527	20:52224820	splice-site	5'UTR	deletion	downstream	upstream	1	7	2	1747	49	high	.	.	duplicates(6)	.	.	.	.
MCF-7 (SRR534294)	duplicate	NCOA3	AC005808.3	+/+	+/+	20:46266527	20:52234376	splice-site	splice-site	deletion	downstream	upstream	2	1	0	1747	6	low	.	.	duplicates(1)	.	.	.	.
MCF-7 (SRR534294)	non-validated	TRIM37	TBC1D3P1-DHX40P1	-/-	-/-	17:57161363	17:58066705	splice-site	splice-site	duplication	upstream	downstream	4	3	3	2460	23	high	.	.	duplicates(5)	.	.	.	.
MCF-7 (SRR534294)	duplicate	TRIM37	TBC1D3P1-DHX40P1	-/-	-/-	17:57168661	17:58066705	splice-site	splice-site	duplication	upstream	downstream	1	0	0	2114	23	medium	.	.	.	.	.	.	.
MCF-7 (SRR534294)	duplicate	TRIM37	TBC1D3P1-DHX40P1	-/-	-/-	17:57165652	17:58064965	splice-site	splice-site	duplication	upstream	downstream	0	1	0	2595	34	medium	.	.	duplicates(2)	.	.	.	.
MCF-7 (SRR534294)	duplicate	TRIM37	DHX40P1	-/-	-/-	17:57161363	17:58066705	splice-site	splice-site	duplication	upstream	downstream	4	3	3	2460	23	high	.	.	duplicates(5)	.	.	.	.
MCF-7 (SRR534294)	duplicate	TRIM37	DHX40P1	-/-	-/-	17:57168661	17:58066705	splice-site	splice-site	duplication	upstream	downstream	1	0	0	2114	23	medium	.	.	.	.	.	.	.
MCF-7 (SRR534294)	duplicate	TRIM37	DHX40P1	-/-	-/-	17:57165652	17:58064965	splice-site	splice-site	duplication	upstream	downstream	0	1	0	2595	34	medium	.	.	duplicates(2)	.	.	.	.
MCF-7 (SRR534294)	validated	ATP1A1	ZFP64	+/+	-/-	1:116939356	20:50668671	splice-site	splice-site	translocation	downstream	downstream	8	0	1	1872	37	high	.	.	duplicates(10),mismappers(8)	.	.	.	.
MCF-7 (SRR534294)	duplicate	ATP1A1	ZFP64	+/+	-/-	1:116939622	20:50680236	intron	intron	translocation	downstream	downstream	12	11	4	63	21	medium	.	.	duplicates(16),mismappers(8)	.	.	.	.
MCF-7 (SRR534294)	non-validated	LRRC42	WDHD1	+/-	-/-	1:54419958	14:55408408	intron	splice-site	translocation/3'-3'	upstream	downstream	2	5	2	115	228	high	.	.	duplicates(6)	.	.	.	.
MCF-7 (SRR534294)	duplicate	WDHD1	LRRC42	-/-	+/-	14:55411050	1:54420493	splice-site	intron	translocation/5'-5'	upstream	downstream	3	2	0	188	188	high	.	.	duplicates(3)	.	.	.	.
MCF-7 (SRR534294)	non-validated	RBM6	BCAR1	+/+	-/-	3:50036946	16:75276988	splice-site	splice-site	translocation	downstream	downstream	3	5	1	1233	349	high	.	.	duplicates(11)	.	.	.	.
MCF-7 (SRR534294)	validated	MYO6	SENP6	+/+	+/+	6:76459140	6:76388299	splice-site	splice-site	duplication	downstream	upstream	4	1	4	94	437	high	.	.	duplicates(1),mismappers(1)	.	.	.	.
MCF-7 (SRR534294)	non-validated	HOOK3	RP13-359K18.1(187175),RNU6-472P(17982)	+/+	./-	8:42761401	12:34058327	splice-site	intergenic	translocation	downstream	downstream	3	3	2	86	4	high	.	.	duplicates(6)	.	.	.	.
MCF-7 (SRR534294)	non-validated	BMP7	PSMD6(39505),RP11-129B22.1(4477)	-/-	./+	20:55840761	3:64049163	splice-site	intergenic	translocation	upstream	upstream	1	5	2	586	67	high	.	.	duplicates(1)	.	.	.	.
MCF-7 (SRR534294)	validated	RP11-129B22.1	SULF2	+/+	-/+	3:64053837	20:46415149	splice-site	5'UTR	translocation/5'-5'	downstream	upstream	2	1	5	113	3725	high	.	.	duplicates(4)	.	.	.	.
MCF-7 (SRR534294)	validated	BCAS4	ZMYND8	+/+	-/-	20:49411710	20:45850125	splice-site	splice-site	inversion	downstream	downstream	0	2	6	727	1368	high	.	.	duplicates(2),low_entropy(1)	.	.	.	.
MCF-7 (SRR534294)	non-validated	UBXN4	R3HDM1	+/+	+/+	2:136530117	2:136432902	splice-site	splice-site	duplication	downstream	upstream	3	2	3	1379	192	high	.	.	duplicates(4)	.	.	.	.
MCF-7 (SRR534294)	duplicate	UBXN4	R3HDM1	+/+	+/+	2:136531028	2:136419789	intron	intron	duplication	downstream	upstream	2	1	5	152	3	medium	.	.	duplicates(3)	.	.	.	.
MCF-7 (SRR534294)	non-validated	ATP1A1	RP11-323A7.1(166064),RP11-470F18.1(10613)	+/+	./+	1:116939356	9:78183972	splice-site	intergenic	translocation	downstream	upstream	6	0	1	1872	11	high	.	.	duplicates(4)	.	.	.	.
MCF-7 (SRR534294)	non-validated	PARD6B	CADPS(23740),RP11-24H1.1(27252)	+/+	./-	20:49348389	3:62884794	splice-site	intergenic	translocation	downstream	downstream	5	2	0	1526	164	high	.	.	duplicates(6),mismappers(12)	.	.	.	.
MCF-7 (SRR534294)	validated	VAV3	RP5-1073O3.2	-/-	+/+	1:108138834	1:114357009	splice-site	splice-site	inversion	upstream	upstream	2	3	2	263	25	high	.	.	duplicates(2)	.	.	.	.
MCF-7 (SRR534294)	non-validated	GBF1	MACROD2	+/+	+/+	10:104019873	20:14665489	splice-site	splice-site	translocation	downstream	upstream	3	1	3	195	14	high	.	.	duplicates(5)	.	.	.	.
MCF-7 (SRR534294)	confirmed_by_structural_variant	RNU6-472P(23559),Y_RNA(35426)	SLC16A7	./-	+/+	12:34099974	12:60098553	intergenic	splice-site	inversion	upstream	upstream	1	5	0	5	25	high	.	.	duplicates(3)	.	.	.	.
MCF-7 (SRR534294)	non-validated	MAN1A2	CBLN4	+/+	-/-	1:117911107	20:54575903	splice-site	splice-site	translocation	downstream	downstream	4	0	2	59	20	high	.	.	duplicates(1)	.	.	.	.
MCF-7 (SRR534294)	duplicate	MAN1A2	CBLN4	+/+	-/-	1:117911107	20:54573810	splice-site	splice-site	translocation	downstream	downstream	0	1	0	59	44	medium	.	.	.	.	.	.	.
MCF-7 (SRR534294)	confirmed_by_structural_variant	DHX30	EMCN	+/+	-/+	3:47860754	4:101342411	splice-site	intron	translocation/5'-5'	downstream	upstream	1	1	4	81	83	high	.	.	duplicates(1)	.	.	.	.
MCF-7 (SRR534294)	non-validated	SPTLC1	RP11-27K13.3	-/-	-/-	9:94842298	1:117592956	splice-site	splice-site	translocation	upstream	downstream	3	3	0	365	34	high	.	.	duplicates(7)	.	.	.	.
MCF-7 (SRR534294)	duplicate	SPTLC1	RP11-27K13.3	-/-	-/-	9:94842298	1:117574958	splice-site	splice-site	translocation	upstream	downstream	1	0	0	365	23	medium	.	.	.	.	.	.	.
MCF-7 (SRR534294)	confirmed_by_structural_variant	ARRB1	KLHL35	-/-	-/-	11:75014643	11:75136626	splice-site	splice-site	duplication	upstream	downstream	1	1	4	45	433	high	.	.	duplicates(2)	.	.	.	.
MCF-7 (SRR534294)	duplicate	ARRB1	KLHL35	-/-	-/-	11:75062632	11:75136626	splice-site	splice-site	duplication	upstream	downstream	0	1	0	142	433	medium	.	.	.	.	.	.	.
MCF-7 (SRR534294)	confirmed_by_structural_variant	ATP9A	RP11-347D21.3(21864),SNORD36(125334)	-/-	./+	20:50255882	20:46639352	splice-site	intergenic	inversion	upstream	upstream	3	3	0	540	32	high	.	.	duplicates(3)	.	.	.	.
MCF-7 (SRR534294)	validated	RPS6KB1	DIAPH3	+/+	-/-	17:58007535	13:60318934	splice-site	intron	translocation	downstream	downstream	4	0	2	2338	15	high	.	.	duplicates(2)	.	.	.	.
MCF-7 (SRR534294)	non-validated	ADAT1	TERF2IP	-/-	+/-	16:75642122	16:75716770	splice-site	intron	duplication/5'-5'	upstream	downstream	1	1	4	74	4	high	.	.	duplicates(2)	.	.	.	.
MCF-7 (SRR534294)	validated	SYTL2	PICALM	-/-	-/-	11:85468668	11:85685855	splice-site	splice-site	duplication	upstream	downstream	2	2	2	1802	1523	high	.	.	duplicates(1)	.	.	.	.
MCF-7 (SRR534294)	non-validated	TTLL4	PLCD4	+/+	+/+	2:219614869	2:219480430	splice-site	splice-site	duplication	downstream	upstream	0	3	2	292	25	high	.	.	duplicates(2)	.	.	.	.
MCF-7 (SRR534294)	duplicate	TTLL4	PLCD4	+/+	+/+	2:219615502	2:219476846	intron	intron	duplication	downstream	upstream	0	2	4	4	9	medium	.	.	duplicates(3)	.	.	.	.
MCF-7 (SRR534294)	confirmed_by_structural_variant	LINC00894	FAM133A(41425),RP1-60G11.1(23212)	+/+	./+	X:149129167	X:93008698	splice-site	intergenic	duplication	downstream	upstream	3	1	1	239	5	high	.	.	duplicates(2)	.	.	.	.
MCF-7 (SRR534294)	confirmed_by_structural_variant	ZBTB38(4739),KRT18P35(16103)	IFT122	./-	+/+	3:141173373	3:129231155	intergenic	splice-site	inversion	upstream	upstream	2	1	2	130	1180	high	.	.	.	.	.	.	.
MCF-7 (SRR534294)	confirmed_by_structural_variant	TBL1XR1	RGS17(25356),RNA5SP224(2615)	-/-	./-	3:176914909	6:153477740	splice-site	intergenic	translocation	upstream	downstream	2	2	1	77	35	high	.	.	duplicates(3),mismatches(1)	.	.	.	.
MCF-7 (SRR534294)	non-validated	CTD-2319I12.4	TANC2	-/-	+/+	17:58212117	17:61176536	splice-site	splice-site	inversion	upstream	upstream	2	1	2	208	485	high	.	.	duplicates(1)	.	.	.	.
MCF-7 (SRR534294)	duplicate	CTD-2319I12.4	TANC2	-/-	+/+	17:58209797	17:61176536	splice-site	splice-site	inversion	upstream	upstream	0	3	2	262	485	high	.	.	duplicates(1)	.	.	.	.
MCF-7 (SRR534294)	confirmed_by_structural_variant	RP11-116O18.3	RP11-618K16.4(12223),SIGLEC15(24622)	-/-	./-	18:43317431	18:43380855	splice-site	intergenic	duplication	upstream	downstream	1	1	3	13	6	high	.	.	duplicates(4)	.	.	.	.
MCF-7 (SRR534294)	non-validated	RP11-15E18.1	LPPR5	+/+	-/-	17:58603862	1:99470179	splice-site	CDS	translocation	downstream	downstream	4	0	1	956	11	high	.	.	duplicates(2)	.	.	.	.
MCF-7 (SRR534294)	duplicate	RP11-15E18.1	LPPR5	+/+	-/-	17:58603862	1:99422297	splice-site	splice-site	translocation	downstream	downstream	1	0	0	956	8	low	.	.	duplicates(1)	.	.	.	.
MCF-7 (SRR534294)	duplicate	RP11-15E18.1	RP5-896L10.1	+/+	+/-	17:58603862	1:99470179	splice-site	exon	translocation/5'-5'	downstream	downstream	4	0	1	956	11	high	.	.	duplicates(2)	.	.	.	.
MCF-7 (SRR534294)	confirmed_by_structural_variant	SARNP	MMP19(26623),OLA1P3(459)	-/-	./-	12:56194638	12:56263373	splice-site	intergenic	duplication	upstream	downstream	4	1	0	810	30	high	.	.	mismappers(1)	.	.	.	.
MCF-7 (SRR534294)	non-validated	ANO6	RP11-267D19.1(30538),AC026357.1(17433)	+/+	./-	12:45725206	12:33177226	splice-site	intergenic	inversion	downstream	downstream	2	2	0	95	16	high	.	.	duplicates(3)	.	.	.	.
MCF-7 (SRR534294)	non-validated	PREX1	RP1-148H17.1(44376),RPL35AP(21511)	-/-	./-	20:47292731	20:46085447	splice-site	intergenic	deletion	upstream	downstream	0	3	1	558	13	high	.	.	mismappers(2)	.	.	.	.
MCF-7 (SRR534294)	non-validated	GIGYF2	EIF4E2	+/+	+/+	2:233568199	2:233445614	splice-site	splice-site	duplication	downstream	upstream	1	2	1	91	82	high	.	.	duplicates(3)	.	.	.	.
MCF-7 (SRR534294)	duplicate	GIGYF2	EIF4E2	+/+	+/+	2:233579181	2:233437294	intron	intron	duplication	downstream	upstream	0	1	2	3	12	medium	.	.	duplicates(2),mismappers(1)	.	.	.	.
MCF-7 (SRR534294)	non-validated	NPEPPS	EFCAB13	+/+	+/+	17:45682918	17:45490139	splice-site	splice-site	duplication	downstream	upstream	2	1	1	798	25	high	.	.	duplicates(2)	.	.	.	.
MCF-7 (SRR534294)	validated	VAV3	AP4B1-AS1	-/-	+/+	1:108138834	1:114442494	splice-site	splice-site	inversion	upstream	upstream	1	2	1	263	238	high	.	.	duplicates(1)	.	.	.	.
MCF-7 (SRR534294)	non-validated	WNK2	C9orf89	+/+	+/+	9:96010116	9:95869956	splice-site	splice-site	duplication	downstream	upstream	0	1	3	23	581	high	.	.	duplicates(1)	.	.	.	.
MCF-7 (SRR534294)	non-validated	DNAJB6	UBE3C	+/+	+/+	7:157160177	7:157023774	splice-site	splice-site	duplication	downstream	upstream	4	0	0	490	181	high	.	.	duplicates(1)	.	.	.	.
MCF-7 (SRR534294)	duplicate	DNAJB6	UBE3C	+/+	+/+	7:157161636	7:157023774	splice-site	splice-site	duplication	downstream	upstream	1	0	0	61	181	medium	.	.	.	.	.	.	.
MCF-7 (SRR534294)	non-validated	EIF3H	RAD21	-/-	-/-	8:117738255	8:117879000	splice-site	splice-site	duplication	upstream	downstream	2	2	0	662	170	high	.	.	duplicates(2)	.	.	.	.
MCF-7 (SRR534294)	validated	DEPDC1B	ELOVL7	-/-	-/-	5:59934577	5:60053472	splice-site	splice-site	duplication	upstream	downstream	1	2	1	83	58	high	.	.	.	.	.	.	.
MCF-7 (SRR534294)	non-validated	TPD52L2	TANC2	+/+	+/+	20:62500794	17:61086898	splice-site	5'UTR	translocation	downstream	upstream	2	2	0	1274	1764	high	.	.	duplicates(1)	.	.	.	.
MCF-7 (SRR534294)	confirmed_by_structural_variant	SMARCC1	EMCN	-/-	-/-	3:47779519	4:101505123	splice-site	splice-site	translocation	upstream	downstream	0	3	0	126	19	high	.	.	duplicates(5),mismappers(7)	.	.	.	.
MCF-7 (SRR534294)	duplicate	SMARCC1	EMCN	-/-	-/-	3:47779519	4:101401196	splice-site	splice-site	translocation	upstream	downstream	1	0	0	126	68	medium	.	.	duplicates(1)	.	.	.	.
MCF-7 (SRR534294)	duplicate	SMARCC1	EMCN	-/-	-/-	3:47779519	4:101491482	splice-site	splice-site	translocation	upstream	downstream	0	0	0	126	58	medium	.	.	duplicates(5),mismappers(19)	.	.	.	.
MCF-7 (SRR534294)	non-validated	SEMA4D	ABCA1	-/-	-/+	9:92070803	9:107627144	splice-site	intron	inversion/5'-5'	upstream	upstream	2	1	0	18	4	high	.	.	duplicates(2)	.	.	.	.
MCF-7 (SRR534294)	validated	NAV1	GPR37L1	+/+	+/+	1:201687883	1:202096869	splice-site	splice-site	deletion	downstream	upstream	3	0	0	53	356	high	.	.	.	.	.	.	.
MCF-7 (SRR534294)	duplicate	NAV1	GPR37L1	+/+	+/+	1:201709204	1:202096869	splice-site	splice-site	deletion/read-through	downstream	upstream	7	2	11	116	356	medium	.	.	duplicates(6)	.	.	.	.
MCF-7 (SRR534294)	duplicate	NAV1	GPR37L1	+/+	+/+	1:201708972	1:202096869	splice-site	splice-site	deletion/read-through	downstream	upstream	1	0	0	21	356	low	.	.	.	.	.	.	.
MCF-7 (SRR534294)	non-validated	ABCA1	KIAA1324	-/-	+/+	9:107620803	1:109737043	splice-site	splice-site	translocation	upstream	upstream	1	1	1	21	423	high	.	.	duplicates(5)	.	.	.	.
MCF-7 (SRR534294)	duplicate	ABCA1	KIAA1324	-/-	+/+	9:107617422	1:109737043	intron	splice-site	translocation	upstream	upstream	0	1	1	4	423	high	.	.	duplicates(3),mismappers(2)	.	.	.	.
MCF-7 (SRR534294)	non-validated	UBE2E2	RP11-20B7.1	+/+	+/+	3:23258803	3:73918927	splice-site	splice-site	deletion	downstream	upstream	1	2	0	22	17	high	.	.	duplicates(1)	.	.	.	.
MCF-7 (SRR534294)	confirmed_by_structural_variant	ATP1A1	RN7SL603P(109788),ZFP64(1042)	+/+	./-	1:116939356	20:50667160	splice-site	intergenic	translocation	downstream	downstream	1	1	1	1872	41	high	.	.	duplicates(1)	.	.	.	.
MCF-7 (SRR534294)	non-validated	ATP1A1	RP11-323A7.1(133404),RP11-470F18.1(43273)	+/+	./+	1:116939356	9:78151312	splice-site	intergenic	translocation	downstream	upstream	1	1	1	1872	7	high	.	.	.	.	.	.	.
MCF-7 (SRR534294)	non-validated	ATP1A1	RP11-470F18.1	+/+	+/+	1:116939356	9:78203277	splice-site	exon	translocation	downstream	upstream	2	0	1	1872	3	high	.	.	duplicates(3)	.	.	.	.
MCF-7 (SRR534294)	non-validated	TLE1	RP11-289F5.1(50239),RPS20P25(488745)	-/-	./+	9:84302249	9:83536449	splice-site	intergenic	inversion	upstream	upstream	1	0	2	293	18	high	.	.	duplicates(1)	.	.	.	.
MCF-7 (SRR534294)	non-validated	MACROD2	C14orf132	+/+	+/+	20:15210707	14:96552848	splice-site	splice-site	translocation	downstream	upstream	0	2	1	8	22	high	.	.	duplicates(2)	.	.	.	.
MCF-7 (SRR534294)	non-validated	AFF4	HSPA4	-/-	+/-	5:132227856	5:132400909	splice-site	intron	duplication/5'-5'	upstream	downstream	1	2	0	93	11	high	.	.	duplicates(2)	.	.	.	.
MCF-7 (SRR534294)	confirmed_by_structural_variant	MTAP	CDKN2A	+/+	-/+	9:21819535	9:21989620	intron	exon	deletion/read-through/5'-5'	downstream	upstream	17	48	52	332	288	medium	.	.	duplicates(105),mismappers(11),mismatches(12)	.	.	.	.
MCF-7 (SRR534294)	confirmed_by_structural_variant	MTG2	NFATC2(6625),ATP9A(27058)	+/-	./+	20:60776853	20:50185995	3'UTR	intergenic	inversion	upstream	upstream	21	19	40	363	101	medium	.	.	duplicates(49)	.	.	.	.
MCF-7 (SRR534294)	validated	C19orf60	TMEM59L	+/+	+/+	19:18699887	19:18724682	splice-site	splice-site	deletion/read-through	downstream	upstream	3	3	43	4733	139	medium	.	.	duplicates(22)	.	.	.	.
MCF-7 (SRR534294)	duplicate	C19orf60	TMEM59L	+/+	+/+	19:18699710	19:18724682	splice-site	splice-site	deletion/read-through	downstream	upstream	0	31	17	6258	139	medium	.	.	duplicates(28),low_entropy(4)	.	.	.	.
MCF-7 (SRR534294)	duplicate	C19orf60	TMEM59L	+/+	+/+	19:18701743	19:18723661	splice-site	splice-site	deletion/read-through	downstream	upstream	0	0	0	8866	41	low	.	.	low_entropy(1)	.	.	.	.
MCF-7 (SRR534294)	validated	MTAP	CDKN2B-AS1	+/+	+/+	9:21818201	9:22092307	splice-site	splice-site	deletion/read-through	downstream	upstream	7	10	26	311	76	medium	.	.	duplicates(26)	.	.	.	.
MCF-7 (SRR534294)	duplicate	MTAP	CDKN2B-AS1	+/+	+/+	9:21818201	9:22046750	splice-site	splice-site	deletion/read-through	downstream	upstream	0	3	33	311	51	medium	.	.	duplicates(20)	.	.	.	.
MCF-7 (SRR534294)	duplicate	MTAP	CDKN2B-AS1	+/+	+/+	9:21818201	9:22029432	splice-site	splice-site	deletion/read-through	downstream	upstream	0	2	33	311	15	medium	.	.	duplicates(18)	.	.	.	.
MCF-7 (SRR534294)	duplicate	MTAP	CDKN2B-AS1	+/+	+/+	9:21818201	9:21995047	splice-site	splice-site	deletion/read-through	downstream	upstream	1	0	33	311	36	medium	.	.	duplicates(18)	.	.	.	.
MCF-7 (SRR534294)	duplicate	MTAP	CDKN2B-AS1	+/+	+/+	9:21818201	9:22112319	splice-site	splice-site	deletion/read-through	downstream	upstream	20	7	5	311	279	medium	.	.	duplicates(15)	.	.	.	.
MCF-7 (SRR534294)	duplicate	MTAP	CDKN2B-AS1	+/+	+/+	9:21818201	9:22096371	splice-site	splice-site	deletion/read-through	downstream	upstream	7	8	15	311	153	medium	.	.	duplicates(21)	.	.	.	.
MCF-7 (SRR534294)	duplicate	MTAP	CDKN2B-AS1	+/+	+/+	9:21818201	9:22097257	splice-site	splice-site	deletion/read-through	downstream	upstream	9	10	6	311	269	medium	.	.	duplicates(12)	.	.	.	.
MCF-7 (SRR534294)	duplicate	MTAP	CDKN2B-AS1	+/+	+/+	9:21818201	9:22120503	splice-site	splice-site	deletion/read-through	downstream	upstream	0	1	0	311	720	low	.	.	.	.	.	.	.
MCF-7 (SRR534294)	confirmed_by_structural_variant	NCOA3	RP5-947P14.1(446438),RP11-478L17.1(13405)	+/+	./+	20:46135148	1:107073559	intron	intergenic	translocation	downstream	upstream	2	10	26	164	46	medium	.	.	duplicates(17),mismappers(37),mismatches(1)	.	.	.	.
MCF-7 (SRR534294)	confirmed_by_structural_variant	PRPF18	BEND7	+/+	-/+	10:13655251	10:13532361	intron	intron	duplication/5'-5'	downstream	upstream	3	6	26	17	29	medium	.	.	duplicates(9)	.	.	.	.
MCF-7 (SRR534294)	duplicate	RP11-295P9.3	BEND7	+/+	-/+	10:13655251	10:13532361	intron	intron	duplication/5'-5'	downstream	upstream	3	6	26	17	29	medium	.	.	duplicates(9)	.	.	.	.
MCF-7 (SRR534294)	confirmed_by_structural_variant	ZBTB25	RP11-973N13.2	-/-	-/-	14:64952683	14:65067081	3'UTR	exon	duplication	upstream	downstream	7	22	3	53	44	medium	.	.	duplicates(10)	.	.	.	.
MCF-7 (SRR534294)	confirmed_by_structural_variant	FBRSL1	MUC8(209),FBRSL1(15202)	+/+	./+	12:133118878	12:133050935	intron	intergenic	duplication	downstream	upstream	6	5	13	31	19	medium	.	.	duplicates(11)	.	.	.	.
MCF-7 (SRR534294)	validated	GRN	ATXN7L3	+/-	-/-	17:42430179	17:42273806	3'UTR	intron	deletion/read-through/3'-3'	upstream	downstream	15	5	1	1452	54	medium	.	.	duplicates(12),low_entropy(1),mismatches(1)	.	.	.	.
MCF-7 (SRR534294)	non-validated	MYH9	CTD-2081K17.2(92509),UQCRFS1(100802)	-/-	./-	22:36708347	19:29597371	intron	intergenic	translocation	upstream	downstream	1	1	13	25	11	medium	.	.	duplicates(7)	.	.	.	.
MCF-7 (SRR534294)	confirmed_by_structural_variant	TDRKH	PRICKLE2	-/-	-/-	1:151745806	3:64319054	intron	intron	translocation	upstream	downstream	3	8	3	32	16	medium	.	.	duplicates(1)	.	.	.	.
MCF-7 (SRR534294)	duplicate	GSN-AS1	SMIM22	-/+	+/+	9:124045673	16:4844956	exon	5'UTR	translocation/3'-3'	downstream	upstream	1	0	9	33	161	medium	.	.	duplicates(4),mismappers(3)	.	.	.	.
MCF-7 (SRR534294)	non-validated	RBM19	RBM19	-/-	-/-	12:114256050	12:114260004	intron	3'UTR	duplication	upstream	downstream	0	4	6	120	211	medium	.	.	duplicates(4),mismatches(1)	.	.	.	.
MCF-7 (SRR534294)	non-validated	ANKRD34A	RNVU1-6(6833),HFE2(23342)	+/+	./+	1:145473374	1:145389753	CDS	intergenic	duplication	downstream	upstream	2	5	1	145	7	medium	.	.	duplicates(2)	.	.	.	.
MCF-7 (SRR534294)	non-validated	RGS3	BRD3	+/+	-/+	9:116234021	9:136897459	intron	3'UTR	deletion/5'-5'	downstream	upstream	0	0	7	18	49	medium	.	.	duplicates(2)	.	.	.	.
MCF-7 (SRR534294)	non-validated	RECQL4	SOS1	-/-	-/-	8:145736682	2:39269883	3'UTR	intron	translocation	upstream	downstream	7	0	0	1596	9	medium	.	.	.	.	.	.	.
MCF-7 (SRR534294)	non-validated	MOV10	MOV10	+/+	+/+	1:113236619	1:113235552	exon	intron	duplication	downstream	upstream	0	3	4	297	302	medium	.	.	duplicates(7)	.	.	.	.
MCF-7 (SRR534294)	non-validated	PMAIP1	PMAIP1	+/+	+/+	18:57570140	18:57569567	3'UTR	intron	duplication	downstream	upstream	2	3	1	97	97	medium	.	.	duplicates(4)	.	.	.	.
MCF-7 (SRR534294)	non-validated	NCOA3	ZNF217	+/+	-/+	20:46267231	20:52211559	intron	intron	deletion/5'-5'	downstream	upstream	0	4	2	273	49	medium	.	.	duplicates(11),low_entropy(5),mismappers(8)	.	.	.	.
MCF-7 (SRR534294)	non-validated	TIMM50	SAMD4B	+/+	+/+	19:39972028	19:39860467	intron	CDS	duplication	downstream	upstream	0	0	6	34	520	medium	.	.	duplicates(4)	.	.	.	.
MCF-7 (SRR534294)	confirmed_by_structural_variant	NAV1	RP11-510N19.3(26398),CRIP1P3(30427)	+/+	./+	1:201709204	1:202035460	splice-site	intergenic	deletion/read-through	downstream	upstream	2	0	3	116	88	medium	.	.	duplicates(9),mismappers(14)	.	.	.	.
MCF-7 (SRR534294)	non-validated	BZW1	BZW1	+/+	+/+	2:201685884	2:201684844	intron	exon	duplication	downstream	upstream	1	4	0	148	173	medium	.	.	duplicates(1)	.	.	.	.
MCF-7 (SRR534294)	duplicate	RP11-762I7.5	MMP19(26623),OLA1P3(459)	-/-	./-	12:56194638	12:56263373	splice-site	intergenic	duplication	upstream	downstream	4	1	0	810	30	medium	.	.	mismappers(1)	.	.	.	.
MCF-7 (SRR534294)	confirmed_by_structural_variant	SARNP	MMP19	-/-	-/-	12:56194638	12:56236222	splice-site	splice-site	duplication	upstream	downstream	5	0	0	810	167	medium	.	.	duplicates(1),mismatches(1)	.	.	.	.
MCF-7 (SRR534294)	duplicate	SARNP	MMP19	-/-	-/-	12:56197413	12:56236222	splice-site	splice-site	duplication	upstream	downstream	1	0	0	615	167	medium	.	.	.	.	.	.	.
MCF-7 (SRR534294)	duplicate	RP11-762I7.5	MMP19	-/-	-/-	12:56194638	12:56236222	splice-site	splice-site	duplication	upstream	downstream	5	0	0	810	167	medium	.	.	duplicates(1),mismatches(1)	.	.	.	.
MCF-7 (SRR534294)	duplicate	RP11-762I7.5	MMP19	-/-	-/-	12:56197413	12:56236222	splice-site	splice-site	duplication	upstream	downstream	1	0	0	615	167	medium	.	.	.	.	.	.	.
MCF-7 (SRR534294)	confirmed_by_structural_variant	DMRT2	RPS27AP14(46898),RP11-459D20.1(116899)	+/+	./-	9:1050998	9:1211765	intron	intergenic	inversion	downstream	downstream	0	1	3	5	2	medium	.	.	duplicates(1)	.	.	.	.
MCF-7 (SRR534294)	non-validated	PRPF3	CTD-2666L21.1	+/+	+/-	1:150325657	19:12317015	3'UTR	intron	translocation/5'-5'	downstream	downstream	4	0	0	1964	0	medium	.	.	mismappers(4)	.	.	.	.
MCF-7 (SRR534294)	non-validated	CCDC101	SEC22B	+/+	+/+	16:28565395	1:145042488	5'UTR	5'UTR	translocation	downstream	upstream	0	0	4	322	8	medium	.	.	duplicates(1)	.	.	.	.
MCF-7 (SRR534294)	confirmed_by_structural_variant	SYNPR(28594),SNTN(7153)	AMPD1	./-	-/-	3:63631191	1:115231362	intergenic	splice-site	translocation	upstream	downstream	0	3	0	1	6	medium	.	.	duplicates(3)	.	.	.	.
MCF-7 (SRR534294)	non-validated	CTD-2587M2.1	CTD-2587M2.1	-/-	-/-	5:108655286	5:108660242	intron	exon	duplication	upstream	downstream	1	1	1	7	19	medium	.	.	duplicates(2)	.	.	.	.
MCF-7 (SRR534294)	non-validated	SATB2	RP11-261P9.4	-/-	+/+	2:200322285	20:57286183	5'UTR	intron	translocation	upstream	upstream	0	3	0	80	52	medium	.	.	duplicates(3),mismappers(1),mismatches(2)	.	.	.	.
MCF-7 (SRR534294)	non-validated	RP11-379F4.4	RP11-379F4.4	+/+	+/+	3:158455633	3:158450862	exon	intron	duplication	downstream	upstream	1	2	0	6	6	medium	.	.	.	.	.	.	.
MCF-7 (SRR534294)	duplicate	UNK	ABCA5	+/+	-/-	17:73816189	17:67324911	splice-site	intron	inversion	downstream	downstream	0	3	0	543	140	medium	.	.	duplicates(2),low_entropy(1),mismappers(2)	.	.	.	.
MCF-7 (SRR534294)	non-validated	TBCK	TBCK	-/-	-/-	4:107035765	4:107133992	intron	splice-site	duplication	upstream	downstream	0	3	0	0	176	medium	.	.	.	.	.	.	.
MCF-7 (SRR534294)	non-validated	MTRF1	MTRF1	-/-	-/-	13:41835074	13:41835772	intron	exon	duplication	upstream	downstream	3	0	0	121	139	medium	.	.	duplicates(1)	.	.	.	.
MCF-7 (SRR534294)	non-validated	RBM17	RBM17	+/+	+/+	10:6154588	10:6148104	intron	splice-site	duplication	downstream	upstream	1	1	1	1112	1145	medium	.	.	duplicates(1)	.	.	.	.
MCF-7 (SRR534294)	duplicate	RP11-379F4.4	MFSD1	+/+	+/+	3:158455633	3:158450862	exon	intron	duplication	downstream	upstream	1	2	0	6	6	medium	.	.	.	.	.	.	.
MCF-7 (SRR534294)	non-validated	RP11-638I2.6	RP11-769O8.2	+/-	+/-	14:100757466	18:738068	exon	exon	translocation	upstream	downstream	3	0	0	2105	16	medium	.	.	.	.	.	.	.
MCF-7 (SRR534294)	confirmed_by_structural_variant	RSBN1	DCLRE1B	-/-	+/+	1:114354332	1:114448091	splice-site	5'UTR	inversion	upstream	upstream	1	1	1	295	343	medium	.	.	.	.	.	.	.
MCF-7 (SRR534294)	confirmed_by_structural_variant	RASAL2	OR10K2(11500),OR10T1P(12702)	+/+	./-	1:178063829	1:158402156	splice-site	intergenic	inversion	downstream	downstream	0	0	2	33	11	medium	.	.	mismappers(3)	.	.	.	.
MCF-7 (SRR534294)	validated	UBE2V1	TBX2	-/-	+/+	20:48729644	17:59481782	splice-site	splice-site	translocation	upstream	upstream	0	2	0	713	11188	medium	.	.	duplicates(1)	.	.	.	.
MCF-7 (SRR534294)	duplicate	UBE2V1	TBX2	-/-	+/+	20:48732022	17:59481782	splice-site	splice-site	translocation	upstream	upstream	0	1	0	43	11188	medium	.	.	duplicates(1)	.	.	.	.
MCF-7 (SRR534294)	non-validated	ACTN4	EIF3K	+/+	+/+	19:39208714	19:39127529	splice-site	splice-site	duplication	downstream	upstream	2	0	0	3435	376	medium	.	.	duplicates(1)	.	.	.	.
MCF-7 (SRR534294)	non-validated	TRIM37	TRIM37	-/-	-/-	17:57153008	17:57181755	splice-site	splice-site	duplication/non-canonical_splicing	upstream	downstream	3	9	5	2147	1680	low	.	.	duplicates(11)	.	.	.	.
MCF-7 (SRR534294)	non-validated	NPDC1	NPDC1	-/-	-/-	9:139939005	9:139940541	intron	5'UTR	duplication	upstream	downstream	3	10	4	3526	2583	low	.	.	duplicates(4)	.	.	.	.
MCF-7 (SRR534294)	confirmed_by_structural_variant	DYNC1H1	DYNC1H1	+/+	+/+	14:102500789	14:102466326	splice-site	splice-site	duplication/non-canonical_splicing	downstream	upstream	3	5	6	362	105	low	.	.	duplicates(13)	.	.	.	.
MCF-7 (SRR534294)	non-validated	NANP	NINL	-/-	-/-	20:25604512	20:25507236	CDS	intron	deletion/read-through	upstream	downstream	0	0	11	52	198	low	.	.	duplicates(9)	.	.	.	.
MCF-7 (SRR534294)	confirmed_by_structural_variant	ARFGEF1	ARFGEF1	-/-	-/-	8:68139682	8:68152525	splice-site	splice-site	duplication/non-canonical_splicing	upstream	downstream	3	7	0	97	71	low	.	.	duplicates(1)	.	.	.	.
MCF-7 (SRR534294)	confirmed_by_structural_variant	GRHL2	KB-1562D12.1	+/+	-/+	8:102505017	8:102487410	splice-site	intron	duplication/5'-5'	downstream	upstream	2	6	2	258	128	low	.	.	duplicates(6)	.	.	.	.
MCF-7 (SRR534294)	duplicate	KB-1562D12.1	GRHL2	-/+	+/+	8:102487630	8:102555469	intron	splice-site	deletion/read-through/3'-3'	downstream	upstream	3	1	3	109	328	low	.	.	duplicates(7)	.	.	.	.
MCF-7 (SRR534294)	confirmed_by_structural_variant	DDHD1	AL163953.3	-/-	+/-	14:53607747	14:53711658	intron	intron	duplication/5'-5'	upstream	downstream	1	4	4	19	15	low	.	.	duplicates(4),mismappers(1)	.	.	.	.
MCF-7 (SRR534294)	confirmed_by_structural_variant	SLC2A13	SLC2A13	-/-	-/-	12:40158262	12:40224282	splice-site	splice-site	duplication/non-canonical_splicing	upstream	downstream	2	4	1	83	38	low	.	.	duplicates(5)	.	.	.	.
MCF-7 (SRR534294)	validated	C16orf62	IQCK	+/+	+/+	16:19603196	16:19867809	splice-site	splice-site	deletion/read-through	downstream	upstream	2	4	1	120	111	low	.	.	duplicates(1)	.	.	.	.
MCF-7 (SRR534294)	non-validated	BRIP1	NACA2(26606),BRIP1(63458)	-/-	./-	17:59770791	17:59695169	splice-site	intergenic	deletion/read-through	upstream	downstream	3	2	1	1663	13	low	.	.	duplicates(1)	.	.	.	.
MCF-7 (SRR534294)	non-validated	TMEM105(14942),RP11-1055B8.2(16656)	TMEM105	./-	-/-	17:79319416	17:79288281	intergenic	splice-site	deletion/read-through	upstream	downstream	0	3	2	110	62	low	.	.	duplicates(3)	.	.	.	.
MCF-7 (SRR534294)	non-validated	PSMD9	PSMD9	+/+	+/+	12:122352350	12:122351921	exon	intron	duplication	downstream	upstream	0	3	2	15	25	low	.	.	duplicates(2)	.	.	.	.
MCF-7 (SRR534294)	non-validated	RP1-154J13.3(8776),OR13H1(42314)	IGSF1	./-	-/-	X:130635636	X:130523122	intergenic	splice-site	deletion/read-through	upstream	downstream	2	1	1	31	44	low	.	.	duplicates(2)	.	.	.	.
MCF-7 (SRR534294)	non-validated	LDOC1	SPANXB1(90592),RNU6-3P(23747)	-/-	./-	X:140271078	X:140188468	splice-site	intergenic	deletion/read-through	upstream	downstream	1	0	3	558	1	low	.	.	duplicates(3),mismatches(1)	.	.	.	.
MCF-7 (SRR534294)	non-validated	GPR137	RP11-783K16.10	+/+	+/+	11:64038133	11:64068129	splice-site	splice-site	deletion/read-through	downstream	upstream	0	2	2	93	31	low	.	.	duplicates(9)	.	.	.	.
MCF-7 (SRR534294)	duplicate	GPR137	TEX40	+/+	+/+	11:64038133	11:64068129	splice-site	splice-site	deletion/read-through	downstream	upstream	0	2	2	93	31	low	.	.	duplicates(9)	.	.	.	.
MCF-7 (SRR534294)	confirmed_by_structural_variant	AC136289.1	ATXN7	-/+	+/+	3:63741639	3:63977734	intron	intron	deletion/read-through/3'-3'	downstream	upstream	0	2	2	5	23	low	.	.	duplicates(2)	.	.	.	.
MCF-7 (SRR534294)	non-validated	BCAS4	RP5-1010E17.2	+/+	-/-	20:49411710	20:54040148	splice-site	splice-site	inversion	downstream	downstream	0	1	3	727	4	low	.	.	duplicates(1)	.	.	.	.
MCF-7 (SRR534294)	non-validated	SLC5A4P1(14598),OR8D1(20633)	OR8A1	./+	+/+	11:124159075	11:124439997	intergenic	CDS	deletion/read-through	downstream	upstream	1	1	1	18	10	low	.	.	.	.	.	.	.
MCF-7 (SRR534294)	confirmed_by_structural_variant	DENND2C	RP4-543J13.1	-/-	-/-	1:115142825	1:114770970	splice-site	intron	deletion/read-through	upstream	downstream	2	1	0	36	4	low	.	.	.	.	.	.	.
MCF-7 (SRR534294)	non-validated	MRPL23	H19(9713),IGF2(117929)	+/+	./+	11:1993959	11:2032413	CDS	intergenic	deletion/read-through	downstream	upstream	0	0	3	23	4	low	.	.	duplicates(1)	.	.	.	.
MCF-7 (SRR534294)	non-validated	GPR37L1	PTPN7	+/+	-/+	1:202097612	1:202121422	CDS	intron	deletion/read-through/5'-5'	downstream	upstream	2	0	1	202	18	low	.	.	duplicates(1),mismappers(1)	.	.	.	.
MCF-7 (SRR534294)	non-validated	ORMDL1	OSGEPL1	-/-	-/-	2:190640291	2:190617705	splice-site	splice-site	deletion/read-through	upstream	downstream	2	1	0	1546	334	low	.	.	duplicates(2)	.	.	.	.
MCF-7 (SRR534294)	non-validated	SRRT	PER3	+/+	+/-	7:100486279	1:7892453	splice-site	intron	translocation/5'-5'	downstream	downstream	3	0	0	1873	2	low	.	.	.	.	.	.	.
MCF-7 (SRR534294)	confirmed_by_structural_variant	DHX30	RP11-588P8.1(165044),EMCN(14792)	+/+	./+	3:47866615	4:101301706	CDS	intergenic	translocation	downstream	upstream	2	1	0	198	2	low	.	.	duplicates(1)	.	.	.	.
MCF-7 (SRR534294)	non-validated	FAM49B	ASAP1	-/-	-/-	8:130983189	8:131140336	splice-site	splice-site	duplication	upstream	downstream	0	1	2	158	158	low	.	.	duplicates(1)	.	.	.	.
MCF-7 (SRR534294)	confirmed_by_structural_variant	AC005037.3	NIF3L1	+/+	+/+	2:201828353	2:201757969	splice-site	splice-site	duplication	downstream	upstream	2	0	1	144	494	low	.	.	duplicates(1)	.	.	.	.
MCF-7 (SRR534294)	non-validated	HIF1A	RP11-47I22.3	+/+	+/+	14:62205091	14:62117680	splice-site	splice-site	duplication	downstream	upstream	0	2	1	313	20	low	.	.	duplicates(9)	.	.	.	.
MCF-7 (SRR534294)	non-validated	DTX2P1-UPK3BP1-PMS2P11	CCDC146	+/+	+/+	7:76648292	7:76796975	exon	5'UTR	deletion/read-through	downstream	upstream	0	0	2	108	14	low	.	.	duplicates(3),mismappers(3)	.	.	.	.
MCF-7 (SRR534294)	duplicate	DTX2P1	CCDC146	+/+	+/+	7:76648292	7:76796975	exon	5'UTR	deletion/read-through	downstream	upstream	0	0	2	108	14	low	.	.	duplicates(3),mismappers(3)	.	.	.	.
MCF-7 (SRR534294)	non-validated	DPY19L2P2	PMPCB	-/+	+/+	7:102885141	7:102939015	intron	splice-site	deletion/read-through/3'-3'	downstream	upstream	0	2	0	11	1415	low	.	.	low_entropy(1),mismappers(1)	.	.	.	.
MCF-7 (SRR534294)	non-validated	NFATC2	IGSF3	-/-	-/-	20:50090517	1:117159079	splice-site	splice-site	translocation	upstream	downstream	0	1	1	48	143	low	.	.	.	.	.	.	.
MCF-7 (SRR534294)	confirmed_by_structural_variant	ARHGAP10	EDNRA	+/+	+/+	4:148944564	4:148441003	splice-site	splice-site	duplication	downstream	upstream	1	1	0	89	14	low	.	.	duplicates(3),low_entropy(1)	.	.	.	.
MCF-7 (SRR534294)	non-validated	ZNF205-AS1	ZNF200	-/-	-/-	16:3164969	16:3274613	splice-site	splice-site	duplication	upstream	downstream	0	2	0	6	48	low	.	.	.	.	.	.	.
MCF-7 (SRR534294)	validated	SGPP2	ULK4	+/+	-/-	2:223339445	3:41291065	splice-site	splice-site	translocation	downstream	downstream	1	1	0	8	10	low	.	.	duplicates(2)	.	.	.	.
MCF-7 (SRR534294)	non-validated	ATXN7	BCAS1	+/+	-/-	3:63898901	20:52612589	splice-site	splice-site	translocation	downstream	downstream	1	0	1	546	319	low	.	.	duplicates(1)	.	.	.	.
MCF-7 (SRR534294)	validated	SLC25A24	NBPF6	-/-	+/+	1:108703804	1:109013219	splice-site	splice-site	inversion	upstream	upstream	1	0	1	366	76	low	.	.	duplicates(1)	.	.	.	.
MCF-7 (SRR534294)	confirmed_by_structural_variant	ATP9A	RP11-347D21.2	-/-	+/+	20:50255882	20:46587007	splice-site	splice-site	inversion	upstream	upstream	2	0	0	540	482	low	.	.	duplicates(2)	.	.	.	.
MCF-7 (SRR534294)	confirmed_by_structural_variant	MYH9	EIF3D	-/-	-/-	22:36783852	22:36922178	splice-site	splice-site	duplication	upstream	downstream	1	0	1	80	221	low	.	.	duplicates(3)	.	.	.	.
MCF-7 (SRR534294)	non-validated	SDHAP3	IRX2	-/-	-/-	5:1574297	5:2749901	splice-site	splice-site	duplication	upstream	downstream	2	0	0	1758	821	low	.	.	.	.	.	.	.
MCF-7 (SRR534294)	validated	ZMYND8	USP32	-/-	-/-	20:45910846	17:58422969	splice-site	splice-site	translocation	upstream	downstream	1	1	0	423	512	low	.	.	.	.	.	.	.
MCF-7 (SRR534294)	non-validated	RP11-1407O15.2	GPR179	-/-	-/-	17:36398218	17:36493096	splice-site	splice-site	duplication	upstream	downstream	2	0	0	229	3	low	.	.	.	.	.	.	.
MCF-7 (SRR534294)	non-validated	D2HGDH	STK25	+/+	-/-	2:242695429	2:242441123	splice-site	splice-site	inversion	downstream	downstream	0	1	1	4033	1559	low	.	.	duplicates(5)	.	.	.	.
MCF-7 (SRR534294)	non-validated	ACAD9	RAB7A	+/+	+/+	3:128623348	3:128514203	splice-site	splice-site	duplication	downstream	upstream	0	1	1	1675	209	low	.	.	.	.	.	.	.
simulated 100x	validated	IL37	TACR1	+/+	-/-	2:113674825	2:75278442	splice-site	CDS	inversion	downstream	downstream	24	23	25	50	54	high	.	.	.	.	.	.	.
simulated 100x	validated	HOXD3	MSH6	+/+	+/+	2:177034326	2:48023033	CDS	splice-site	duplication	downstream	upstream	19	28	25	51	176	high	.	.	low_entropy(1)	.	.	.	.
simulated 100x	validated	PPIB	TM2D3	-/-	-/-	15:64448924	15:102190362	splice-site	splice-site	duplication	upstream	downstream	26	24	18	1358	101	high	.	.	low_entropy(1)	.	.	.	.
simulated 100x	validated	ACP5	FUZ	-/-	-/-	19:11688465	19:50314724	5'UTR	splice-site	duplication	upstream	downstream	26	27	14	64	117	high	.	.	mismatches(2)	.	.	.	.
simulated 100x	validated	GALP	BRINP3	+/+	-/-	19:56697144	1:190250880	3'UTR	splice-site	translocation	downstream	downstream	23	25	18	52	54	high	.	.	.	.	.	.	.
simulated 100x	validated	RASSF4	THAP8	+/+	-/-	10:45486525	19:36526494	CDS	splice-site	translocation	downstream	downstream	21	23	22	66	85	high	.	.	.	.	.	.	.
simulated 100x	validated	CTDSPL2	ADAL	+/+	+/+	15:44788656	15:43639214	splice-site	splice-site	duplication	downstream	upstream	25	20	20	100	78	high	.	.	inconsistently_clipped(1),mismatches(1)	.	.	.	.
simulated 100x	validated	INPP5E	CAMSAP1	-/-	-/-	9:139327607	9:138758382	splice-site	splice-site	deletion	upstream	downstream	22	14	28	28	93	high	.	.	.	.	.	.	.
simulated 100x	validated	RRAGB	UBA1	+/+	+/+	X:55777798	X:47070435	exon	splice-site	duplication	downstream	upstream	22	16	26	64	565	high	.	.	low_entropy(1)	.	.	.	.
simulated 100x	validated	GIGYF2	PCGF1	+/+	-/-	2:233625269	2:74732737	splice-site	splice-site	inversion	downstream	downstream	22	15	26	113	86	high	.	.	duplicates(1),mismatches(1)	.	.	.	.
simulated 100x	validated	GIMAP6	EPHA1	-/-	-/-	7:150324807	7:143092275	3'UTR	splice-site	deletion	upstream	downstream	19	22	21	69	246	high	.	.	duplicates(1),mismatches(2)	.	.	.	.
simulated 100x	validated	CYB561D1	PIGT	+/+	+/+	1:110036909	20:44048776	splice-site	splice-site	translocation	downstream	upstream	26	21	15	59	201	high	.	.	duplicates(1)	.	.	.	.
simulated 100x	validated	BOD1L1	GRPEL1	-/-	-/-	4:13610153	4:7069273	splice-site	exon	deletion	upstream	downstream	23	21	17	69	53	high	.	.	low_entropy(2)	.	.	.	.
simulated 100x	validated	UNC5CL	INO80E	-/-	+/+	6:40996291	16:30012735	CDS	splice-site	translocation	upstream	upstream	18	29	14	56	103	high	.	.	mismatches(1)	.	.	.	.
simulated 100x	validated	GPBP1	PPARGC1B	+/+	+/+	5:56531838	5:149227021	CDS	splice-site	deletion	downstream	upstream	23	18	20	152	82	high	.	.	duplicates(2)	.	.	.	.
simulated 100x	validated	MYBPHL	MIER1	-/-	+/+	1:109840044	1:67424534	splice-site	splice-site	inversion	upstream	upstream	16	25	19	66	94	high	.	.	low_entropy(2),mismatches(1)	.	.	.	.
simulated 100x	validated	KRT4	TAOK3	-/-	-/-	12:53201550	12:118650799	CDS	splice-site	duplication	upstream	downstream	25	19	15	60	54	high	.	.	.	.	.	.	.
simulated 100x	validated	GRIN1	DNLZ	+/+	-/-	9:140053169	9:139257580	exon	splice-site	inversion	downstream	downstream	25	23	11	59	89	high	.	.	duplicates(1)	.	.	.	.
simulated 100x	validated	TCTEX1D1	RFC5	+/+	+/+	1:67241987	12:118455800	CDS	splice-site	translocation	downstream	upstream	12	24	23	42	80	high	.	.	low_entropy(1)	.	.	.	.
simulated 100x	validated	MBNL3	G6PD	-/-	-/-	X:131524957	X:153762375	CDS	splice-site	duplication	upstream	downstream	22	25	12	62	164	high	.	.	.	.	.	.	.
simulated 100x	validated	SMARCC1	SH3RF3	-/-	+/+	3:47652037	2:109964131	exon	splice-site	translocation	upstream	upstream	17	19	23	53	51	high	.	.	low_entropy(1)	.	.	.	.
simulated 100x	validated	OCA2	TAC1	-/-	+/+	15:28326794	7:97364138	splice-site	splice-site	translocation	upstream	upstream	21	23	14	50	61	high	.	.	mismatches(1)	.	.	.	.
simulated 100x	non-validated	PHYHIPL	RP11-53M11.3	+/+	+/+	10:60937378	8:55471745	splice-site	exon	translocation	downstream	upstream	23	20	15	42	64	high	.	.	duplicates(1)	.	.	.	.
simulated 100x	validated	TSN	PDE9A	+/+	+/+	2:122513529	21:44188298	splice-site	splice-site	translocation	downstream	upstream	18	25	15	51	94	high	.	.	low_entropy(1)	.	.	.	.
simulated 100x	validated	CELF5	CYP4F8	+/+	+/+	19:3282265	19:15726427	splice-site	splice-site	deletion	downstream	upstream	22	15	21	75	56	high	.	.	duplicates(1)	.	.	.	.
simulated 100x	validated	SS18L1	AC138430.4	+/+	-/-	20:60749700	19:19373605	splice-site	exon	translocation	downstream	downstream	17	17	24	91	50	high	.	.	mismatches(1)	.	.	.	.
simulated 100x	duplicate	SS18L1	HAPLN4	+/+	-/-	20:60749700	19:19373605	splice-site	5'UTR	translocation	downstream	downstream	17	17	24	91	50	high	.	.	mismatches(1)	.	.	.	.
simulated 100x	validated	PSMD8	ICAM1	+/+	+/+	19:38866872	19:10394866	splice-site	CDS	duplication	downstream	upstream	16	18	23	413	76	high	.	.	low_entropy(1)	.	.	.	.
simulated 100x	validated	PPP5C	ARMC6	+/+	+/+	19:46888166	19:19165086	splice-site	CDS	duplication	downstream	upstream	27	17	13	240	163	high	.	.	duplicates(1),low_entropy(1)	.	.	.	.
simulated 100x	validated	YTHDF2	CHIA	+/+	+/+	1:29063659	1:111860608	splice-site	splice-site	deletion	downstream	upstream	28	20	9	200	69	high	.	.	.	.	.	.	.
simulated 100x	validated	UGT1A1	CDC42EP1	+/+	+/+	2:234675811	22:37960413	splice-site	5'UTR	translocation	downstream	upstream	28	12	16	50	47	high	.	.	duplicates(1)	.	.	.	.
simulated 100x	duplicate	UGT1A10	CDC42EP1	+/+	+/+	2:234675811	22:37960413	splice-site	5'UTR	translocation	downstream	upstream	28	12	16	50	47	high	.	.	duplicates(1)	.	.	.	.
simulated 100x	duplicate	UGT1A7	CDC42EP1	+/+	+/+	2:234675811	22:37960413	splice-site	5'UTR	translocation	downstream	upstream	28	12	16	50	47	high	.	.	duplicates(1)	.	.	.	.
simulated 100x	duplicate	UGT1A6	CDC42EP1	+/+	+/+	2:234675811	22:37960413	splice-site	5'UTR	translocation	downstream	upstream	28	12	16	50	47	high	.	.	duplicates(1)	.	.	.	.
simulated 100x	duplicate	UGT1A4	CDC42EP1	+/+	+/+	2:234675811	22:37960413	splice-site	5'UTR	translocation	downstream	upstream	28	12	16	50	47	high	.	.	duplicates(1)	.	.	.	.
simulated 100x	duplicate	UGT1A9	CDC42EP1	+/+	+/+	2:234675811	22:37960413	splice-site	5'UTR	translocation	downstream	upstream	28	12	16	50	47	high	.	.	duplicates(1)	.	.	.	.
simulated 100x	duplicate	UGT1A8	CDC42EP1	+/+	+/+	2:234675811	22:37960413	splice-site	5'UTR	translocation	downstream	upstream	28	12	16	50	47	high	.	.	duplicates(1)	.	.	.	.
simulated 100x	duplicate	UGT1A3	CDC42EP1	+/+	+/+	2:234675811	22:37960413	splice-site	5'UTR	translocation	downstream	upstream	28	12	16	50	47	high	.	.	duplicates(1)	.	.	.	.
simulated 100x	duplicate	UGT1A5	CDC42EP1	+/+	+/+	2:234675811	22:37960413	splice-site	5'UTR	translocation	downstream	upstream	28	12	16	50	47	high	.	.	duplicates(1)	.	.	.	.
simulated 100x	validated	CHAD	CACNG5	-/-	+/+	17:48542655	17:64876672	splice-site	splice-site	inversion	upstream	upstream	20	23	13	53	53	high	.	.	mismatches(2)	.	.	.	.
simulated 100x	validated	GDPD2	MTMR8	+/+	-/-	X:69652468	X:63579408	CDS	splice-site	inversion	downstream	downstream	27	14	15	133	45	high	.	.	.	.	.	.	.
simulated 100x	validated	RAPGEF5	OGDH	-/-	+/+	7:22306583	7:44646194	splice-site	5'UTR	inversion	upstream	upstream	17	16	23	75	100	high	.	.	.	.	.	.	.
simulated 100x	validated	TMED8	FLYWCH1	-/-	+/+	14:77818016	16:3000226	splice-site	3'UTR	translocation	upstream	upstream	20	21	14	66	68	high	.	.	duplicates(1),low_entropy(1),mismappers(2),mismatches(1)	.	.	.	.
simulated 100x	validated	CLCA1	MARK3	+/+	+/+	1:86947915	14:103946724	CDS	splice-site	translocation	downstream	upstream	16	20	19	49	164	high	.	.	.	.	.	.	.
simulated 100x	validated	AKT2	PIK3R2	-/-	+/+	19:40741797	19:18272776	splice-site	splice-site	inversion	upstream	upstream	15	22	18	161	86	high	.	.	duplicates(1)	.	.	.	.
simulated 100x	duplicate	AKT2	PIK3R2	-/-	+/+	19:40741797	19:18272776	splice-site	splice-site	inversion	upstream	upstream	15	22	18	161	86	high	.	.	duplicates(1)	.	.	.	.
simulated 100x	validated	TXNDC5	GUCA1A	-/-	+/+	6:7888938	6:42146981	splice-site	splice-site	inversion	upstream	upstream	16	21	18	216	89	high	.	.	.	.	.	.	.
simulated 100x	validated	PHKB	SPNS3	+/+	+/+	16:47533705	17:4381867	CDS	splice-site	translocation	downstream	upstream	22	18	14	79	53	high	.	.	.	.	.	.	.
simulated 100x	validated	DGKD	PTPRN	+/+	-/-	2:234343545	2:220172279	splice-site	splice-site	inversion	downstream	downstream	15	22	17	70	64	high	.	.	.	.	.	.	.
simulated 100x	non-validated	ECI2	ZC3H12D	-/-	-/-	6:4115923	6:149773858	3'UTR	splice-site	duplication	upstream	downstream	13	17	24	58	59	high	.	.	mismatches(2)	.	.	.	.
simulated 100x	validated	REV1	NEK4	-/-	-/-	2:100019106	3:52786085	splice-site	splice-site	translocation	upstream	downstream	23	15	16	75	77	high	.	.	.	.	.	.	.
simulated 100x	duplicate	BLOC1S5-TXNDC5	GUCA1A	-/-	+/+	6:7888938	6:42146981	splice-site	splice-site	inversion	upstream	upstream	15	21	18	216	89	high	.	.	.	.	.	.	.
simulated 100x	validated	TMED5	ATF3	-/-	+/+	1:93617415	1:212792700	3'UTR	splice-site	inversion	upstream	upstream	16	17	20	62	83	high	.	.	.	.	.	.	.
simulated 100x	validated	ALDH1A2	MYO5A	-/-	-/-	15:58245630	15:52615642	3'UTR	splice-site	deletion	upstream	downstream	15	18	20	65	63	high	.	.	low_entropy(2),mismappers(5)	.	.	.	.
simulated 100x	validated	LARP4	HOXC6	+/+	+/+	12:50867861	12:54422360	CDS	splice-site	deletion	downstream	upstream	16	22	15	100	60	high	.	.	low_entropy(1)	.	.	.	.
simulated 100x	validated	ACVR2B	LMLN	+/+	+/+	3:38520696	3:197710814	CDS	splice-site	deletion	downstream	upstream	21	17	15	127	56	high	.	.	mismatches(1)	.	.	.	.
simulated 100x	validated	HMOX1	ARHGAP8	+/+	+/+	22:35779219	22:45204187	splice-site	splice-site	deletion	downstream	upstream	17	17	19	147	100	high	.	.	.	.	.	.	.
simulated 100x	duplicate	HMOX1	PRR5-ARHGAP8	+/+	+/+	22:35779219	22:45204187	splice-site	splice-site	deletion	downstream	upstream	17	17	19	147	100	high	.	.	.	.	.	.	.
simulated 100x	validated	FAM177B	RORC	+/+	-/-	1:222920422	1:151803448	splice-site	CDS	inversion	downstream	downstream	19	18	15	47	51	high	.	.	.	.	.	.	.
simulated 100x	validated	KCNH5	AKT1	-/-	-/-	14:63269047	14:105240304	splice-site	CDS	duplication	upstream	downstream	16	22	14	49	125	high	.	.	duplicates(1),mismatches(2)	.	.	.	.
simulated 100x	validated	SACS	SYNJ2	-/-	+/+	13:23949259	6:158480285	splice-site	intron	translocation	upstream	upstream	15	24	12	60	69	high	.	.	duplicates(1),low_entropy(3)	.	.	.	.
simulated 100x	validated	PHOSPHO2	HTR4	+/+	-/-	2:170551757	5:147902793	splice-site	CDS	translocation	downstream	downstream	22	16	13	62	56	high	.	.	mismappers(2)	.	.	.	.
simulated 100x	duplicate	KLHL23	HTR4	+/+	-/-	2:170551757	5:147902793	splice-site	CDS	translocation	downstream	downstream	22	16	13	62	56	high	.	.	mismappers(2)	.	.	.	.
simulated 100x	validated	UACA	ADPGK	-/-	-/-	15:70969447	15:73048788	splice-site	splice-site	duplication	upstream	downstream	20	11	20	74	87	high	.	.	.	.	.	.	.
simulated 100x	validated	PSMD6	RAD54L2	-/-	+/+	3:64008139	3:51664721	CDS	splice-site	inversion	upstream	upstream	20	14	16	260	87	high	.	.	.	.	.	.	.
simulated 100x	validated	CDC20B	PHACTR4	-/-	+/+	5:54439341	1:28733921	splice-site	splice-site	translocation	upstream	upstream	13	15	21	72	101	high	.	.	mismappers(3)	.	.	.	.
simulated 100x	validated	QKI	ZUFSP	+/+	-/-	6:163983101	6:116987858	splice-site	CDS	inversion	downstream	downstream	23	15	10	188	57	high	.	.	.	.	.	.	.
simulated 100x	validated	AHR	ZNF3	+/+	-/-	7:17370510	7:99672884	splice-site	splice-site	inversion	downstream	downstream	20	17	11	56	75	high	.	.	duplicates(1)	.	.	.	.
simulated 100x	validated	ZBTB9	TIMM17A	+/+	+/+	6:33422552	1:201926639	splice-site	splice-site	translocation	downstream	upstream	14	15	19	76	244	high	.	.	low_entropy(1)	.	.	.	.
simulated 100x	validated	LRRFIP1	GALNT3	+/+	-/-	2:238662122	2:166650760	splice-site	5'UTR	inversion	downstream	downstream	11	23	14	103	56	high	.	.	.	.	.	.	.
simulated 100x	validated	BRCC3	SRSF5	+/+	+/+	X:154348443	14:70234874	splice-site	CDS	translocation	downstream	upstream	15	14	19	49	617	high	.	.	mismappers(4)	.	.	.	.
simulated 100x	validated	WBP4	UNC5B	+/+	+/+	13:41646993	10:73052224	splice-site	splice-site	translocation	downstream	upstream	16	15	17	63	92	high	.	.	mismatches(1)	.	.	.	.
simulated 100x	validated	LIN9	SV2A	-/-	-/-	1:226420797	1:149881125	splice-site	splice-site	deletion	upstream	downstream	16	21	11	61	108	high	.	.	mismatches(3)	.	.	.	.
simulated 100x	validated	ENPP5	SLC17A1	-/-	-/-	6:46138545	6:25832287	splice-site	5'UTR	deletion	upstream	downstream	17	17	13	65	45	high	.	.	.	.	.	.	.
simulated 100x	validated	SELENBP1	IARS2	-/-	+/+	1:151338878	1:220316286	CDS	splice-site	inversion	upstream	upstream	15	17	15	85	116	high	.	.	mismatches(1)	.	.	.	.
simulated 100x	validated	RYR1	GRIN3B	+/+	+/+	19:39057627	19:1007627	splice-site	splice-site	duplication	downstream	upstream	18	18	11	54	65	high	.	.	.	.	.	.	.
simulated 100x	validated	SLC45A3	KCND3	-/-	-/-	1:205626979	1:112323413	3'UTR	splice-site	deletion	upstream	downstream	15	22	10	57	52	high	.	.	duplicates(1),inconsistently_clipped(1)	.	.	.	.
simulated 100x	validated	MDS2	HP1BP3	+/+	-/-	1:23954488	1:21076375	splice-site	splice-site	inversion	downstream	downstream	12	16	19	41	122	high	.	.	mismatches(1)	.	.	.	.
simulated 100x	validated	AMOT	CLCN5	-/-	+/+	X:112025768	X:49845251	splice-site	splice-site	inversion	upstream	upstream	17	14	15	69	54	high	.	.	.	.	.	.	.
simulated 100x	validated	VRK2	ITGB1BP1	+/+	-/-	2:58366966	2:9548534	splice-site	intron	inversion	downstream	downstream	14	15	17	71	47	high	.	.	duplicates(1),low_entropy(2),mismappers(2)	.	.	.	.
simulated 100x	non-validated	ETV3	CALML6	-/-	+/+	1:157105262	1:1846849	splice-site	exon	inversion	upstream	upstream	19	20	7	25	55	high	.	.	.	.	.	.	.
simulated 100x	validated	CAPRIN2	ELOVL4	-/-	-/-	12:30876193	6:80657023	splice-site	5'UTR	translocation	upstream	downstream	21	10	15	90	40	high	.	.	low_entropy(4)	.	.	.	.
simulated 100x	validated	SEPT8	RASA1	-/-	+/+	5:132091698	5:86659164	3'UTR	splice-site	inversion	upstream	upstream	16	12	18	51	68	high	.	.	low_entropy(2),mismappers(3)	.	.	.	.
simulated 100x	validated	JMY	AP3S1	+/+	+/+	5:78596141	5:115205714	splice-site	splice-site	deletion	downstream	upstream	6	17	22	47	84	high	.	.	mismappers(1)	.	.	.	.
simulated 100x	validated	MED6	WISP2	-/-	+/+	14:71063328	20:43355728	splice-site	splice-site	translocation	upstream	upstream	14	20	11	118	77	high	.	.	.	.	.	.	.
simulated 100x	validated	ITGA3	CSHL1	+/+	-/-	17:48151367	17:61987594	splice-site	CDS	inversion	downstream	downstream	0	22	23	88	53	high	.	.	.	.	.	.	.
simulated 100x	validated	PVALB	SCARA5	-/-	-/-	22:37211147	8:27762351	splice-site	splice-site	translocation	upstream	downstream	16	17	12	57	45	high	.	.	.	.	.	.	.
simulated 100x	validated	MASP1	PPIC	-/-	-/-	3:186969422	5:122372420	splice-site	5'UTR	translocation	upstream	downstream	16	15	14	58	53	high	.	.	.	.	.	.	.
simulated 100x	validated	MAPKAPK3	TBCCD1	+/+	-/-	3:50684256	3:186272873	splice-site	splice-site	inversion	downstream	downstream	17	18	10	183	55	high	.	.	.	.	.	.	.
simulated 100x	validated	PRKRIP1	MUC3A	+/+	+/+	7:102067113	7:100552886	3'UTR	splice-site	duplication	downstream	upstream	12	20	13	57	60	high	.	.	low_entropy(3)	.	.	.	.
simulated 100x	duplicate	CTD-2540L5.5	WISP2	-/-	+/+	14:71063328	20:43355728	splice-site	splice-site	translocation	upstream	upstream	14	20	11	118	77	high	.	.	.	.	.	.	.
simulated 100x	validated	MTF2	KPNA6	+/+	+/+	1:93545088	1:32622454	splice-site	splice-site	duplication	downstream	upstream	22	8	15	159	79	high	.	.	.	.	.	.	.
simulated 100x	validated	CENPV	PTRH2	-/-	-/-	17:16252565	17:57775339	UTR	splice-site	duplication	upstream	downstream	8	17	20	51	167	high	.	.	mismatches(1)	.	.	.	.
simulated 100x	validated	SNRPG	ORC2	-/-	-/-	2:70520752	2:201790633	splice-site	CDS	duplication	upstream	downstream	26	2	16	420	71	high	.	.	.	.	.	.	.
simulated 100x	validated	UBR4	AMT	-/-	-/-	1:19421399	3:49459823	splice-site	CDS	translocation	upstream	downstream	14	21	9	232	130	high	.	.	.	.	.	.	.
simulated 100x	validated	UCHL1	CASP3	+/+	-/-	4:41266178	4:185550655	splice-site	splice-site	inversion	downstream	downstream	18	12	13	1605	138	high	.	.	.	.	.	.	.
simulated 100x	validated	THAP6	BBS7	+/+	-/-	4:76442189	4:122770028	splice-site	CDS	inversion	downstream	downstream	19	11	12	51	49	high	.	.	duplicates(1),mismappers(1)	.	.	.	.
simulated 100x	validated	FAM72A	RGS1	+/+	+/+	1:206145578	1:192547352	splice-site	splice-site	duplication	downstream	upstream	29	0	13	70	51	high	.	.	.	.	.	.	.
simulated 100x	validated	CSMD2	GBP5	-/-	-/-	1:34280897	1:89728468	splice-site	splice-site	duplication	upstream	downstream	9	17	16	46	36	high	.	.	.	.	.	.	.
simulated 100x	validated	VOPP1	ZKSCAN1	-/-	+/+	7:55565306	7:99613204	splice-site	5'UTR	inversion	upstream	upstream	18	17	7	101	51	high	.	.	.	.	.	.	.
simulated 100x	validated	SLC35E3	MLXIP	+/+	+/+	12:69153020	12:122625506	splice-site	CDS	deletion	downstream	upstream	12	16	14	60	71	high	.	.	low_entropy(3)	.	.	.	.
simulated 100x	validated	WIPF2	TAOK1	+/+	+/+	17:38418894	17:27825383	splice-site	CDS	duplication	downstream	upstream	17	13	12	58	96	high	.	.	.	.	.	.	.
simulated 100x	validated	CYTIP	OTUD3	-/-	+/+	2:158300359	1:20209006	splice-site	5'UTR	translocation	upstream	upstream	12	16	14	51	64	high	.	.	low_entropy(2)	.	.	.	.
simulated 100x	validated	CTSS	ACTN2	-/-	+/+	1:150730334	1:236924315	splice-site	splice-site	inversion	upstream	upstream	11	13	17	83	73	high	.	.	mismatches(1)	.	.	.	.
simulated 100x	validated	TREM2	HBS1L	-/-	-/-	6:41127530	6:135371785	splice-site	splice-site	duplication	upstream	downstream	12	10	19	64	114	high	.	.	low_entropy(5)	.	.	.	.
simulated 100x	validated	PIK3AP1	UPF2	-/-	-/-	10:98363736	10:12043824	splice-site	splice-site	deletion	upstream	downstream	15	17	9	56	47	high	.	.	duplicates(1)	.	.	.	.
simulated 100x	validated	NSUN3	FAM160A1	+/+	+/+	3:93803294	4:152487290	splice-site	splice-site	translocation	downstream	upstream	21	6	12	75	66	high	.	.	mismappers(2)	.	.	.	.
simulated 100x	validated	LHPP	PAOX	+/+	+/+	10:126186697	10:135193503	splice-site	splice-site	deletion	downstream	upstream	22	10	7	110	58	high	.	.	duplicates(2),low_entropy(2),mismappers(2)	.	.	.	.
simulated 100x	validated	WWC1	ETF1	+/+	-/-	5:167868826	5:137878626	CDS	splice-site	inversion	downstream	downstream	10	15	14	67	165	high	.	.	low_entropy(2)	.	.	.	.
simulated 100x	validated	RREB1	CYHR1	+/+	-/-	6:7240775	8:145689995	CDS	splice-site	translocation	downstream	downstream	6	18	14	63	79	high	.	.	.	.	.	.	.
simulated 100x	validated	BTF3	RELL2	+/+	+/+	5:72795027	5:141020238	splice-site	splice-site	deletion	downstream	upstream	18	3	17	1513	135	high	.	.	low_entropy(1)	.	.	.	.
simulated 100x	non-validated	NEU1	SUPT3H	-/-	-/-	6:31825435	6:45333037	3'UTR	splice-site	duplication	upstream	downstream	18	3	16	60	55	high	.	.	duplicates(1),low_entropy(1)	.	.	.	.
simulated 100x	validated	PICK1	CBX6	+/+	-/-	22:38453539	22:39263207	5'UTR	splice-site	inversion	downstream	downstream	12	12	13	30	54	high	.	.	low_entropy(3)	.	.	.	.
simulated 100x	validated	GSPT1	GAN	-/-	+/+	16:11976872	16:81385188	splice-site	splice-site	inversion	upstream	upstream	11	15	11	225	57	high	.	.	mismatches(1)	.	.	.	.
simulated 100x	validated	SIGLEC1	TBC1D2B	-/-	-/-	20:3667617	15:78290697	3'UTR	splice-site	translocation	upstream	downstream	7	16	13	43	73	high	.	.	low_entropy(3)	.	.	.	.
simulated 100x	validated	LAP3	ING4	+/+	-/-	4:17608493	12:6765964	CDS	splice-site	translocation	downstream	downstream	20	4	11	117	67	high	.	.	.	.	.	.	.
simulated 100x	validated	TP53I3	ACVR1	-/-	-/-	2:24303689	2:158634854	splice-site	splice-site	duplication	upstream	downstream	10	11	14	125	91	high	.	.	duplicates(1),mismatches(1)	.	.	.	.
simulated 100x	validated	UGT3A2	RBM4	-/-	+/+	5:36051972	11:66406214	splice-site	5'UTR	translocation	upstream	upstream	8	5	21	63	27	high	.	.	.	.	.	.	.
simulated 100x	validated	NBL1	NECAP2	+/+	+/+	1:19983403	1:16775635	splice-site	CDS	duplication	downstream	upstream	20	3	10	66	56	high	.	.	.	.	.	.	.
simulated 100x	validated	TLE1	RALGDS	-/-	-/-	9:84226684	9:136037919	splice-site	splice-site	duplication	upstream	downstream	16	9	8	116	55	high	.	.	.	.	.	.	.
simulated 100x	duplicate	TLE1	GBGT1	-/-	-/-	9:84226684	9:136037919	splice-site	splice-site	duplication	upstream	downstream	16	9	8	116	55	high	.	.	.	.	.	.	.
simulated 100x	validated	TYRP1	CLCN6	+/+	+/+	9:12704705	1:11879545	splice-site	splice-site	translocation	downstream	upstream	13	8	11	44	83	high	.	.	.	.	.	.	.
simulated 100x	validated	KHDRBS2	SYTL1	-/-	+/+	6:62407100	1:27676238	splice-site	CDS	translocation	upstream	upstream	6	12	14	62	50	high	.	.	mismatches(11)	.	.	.	.
simulated 100x	validated	IRAK1	XAGE2B	-/-	+/+	X:153284050	X:52115723	splice-site	CDS	inversion	upstream	upstream	1	13	18	197	32	high	.	.	low_entropy(2)	.	.	.	.
simulated 100x	validated	REG3G	KCTD1	+/+	-/-	2:79254376	18:24035865	exon	splice-site	translocation	downstream	downstream	2	10	19	64	64	high	.	.	duplicates(1)	.	.	.	.
simulated 100x	validated	MYO3B	COX5B	+/+	+/+	2:171070993	2:98262980	splice-site	splice-site	duplication	downstream	upstream	24	0	7	66	67	high	.	.	mismappers(37),mismatches(1)	.	.	.	.
simulated 100x	validated	PAPD5	MT1A	+/+	+/+	16:50258905	16:56673229	splice-site	CDS	deletion	downstream	upstream	3	9	18	59	0	high	.	.	.	.	.	.	.
simulated 100x	duplicate	UGT3A2	RBM14-RBM4	-/-	+/+	5:36051972	11:66406214	splice-site	intron	translocation	upstream	upstream	8	1	21	63	27	high	.	.	.	.	.	.	.
simulated 100x	validated	DLD	NPTX2	+/+	+/+	7:107545503	7:98256477	splice-site	splice-site	duplication	downstream	upstream	8	8	13	106	82	high	.	.	duplicates(1)	.	.	.	.
simulated 100x	validated	MAPK1	RGL4	-/-	+/+	22:22127162	22:24040483	splice-site	CDS	inversion	upstream	upstream	22	0	6	148	57	high	.	.	duplicates(1),low_entropy(1),mismappers(32),mismatches(3)	.	.	.	.
simulated 100x	validated	SYT9	CEACAM4	+/+	-/-	11:7335172	19:42126615	splice-site	splice-site	translocation	downstream	downstream	7	12	7	34	49	high	.	.	.	.	.	.	.
simulated 100x	validated	AFM	ANXA3	+/+	+/+	4:74353454	4:79507414	CDS	splice-site	deletion	downstream	upstream	11	1	14	8	71	high	.	.	mismatches(5)	.	.	.	.
simulated 100x	validated	ATAD3C	GBP7	+/+	-/-	1:1389880	1:89641723	splice-site	5'UTR	inversion	downstream	downstream	18	0	8	52	41	high	.	.	low_entropy(2)	.	.	.	.
simulated 100x	validated	RPGRIP1L	NOB1	-/-	-/-	16:53692365	16:69786274	CDS	splice-site	duplication	upstream	downstream	0	6	19	0	189	high	.	.	mismatches(4)	.	.	.	.
simulated 100x	validated	TNPO1	FAM173B	+/+	-/-	5:72179058	5:10249981	splice-site	CDS	inversion	downstream	downstream	4	0	20	178	38	high	.	.	low_entropy(3)	.	.	.	.
simulated 100x	validated	SSX2B	BIVM	+/+	+/+	X:52781826	13:103473387	splice-site	splice-site	translocation	downstream	upstream	17	0	6	21	59	high	.	.	.	.	.	.	.
simulated 100x	duplicate	SSX2B	BIVM-ERCC5	+/+	+/+	X:52781826	13:103473387	splice-site	splice-site	translocation	downstream	upstream	17	0	6	21	59	high	.	.	.	.	.	.	.
simulated 100x	validated	TSC2	ACSM2A	+/+	+/+	16:2112984	16:20471429	CDS	splice-site	deletion	downstream	upstream	8	2	12	48	39	high	.	.	mismatches(2)	.	.	.	.
simulated 100x	non-validated	STAMBP	RGPD2	+/+	-/-	2:74071986	2:88115940	CDS	splice-site	inversion	downstream	downstream	1	14	6	40	20	high	.	.	mismappers(1)	.	.	.	.
simulated 100x	validated	CPVL	ANAPC5	-/-	-/-	7:29160673	12:121756226	CDS	splice-site	translocation	upstream	downstream	8	2	11	0	233	high	.	.	mismatches(4)	.	.	.	.
simulated 100x	non-validated	RGPD3	ROCK2	-/-	-/-	2:107051093	2:11335242	splice-site	exon	deletion	upstream	downstream	16	0	4	19	22	high	.	.	.	.	.	.	.
simulated 100x	validated	TGIF2LX	TREX2	+/+	-/-	X:89177882	X:152730456	splice-site	5'UTR	inversion	downstream	downstream	4	0	16	41	1	high	.	.	low_entropy(4)	.	.	.	.
simulated 100x	duplicate	TGIF2LX	HAUS7	+/+	-/-	X:89177882	X:152730456	splice-site	CDS	inversion	downstream	downstream	4	0	16	41	1	high	.	.	low_entropy(4)	.	.	.	.
simulated 100x	validated	RPS6KB1	SLC25A51	+/+	-/-	17:58022879	9:37888589	splice-site	splice-site	translocation	downstream	downstream	11	0	6	52	48	high	.	.	.	.	.	.	.
simulated 100x	non-validated	CD1D	UBQLN4P1	+/+	-/-	1:158149952	3:148704103	splice-site	exon	translocation	downstream	downstream	16	1	0	41	5	high	.	.	.	.	.	.	.
simulated 100x	non-validated	SPATA31A4	CYLC2	-/-	+/+	9:41327145	9:105767248	splice-site	intron	inversion	upstream	upstream	9	0	8	52	55	high	.	.	.	.	.	.	.
simulated 100x	duplicate	RP11-178C3.1	SLC25A51	+/+	-/-	17:58022879	9:37888589	splice-site	splice-site	translocation	downstream	downstream	11	0	6	52	48	high	.	.	.	.	.	.	.
simulated 100x	validated	ETV3L	CALML6	-/-	+/+	1:157068932	1:1846849	splice-site	exon	inversion	upstream	upstream	5	2	4	13	55	high	.	.	.	.	.	.	.
simulated 100x	non-validated	CBWD2	PDLIM5	+/+	+/+	2:114251571	4:95373037	splice-site	5'UTR	translocation	downstream	upstream	8	0	3	11	41	high	.	.	.	.	.	.	.
simulated 100x	non-validated	AGAP4	SLC16A9	-/-	-/-	10:46339774	10:61444085	splice-site	splice-site	duplication	upstream	downstream	6	0	1	5	41	high	.	.	.	.	.	.	.
simulated 100x	duplicate	AGAP4	SLC16A9	-/-	-/-	10:46342135	10:61444085	splice-site	splice-site	duplication	upstream	downstream	1	0	0	2	41	medium	.	.	.	.	.	.	.
simulated 100x	validated	CA6	MAGOH	+/+	-/-	1:9017304	1:53704171	CDS	5'UTR	inversion	downstream	downstream	20	27	20	51	170	medium	.	.	.	.	.	.	.
simulated 100x	validated	VWA5A	SAC3D1	+/+	+/+	11:123988406	11:64809086	CDS	CDS	duplication	downstream	upstream	18	18	17	67	78	medium	.	.	duplicates(1)	.	.	.	.
simulated 100x	validated	TEX13A	FHL1	-/-	+/+	X:104463646	X:135229624	3'UTR	5'UTR	inversion	upstream	upstream	19	14	20	61	69	medium	.	.	.	.	.	.	.
simulated 100x	validated	SNHG3	NFASC	+/+	+/+	1:28836145	1:204951012	exon	CDS	deletion	downstream	upstream	12	23	17	98	63	medium	.	.	mismappers(2),mismatches(1)	.	.	.	.
simulated 100x	validated	SPON1	CNGA4	+/+	+/+	11:14279316	11:6261838	exon	CDS	duplication	downstream	upstream	23	15	12	71	47	medium	.	.	duplicates(1),mismatches(1)	.	.	.	.
simulated 100x	validated	FRG2C	WNT7A	+/+	-/-	3:75714303	3:13917429	CDS	exon	inversion	downstream	downstream	17	12	21	47	67	medium	.	.	mismatches(1)	.	.	.	.
simulated 100x	validated	ABHD14B	MCF2L2	-/-	-/-	3:52002569	3:182897969	3'UTR	exon	duplication	upstream	downstream	20	18	12	71	47	medium	.	.	low_entropy(1)	.	.	.	.
simulated 100x	validated	UQCRC2	POLR2C	+/+	+/+	16:21991941	16:57496299	CDS	5'UTR	deletion	downstream	upstream	14	19	16	315	55	medium	.	.	low_entropy(1)	.	.	.	.
simulated 100x	validated	TJAP1	NEDD9	+/+	-/-	6:43471405	6:11382571	CDS	5'UTR	inversion	downstream	downstream	17	20	11	121	44	medium	.	.	low_entropy(1)	.	.	.	.
simulated 100x	validated	THRAP3	FAM78B	+/+	-/-	1:36762383	1:166039579	intron	CDS	inversion	downstream	downstream	14	15	16	173	75	medium	.	.	.	.	.	.	.
simulated 100x	validated	PRPH	MVK	+/+	+/+	12:49690738	12:110012611	CDS	intron	deletion	downstream	upstream	13	16	15	52	65	medium	.	.	.	.	.	.	.
simulated 100x	validated	KIFC1	MTFR2	+/+	-/-	6:33374390	6:136562818	CDS	intron	inversion	downstream	downstream	11	15	16	215	78	medium	.	.	inconsistently_clipped(1),mismatches(5)	.	.	.	.
simulated 100x	validated	C1QTNF1	SHISA6	+/+	+/+	17:77045485	17:11461171	3'UTR	CDS	duplication	downstream	upstream	17	12	11	50	63	medium	.	.	duplicates(1)	.	.	.	.
simulated 100x	validated	STX6	LNX2	-/-	-/-	1:180953888	13:28127470	CDS	CDS	translocation	upstream	downstream	13	8	14	0	61	medium	.	.	mismatches(1)	.	.	.	.
simulated 100x	validated	TMEM132E	EPN2	+/+	+/+	17:32955685	17:19185375	CDS	5'UTR	duplication	downstream	upstream	5	7	17	47	68	medium	.	.	mismatches(2)	.	.	.	.
simulated 100x	validated	NES	DISP1	-/-	+/+	1:156639402	1:223101782	CDS	5'UTR	inversion	upstream	upstream	0	0	28	327	74	medium	.	.	.	.	.	.	.
simulated 100x	duplicate	RP11-161H23.9	MVK	-/+	+/+	12:49690738	12:110012611	exon	intron	deletion/3'-3'	downstream	upstream	4	16	3	52	65	medium	.	.	.	.	.	.	.
simulated 100x	validated	BTF3	FCHSD1	+/+	-/+	5:72795027	5:141020251	CDS	3'UTR	deletion/5'-5'	downstream	upstream	0	0	21	1513	141	medium	.	.	.	.	.	.	.
simulated 100x	duplicate	MINOS1-NBL1	NECAP2	+/+	+/+	1:19983404	1:16775636	CDS	CDS	duplication	downstream	upstream	5	0	10	66	56	medium	.	.	.	.	.	.	.
simulated 100x	validated	GRIN1	CARD9	+/+	-/-	9:140053151	9:139257584	CDS	exon	inversion	downstream	downstream	0	0	14	82	57	medium	.	.	duplicates(1)	.	.	.	.
simulated 100x	non-validated	TBC1D3H	TMC6	-/-	-/-	17:34748575	17:76122640	CDS	CDS	duplication	upstream	downstream	5	0	8	3	87	medium	.	.	.	.	.	.	.
simulated 100x	validated	GAGE2C	MAGEB1	+/+	+/+	X:49230859	X:30268549	CDS	splice-site	duplication	downstream	upstream	0	12	0	5	37	medium	.	.	.	.	.	.	.
simulated 100x	non-validated	IGF2BP1	LRRC37A	+/+	+/+	17:47114022	17:44372497	exon	5'UTR	duplication	downstream	upstream	0	5	3	42	6	medium	.	.	.	.	.	.	.
simulated 100x	non-validated	PAPD5	MT1P3	+/+	+/+	16:50258905	20:33805893	splice-site	exon	translocation	downstream	upstream	3	0	0	59	0	medium	.	.	.	.	.	.	.
simulated 100x	non-validated	MCM7	MIR302B	-/-	-/-	7:99691796	4:113568623	splice-site	splice-site	translocation	upstream	downstream	0	1	0	591	2355	medium	.	.	.	.	.	.	.
simulated 100x	duplicate	MIR302B	MCM7	-/-	-/-	4:113569810	7:99691024	splice-site	splice-site	translocation	upstream	downstream	0	1	0	648	523	medium	.	.	.	.	.	.	.
simulated 100x	non-validated	ZMYND8(12219),RP1-148H17.1(22887)	ZMYND8	./-	-/-	20:45997786	20:45938948	intergenic	splice-site	deletion/read-through	upstream	downstream	0	4	3	86	113	low	.	.	.	.	.	.	.
simulated 100x	non-validated	SLC13A5	MIR4520A(2470),SLC13A5(26734)	-/-	./-	17:6593240	17:6561298	exon	intergenic	deletion/read-through	upstream	downstream	0	0	3	3	5	low	.	.	.	.	.	.	.
simulated 100x	non-validated	ELMO1(43792),NECAP1P1(92459)	GPR141	./+	+/+	7:37532644	7:37779982	intergenic	splice-site	deletion/read-through	downstream	upstream	1	1	0	4	5	low	.	.	.	.	.	.	.
simulated 100x	non-validated	RMST	MIR302B	+/+	-/-	12:97954825	4:113568623	splice-site	splice-site	translocation	downstream	downstream	1	1	0	14	2355	low	.	.	.	.	.	.	.
simulated 10x	validated	ZBTB9	TIMM17A	+/+	+/+	6:33422552	1:201926639	splice-site	splice-site	translocation	downstream	upstream	6	4	1	29	197	high	.	.	.	.	.	.	.
simulated 10x	validated	RREB1	CYHR1	+/+	-/-	6:7240775	8:145689995	CDS	splice-site	translocation	downstream	downstream	1	4	5	10	39	high	.	.	low_entropy(1)	.	.	.	.
simulated 10x	validated	ACVR2B	LMLN	+/+	+/+	3:38520696	3:197710814	CDS	splice-site	deletion	downstream	upstream	6	1	3	80	14	high	.	.	.	.	.	.	.
simulated 10x	validated	MBNL3	G6PD	-/-	-/-	X:131524957	X:153762375	CDS	splice-site	duplication	upstream	downstream	2	6	2	11	124	high	.	.	.	.	.	.	.
simulated 10x	validated	SS18L1	HAPLN4	+/+	-/-	20:60749700	19:19373605	splice-site	5'UTR	translocation	downstream	downstream	4	1	5	41	5	high	.	.	.	.	.	.	.
simulated 10x	duplicate	SS18L1	AC138430.4	+/+	-/-	20:60749700	19:19373605	splice-site	exon	translocation	downstream	downstream	4	1	5	41	5	high	.	.	.	.	.	.	.
simulated 10x	validated	MDS2	HP1BP3	+/+	-/-	1:23954488	1:21076375	splice-site	splice-site	inversion	downstream	downstream	4	2	4	9	82	high	.	.	.	.	.	.	.
simulated 10x	validated	GIMAP6	EPHA1	-/-	-/-	7:150324806	7:143092274	3'UTR	splice-site	deletion	upstream	downstream	4	2	4	8	193	high	.	.	.	.	.	.	.
simulated 10x	validated	FAM177B	RORC	+/+	-/-	1:222920423	1:151803447	splice-site	CDS	inversion	downstream	downstream	3	4	2	8	13	high	.	.	.	.	.	.	.
simulated 10x	validated	TXNDC5	GUCA1A	-/-	+/+	6:7888938	6:42146981	splice-site	splice-site	inversion	upstream	upstream	3	2	4	163	26	high	.	.	.	.	.	.	.
simulated 10x	duplicate	BLOC1S5-TXNDC5	GUCA1A	-/-	+/+	6:7888938	6:42146981	splice-site	splice-site	inversion	upstream	upstream	3	2	4	163	26	high	.	.	.	.	.	.	.
simulated 10x	validated	PHKB	SPNS3	+/+	+/+	16:47533705	17:4381867	CDS	splice-site	translocation	downstream	upstream	3	0	5	27	7	high	.	.	.	.	.	.	.
simulated 10x	validated	CTDSPL2	ADAL	+/+	+/+	15:44788656	15:43639214	splice-site	splice-site	duplication	downstream	upstream	2	1	5	41	18	high	.	.	.	.	.	.	.
simulated 10x	validated	LARP4	HOXC6	+/+	+/+	12:50867861	12:54422360	CDS	splice-site	deletion	downstream	upstream	5	1	2	59	5	high	.	.	low_entropy(1)	.	.	.	.
simulated 10x	validated	HOXD3	MSH6	+/+	+/+	2:177034326	2:48023033	CDS	splice-site	duplication	downstream	upstream	3	1	4	6	119	high	.	.	.	.	.	.	.
simulated 10x	validated	YTHDF2	CHIA	+/+	+/+	1:29063659	1:111860608	splice-site	splice-site	deletion	downstream	upstream	4	3	1	137	5	high	.	.	.	.	.	.	.
simulated 10x	validated	CYB561D1	PIGT	+/+	+/+	1:110036909	20:44048776	splice-site	splice-site	translocation	downstream	upstream	3	3	2	8	148	high	.	.	.	.	.	.	.
simulated 10x	validated	VRK2	ITGB1BP1	+/+	-/-	2:58366966	2:9548534	splice-site	intron	inversion	downstream	downstream	2	4	1	27	6	high	.	.	.	.	.	.	.
simulated 10x	validated	GRIN1	DNLZ	+/+	-/-	9:140053169	9:139257580	exon	splice-site	inversion	downstream	downstream	3	3	1	8	29	high	.	.	.	.	.	.	.
simulated 10x	validated	PICK1	CBX6	+/+	-/-	22:38453539	22:39263207	5'UTR	splice-site	inversion	downstream	downstream	1	4	2	13	32	high	.	.	low_entropy(1)	.	.	.	.
simulated 10x	validated	IL37	TACR1	+/+	-/-	2:113674825	2:75278442	splice-site	CDS	inversion	downstream	downstream	4	2	1	7	6	high	.	.	mismatches(1)	.	.	.	.
simulated 10x	validated	TYRP1	CLCN6	+/+	+/+	9:12704705	1:11879545	splice-site	splice-site	translocation	downstream	upstream	1	3	3	5	31	high	.	.	.	.	.	.	.
simulated 10x	validated	CAPRIN2	ELOVL4	-/-	-/-	12:30876193	6:80657023	splice-site	5'UTR	translocation	upstream	downstream	2	1	4	46	11	high	.	.	low_entropy(1)	.	.	.	.
simulated 10x	validated	AHR	ZNF3	+/+	-/-	7:17370510	7:99672884	splice-site	splice-site	inversion	downstream	downstream	3	4	0	6	29	high	.	.	.	.	.	.	.
simulated 10x	validated	TSN	PDE9A	+/+	+/+	2:122513529	21:44188298	splice-site	splice-site	translocation	downstream	upstream	4	2	1	10	36	high	.	.	mismatches(1)	.	.	.	.
simulated 10x	validated	SELENBP1	IARS2	-/-	+/+	1:151338878	1:220316286	CDS	splice-site	inversion	upstream	upstream	5	1	1	48	67	high	.	.	.	.	.	.	.
simulated 10x	validated	REV1	NEK4	-/-	-/-	2:100019106	3:52786085	splice-site	splice-site	translocation	upstream	downstream	3	1	3	21	38	high	.	.	.	.	.	.	.
simulated 10x	validated	PPP5C	ARMC6	+/+	+/+	19:46888166	19:19165086	splice-site	CDS	duplication	downstream	upstream	3	4	0	188	120	high	.	.	.	.	.	.	.
simulated 10x	validated	GPBP1	PPARGC1B	+/+	+/+	5:56531838	5:149227021	CDS	splice-site	deletion	downstream	upstream	2	2	3	98	25	high	.	.	.	.	.	.	.
simulated 10x	validated	RRAGB	UBA1	+/+	+/+	X:55777798	X:47070435	exon	splice-site	duplication	downstream	upstream	1	2	4	6	510	high	.	.	duplicates(1)	.	.	.	.
simulated 10x	validated	BTF3	RELL2	+/+	+/+	5:72795027	5:141020238	splice-site	splice-site	deletion	downstream	upstream	4	2	1	1473	73	high	.	.	mismatches(2)	.	.	.	.
simulated 10x	validated	MED6	WISP2	-/-	+/+	14:71063328	20:43355728	splice-site	splice-site	translocation	upstream	upstream	0	3	3	61	5	high	.	.	.	.	.	.	.
simulated 10x	validated	SIGLEC1	TBC1D2B	-/-	-/-	20:3667617	15:78290697	3'UTR	splice-site	translocation	upstream	downstream	1	1	4	8	23	high	.	.	low_entropy(1)	.	.	.	.
simulated 10x	validated	SACS	SYNJ2	-/-	+/+	13:23949259	6:158480285	splice-site	intron	translocation	upstream	upstream	5	0	1	17	13	high	.	.	.	.	.	.	.
simulated 10x	validated	ITGA3	CSHL1	+/+	-/-	17:48151367	17:61987594	splice-site	CDS	inversion	downstream	downstream	0	4	2	26	7	high	.	.	.	.	.	.	.
simulated 10x	validated	CHAD	CACNG5	-/-	+/+	17:48542655	17:64876672	splice-site	splice-site	inversion	upstream	upstream	1	4	1	5	10	high	.	.	.	.	.	.	.
simulated 10x	validated	TMED8	FLYWCH1	-/-	+/+	14:77818016	16:3000226	splice-site	3'UTR	translocation	upstream	upstream	1	2	3	14	13	high	.	.	.	.	.	.	.
simulated 10x	validated	GIGYF2	PCGF1	+/+	-/-	2:233625269	2:74732737	splice-site	splice-site	inversion	downstream	downstream	4	1	1	55	24	high	.	.	.	.	.	.	.
simulated 10x	validated	SEPT8	RASA1	-/-	+/+	5:132091697	5:86659165	3'UTR	splice-site	inversion	upstream	upstream	1	5	0	3	12	high	.	.	low_entropy(1)	.	.	.	.
simulated 10x	duplicate	CTD-2540L5.5	WISP2	-/-	+/+	14:71063328	20:43355728	splice-site	splice-site	translocation	upstream	upstream	0	3	3	61	5	high	.	.	.	.	.	.	.
simulated 10x	validated	LHPP	PAOX	+/+	+/+	10:126186697	10:135193503	splice-site	splice-site	deletion	downstream	upstream	2	3	1	54	5	high	.	.	.	.	.	.	.
simulated 10x	validated	SLC35E3	MLXIP	+/+	+/+	12:69153019	12:122625505	splice-site	CDS	deletion	downstream	upstream	3	2	1	23	18	high	.	.	.	.	.	.	.
simulated 10x	validated	SLC45A3	KCND3	-/-	-/-	1:205626979	1:112323413	3'UTR	splice-site	deletion	upstream	downstream	4	0	2	9	3	high	.	.	.	.	.	.	.
simulated 10x	validated	PRKRIP1	MUC3A	+/+	+/+	7:102067113	7:100552886	3'UTR	splice-site	duplication	downstream	upstream	0	2	4	17	11	high	.	.	low_entropy(1)	.	.	.	.
simulated 10x	validated	RPGRIP1L	NOB1	-/-	-/-	16:53692365	16:69786274	CDS	splice-site	duplication	upstream	downstream	0	3	3	0	141	high	.	.	.	.	.	.	.
simulated 10x	validated	PSMD8	ICAM1	+/+	+/+	19:38866872	19:10394866	splice-site	CDS	duplication	downstream	upstream	2	1	3	365	15	high	.	.	.	.	.	.	.
simulated 10x	validated	BRCC3	SRSF5	+/+	+/+	X:154348443	14:70234874	splice-site	CDS	translocation	downstream	upstream	2	3	1	14	572	high	.	.	.	.	.	.	.
simulated 10x	validated	MTF2	KPNA6	+/+	+/+	1:93545088	1:32622454	splice-site	splice-site	duplication	downstream	upstream	2	2	2	117	45	high	.	.	.	.	.	.	.
simulated 10x	validated	UCHL1	CASP3	+/+	-/-	4:41266178	4:185550655	splice-site	splice-site	inversion	downstream	downstream	2	1	3	1559	98	high	.	.	.	.	.	.	.
simulated 10x	validated	TMED5	ATF3	-/-	+/+	1:93617415	1:212792700	3'UTR	splice-site	inversion	upstream	upstream	0	3	2	1	37	high	.	.	.	.	.	.	.
simulated 10x	validated	FAM72A	RGS1	+/+	+/+	1:206145578	1:192547352	splice-site	splice-site	duplication	downstream	upstream	4	0	1	22	2	high	.	.	.	.	.	.	.
simulated 10x	validated	NBL1	NECAP2	+/+	+/+	1:19983403	1:16775635	splice-site	CDS	duplication	downstream	upstream	4	1	0	23	44	high	.	.	.	.	.	.	.
simulated 10x	validated	CYTIP	OTUD3	-/-	+/+	2:158300359	1:20209006	splice-site	5'UTR	translocation	upstream	upstream	2	2	1	5	13	high	.	.	.	.	.	.	.
simulated 10x	validated	MASP1	PPIC	-/-	-/-	3:186969422	5:122372420	splice-site	5'UTR	translocation	upstream	downstream	1	3	1	5	7	high	.	.	.	.	.	.	.
simulated 10x	validated	AMOT	CLCN5	-/-	+/+	X:112025768	X:49845251	splice-site	splice-site	inversion	upstream	upstream	1	2	2	12	17	high	.	.	.	.	.	.	.
simulated 10x	validated	PRPH	MVK	+/+	+/+	12:49690739	12:110012612	CDS	splice-site	deletion	downstream	upstream	2	1	2	7	23	high	.	.	.	.	.	.	.
simulated 10x	validated	CSMD2	GBP5	-/-	-/-	1:34280897	1:89728468	splice-site	splice-site	duplication	upstream	downstream	2	1	2	5	1	high	.	.	.	.	.	.	.
simulated 10x	validated	SYT9	CEACAM4	+/+	-/-	11:7335172	19:42126615	splice-site	splice-site	translocation	downstream	downstream	1	1	3	11	7	high	.	.	.	.	.	.	.
simulated 10x	validated	LRRFIP1	GALNT3	+/+	-/-	2:238662122	2:166650760	splice-site	5'UTR	inversion	downstream	downstream	4	1	0	68	7	high	.	.	low_entropy(1)	.	.	.	.
simulated 10x	validated	PSMD6	RAD54L2	-/-	+/+	3:64008139	3:51664721	CDS	splice-site	inversion	upstream	upstream	1	1	3	225	35	high	.	.	.	.	.	.	.
simulated 10x	validated	TCTEX1D1	RFC5	+/+	+/+	1:67241987	12:118455800	CDS	splice-site	translocation	downstream	upstream	4	1	0	7	9	high	.	.	.	.	.	.	.
simulated 10x	validated	GALP	BRINP3	+/+	-/-	19:56697144	1:190250880	3'UTR	splice-site	translocation	downstream	downstream	0	4	1	1	5	high	.	.	.	.	.	.	.
simulated 10x	validated	RASSF4	THAP8	+/+	-/-	10:45486524	19:36526495	CDS	splice-site	translocation	downstream	downstream	4	0	1	17	23	high	.	.	.	.	.	.	.
simulated 10x	validated	DGKD	PTPRN	+/+	-/-	2:234343545	2:220172279	splice-site	splice-site	inversion	downstream	downstream	1	2	2	26	9	high	.	.	.	.	.	.	.
simulated 10x	validated	ACP5	FUZ	-/-	-/-	19:11688465	19:50314724	5'UTR	splice-site	duplication	upstream	downstream	1	2	2	10	67	high	.	.	.	.	.	.	.
simulated 10x	validated	UNC5CL	INO80E	-/-	+/+	6:40996291	16:30012735	CDS	splice-site	translocation	upstream	upstream	2	3	0	8	40	high	.	.	.	.	.	.	.
simulated 10x	validated	VOPP1	ZKSCAN1	-/-	+/+	7:55565306	7:99613204	splice-site	5'UTR	inversion	upstream	upstream	2	1	2	67	10	high	.	.	.	.	.	.	.
simulated 10x	validated	GDPD2	MTMR8	+/+	-/-	X:69652468	X:63579408	CDS	splice-site	inversion	downstream	downstream	2	1	2	88	12	high	.	.	.	.	.	.	.
simulated 10x	validated	INPP5E	CAMSAP1	-/-	-/-	9:139327607	9:138758382	splice-site	splice-site	deletion	upstream	downstream	2	1	2	18	29	high	.	.	.	.	.	.	.
simulated 10x	validated	UBR4	AMT	-/-	-/-	1:19421399	3:49459823	splice-site	CDS	translocation	upstream	downstream	2	1	2	194	82	high	.	.	.	.	.	.	.
simulated 10x	validated	AKT2	PIK3R2	-/-	+/+	19:40741797	19:18272776	splice-site	splice-site	inversion	upstream	upstream	2	2	1	103	26	high	.	.	.	.	.	.	.
simulated 10x	validated	KHDRBS2	SYTL1	-/-	+/+	6:62407100	1:27676238	splice-site	CDS	translocation	upstream	upstream	0	4	1	13	18	high	.	.	mismatches(2)	.	.	.	.
simulated 10x	duplicate	AKT2	PIK3R2	-/-	+/+	19:40741797	19:18272776	splice-site	splice-site	inversion	upstream	upstream	2	2	1	103	26	high	.	.	.	.	.	.	.
simulated 10x	validated	LIN9	SV2A	-/-	-/-	1:226420797	1:149881125	splice-site	splice-site	deletion	upstream	downstream	1	2	2	15	62	high	.	.	.	.	.	.	.
simulated 10x	validated	CENPV	PTRH2	-/-	-/-	17:16252565	17:57775339	UTR	splice-site	duplication	upstream	downstream	0	3	2	29	102	high	.	.	.	.	.	.	.
simulated 10x	validated	UGT3A2	RBM4	-/-	+/+	5:36051972	11:66406214	splice-site	5'UTR	translocation	upstream	upstream	2	1	2	13	27	high	.	.	.	.	.	.	.
simulated 10x	duplicate	UGT3A2	RBM14-RBM4	-/-	+/+	5:36051972	11:66406214	splice-site	intron	translocation	upstream	upstream	2	1	2	13	27	high	.	.	.	.	.	.	.
simulated 10x	validated	PPIB	TM2D3	-/-	-/-	15:64448924	15:102190362	splice-site	splice-site	duplication	upstream	downstream	2	2	1	1295	53	high	.	.	.	.	.	.	.
simulated 10x	validated	UACA	ADPGK	-/-	-/-	15:70969447	15:73048788	splice-site	splice-site	duplication	upstream	downstream	1	1	2	13	43	high	.	.	.	.	.	.	.
simulated 10x	non-validated	SPATA31A4	CYLC2	-/-	+/+	9:41327145	9:105767248	splice-site	intron	inversion	upstream	upstream	2	0	2	6	7	high	.	.	.	.	.	.	.
simulated 10x	validated	ENPP5	SLC17A1	-/-	-/-	6:46138545	6:25832287	splice-site	5'UTR	deletion	upstream	downstream	3	1	0	22	3	high	.	.	.	.	.	.	.
simulated 10x	validated	OCA2	TAC1	-/-	+/+	15:28326794	7:97364138	splice-site	splice-site	translocation	upstream	upstream	0	1	3	5	9	high	.	.	mismatches(1)	.	.	.	.
simulated 10x	validated	MYBPHL	MIER1	-/-	+/+	1:109840044	1:67424534	splice-site	splice-site	inversion	upstream	upstream	0	2	2	9	33	high	.	.	.	.	.	.	.
simulated 10x	validated	PHOSPHO2	HTR4	+/+	-/-	2:170551757	5:147902793	splice-site	CDS	translocation	downstream	downstream	1	0	3	13	4	high	.	.	duplicates(1)	.	.	.	.
simulated 10x	validated	ALDH1A2	MYO5A	-/-	-/-	15:58245629	15:52615641	3'UTR	splice-site	deletion	upstream	downstream	1	0	3	8	18	high	.	.	low_entropy(1)	.	.	.	.
simulated 10x	validated	TREM2	HBS1L	-/-	-/-	6:41127530	6:135371785	splice-site	splice-site	duplication	upstream	downstream	3	1	0	4	69	high	.	.	.	.	.	.	.
simulated 10x	validated	PVALB	SCARA5	-/-	-/-	22:37211147	8:27762351	splice-site	splice-site	translocation	upstream	downstream	2	0	2	7	4	high	.	.	.	.	.	.	.
simulated 10x	validated	NSUN3	FAM160A1	+/+	+/+	3:93803294	4:152487290	splice-site	splice-site	translocation	downstream	upstream	1	1	2	14	11	high	.	.	.	.	.	.	.
simulated 10x	validated	BOD1L1	GRPEL1	-/-	-/-	4:13610153	4:7069273	splice-site	exon	deletion	upstream	downstream	0	2	2	17	6	high	.	.	.	.	.	.	.
simulated 10x	non-validated	ECI2	ZC3H12D	-/-	-/-	6:4115922	6:149773857	3'UTR	splice-site	duplication	upstream	downstream	1	3	0	6	4	high	.	.	.	.	.	.	.
simulated 10x	duplicate	KLHL23	HTR4	+/+	-/-	2:170551757	5:147902793	splice-site	CDS	translocation	downstream	downstream	1	0	3	13	4	high	.	.	duplicates(1)	.	.	.	.
simulated 10x	validated	KCNH5	AKT1	-/-	-/-	14:63269047	14:105240304	splice-site	CDS	duplication	upstream	downstream	2	1	1	8	84	high	.	.	.	.	.	.	.
simulated 10x	validated	CPVL	ANAPC5	-/-	-/-	7:29160673	12:121756226	CDS	splice-site	translocation	upstream	downstream	0	1	3	0	178	high	.	.	.	.	.	.	.
simulated 10x	validated	WIPF2	TAOK1	+/+	+/+	17:38418892	17:27825381	splice-site	CDS	duplication	downstream	upstream	1	1	2	24	51	high	.	.	.	.	.	.	.
simulated 10x	validated	CLCA1	MARK3	+/+	+/+	1:86947915	14:103946724	CDS	splice-site	translocation	downstream	upstream	2	0	2	5	107	high	.	.	.	.	.	.	.
simulated 10x	validated	MAPKAPK3	TBCCD1	+/+	-/-	3:50684256	3:186272873	splice-site	splice-site	inversion	downstream	downstream	1	0	3	127	12	high	.	.	.	.	.	.	.
simulated 10x	validated	TSC2	ACSM2A	+/+	+/+	16:2112984	16:20471429	CDS	splice-site	deletion	downstream	upstream	1	0	3	31	7	high	.	.	.	.	.	.	.
simulated 10x	validated	WWC1	ETF1	+/+	-/-	5:167868827	5:137878625	CDS	splice-site	inversion	downstream	downstream	3	1	0	37	121	high	.	.	.	.	.	.	.
simulated 10x	validated	RAPGEF5	OGDH	-/-	+/+	7:22306583	7:44646194	splice-site	5'UTR	inversion	upstream	upstream	1	2	1	12	44	high	.	.	.	.	.	.	.
simulated 10x	validated	THAP6	BBS7	+/+	-/-	4:76442189	4:122770028	splice-site	CDS	inversion	downstream	downstream	1	1	1	8	17	high	.	.	mismappers(1)	.	.	.	.
simulated 10x	validated	JMY	AP3S1	+/+	+/+	5:78596141	5:115205714	splice-site	splice-site	deletion	downstream	upstream	0	2	1	6	35	high	.	.	.	.	.	.	.
simulated 10x	validated	MYO3B	COX5B	+/+	+/+	2:171070993	2:98262980	splice-site	splice-site	duplication	downstream	upstream	1	0	2	4	13	high	.	.	mismappers(5)	.	.	.	.
simulated 10x	non-validated	PHYHIPL	RP11-53M11.3	+/+	+/+	10:60937378	8:55471745	splice-site	exon	translocation	downstream	upstream	1	0	2	5	9	high	.	.	mismatches(1)	.	.	.	.
simulated 10x	validated	DLD	NPTX2	+/+	+/+	7:107545503	7:98256477	splice-site	splice-site	duplication	downstream	upstream	0	2	1	63	40	high	.	.	.	.	.	.	.
simulated 10x	validated	LAP3	ING4	+/+	-/-	4:17608493	12:6765964	CDS	splice-site	translocation	downstream	downstream	2	0	1	73	36	high	.	.	.	.	.	.	.
simulated 10x	validated	PIK3AP1	UPF2	-/-	-/-	10:98363736	10:12043824	splice-site	splice-site	deletion	upstream	downstream	1	1	1	6	13	high	.	.	.	.	.	.	.
simulated 10x	validated	NEU1	SUPT3H	-/-	-/-	6:31825436	6:45333038	exon	splice-site	duplication	upstream	downstream	0	1	2	7	37	high	.	.	.	.	.	.	.
simulated 10x	validated	PAPD5	MT1A	+/+	+/+	16:50258905	16:56673229	splice-site	CDS	deletion	downstream	upstream	1	0	2	21	0	high	.	.	.	.	.	.	.
simulated 10x	validated	WBP4	UNC5B	+/+	+/+	13:41646993	10:73052224	splice-site	splice-site	translocation	downstream	upstream	0	1	2	19	40	high	.	.	.	.	.	.	.
simulated 10x	validated	CDC20B	PHACTR4	-/-	+/+	5:54439341	1:28733921	splice-site	splice-site	translocation	upstream	upstream	1	1	1	7	36	high	.	.	.	.	.	.	.
simulated 10x	validated	IRAK1	XAGE2B	-/-	+/+	X:153284050	X:52115723	splice-site	CDS	inversion	upstream	upstream	0	2	1	123	3	high	.	.	.	.	.	.	.
simulated 10x	validated	MAPK1	RGL4	-/-	+/+	22:22127162	22:24040483	splice-site	CDS	inversion	upstream	upstream	1	0	1	82	5	high	.	.	low_entropy(1),mismappers(1)	.	.	.	.
simulated 10x	duplicate	RP11-161H23.9	MVK	-/+	+/+	12:49690739	12:110012612	exon	splice-site	deletion/3'-3'	downstream	upstream	0	1	1	7	23	high	.	.	.	.	.	.	.
simulated 10x	validated	CTSS	ACTN2	-/-	+/+	1:150730334	1:236924315	splice-site	splice-site	inversion	upstream	upstream	1	0	1	7	15	high	.	.	.	.	.	.	.
simulated 10x	non-validated	CD1D	UBQLN4P1	+/+	-/-	1:158149952	3:148704103	splice-site	exon	translocation	downstream	downstream	1	0	1	10	5	high	.	.	low_entropy(1)	.	.	.	.
simulated 10x	validated	CA6	MAGOH	+/+	-/-	1:9017304	1:53704171	CDS	5'UTR	inversion	downstream	downstream	2	4	5	7	120	medium	.	.	.	.	.	.	.
simulated 10x	validated	SPON1	CNGA4	+/+	+/+	11:14279316	11:6261838	exon	CDS	duplication	downstream	upstream	3	5	0	12	11	medium	.	.	.	.	.	.	.
simulated 10x	validated	TEX13A	FHL1	-/-	+/+	X:104463646	X:135229624	3'UTR	5'UTR	inversion	upstream	upstream	5	1	1	9	12	medium	.	.	.	.	.	.	.
simulated 10x	validated	TMEM132E	EPN2	+/+	+/+	17:32955685	17:19185375	CDS	5'UTR	duplication	downstream	upstream	2	3	1	9	36	medium	.	.	.	.	.	.	.
simulated 10x	validated	THRAP3	FAM78B	+/+	-/-	1:36762380	1:166039582	intron	CDS	inversion	downstream	downstream	2	3	1	144	6	medium	.	.	.	.	.	.	.
simulated 10x	non-validated	ETV3	CALML6	-/-	+/+	1:157105263	1:1846848	splice-site	exon	inversion	upstream	upstream	0	5	0	3	10	medium	.	.	.	.	.	.	.
simulated 10x	validated	FRG2C	WNT7A	+/+	-/-	3:75714303	3:13917429	CDS	exon	inversion	downstream	downstream	2	1	2	5	6	medium	.	.	.	.	.	.	.
simulated 10x	validated	TJAP1	NEDD9	+/+	-/-	6:43471405	6:11382571	CDS	5'UTR	inversion	downstream	downstream	2	2	0	88	6	medium	.	.	.	.	.	.	.
simulated 10x	validated	RYR1	GRIN3B	+/+	+/+	19:39057627	19:1007627	splice-site	splice-site	duplication	downstream	upstream	0	4	0	14	13	medium	.	.	.	.	.	.	.
simulated 10x	validated	KIFC1	MTFR2	+/+	-/-	6:33374390	6:136562818	CDS	intron	inversion	downstream	downstream	2	1	1	167	11	medium	.	.	mismatches(1)	.	.	.	.
simulated 10x	validated	ABHD14B	MCF2L2	-/-	-/-	3:52002569	3:182897969	3'UTR	exon	duplication	upstream	downstream	1	1	1	12	3	medium	.	.	.	.	.	.	.
simulated 10x	validated	REG3G	KCTD1	+/+	-/-	2:79254373	18:24039587	exon	CDS	translocation	downstream	downstream	0	0	3	6	0	medium	.	.	.	.	.	.	.
simulated 10x	validated	VWA5A	SAC3D1	+/+	+/+	11:123988406	11:64809086	CDS	CDS	duplication	downstream	upstream	0	3	0	28	18	medium	.	.	.	.	.	.	.
simulated 10x	validated	TGIF2LX	TREX2	+/+	-/-	X:89177878	X:152730453	3'UTR	5'UTR	inversion	downstream	downstream	0	0	3	7	1	medium	.	.	.	.	.	.	.
simulated 10x	duplicate	TGIF2LX	HAUS7	+/+	-/-	X:89177878	X:152730453	3'UTR	CDS	inversion	downstream	downstream	0	0	3	7	1	medium	.	.	.	.	.	.	.
simulated 10x	non-validated	AGAP4	SLC16A9	-/-	-/-	10:46339774	10:61444085	splice-site	splice-site	duplication	upstream	downstream	3	0	0	1	12	medium	.	.	.	.	.	.	.
simulated 10x	validated	UGT1A1	CDC42EP1	+/+	+/+	2:234675811	22:37960413	splice-site	5'UTR	translocation	downstream	upstream	2	0	0	6	2	medium	.	.	.	.	.	.	.
simulated 10x	duplicate	UGT1A10	CDC42EP1	+/+	+/+	2:234675811	22:37960413	splice-site	5'UTR	translocation	downstream	upstream	2	0	0	6	2	medium	.	.	.	.	.	.	.
simulated 10x	duplicate	UGT1A7	CDC42EP1	+/+	+/+	2:234675811	22:37960413	splice-site	5'UTR	translocation	downstream	upstream	2	0	0	6	2	medium	.	.	.	.	.	.	.
simulated 10x	duplicate	UGT1A6	CDC42EP1	+/+	+/+	2:234675811	22:37960413	splice-site	5'UTR	translocation	downstream	upstream	2	0	0	6	2	medium	.	.	.	.	.	.	.
simulated 10x	duplicate	UGT1A4	CDC42EP1	+/+	+/+	2:234675811	22:37960413	splice-site	5'UTR	translocation	downstream	upstream	2	0	0	6	2	medium	.	.	.	.	.	.	.
simulated 10x	duplicate	UGT1A9	CDC42EP1	+/+	+/+	2:234675811	22:37960413	splice-site	5'UTR	translocation	downstream	upstream	2	0	0	6	2	medium	.	.	.	.	.	.	.
simulated 10x	duplicate	UGT1A8	CDC42EP1	+/+	+/+	2:234675811	22:37960413	splice-site	5'UTR	translocation	downstream	upstream	2	0	0	6	2	medium	.	.	.	.	.	.	.
simulated 10x	duplicate	UGT1A3	CDC42EP1	+/+	+/+	2:234675811	22:37960413	splice-site	5'UTR	translocation	downstream	upstream	2	0	0	6	2	medium	.	.	.	.	.	.	.
simulated 10x	duplicate	UGT1A5	CDC42EP1	+/+	+/+	2:234675811	22:37960413	splice-site	5'UTR	translocation	downstream	upstream	2	0	0	6	2	medium	.	.	.	.	.	.	.
simulated 10x	validated	ATAD3C	GBP7	+/+	-/-	1:1389880	1:89641723	splice-site	5'UTR	inversion	downstream	downstream	2	0	0	11	1	medium	.	.	.	.	.	.	.
simulated 10x	validated	C1QTNF1	SHISA6	+/+	+/+	17:77045485	17:11461171	3'UTR	CDS	duplication	downstream	upstream	0	2	0	8	5	medium	.	.	.	.	.	.	.
simulated 10x	non-validated	MIR302B	MCM7	-/-	-/-	4:113569810	7:99691024	splice-site	splice-site	translocation	upstream	downstream	0	1	0	648	523	medium	.	.	.	.	.	.	.
simulated 10x	duplicate	MCM7	MIR302B	-/-	-/-	7:99691796	4:113568623	splice-site	splice-site	translocation	upstream	downstream	0	1	0	591	2355	medium	.	.	.	.	.	.	.
simulated 10x	non-validated	ZMYND8(12219),RP1-148H17.1(22887)	ZMYND8	./-	-/-	20:45997786	20:45938948	intergenic	splice-site	deletion/read-through	upstream	downstream	0	4	3	86	113	low	.	.	.	.	.	.	.
simulated 10x	non-validated	SLC13A5	MIR4520A(2470),SLC13A5(26734)	-/-	./-	17:6593240	17:6561298	exon	intergenic	deletion/read-through	upstream	downstream	0	0	3	3	5	low	.	.	.	.	.	.	.
simulated 10x	non-validated	ELMO1(43792),NECAP1P1(92459)	GPR141	./+	+/+	7:37532644	7:37779982	intergenic	splice-site	deletion/read-through	downstream	upstream	1	1	0	4	5	low	.	.	.	.	.	.	.
simulated 10x	validated	GAGE2C	MAGEB1	+/+	+/+	X:49230859	X:30268549	CDS	splice-site	duplication	downstream	upstream	0	2	0	0	8	low	.	.	.	.	.	.	.
simulated 10x	validated	CELF5	CYP4F8	+/+	+/+	19:3282265	19:15726427	splice-site	splice-site	deletion	downstream	upstream	0	1	1	18	5	low	.	.	.	.	.	.	.
simulated 10x	validated	HMOX1	ARHGAP8	+/+	+/+	22:35779219	22:45204187	splice-site	splice-site	deletion	downstream	upstream	1	1	0	78	37	low	.	.	.	.	.	.	.
simulated 10x	duplicate	HMOX1	PRR5-ARHGAP8	+/+	+/+	22:35779219	22:45204187	splice-site	splice-site	deletion	downstream	upstream	1	1	0	78	37	low	.	.	.	.	.	.	.
simulated 10x	non-validated	RMST	MIR302B	+/+	-/-	12:97954825	4:113568623	splice-site	splice-site	translocation	downstream	downstream	1	1	0	14	2355	low	.	.	.	.	.	.	.
simulated 10x	validated	TP53I3	ACVR1	-/-	-/-	2:24303689	2:158634854	splice-site	splice-site	duplication	upstream	downstream	1	0	0	61	32	low	.	.	.	.	.	.	.
simulated 150x	validated	CYB561D1	PIGT	+/+	+/+	1:110036909	20:44048776	splice-site	splice-site	translocation	downstream	upstream	37	38	35	100	249	high	.	.	low_entropy(2)	.	.	.	.
simulated 150x	validated	SS18L1	AC138430.4	+/+	-/-	20:60749700	19:19373605	splice-site	exon	translocation	downstream	downstream	34	38	31	118	91	high	.	.	.	.	.	.	.
simulated 150x	duplicate	SS18L1	HAPLN4	+/+	-/-	20:60749700	19:19373605	splice-site	5'UTR	translocation	downstream	downstream	34	38	31	118	91	high	.	.	.	.	.	.	.
simulated 150x	validated	IL37	TACR1	+/+	-/-	2:113674825	2:75278442	splice-site	CDS	inversion	downstream	downstream	32	33	34	81	61	high	.	.	mismatches(1)	.	.	.	.
simulated 150x	validated	PSMD8	ICAM1	+/+	+/+	19:38866872	19:10394866	splice-site	CDS	duplication	downstream	upstream	34	33	32	457	115	high	.	.	duplicates(1),low_entropy(1)	.	.	.	.
simulated 150x	validated	RASSF4	THAP8	+/+	-/-	10:45486525	19:36526494	CDS	splice-site	translocation	downstream	downstream	43	26	29	102	109	high	.	.	duplicates(1),low_entropy(1)	.	.	.	.
simulated 150x	validated	INPP5E	CAMSAP1	-/-	-/-	9:139327607	9:138758382	splice-site	splice-site	deletion	upstream	downstream	35	30	33	37	134	high	.	.	duplicates(1),mismatches(1)	.	.	.	.
simulated 150x	validated	GIGYF2	PCGF1	+/+	-/-	2:233625269	2:74732737	splice-site	splice-site	inversion	downstream	downstream	38	33	26	131	114	high	.	.	duplicates(2),mismappers(2),mismatches(1)	.	.	.	.
simulated 150x	validated	MTF2	KPNA6	+/+	+/+	1:93545088	1:32622454	splice-site	splice-site	duplication	downstream	upstream	27	34	36	185	127	high	.	.	mismappers(1),mismatches(2)	.	.	.	.
simulated 150x	validated	SMARCC1	SH3RF3	-/-	+/+	3:47652037	2:109964131	exon	splice-site	translocation	upstream	upstream	33	22	42	94	99	high	.	.	.	.	.	.	.
simulated 150x	validated	THAP6	BBS7	+/+	-/-	4:76442189	4:122770028	splice-site	CDS	inversion	downstream	downstream	31	31	34	93	96	high	.	.	mismatches(1)	.	.	.	.
simulated 150x	validated	DGKD	PTPRN	+/+	-/-	2:234343545	2:220172279	splice-site	splice-site	inversion	downstream	downstream	35	30	31	104	98	high	.	.	low_entropy(2)	.	.	.	.
simulated 150x	validated	PPIB	TM2D3	-/-	-/-	15:64448924	15:102190362	splice-site	splice-site	duplication	upstream	downstream	24	38	34	1388	125	high	.	.	duplicates(1),low_entropy(4),mismatches(2)	.	.	.	.
simulated 150x	validated	TMED8	FLYWCH1	-/-	+/+	14:77818016	16:3000226	splice-site	3'UTR	translocation	upstream	upstream	32	25	38	113	104	high	.	.	duplicates(1),low_entropy(1),mismappers(3)	.	.	.	.
simulated 150x	validated	CTDSPL2	ADAL	+/+	+/+	15:44788656	15:43639214	splice-site	splice-site	duplication	downstream	upstream	32	41	21	117	95	high	.	.	.	.	.	.	.
simulated 150x	validated	AKT2	PIK3R2	-/-	+/+	19:40741797	19:18272776	splice-site	splice-site	inversion	upstream	upstream	24	35	35	202	122	high	.	.	.	.	.	.	.
simulated 150x	duplicate	AKT2	PIK3R2	-/-	+/+	19:40741797	19:18272776	splice-site	splice-site	inversion	upstream	upstream	24	35	35	202	122	high	.	.	.	.	.	.	.
simulated 150x	non-validated	ECI2	ZC3H12D	-/-	-/-	6:4115922	6:149773857	3'UTR	splice-site	duplication	upstream	downstream	28	33	32	97	94	high	.	.	.	.	.	.	.
simulated 150x	validated	KCNH5	AKT1	-/-	-/-	14:63269047	14:105240304	splice-site	CDS	duplication	upstream	downstream	39	29	24	89	145	high	.	.	low_entropy(2),mismappers(1)	.	.	.	.
simulated 150x	validated	SPON1	CNGA4	+/+	+/+	11:14279316	11:6261838	exon	CDS	duplication	downstream	upstream	21	40	31	75	104	high	.	.	.	.	.	.	.
simulated 150x	validated	SACS	SYNJ2	-/-	+/+	13:23949258	6:158480286	splice-site	intron	translocation	upstream	upstream	30	32	29	107	93	high	.	.	low_entropy(1)	.	.	.	.
simulated 150x	validated	UGT1A1	CDC42EP1	+/+	+/+	2:234675811	22:37960413	splice-site	5'UTR	translocation	downstream	upstream	33	31	27	68	102	high	.	.	.	.	.	.	.
simulated 150x	duplicate	UGT1A10	CDC42EP1	+/+	+/+	2:234675811	22:37960413	splice-site	5'UTR	translocation	downstream	upstream	33	31	27	68	102	high	.	.	.	.	.	.	.
simulated 150x	duplicate	UGT1A9	CDC42EP1	+/+	+/+	2:234675811	22:37960413	splice-site	5'UTR	translocation	downstream	upstream	33	31	27	68	102	high	.	.	.	.	.	.	.
simulated 150x	duplicate	UGT1A7	CDC42EP1	+/+	+/+	2:234675811	22:37960413	splice-site	5'UTR	translocation	downstream	upstream	33	31	27	68	102	high	.	.	.	.	.	.	.
simulated 150x	duplicate	UGT1A6	CDC42EP1	+/+	+/+	2:234675811	22:37960413	splice-site	5'UTR	translocation	downstream	upstream	33	31	27	68	102	high	.	.	.	.	.	.	.
simulated 150x	duplicate	UGT1A5	CDC42EP1	+/+	+/+	2:234675811	22:37960413	splice-site	5'UTR	translocation	downstream	upstream	33	31	27	68	102	high	.	.	.	.	.	.	.
simulated 150x	duplicate	UGT1A4	CDC42EP1	+/+	+/+	2:234675811	22:37960413	splice-site	5'UTR	translocation	downstream	upstream	33	31	27	68	102	high	.	.	.	.	.	.	.
simulated 150x	duplicate	UGT1A3	CDC42EP1	+/+	+/+	2:234675811	22:37960413	splice-site	5'UTR	translocation	downstream	upstream	33	31	27	68	102	high	.	.	.	.	.	.	.
simulated 150x	duplicate	UGT1A8	CDC42EP1	+/+	+/+	2:234675811	22:37960413	splice-site	5'UTR	translocation	downstream	upstream	33	31	27	68	102	high	.	.	.	.	.	.	.
simulated 150x	validated	PPP5C	ARMC6	+/+	+/+	19:46888167	19:19165087	splice-site	CDS	duplication	downstream	upstream	29	36	26	261	203	high	.	.	.	.	.	.	.
simulated 150x	validated	UQCRC2	POLR2C	+/+	+/+	16:21991941	16:57496299	CDS	5'UTR	deletion	downstream	upstream	30	29	32	340	95	high	.	.	duplicates(1),mismatches(1)	.	.	.	.
simulated 150x	validated	GDPD2	MTMR8	+/+	-/-	X:69652468	X:63579408	CDS	splice-site	inversion	downstream	downstream	31	30	29	159	84	high	.	.	.	.	.	.	.
simulated 150x	validated	SELENBP1	IARS2	-/-	+/+	1:151338878	1:220316286	CDS	splice-site	inversion	upstream	upstream	31	33	26	123	170	high	.	.	duplicates(1),mismatches(2)	.	.	.	.
simulated 150x	validated	OCA2	TAC1	-/-	+/+	15:28326794	7:97364138	splice-site	splice-site	translocation	upstream	upstream	22	29	38	92	102	high	.	.	duplicates(1),low_entropy(2),mismatches(2)	.	.	.	.
simulated 150x	validated	TSN	PDE9A	+/+	+/+	2:122513529	21:44188298	splice-site	splice-site	translocation	downstream	upstream	27	39	23	79	136	high	.	.	low_entropy(1),mismatches(1)	.	.	.	.
simulated 150x	validated	MYBPHL	MIER1	-/-	+/+	1:109840044	1:67424534	splice-site	splice-site	inversion	upstream	upstream	35	24	29	112	113	high	.	.	duplicates(1),low_entropy(2)	.	.	.	.
simulated 150x	validated	HOXD3	MSH6	+/+	+/+	2:177034326	2:48023033	CDS	splice-site	duplication	downstream	upstream	34	25	29	77	198	high	.	.	low_entropy(1),mismatches(1)	.	.	.	.
simulated 150x	validated	TXNDC5	GUCA1A	-/-	+/+	6:7888938	6:42146981	splice-site	splice-site	inversion	upstream	upstream	31	20	37	241	126	high	.	.	mismatches(2)	.	.	.	.
simulated 150x	validated	KRT4	TAOK3	-/-	-/-	12:53201550	12:118650799	CDS	splice-site	duplication	upstream	downstream	29	31	27	94	100	high	.	.	low_entropy(1)	.	.	.	.
simulated 150x	validated	ACP5	FUZ	-/-	-/-	19:11688465	19:50314724	5'UTR	splice-site	duplication	upstream	downstream	26	36	25	88	134	high	.	.	duplicates(1),mismatches(1)	.	.	.	.
simulated 150x	validated	PSMD6	RAD54L2	-/-	+/+	3:64008139	3:51664721	CDS	splice-site	inversion	upstream	upstream	33	28	25	303	128	high	.	.	low_entropy(1)	.	.	.	.
simulated 150x	duplicate	BLOC1S5-TXNDC5	GUCA1A	-/-	+/+	6:7888938	6:42146981	splice-site	splice-site	inversion	upstream	upstream	29	20	37	241	126	high	.	.	mismatches(2)	.	.	.	.
simulated 150x	validated	CA6	MAGOH	+/+	-/-	1:9017304	1:53704171	CDS	5'UTR	inversion	downstream	downstream	27	32	27	80	188	high	.	.	duplicates(1),low_entropy(1),mismatches(1)	.	.	.	.
simulated 150x	validated	UNC5CL	INO80E	-/-	+/+	6:40996291	16:30012735	CDS	splice-site	translocation	upstream	upstream	25	32	28	96	132	high	.	.	duplicates(1),low_entropy(1),mismatches(1)	.	.	.	.
simulated 150x	validated	TJAP1	NEDD9	+/+	-/-	6:43471405	6:11382571	CDS	5'UTR	inversion	downstream	downstream	26	34	25	153	84	high	.	.	.	.	.	.	.
simulated 150x	validated	THRAP3	FAM78B	+/+	-/-	1:36762383	1:166039579	intron	CDS	inversion	downstream	downstream	23	37	25	201	111	high	.	.	.	.	.	.	.
simulated 150x	validated	PIK3AP1	UPF2	-/-	-/-	10:98363736	10:12043824	splice-site	splice-site	deletion	upstream	downstream	29	30	25	82	85	high	.	.	duplicates(1)	.	.	.	.
simulated 150x	validated	YTHDF2	CHIA	+/+	+/+	1:29063659	1:111860608	splice-site	splice-site	deletion	downstream	upstream	37	28	19	237	102	high	.	.	duplicates(1)	.	.	.	.
simulated 150x	validated	TCTEX1D1	RFC5	+/+	+/+	1:67241987	12:118455800	CDS	splice-site	translocation	downstream	upstream	26	27	30	79	102	high	.	.	low_entropy(2),mismatches(1)	.	.	.	.
simulated 150x	validated	AHR	ZNF3	+/+	-/-	7:17370510	7:99672884	splice-site	splice-site	inversion	downstream	downstream	27	32	24	75	116	high	.	.	inconsistently_clipped(1),low_entropy(1),mismatches(1)	.	.	.	.
simulated 150x	validated	TEX13A	FHL1	-/-	+/+	X:104463646	X:135229624	3'UTR	5'UTR	inversion	upstream	upstream	30	24	29	99	95	high	.	.	duplicates(1)	.	.	.	.
simulated 150x	validated	GRIN1	DNLZ	+/+	-/-	9:140053169	9:139257580	exon	splice-site	inversion	downstream	downstream	33	25	24	82	132	high	.	.	.	.	.	.	.
simulated 150x	validated	PHOSPHO2	HTR4	+/+	-/-	2:170551757	5:147902793	splice-site	CDS	translocation	downstream	downstream	26	35	21	82	92	high	.	.	duplicates(1),low_entropy(1),mismappers(2),mismatches(2)	.	.	.	.
simulated 150x	duplicate	KLHL23	HTR4	+/+	-/-	2:170551757	5:147902793	splice-site	CDS	translocation	downstream	downstream	26	35	21	82	92	high	.	.	duplicates(1),low_entropy(1),mismappers(2),mismatches(2)	.	.	.	.
simulated 150x	validated	CHAD	CACNG5	-/-	+/+	17:48542655	17:64876672	splice-site	splice-site	inversion	upstream	upstream	29	26	26	98	85	high	.	.	mismatches(3)	.	.	.	.
simulated 150x	validated	WIPF2	TAOK1	+/+	+/+	17:38418892	17:27825381	splice-site	CDS	duplication	downstream	upstream	22	30	29	89	141	high	.	.	low_entropy(1)	.	.	.	.
simulated 150x	validated	REV1	NEK4	-/-	-/-	2:100019106	3:52786085	splice-site	splice-site	translocation	upstream	downstream	29	32	20	88	114	high	.	.	mismatches(1)	.	.	.	.
simulated 150x	validated	TLE1	RALGDS	-/-	-/-	9:84226684	9:136037919	splice-site	splice-site	duplication	upstream	downstream	26	27	28	141	88	high	.	.	mismatches(2)	.	.	.	.
simulated 150x	duplicate	TLE1	GBGT1	-/-	-/-	9:84226684	9:136037919	splice-site	splice-site	duplication	upstream	downstream	26	27	28	141	88	high	.	.	mismatches(2)	.	.	.	.
simulated 150x	validated	HMOX1	ARHGAP8	+/+	+/+	22:35779219	22:45204187	splice-site	splice-site	deletion	downstream	upstream	30	34	17	157	126	high	.	.	.	.	.	.	.
simulated 150x	duplicate	HMOX1	PRR5-ARHGAP8	+/+	+/+	22:35779219	22:45204187	splice-site	splice-site	deletion	downstream	upstream	30	34	17	157	126	high	.	.	.	.	.	.	.
simulated 150x	validated	FAM177B	RORC	+/+	-/-	1:222920423	1:151803447	splice-site	CDS	inversion	downstream	downstream	30	27	23	63	64	high	.	.	low_entropy(1)	.	.	.	.
simulated 150x	validated	PHKB	SPNS3	+/+	+/+	16:47533705	17:4381867	CDS	splice-site	translocation	downstream	upstream	30	31	19	102	97	high	.	.	mismatches(1)	.	.	.	.
simulated 150x	validated	ZBTB9	TIMM17A	+/+	+/+	6:33422552	1:201926639	splice-site	splice-site	translocation	downstream	upstream	24	31	24	100	276	high	.	.	mismatches(2)	.	.	.	.
simulated 150x	validated	LARP4	HOXC6	+/+	+/+	12:50867861	12:54422360	CDS	splice-site	deletion	downstream	upstream	25	25	29	113	105	high	.	.	duplicates(1),low_entropy(3)	.	.	.	.
simulated 150x	validated	MDS2	HP1BP3	+/+	-/-	1:23954488	1:21076375	splice-site	splice-site	inversion	downstream	downstream	25	27	27	72	147	high	.	.	mismatches(1)	.	.	.	.
simulated 150x	validated	GIMAP6	EPHA1	-/-	-/-	7:150324807	7:143092275	3'UTR	splice-site	deletion	upstream	downstream	23	21	35	93	270	high	.	.	.	.	.	.	.
simulated 150x	validated	CENPV	PTRH2	-/-	-/-	17:16252565	17:57775339	UTR	splice-site	duplication	upstream	downstream	14	35	30	65	187	high	.	.	.	.	.	.	.
simulated 150x	validated	MBNL3	G6PD	-/-	-/-	X:131524957	X:153762375	CDS	splice-site	duplication	upstream	downstream	22	36	20	88	198	high	.	.	duplicates(2)	.	.	.	.
simulated 150x	validated	VOPP1	ZKSCAN1	-/-	+/+	7:55565306	7:99613204	splice-site	5'UTR	inversion	upstream	upstream	25	32	21	146	85	high	.	.	duplicates(1)	.	.	.	.
simulated 150x	validated	WBP4	UNC5B	+/+	+/+	13:41646993	10:73052224	splice-site	splice-site	translocation	downstream	upstream	21	27	30	85	142	high	.	.	.	.	.	.	.
simulated 150x	validated	SYT9	CEACAM4	+/+	-/-	11:7335172	19:42126615	splice-site	splice-site	translocation	downstream	downstream	24	32	21	77	90	high	.	.	duplicates(1),low_entropy(1)	.	.	.	.
simulated 150x	validated	LIN9	SV2A	-/-	-/-	1:226420797	1:149881125	splice-site	splice-site	deletion	upstream	downstream	31	17	29	102	125	high	.	.	duplicates(1),mismatches(6)	.	.	.	.
simulated 150x	validated	NSUN3	FAM160A1	+/+	+/+	3:93803294	4:152487290	splice-site	splice-site	translocation	downstream	upstream	37	10	29	128	91	high	.	.	mismappers(2),mismatches(2)	.	.	.	.
simulated 150x	validated	TMED5	ATF3	-/-	+/+	1:93617415	1:212792700	3'UTR	splice-site	inversion	upstream	upstream	28	21	27	70	96	high	.	.	duplicates(3),low_entropy(2)	.	.	.	.
simulated 150x	validated	GALP	BRINP3	+/+	-/-	19:56697144	1:190250880	3'UTR	splice-site	translocation	downstream	downstream	28	20	28	79	89	high	.	.	mismappers(1)	.	.	.	.
simulated 150x	validated	PVALB	SCARA5	-/-	-/-	22:37211147	8:27762351	splice-site	splice-site	translocation	upstream	downstream	32	28	16	87	76	high	.	.	duplicates(1)	.	.	.	.
simulated 150x	validated	RAPGEF5	OGDH	-/-	+/+	7:22306583	7:44646194	splice-site	5'UTR	inversion	upstream	upstream	30	21	25	112	117	high	.	.	low_entropy(1)	.	.	.	.
simulated 150x	validated	QKI	ZUFSP	+/+	-/-	6:163983101	6:116987858	splice-site	CDS	inversion	downstream	downstream	25	36	14	202	98	high	.	.	.	.	.	.	.
simulated 150x	validated	C1QTNF1	SHISA6	+/+	+/+	17:77045486	17:11461172	3'UTR	CDS	duplication	downstream	upstream	33	25	17	86	79	high	.	.	.	.	.	.	.
simulated 150x	validated	MASP1	PPIC	-/-	-/-	3:186969422	5:122372420	splice-site	5'UTR	translocation	upstream	downstream	26	22	27	88	89	high	.	.	low_entropy(3)	.	.	.	.
simulated 150x	validated	MAPKAPK3	TBCCD1	+/+	-/-	3:50684256	3:186272873	splice-site	splice-site	inversion	downstream	downstream	32	28	15	203	86	high	.	.	mismatches(1)	.	.	.	.
simulated 150x	validated	SLC45A3	KCND3	-/-	-/-	1:205626979	1:112323413	3'UTR	splice-site	deletion	upstream	downstream	23	30	22	72	85	high	.	.	duplicates(1),low_entropy(1),mismatches(1)	.	.	.	.
simulated 150x	validated	BRCC3	SRSF5	+/+	+/+	X:154348443	14:70234874	splice-site	CDS	translocation	downstream	upstream	26	22	27	65	631	high	.	.	mismappers(2)	.	.	.	.
simulated 150x	validated	VWA5A	SAC3D1	+/+	+/+	11:123988406	11:64809086	CDS	CDS	duplication	downstream	upstream	31	21	22	121	112	high	.	.	mismatches(1)	.	.	.	.
simulated 150x	validated	LRRFIP1	GALNT3	+/+	-/-	2:238662122	2:166650760	splice-site	5'UTR	inversion	downstream	downstream	22	20	32	126	89	high	.	.	.	.	.	.	.
simulated 150x	validated	GPBP1	PPARGC1B	+/+	+/+	5:56531838	5:149227021	CDS	splice-site	deletion	downstream	upstream	27	28	19	164	94	high	.	.	.	.	.	.	.
simulated 150x	non-validated	PHYHIPL	RP11-53M11.3	+/+	+/+	10:60937378	8:55471745	splice-site	exon	translocation	downstream	upstream	28	28	17	75	82	high	.	.	mismatches(1)	.	.	.	.
simulated 150x	validated	CELF5	CYP4F8	+/+	+/+	19:3282265	19:15726427	splice-site	splice-site	deletion	downstream	upstream	16	29	28	73	96	high	.	.	.	.	.	.	.
simulated 150x	validated	WWC1	ETF1	+/+	-/-	5:167868826	5:137878626	CDS	splice-site	inversion	downstream	downstream	26	18	29	96	190	high	.	.	duplicates(1),low_entropy(6)	.	.	.	.
simulated 150x	validated	CSMD2	GBP5	-/-	-/-	1:34280897	1:89728468	splice-site	splice-site	duplication	upstream	downstream	18	32	22	76	72	high	.	.	duplicates(2)	.	.	.	.
simulated 150x	validated	UACA	ADPGK	-/-	-/-	15:70969447	15:73048788	splice-site	splice-site	duplication	upstream	downstream	26	21	25	86	109	high	.	.	low_entropy(1),mismatches(1)	.	.	.	.
simulated 150x	validated	ACVR2B	LMLN	+/+	+/+	3:38520696	3:197710814	CDS	splice-site	deletion	downstream	upstream	29	19	24	135	77	high	.	.	.	.	.	.	.
simulated 150x	validated	MED6	WISP2	-/-	+/+	14:71063328	20:43355728	splice-site	splice-site	translocation	upstream	upstream	15	24	32	177	122	high	.	.	duplicates(2),inconsistently_clipped(1),mismappers(2)	.	.	.	.
simulated 150x	validated	VRK2	ITGB1BP1	+/+	-/-	2:58366966	2:9548534	splice-site	intron	inversion	downstream	downstream	14	23	34	97	93	high	.	.	duplicates(1),low_entropy(1),mismappers(3)	.	.	.	.
simulated 150x	validated	AMOT	CLCN5	-/-	+/+	X:112025768	X:49845251	splice-site	splice-site	inversion	upstream	upstream	29	26	16	97	96	high	.	.	duplicates(1)	.	.	.	.
simulated 150x	duplicate	CTD-2540L5.5	WISP2	-/-	+/+	14:71063328	20:43355728	splice-site	splice-site	translocation	upstream	upstream	15	24	32	177	122	high	.	.	duplicates(2),inconsistently_clipped(1),mismappers(2)	.	.	.	.
simulated 150x	validated	SEPT8	RASA1	-/-	+/+	5:132091697	5:86659165	3'UTR	splice-site	inversion	upstream	upstream	25	24	22	86	92	high	.	.	low_entropy(4),mismatches(3)	.	.	.	.
simulated 150x	validated	RYR1	GRIN3B	+/+	+/+	19:39057627	19:1007627	splice-site	splice-site	duplication	downstream	upstream	29	23	19	91	84	high	.	.	duplicates(1),low_entropy(4),mismatches(1)	.	.	.	.
simulated 150x	validated	UCHL1	CASP3	+/+	-/-	4:41266178	4:185550655	splice-site	splice-site	inversion	downstream	downstream	29	26	16	1630	164	high	.	.	.	.	.	.	.
simulated 150x	validated	CAPRIN2	ELOVL4	-/-	-/-	12:30876193	6:80657023	splice-site	5'UTR	translocation	upstream	downstream	27	19	24	111	54	high	.	.	low_entropy(1),mismatches(1)	.	.	.	.
simulated 150x	validated	PRKRIP1	MUC3A	+/+	+/+	7:102067113	7:100552886	3'UTR	splice-site	duplication	downstream	upstream	19	28	22	94	92	high	.	.	low_entropy(4),mismatches(1)	.	.	.	.
simulated 150x	validated	BTF3	RELL2	+/+	+/+	5:72795027	5:141020238	splice-site	splice-site	deletion	downstream	upstream	29	15	25	1523	170	high	.	.	low_entropy(3),mismatches(1)	.	.	.	.
simulated 150x	validated	SNHG3	NFASC	+/+	+/+	1:28836145	1:204951012	exon	CDS	deletion	downstream	upstream	27	22	20	126	86	high	.	.	mismappers(13)	.	.	.	.
simulated 150x	validated	BOD1L1	GRPEL1	-/-	-/-	4:13610153	4:7069273	splice-site	exon	deletion	upstream	downstream	23	21	24	88	82	high	.	.	low_entropy(2),mismatches(1)	.	.	.	.
simulated 150x	validated	PRPH	MVK	+/+	+/+	12:49690739	12:110012612	CDS	splice-site	deletion	downstream	upstream	18	19	30	90	111	high	.	.	.	.	.	.	.
simulated 150x	validated	JMY	AP3S1	+/+	+/+	5:78596141	5:115205714	splice-site	splice-site	deletion	downstream	upstream	9	28	30	60	128	high	.	.	mismatches(1)	.	.	.	.
simulated 150x	validated	CLCA1	MARK3	+/+	+/+	1:86947915	14:103946724	CDS	splice-site	translocation	downstream	upstream	24	20	22	76	196	high	.	.	mismatches(1)	.	.	.	.
simulated 150x	validated	SLC35E3	MLXIP	+/+	+/+	12:69153019	12:122625505	splice-site	CDS	deletion	downstream	upstream	23	25	17	102	91	high	.	.	low_entropy(2)	.	.	.	.
simulated 150x	non-validated	ETV3	CALML6	-/-	+/+	1:157105263	1:1846848	splice-site	exon	inversion	upstream	upstream	27	23	14	41	91	high	.	.	.	.	.	.	.
simulated 150x	validated	ENPP5	SLC17A1	-/-	-/-	6:46138545	6:25832287	splice-site	5'UTR	deletion	upstream	downstream	23	17	24	92	71	high	.	.	.	.	.	.	.
simulated 150x	validated	NBL1	NECAP2	+/+	+/+	1:19983403	1:16775635	splice-site	CDS	duplication	downstream	upstream	33	15	15	89	72	high	.	.	duplicates(1),mismatches(1)	.	.	.	.
simulated 150x	validated	PICK1	CBX6	+/+	-/-	22:38453539	22:39263207	5'UTR	splice-site	inversion	downstream	downstream	21	23	18	44	89	high	.	.	low_entropy(2)	.	.	.	.
simulated 150x	validated	LAP3	ING4	+/+	-/-	4:17608493	12:6765964	CDS	splice-site	translocation	downstream	downstream	26	9	27	147	116	high	.	.	duplicates(1)	.	.	.	.
simulated 150x	validated	GSPT1	GAN	-/-	+/+	16:11976872	16:81385188	splice-site	splice-site	inversion	upstream	upstream	18	25	18	249	91	high	.	.	mismatches(1)	.	.	.	.
simulated 150x	validated	ALDH1A2	MYO5A	-/-	-/-	15:58245630	15:52615642	3'UTR	splice-site	deletion	upstream	downstream	23	14	23	90	73	high	.	.	low_entropy(1),mismappers(6)	.	.	.	.
simulated 150x	validated	RREB1	CYHR1	+/+	-/-	6:7240776	8:145689994	CDS	splice-site	translocation	downstream	downstream	15	27	18	74	117	high	.	.	.	.	.	.	.
simulated 150x	validated	LHPP	PAOX	+/+	+/+	10:126186697	10:135193503	splice-site	splice-site	deletion	downstream	upstream	22	22	16	124	90	high	.	.	low_entropy(4)	.	.	.	.
simulated 150x	validated	TYRP1	CLCN6	+/+	+/+	9:12704705	1:11879545	splice-site	splice-site	translocation	downstream	upstream	19	19	21	85	123	high	.	.	low_entropy(1)	.	.	.	.
simulated 150x	validated	KHDRBS2	SYTL1	-/-	+/+	6:62407100	1:27676238	splice-site	CDS	translocation	upstream	upstream	13	25	21	84	73	high	.	.	mismatches(13)	.	.	.	.
simulated 150x	validated	ITGA3	CSHL1	+/+	-/-	17:48151367	17:61987594	splice-site	CDS	inversion	downstream	downstream	0	25	32	120	67	high	.	.	.	.	.	.	.
simulated 150x	validated	TREM2	HBS1L	-/-	-/-	6:41127530	6:135371785	splice-site	splice-site	duplication	upstream	downstream	22	12	23	86	134	high	.	.	duplicates(1),low_entropy(1)	.	.	.	.
simulated 150x	validated	CDC20B	PHACTR4	-/-	+/+	5:54439341	1:28733921	splice-site	splice-site	translocation	upstream	upstream	21	12	21	96	116	high	.	.	mismappers(2),mismatches(1)	.	.	.	.
simulated 150x	validated	NEU1	SUPT3H	-/-	-/-	6:31825436	6:45333038	exon	splice-site	duplication	upstream	downstream	28	7	18	74	63	high	.	.	.	.	.	.	.
simulated 150x	validated	RRAGB	UBA1	+/+	+/+	X:55777798	X:47070435	exon	splice-site	duplication	downstream	upstream	13	23	17	72	578	high	.	.	low_entropy(2),mismatches(1)	.	.	.	.
simulated 150x	validated	FAM72A	RGS1	+/+	+/+	1:206145578	1:192547352	splice-site	splice-site	duplication	downstream	upstream	24	0	28	95	83	high	.	.	mismatches(1)	.	.	.	.
simulated 150x	validated	AFM	ANXA3	+/+	+/+	4:74353454	4:79507414	CDS	splice-site	deletion	downstream	upstream	18	3	31	12	109	high	.	.	duplicates(1),mismatches(4)	.	.	.	.
simulated 150x	validated	PAPD5	MT1A	+/+	+/+	16:50258905	16:56673229	splice-site	CDS	deletion	downstream	upstream	7	13	32	76	0	high	.	.	low_entropy(2)	.	.	.	.
simulated 150x	validated	SNRPG	ORC2	-/-	-/-	2:70520752	2:201790633	splice-site	CDS	duplication	upstream	downstream	36	4	11	427	97	high	.	.	.	.	.	.	.
simulated 150x	validated	UBR4	AMT	-/-	-/-	1:19421400	3:49459824	splice-site	CDS	translocation	upstream	downstream	14	17	20	259	146	high	.	.	low_entropy(1),mismatches(1)	.	.	.	.
simulated 150x	validated	CYTIP	OTUD3	-/-	+/+	2:158300359	1:20209006	splice-site	5'UTR	translocation	upstream	upstream	18	18	14	67	74	high	.	.	duplicates(1),low_entropy(1)	.	.	.	.
simulated 150x	validated	MYO3B	COX5B	+/+	+/+	2:171070993	2:98262980	splice-site	splice-site	duplication	downstream	upstream	33	1	15	76	93	high	.	.	duplicates(1),mismappers(44),mismatches(1)	.	.	.	.
simulated 150x	validated	SIGLEC1	TBC1D2B	-/-	-/-	20:3667617	15:78290697	3'UTR	splice-site	translocation	upstream	downstream	7	30	11	67	103	high	.	.	duplicates(1),low_entropy(6)	.	.	.	.
simulated 150x	validated	CPVL	ANAPC5	-/-	-/-	7:29160673	12:121756226	CDS	splice-site	translocation	upstream	downstream	6	9	33	0	250	high	.	.	mismatches(2)	.	.	.	.
simulated 150x	validated	TP53I3	ACVR1	-/-	-/-	2:24303689	2:158634854	splice-site	splice-site	duplication	upstream	downstream	17	15	16	142	99	high	.	.	low_entropy(2)	.	.	.	.
simulated 150x	non-validated	ATAD3A	GBP7	+/+	-/-	1:1458279	1:89641723	splice-site	5'UTR	inversion	downstream	downstream	0	28	20	95	74	high	.	.	duplicates(1)	.	.	.	.
simulated 150x	validated	CTSS	ACTN2	-/-	+/+	1:150730334	1:236924315	splice-site	splice-site	inversion	upstream	upstream	17	13	17	89	101	high	.	.	duplicates(1),mismappers(1)	.	.	.	.
simulated 150x	validated	KIFC1	MTFR2	+/+	-/-	6:33374394	6:136562814	CDS	splice-site	inversion	downstream	downstream	18	19	10	234	80	high	.	.	low_entropy(2),mismatches(1)	.	.	.	.
simulated 150x	validated	DLD	NPTX2	+/+	+/+	7:107545503	7:98256477	splice-site	splice-site	duplication	downstream	upstream	19	13	14	142	106	high	.	.	.	.	.	.	.
simulated 150x	validated	UGT3A2	RBM4	-/-	+/+	5:36051972	11:66406214	splice-site	5'UTR	translocation	upstream	upstream	9	9	27	98	27	high	.	.	.	.	.	.	.
simulated 150x	validated	REG3G	KCTD1	+/+	-/-	2:79254376	18:24035865	exon	splice-site	translocation	downstream	downstream	3	21	20	66	76	high	.	.	.	.	.	.	.
simulated 150x	validated	TSC2	ACSM2A	+/+	+/+	16:2112983	16:20471428	CDS	splice-site	deletion	downstream	upstream	12	7	24	67	62	high	.	.	duplicates(1),mismatches(3)	.	.	.	.
simulated 150x	validated	IRAK1	XAGE2B	-/-	+/+	X:153284050	X:52115723	splice-site	CDS	inversion	upstream	upstream	0	23	16	213	33	high	.	.	mismatches(1)	.	.	.	.
simulated 150x	duplicate	UGT3A2	RBM14-RBM4	-/-	+/+	5:36051972	11:66406214	splice-site	intron	translocation	upstream	upstream	9	3	27	98	27	high	.	.	.	.	.	.	.
simulated 150x	validated	MAPK1	RGL4	-/-	+/+	22:22127162	22:24040483	splice-site	CDS	inversion	upstream	upstream	29	3	5	174	93	high	.	.	low_entropy(1),mismappers(61),mismatches(7)	.	.	.	.
simulated 150x	non-validated	CD1D	UBQLN4P1	+/+	-/-	1:158149952	3:148704103	splice-site	exon	translocation	downstream	downstream	31	0	6	73	6	high	.	.	duplicates(2),low_entropy(1)	.	.	.	.
simulated 150x	non-validated	SPATA31A4	CYLC2	-/-	+/+	9:41327145	9:105767248	splice-site	intron	inversion	upstream	upstream	16	0	18	70	91	high	.	.	.	.	.	.	.
simulated 150x	duplicate	RP11-161H23.9	MVK	-/+	+/+	12:49690739	12:110012612	exon	splice-site	deletion/3'-3'	downstream	upstream	3	19	10	90	111	high	.	.	.	.	.	.	.
simulated 150x	validated	TGIF2LX	HAUS7	+/+	-/-	X:89177882	X:152730456	splice-site	CDS	inversion	downstream	downstream	8	0	23	55	1	high	.	.	low_entropy(7)	.	.	.	.
simulated 150x	duplicate	TGIF2LX	TREX2	+/+	-/-	X:89177882	X:152730456	splice-site	5'UTR	inversion	downstream	downstream	8	0	23	55	1	high	.	.	low_entropy(7)	.	.	.	.
simulated 150x	validated	SSX2B	BIVM-ERCC5	+/+	+/+	X:52781826	13:103473387	splice-site	splice-site	translocation	downstream	upstream	22	1	8	26	88	high	.	.	duplicates(1),mismatches(1)	.	.	.	.
simulated 150x	duplicate	SSX2B	BIVM	+/+	+/+	X:52781826	13:103473387	splice-site	splice-site	translocation	downstream	upstream	22	1	8	26	88	high	.	.	duplicates(1),mismatches(1)	.	.	.	.
simulated 150x	validated	TNPO1	FAM173B	+/+	-/-	5:72179060	5:10249979	splice-site	CDS	inversion	downstream	downstream	12	0	19	199	0	high	.	.	duplicates(1),low_entropy(2),mismatches(1)	.	.	.	.
simulated 150x	validated	RPS6KB1	SLC25A51	+/+	-/-	17:58022879	9:37888589	splice-site	splice-site	translocation	downstream	downstream	19	0	9	87	88	high	.	.	.	.	.	.	.
simulated 150x	non-validated	STAMBP	RGPD2	+/+	-/-	2:74071986	2:88115940	CDS	splice-site	inversion	downstream	downstream	0	17	11	72	23	high	.	.	mismappers(1)	.	.	.	.
simulated 150x	duplicate	RP11-178C3.1	SLC25A51	+/+	-/-	17:58022879	9:37888589	splice-site	splice-site	translocation	downstream	downstream	19	0	9	87	88	high	.	.	.	.	.	.	.
simulated 150x	validated	RPGRIP1L	NOB1	-/-	-/-	16:53692365	16:69786274	CDS	splice-site	duplication	upstream	downstream	0	6	21	0	209	high	.	.	low_entropy(1),mismatches(2)	.	.	.	.
simulated 150x	non-validated	CBWD2	PDLIM5	+/+	+/+	2:114251571	4:95373037	splice-site	5'UTR	translocation	downstream	upstream	14	0	12	22	70	high	.	.	low_entropy(1)	.	.	.	.
simulated 150x	non-validated	RGPD3	ROCK2	-/-	-/-	2:107051093	2:11335242	splice-site	exon	deletion	upstream	downstream	17	0	8	23	54	high	.	.	.	.	.	.	.
simulated 150x	non-validated	AGAP4	SLC16A9	-/-	-/-	10:46339774	10:61444085	splice-site	splice-site	duplication	upstream	downstream	7	0	5	7	56	high	.	.	.	.	.	.	.
simulated 150x	duplicate	AGAP4	SLC16A9	-/-	-/-	10:46342135	10:61444085	splice-site	splice-site	duplication	upstream	downstream	2	0	0	3	56	medium	.	.	.	.	.	.	.
simulated 150x	validated	ETV3L	CALML6	-/-	+/+	1:157068932	1:1846849	splice-site	exon	inversion	upstream	upstream	4	1	5	9	91	high	.	.	.	.	.	.	.
simulated 150x	non-validated	CELF5	CYP4F23P	+/+	+/+	19:3282265	19:15674883	splice-site	5'UTR	deletion	downstream	upstream	2	1	0	73	1	high	.	.	.	.	.	.	.
simulated 150x	validated	FRG2C	WNT7A	+/+	-/-	3:75714303	3:13917429	CDS	exon	inversion	downstream	downstream	30	19	30	79	86	medium	.	.	duplicates(1)	.	.	.	.
simulated 150x	validated	ABHD14B	MCF2L2	-/-	-/-	3:52002569	3:182897969	3'UTR	exon	duplication	upstream	downstream	18	25	26	101	72	medium	.	.	low_entropy(2)	.	.	.	.
simulated 150x	validated	TMEM132E	EPN2	+/+	+/+	17:32955685	17:19185375	CDS	5'UTR	duplication	downstream	upstream	8	23	25	66	84	medium	.	.	mismatches(8)	.	.	.	.
simulated 150x	validated	STX6	LNX2	-/-	-/-	1:180953888	13:28127470	CDS	CDS	translocation	upstream	downstream	16	14	19	0	91	medium	.	.	mismatches(7)	.	.	.	.
simulated 150x	non-validated	NES	DISP1	-/.	+/.	1:156578105	1:223101782	intron	5'UTR	inversion	upstream	upstream	1	0	33	1	81	medium	.	.	.	.	.	.	.
simulated 150x	duplicate	BTF3	FCHSD1	+/+	-/+	5:72795027	5:141020243	CDS	3'UTR	deletion/5'-5'	downstream	upstream	0	0	29	1523	188	medium	.	.	.	.	.	.	.
simulated 150x	duplicate	MINOS1-NBL1	NECAP2	+/+	+/+	1:19983403	1:16775635	CDS	CDS	duplication	downstream	upstream	7	5	15	89	72	medium	.	.	duplicates(1),mismatches(1)	.	.	.	.
simulated 150x	validated	GRIN1	CARD9	+/+	-/-	9:140053145	9:139257584	CDS	exon	inversion	downstream	downstream	0	0	23	98	84	medium	.	.	.	.	.	.	.
simulated 150x	validated	IGF2BP1	LRRC37A2	+/+	+/+	17:47114022	17:44590076	exon	5'UTR	duplication	downstream	upstream	0	16	2	54	27	medium	.	.	duplicates(3)	.	.	.	.
simulated 150x	validated	GAGE2C	MAGEB1	+/+	+/+	X:49230861	X:30268551	CDS	splice-site	duplication	downstream	upstream	0	16	0	1	73	medium	.	.	.	.	.	.	.
simulated 150x	non-validated	TBC1D3H	TMC6	-/-	-/-	17:34748575	17:76122640	CDS	CDS	duplication	upstream	downstream	10	0	5	6	94	medium	.	.	.	.	.	.	.
simulated 150x	validated	RPS6KB1	RP11-613M10.9	+/+	-/-	17:58022842	9:37899831	CDS	3'UTR	translocation	downstream	downstream	0	0	13	103	1	medium	.	.	.	.	.	.	.
simulated 150x	duplicate	RP11-178C3.1	RP11-613M10.9	+/+	-/-	17:58022842	9:37899831	CDS	3'UTR	translocation	downstream	downstream	0	0	13	103	1	medium	.	.	.	.	.	.	.
simulated 150x	non-validated	MCM7	MIR302B	-/-	-/-	7:99691796	4:113568623	splice-site	splice-site	translocation	upstream	downstream	0	1	0	591	2355	medium	.	.	.	.	.	.	.
simulated 150x	duplicate	MIR302B	MCM7	-/-	-/-	4:113569810	7:99691024	splice-site	splice-site	translocation	upstream	downstream	0	1	0	648	523	medium	.	.	.	.	.	.	.
simulated 150x	non-validated	ZMYND8(12219),RP1-148H17.1(22887)	ZMYND8	./-	-/-	20:45997786	20:45938948	intergenic	splice-site	deletion/read-through	upstream	downstream	0	4	3	86	113	low	.	.	.	.	.	.	.
simulated 150x	non-validated	SLC13A5	MIR4520A(2470),SLC13A5(26734)	-/-	./-	17:6593240	17:6561298	exon	intergenic	deletion/read-through	upstream	downstream	0	0	3	3	5	low	.	.	.	.	.	.	.
simulated 150x	non-validated	ELMO1(43792),NECAP1P1(92459)	GPR141	./+	+/+	7:37532644	7:37779982	intergenic	splice-site	deletion/read-through	downstream	upstream	1	1	0	4	5	low	.	.	.	.	.	.	.
simulated 150x	non-validated	RMST	MIR302B	+/+	-/-	12:97954825	4:113568623	splice-site	splice-site	translocation	downstream	downstream	1	1	0	14	2355	low	.	.	.	.	.	.	.
simulated 200x	validated	SELENBP1	IARS2	-/-	+/+	1:151338878	1:220316286	CDS	splice-site	inversion	upstream	upstream	58	48	39	165	183	high	.	.	duplicates(2)	.	.	.	.
simulated 200x	validated	CA6	MAGOH	+/+	-/-	1:9017304	1:53704171	CDS	5'UTR	inversion	downstream	downstream	51	44	41	119	216	high	.	.	duplicates(1),low_entropy(1)	.	.	.	.
simulated 200x	validated	SACS	SYNJ2	-/-	+/+	13:23949258	6:158480286	splice-site	intron	translocation	upstream	upstream	42	50	41	139	138	high	.	.	duplicates(2),low_entropy(2)	.	.	.	.
simulated 200x	validated	CYB561D1	PIGT	+/+	+/+	1:110036909	20:44048776	splice-site	splice-site	translocation	downstream	upstream	37	48	45	107	291	high	.	.	duplicates(2),mismatches(1)	.	.	.	.
simulated 200x	validated	CHAD	CACNG5	-/-	+/+	17:48542655	17:64876672	splice-site	splice-site	inversion	upstream	upstream	43	45	40	124	130	high	.	.	duplicates(1),mismatches(5)	.	.	.	.
simulated 200x	validated	OCA2	TAC1	-/-	+/+	15:28326794	7:97364138	splice-site	splice-site	translocation	upstream	upstream	42	34	51	132	117	high	.	.	duplicates(1),low_entropy(1),mismatches(2)	.	.	.	.
simulated 200x	validated	GIGYF2	PCGF1	+/+	-/-	2:233625269	2:74732737	splice-site	splice-site	inversion	downstream	downstream	45	43	39	171	148	high	.	.	duplicates(2),mismappers(1),mismatches(1)	.	.	.	.
simulated 200x	validated	PSMD8	ICAM1	+/+	+/+	19:38866872	19:10394866	splice-site	CDS	duplication	downstream	upstream	29	59	39	457	148	high	.	.	low_entropy(1),mismatches(2)	.	.	.	.
simulated 200x	validated	IL37	TACR1	+/+	-/-	2:113674825	2:75278442	splice-site	CDS	inversion	downstream	downstream	40	37	48	116	93	high	.	.	duplicates(1)	.	.	.	.
simulated 200x	validated	RASSF4	THAP8	+/+	-/-	10:45486525	19:36526494	CDS	splice-site	translocation	downstream	downstream	45	43	37	115	143	high	.	.	low_entropy(1),mismatches(1)	.	.	.	.
simulated 200x	validated	SMARCC1	SH3RF3	-/-	+/+	3:47652038	2:109964130	exon	splice-site	translocation	upstream	upstream	35	44	45	120	147	high	.	.	.	.	.	.	.
simulated 200x	validated	CLCA1	MARK3	+/+	+/+	1:86947915	14:103946724	CDS	splice-site	translocation	downstream	upstream	50	47	26	88	220	high	.	.	duplicates(1)	.	.	.	.
simulated 200x	validated	DGKD	PTPRN	+/+	-/-	2:234343545	2:220172279	splice-site	splice-site	inversion	downstream	downstream	40	42	40	128	136	high	.	.	low_entropy(4)	.	.	.	.
simulated 200x	validated	PPIB	TM2D3	-/-	-/-	15:64448924	15:102190362	splice-site	splice-site	duplication	upstream	downstream	43	32	47	1420	154	high	.	.	duplicates(1),low_entropy(3),mismatches(1)	.	.	.	.
simulated 200x	validated	BRCC3	SRSF5	+/+	+/+	X:154348443	14:70234874	splice-site	CDS	translocation	downstream	upstream	55	38	28	115	673	high	.	.	mismappers(5),mismatches(1)	.	.	.	.
simulated 200x	validated	GDPD2	MTMR8	+/+	-/-	X:69652469	X:63579407	CDS	splice-site	inversion	downstream	downstream	43	45	32	182	109	high	.	.	duplicates(1),mismatches(1)	.	.	.	.
simulated 200x	validated	ZBTB9	TIMM17A	+/+	+/+	6:33422552	1:201926639	splice-site	splice-site	translocation	downstream	upstream	48	33	38	136	309	high	.	.	duplicates(2),low_entropy(1)	.	.	.	.
simulated 200x	validated	ACP5	FUZ	-/-	-/-	19:11688465	19:50314724	5'UTR	splice-site	duplication	upstream	downstream	33	56	30	99	165	high	.	.	mismatches(1)	.	.	.	.
simulated 200x	validated	PHKB	SPNS3	+/+	+/+	16:47533705	17:4381867	CDS	splice-site	translocation	downstream	upstream	38	39	41	133	154	high	.	.	duplicates(3),mismappers(1),mismatches(2)	.	.	.	.
simulated 200x	non-validated	PHYHIPL	RP11-53M11.3	+/+	+/+	10:60937378	8:55471745	splice-site	exon	translocation	downstream	upstream	42	49	26	96	112	high	.	.	mismatches(1)	.	.	.	.
simulated 200x	validated	HOXD3	MSH6	+/+	+/+	2:177034326	2:48023033	CDS	splice-site	duplication	downstream	upstream	39	39	39	117	226	high	.	.	duplicates(2),mismatches(1)	.	.	.	.
simulated 200x	validated	TEX13A	FHL1	-/-	+/+	X:104463646	X:135229624	3'UTR	5'UTR	inversion	upstream	upstream	53	30	32	136	115	high	.	.	mismatches(1)	.	.	.	.
simulated 200x	validated	MYBPHL	MIER1	-/-	+/+	1:109840044	1:67424534	splice-site	splice-site	inversion	upstream	upstream	45	26	43	153	154	high	.	.	low_entropy(2)	.	.	.	.
simulated 200x	validated	GRIN1	DNLZ	+/+	-/-	9:140053169	9:139257580	exon	splice-site	inversion	downstream	downstream	45	43	25	110	149	high	.	.	duplicates(1),mismatches(2)	.	.	.	.
simulated 200x	validated	RAPGEF5	OGDH	-/-	+/+	7:22306583	7:44646194	splice-site	5'UTR	inversion	upstream	upstream	32	40	41	127	149	high	.	.	duplicates(1),low_entropy(3),mismatches(1)	.	.	.	.
simulated 200x	validated	TXNDC5	GUCA1A	-/-	+/+	6:7888938	6:42146981	splice-site	splice-site	inversion	upstream	upstream	36	39	38	274	170	high	.	.	mismatches(1)	.	.	.	.
simulated 200x	validated	THRAP3	FAM78B	+/+	-/-	1:36762380	1:166039582	intron	CDS	inversion	downstream	downstream	41	45	27	271	95	high	.	.	low_entropy(5),mismatches(1)	.	.	.	.
simulated 200x	validated	THAP6	BBS7	+/+	-/-	4:76442189	4:122770028	splice-site	CDS	inversion	downstream	downstream	48	32	32	114	105	high	.	.	duplicates(3),mismappers(1),mismatches(1)	.	.	.	.
simulated 200x	validated	UGT1A1	CDC42EP1	+/+	+/+	2:234675811	22:37960413	splice-site	5'UTR	translocation	downstream	upstream	36	37	38	92	125	high	.	.	duplicates(2),mismatches(2)	.	.	.	.
simulated 200x	duplicate	UGT1A10	CDC42EP1	+/+	+/+	2:234675811	22:37960413	splice-site	5'UTR	translocation	downstream	upstream	36	37	38	92	125	high	.	.	duplicates(2),mismatches(2)	.	.	.	.
simulated 200x	duplicate	UGT1A7	CDC42EP1	+/+	+/+	2:234675811	22:37960413	splice-site	5'UTR	translocation	downstream	upstream	36	37	38	92	125	high	.	.	duplicates(2),mismatches(2)	.	.	.	.
simulated 200x	duplicate	UGT1A6	CDC42EP1	+/+	+/+	2:234675811	22:37960413	splice-site	5'UTR	translocation	downstream	upstream	36	37	38	92	125	high	.	.	duplicates(2),mismatches(2)	.	.	.	.
simulated 200x	duplicate	UGT1A4	CDC42EP1	+/+	+/+	2:234675811	22:37960413	splice-site	5'UTR	translocation	downstream	upstream	36	37	38	92	125	high	.	.	duplicates(2),mismatches(2)	.	.	.	.
simulated 200x	duplicate	UGT1A9	CDC42EP1	+/+	+/+	2:234675811	22:37960413	splice-site	5'UTR	translocation	downstream	upstream	36	37	38	92	125	high	.	.	duplicates(2),mismatches(2)	.	.	.	.
simulated 200x	duplicate	UGT1A8	CDC42EP1	+/+	+/+	2:234675811	22:37960413	splice-site	5'UTR	translocation	downstream	upstream	36	37	38	92	125	high	.	.	duplicates(2),mismatches(2)	.	.	.	.
simulated 200x	duplicate	UGT1A3	CDC42EP1	+/+	+/+	2:234675811	22:37960413	splice-site	5'UTR	translocation	downstream	upstream	36	37	38	92	125	high	.	.	duplicates(2),mismatches(2)	.	.	.	.
simulated 200x	duplicate	UGT1A5	CDC42EP1	+/+	+/+	2:234675811	22:37960413	splice-site	5'UTR	translocation	downstream	upstream	36	37	38	92	125	high	.	.	duplicates(2),mismatches(2)	.	.	.	.
simulated 200x	validated	PSMD6	RAD54L2	-/-	+/+	3:64008138	3:51664722	CDS	splice-site	inversion	upstream	upstream	40	30	41	335	151	high	.	.	duplicates(1),low_entropy(3)	.	.	.	.
simulated 200x	validated	ACVR2B	LMLN	+/+	+/+	3:38520696	3:197710814	CDS	splice-site	deletion	downstream	upstream	38	44	29	172	131	high	.	.	duplicates(2)	.	.	.	.
simulated 200x	validated	UQCRC2	POLR2C	+/+	+/+	16:21991941	16:57496299	CDS	5'UTR	deletion	downstream	upstream	41	41	29	366	104	high	.	.	low_entropy(7)	.	.	.	.
simulated 200x	validated	TCTEX1D1	RFC5	+/+	+/+	1:67241987	12:118455800	CDS	splice-site	translocation	downstream	upstream	32	43	35	91	141	high	.	.	duplicates(2),low_entropy(3),mismatches(2)	.	.	.	.
simulated 200x	validated	WIPF2	TAOK1	+/+	+/+	17:38418894	17:27825383	splice-site	CDS	duplication	downstream	upstream	31	40	39	115	159	high	.	.	duplicates(1),mismatches(1)	.	.	.	.
simulated 200x	validated	ALDH1A2	MYO5A	-/-	-/-	15:58245630	15:52615642	3'UTR	splice-site	deletion	upstream	downstream	45	29	36	125	99	high	.	.	mismappers(4)	.	.	.	.
simulated 200x	validated	TLE1	RALGDS	-/-	-/-	9:84226684	9:136037919	splice-site	splice-site	duplication	upstream	downstream	35	30	45	202	138	high	.	.	duplicates(1),mismatches(2)	.	.	.	.
simulated 200x	duplicate	TLE1	GBGT1	-/-	-/-	9:84226684	9:136037919	splice-site	splice-site	duplication	upstream	downstream	35	30	45	202	138	high	.	.	duplicates(1),mismatches(2)	.	.	.	.
simulated 200x	non-validated	ETV3	CALML6	-/-	+/+	1:157105262	1:1846849	splice-site	exon	inversion	upstream	upstream	39	37	33	74	140	high	.	.	mismatches(1)	.	.	.	.
simulated 200x	validated	TSN	PDE9A	+/+	+/+	2:122513529	21:44188298	splice-site	splice-site	translocation	downstream	upstream	42	32	35	139	140	high	.	.	duplicates(1),low_entropy(1),mismatches(1)	.	.	.	.
simulated 200x	validated	HMOX1	ARHGAP8	+/+	+/+	22:35779219	22:45204187	splice-site	splice-site	deletion	downstream	upstream	43	35	31	221	166	high	.	.	duplicates(1),mismatches(1)	.	.	.	.
simulated 200x	duplicate	BLOC1S5-TXNDC5	GUCA1A	-/-	+/+	6:7888938	6:42146981	splice-site	splice-site	inversion	upstream	upstream	32	39	38	274	170	high	.	.	mismatches(1)	.	.	.	.
simulated 200x	duplicate	HMOX1	PRR5-ARHGAP8	+/+	+/+	22:35779219	22:45204187	splice-site	splice-site	deletion	downstream	upstream	43	35	31	221	166	high	.	.	duplicates(1),mismatches(1)	.	.	.	.
simulated 200x	validated	AMOT	CLCN5	-/-	+/+	X:112025768	X:49845251	splice-site	splice-site	inversion	upstream	upstream	37	41	30	137	137	high	.	.	duplicates(1)	.	.	.	.
simulated 200x	validated	TMED8	FLYWCH1	-/-	+/+	14:77818016	16:3000226	splice-site	3'UTR	translocation	upstream	upstream	32	42	34	109	129	high	.	.	low_entropy(2),mismappers(3)	.	.	.	.
simulated 200x	validated	UNC5CL	INO80E	-/-	+/+	6:40996291	16:30012735	CDS	splice-site	translocation	upstream	upstream	38	39	31	112	148	high	.	.	duplicates(1),low_entropy(3),mismatches(1)	.	.	.	.
simulated 200x	validated	FRG2C	WNT7A	+/+	-/-	3:75714303	3:13917429	CDS	exon	inversion	downstream	downstream	35	35	38	100	121	high	.	.	duplicates(1),mismatches(1)	.	.	.	.
simulated 200x	validated	SPON1	CNGA4	+/+	+/+	11:14279316	11:6261838	exon	CDS	duplication	downstream	upstream	38	33	37	117	114	high	.	.	mismatches(2)	.	.	.	.
simulated 200x	non-validated	ECI2	ZC3H12D	-/-	-/-	6:4115922	6:149773857	3'UTR	splice-site	duplication	upstream	downstream	34	32	42	123	125	high	.	.	.	.	.	.	.
simulated 200x	validated	INPP5E	CAMSAP1	-/-	-/-	9:139327607	9:138758382	splice-site	splice-site	deletion	upstream	downstream	32	42	34	45	148	high	.	.	duplicates(2),mismappers(2),mismatches(1)	.	.	.	.
simulated 200x	validated	UBR4	AMT	-/-	-/-	1:19421400	3:49459824	splice-site	CDS	translocation	upstream	downstream	40	31	37	303	170	high	.	.	duplicates(1),low_entropy(1)	.	.	.	.
simulated 200x	validated	TJAP1	NEDD9	+/+	-/-	6:43471405	6:11382571	CDS	5'UTR	inversion	downstream	downstream	35	38	33	173	105	high	.	.	low_entropy(2)	.	.	.	.
simulated 200x	validated	PVALB	SCARA5	-/-	-/-	22:37211147	8:27762351	splice-site	splice-site	translocation	upstream	downstream	42	38	25	113	101	high	.	.	duplicates(3)	.	.	.	.
simulated 200x	validated	MBNL3	G6PD	-/-	-/-	X:131524957	X:153762375	CDS	splice-site	duplication	upstream	downstream	44	38	23	115	219	high	.	.	.	.	.	.	.
simulated 200x	validated	TMED5	ATF3	-/-	+/+	1:93617415	1:212792700	3'UTR	splice-site	inversion	upstream	upstream	38	33	33	118	135	high	.	.	low_entropy(3)	.	.	.	.
simulated 200x	validated	LIN9	SV2A	-/-	-/-	1:226420797	1:149881125	splice-site	splice-site	deletion	upstream	downstream	41	26	37	140	138	high	.	.	mismatches(5)	.	.	.	.
simulated 200x	validated	UACA	ADPGK	-/-	-/-	15:70969447	15:73048788	splice-site	splice-site	duplication	upstream	downstream	45	30	28	115	132	high	.	.	low_entropy(1)	.	.	.	.
simulated 200x	validated	PHOSPHO2	HTR4	+/+	-/-	2:170551757	5:147902793	splice-site	CDS	translocation	downstream	downstream	43	37	23	108	94	high	.	.	duplicates(1),low_entropy(2),mismappers(3),mismatches(1)	.	.	.	.
simulated 200x	validated	SLC45A3	KCND3	-/-	-/-	1:205626979	1:112323413	3'UTR	splice-site	deletion	upstream	downstream	33	38	32	96	104	high	.	.	low_entropy(5)	.	.	.	.
simulated 200x	validated	MAPKAPK3	TBCCD1	+/+	-/-	3:50684256	3:186272873	splice-site	splice-site	inversion	downstream	downstream	40	36	27	254	108	high	.	.	duplicates(1)	.	.	.	.
simulated 200x	validated	GPBP1	PPARGC1B	+/+	+/+	5:56531838	5:149227021	CDS	splice-site	deletion	downstream	upstream	42	26	35	209	157	high	.	.	low_entropy(2)	.	.	.	.
simulated 200x	validated	RRAGB	UBA1	+/+	+/+	X:55777798	X:47070435	exon	splice-site	duplication	downstream	upstream	31	29	43	114	617	high	.	.	low_entropy(1)	.	.	.	.
simulated 200x	duplicate	KLHL23	HTR4	+/+	-/-	2:170551757	5:147902793	splice-site	CDS	translocation	downstream	downstream	43	37	22	108	94	high	.	.	duplicates(1),low_entropy(2),mismappers(3),mismatches(1)	.	.	.	.
simulated 200x	validated	GIMAP6	EPHA1	-/-	-/-	7:150324806	7:143092274	3'UTR	splice-site	deletion	upstream	downstream	40	31	31	119	289	high	.	.	mismatches(1)	.	.	.	.
simulated 200x	validated	AHR	ZNF3	+/+	-/-	7:17370510	7:99672884	splice-site	splice-site	inversion	downstream	downstream	43	28	30	108	103	high	.	.	duplicates(2)	.	.	.	.
simulated 200x	validated	KCNH5	AKT1	-/-	-/-	14:63269047	14:105240304	splice-site	CDS	duplication	upstream	downstream	34	39	28	108	175	high	.	.	low_entropy(1),mismappers(1)	.	.	.	.
simulated 200x	validated	SLC35E3	MLXIP	+/+	+/+	12:69153020	12:122625506	splice-site	CDS	deletion	downstream	upstream	32	42	27	124	141	high	.	.	low_entropy(2),mismappers(1)	.	.	.	.
simulated 200x	validated	UCHL1	CASP3	+/+	-/-	4:41266178	4:185550655	splice-site	splice-site	inversion	downstream	downstream	31	32	38	1667	214	high	.	.	duplicates(1),mismatches(1)	.	.	.	.
simulated 200x	validated	PRPH	MVK	+/+	+/+	12:49690739	12:110012612	CDS	splice-site	deletion	downstream	upstream	42	29	29	110	129	high	.	.	.	.	.	.	.
simulated 200x	validated	ABHD14B	MCF2L2	-/-	-/-	3:52002569	3:182897969	3'UTR	exon	duplication	upstream	downstream	34	28	38	135	90	high	.	.	low_entropy(3)	.	.	.	.
simulated 200x	validated	CELF5	CYP4F8	+/+	+/+	19:3282265	19:15726427	splice-site	splice-site	deletion	downstream	upstream	32	36	32	112	144	high	.	.	duplicates(1)	.	.	.	.
simulated 200x	validated	PRKRIP1	MUC3A	+/+	+/+	7:102067113	7:100552886	3'UTR	splice-site	duplication	downstream	upstream	18	45	37	103	131	high	.	.	duplicates(2),low_entropy(2),mismatches(1)	.	.	.	.
simulated 200x	validated	AKT2	PIK3R2	-/-	+/+	19:40741797	19:18272776	splice-site	splice-site	inversion	upstream	upstream	31	33	35	239	137	high	.	.	duplicates(1)	.	.	.	.
simulated 200x	duplicate	AKT2	PIK3R2	-/-	+/+	19:40741797	19:18272776	splice-site	splice-site	inversion	upstream	upstream	31	33	35	239	137	high	.	.	duplicates(1)	.	.	.	.
simulated 200x	validated	MTF2	KPNA6	+/+	+/+	1:93545088	1:32622454	splice-site	splice-site	duplication	downstream	upstream	36	34	29	218	139	high	.	.	duplicates(1),low_entropy(5),mismappers(2),mismatches(2)	.	.	.	.
simulated 200x	validated	VWA5A	SAC3D1	+/+	+/+	11:123988406	11:64809086	CDS	CDS	duplication	downstream	upstream	33	40	25	107	120	high	.	.	.	.	.	.	.
simulated 200x	validated	KRT4	TAOK3	-/-	-/-	12:53201550	12:118650799	CDS	splice-site	duplication	upstream	downstream	38	26	33	113	118	high	.	.	duplicates(1),low_entropy(1)	.	.	.	.
simulated 200x	validated	MDS2	HP1BP3	+/+	-/-	1:23954488	1:21076375	splice-site	splice-site	inversion	downstream	downstream	36	35	26	93	159	high	.	.	duplicates(2),low_entropy(2)	.	.	.	.
simulated 200x	validated	SS18L1	AC138430.4	+/+	-/-	20:60749700	19:19373605	splice-site	exon	translocation	downstream	downstream	38	25	33	141	85	high	.	.	duplicates(2),low_entropy(2)	.	.	.	.
simulated 200x	validated	VOPP1	ZKSCAN1	-/-	+/+	7:55565306	7:99613204	splice-site	5'UTR	inversion	upstream	upstream	37	43	16	162	118	high	.	.	duplicates(1),mismatches(1)	.	.	.	.
simulated 200x	duplicate	SS18L1	HAPLN4	+/+	-/-	20:60749700	19:19373605	splice-site	5'UTR	translocation	downstream	downstream	38	25	33	141	85	high	.	.	duplicates(2),low_entropy(2)	.	.	.	.
simulated 200x	validated	SNHG3	NFASC	+/+	+/+	1:28836145	1:204951012	exon	CDS	deletion	downstream	upstream	26	36	34	132	117	high	.	.	mismappers(14)	.	.	.	.
simulated 200x	validated	BOD1L1	GRPEL1	-/-	-/-	4:13610153	4:7069273	splice-site	exon	deletion	upstream	downstream	35	35	25	109	102	high	.	.	low_entropy(3),mismatches(1)	.	.	.	.
simulated 200x	validated	GSPT1	GAN	-/-	+/+	16:11976872	16:81385188	splice-site	splice-site	inversion	upstream	upstream	35	37	23	267	102	high	.	.	.	.	.	.	.
simulated 200x	validated	ENPP5	SLC17A1	-/-	-/-	6:46138545	6:25832287	splice-site	5'UTR	deletion	upstream	downstream	34	31	29	104	89	high	.	.	duplicates(3)	.	.	.	.
simulated 200x	validated	VRK2	ITGB1BP1	+/+	-/-	2:58366967	2:9548533	splice-site	exon	inversion	downstream	downstream	28	32	34	112	116	high	.	.	duplicates(1),low_entropy(2),mismappers(2)	.	.	.	.
simulated 200x	validated	MASP1	PPIC	-/-	-/-	3:186969421	5:122372419	splice-site	5'UTR	translocation	upstream	downstream	33	25	36	123	102	high	.	.	duplicates(1),low_entropy(1)	.	.	.	.
simulated 200x	validated	CTDSPL2	ADAL	+/+	+/+	15:44788656	15:43639214	splice-site	splice-site	duplication	downstream	upstream	34	36	23	139	110	high	.	.	duplicates(1),mismatches(1)	.	.	.	.
[truncated: 1,343 more rows]

## Sheet: S4B deFuse
Supplemental Table S4B: Raw output of deFuse on all benchmark datasets and validation results.
sample	validation_result	cluster_id	splitr_sequence	splitr_count	splitr_span_pvalue	splitr_pos_pvalue	splitr_min_pvalue	adjacent	altsplice	break_adj_entropy1	break_adj_entropy2	break_adj_entropy_min	breakpoint_homology	breakseqs_estislands_percident	cdna_breakseqs_percident	deletion	est_breakseqs_percident	eversion	exonboundaries	expression1	expression2	gene1	gene2	gene_align_strand1	gene_align_strand2	gene_chromosome1	gene_chromosome2	gene_end1	gene_end2	gene_location1	gene_location2	gene_name1	gene_name2	gene_start1	gene_start2	gene_strand1	gene_strand2	genome_breakseqs_percident	genomic_break_pos1	genomic_break_pos2	genomic_ends1	genomic_ends2	genomic_starts1	genomic_starts2	genomic_strand1	genomic_strand2	interchromosomal	interrupted_index1	interrupted_index2
BT-474 (SRR064438)	validated	1282	AGAGGGGGGTCGCAAAGGGTGAGACATGGCCACCAGGCGTTTAACCGACGCTTTCTTGTTGTTGCGGAATAATTCCATCCAAAACCGGCAGCTGTTAGCCGAGCAAGT|TCAAAATGAGCCTGTTTGGAACAACCTCAGGTTTTGGAACCAGTGGGACCAGCATGTTTGGCAGTGCAACTACAGACAATCACAATCCCATGAAGG	7	0.77154459862309	0.493539697098702	0.563387483312537	N	N	3.74590761063082	3.51001030496889	3.51001030496889	2	0	0	N	0	Y	Y	3126	4021	STX16	RAE1	+	-	20	20	57254582	55954267	coding	utr5p	STX16	RAE1	57226328	55926066	+	+	0	57227143	55929088	57227145	55929178	57227038	55929090	+	-	N	-	-
BT-474 (SRR064438)	validated	519	GATTATGCAGCCCTGGGCACAGACTGTGGTGGTTGGTAGAGCCAGGCTAGGAGGAATACCTGTGGGAGTTGTTGCTGTAGAAACCCGAACAGTAGAACTAAGTATCCCAGCTGATCCAGCAAACCTGGATTCTGAAGCCAAG|CTCCAGCGATTCAAGCGCTCCCTCTCCCTCAAGACCATCCTCCGAAGTAAGAGCTTGGAGAACTTCTTCCTTCGCTCGGGCTCTGAGCTCAAGTGCCCCACCGAGGTGCTGCTGACGCCCCCAACCCCACTGCCCCCTCCCTCC	48	0.842021992978745	0.579092605753663	0.753916830953711	N	N	3.54552998930151	3.26100876128973	3.26100876128973	0	0	0	N	0	Y	Y	10634	983	ACACA	STAC2	+	-	17	17	35766909	37382125	coding	coding	ACACA	STAC2	35441923	37366789	-	-	0	35479453	37374426	35479549,35482663	37374426	35479453,35482619	37374283	-	+	N	-	-
BT-474 (SRR064438)	validated	543	CCGGGATCCCGAGCCAACTTGTTTCCTCCGTTAGTGGTGGGGAAGGGCTTATCCTTTTGTGGCGGATCTAGCTTCTCCTCGCCTTCAGGATGAAAGCTCAGGGGGAAACCGAGG|GTTTACCTTATGGGTGGGAGGAAGCTTACACAGCAGATGGAATCAAGTACTTCATCAATCATGTAACACAGACTACATCCTGGATCCATCCCGTG	7	0.700420626175573	1	0.65828049255568	N	N	3.39062026046193	3.5319270478477	3.39062026046193	0	0	0	N	0	N	Y	8691	344	MED1	STXBP4	+	-	17	17	37607539	53241646	coding	coding	MED1	STXBP4	37560538	53046088	-	+	0	37607291	53218671	37607404	53218728,53237193	37607291	53218671,53237158	-	-	N	-	-
BT-474 (SRR064438)	validated	537	TTGGAACGGTGTTTAATGAACAGGAATTTTGTACGTATTGGCAAGTGGTTTGTAAAGCCTTATGAAAAAGATGAAAAACCTATAAATAAAA|GGGAAAAAAAAAGGAAAAAAAAAACAATGCCAACAGCCCAGCGTCCGTGAGCAACCCAACAGTAACAAAGCATGCGTTCGGGATGGAGGAAGAACTTCAGCGAGAGGGAA	3	0.782288941426824	0.606463413575649	0.175246980659369	N	N	2.89149597505107	2.44161324466654	2.44161324466654	0	0	0	N	0	N	Y	660	493	MED13	BCAS3	+	-	17	17	60142643	59470199	coding	coding	MED13	BCAS3	60019966	58754814	-	+	0	60129898	59465979	60129985	59457932,59466069,59469355	60129899	59457932,59465979,59469338	-	-	N	-	-
BT-474 (SRR064438)	validated	1519	GTGTCTGCTCGGGGATACAGGTGTAGGTAAATCGAGTATTGTGTGGCGGTTTGTGGAAGACAGTTTTGATCCAAACATCAACCCAACAATAGGG|CTTTTGGAAATGCCAAGACAGCCCACAACAACAACTCCAGCCGGTTTGGGAAATTCATCCAAGTCAGCTACCTAGAGAGTGGCATCGTGAGAGGAGC	14	0.403087970668606	0.310404177569617	0.415660791783144	N	N	3.27192306858781	3.2793317813189	3.27192306858781	0	0	0	N	0	N	Y	1499	1286	RAB22A	MYO9B	+	-	20	19	56942563	17324103	coding	coding	RAB22A	MYO9B	56884752	17212466	+	+	0	56886178	17256207	56885068,56886178,56918774	17256301,17263456	56885062,56886099,56918774	17256208,17263454	+	-	Y	-	-
BT-474 (SRR064438)	non-validated	1184	CTCCAAACCTAGTTCTAATGCACTAAGTGGCACTGACTGCTGAACTGACGGGGTAGGCATTGGAGTTGCAAGCCCTGCATCTCCACCATCAATATCAAAGAGGTCATTCGGACTAATTCCACTCTCACTCAAAGCAGCAAGCAGTAAATCTTGCCCTGGCTCCACCAT|TTTCCCCGCGGGACCCGGCGCCAGCACAGCTCCTCCCGGGAGGTGTGAGTTTGAAGGACCAGAGGCGACTGGAGCGGAGGCGGCGGTGGCGGCGGCAGCAGCGGCGTCCTGCTCTGCCTACCTCCCCGCCGCC	3	0.0735206959549235	0.606463413575649	0.622180263491581	Y	Y	3.38809011260573	2.95960396827598	2.95960396827598	0	0.992506099686302	0	Y	0.992506099686302	N	N	534	0	SBNO1	RP13-942N8.1	-	-	12	12	123834988	123850660	coding	upstream	SBNO1	RP13-942N8.1	123773656	123849500	-	+	0	123834988	123849248	123832680,123834988	123849380	123832645,123834857	123849248	+	-	N	-	-
BT-474 (SRR064438)	validated	651	AGCATTAACGCTTCCCGCCCCGGTGACCTCTCAGGGGTCTCCCCGCCAAAGGTGCTCCGCCGCTAAGGAACATGGCGAAGGTGGAGCAGGTCCTGAGCCTCGAGCCGCAGCACGAGCTCAAATTCCGAG|CAAGTGCGGAGGCAAGACACATCAAAGCAGAGATGGGAAGTGAAAGAGCTCTCGTACTGGACAGATTAGCAAGCAATGTGGCAAAACGAAAAAGCTCAATGCCTCA	14	0.119359962935692	0.969464541711287	0.44608755642632	N	N	3.49015970162987	3.21228736308742	3.21228736308742	0	0	0	N	0	N	Y	3375	297	VAPB	IKZF3	+	-	20	17	57026157	38020441	coding	coding	VAPB	IKZF3	56964178	37921198	+	-	0	56964573	37934020	56964573	37934020	56964445	37933915	+	+	Y	-	-
BT-474 (SRR064438)	validated	860	GCTTCAGCCGGGCGGAGGGGTGTGAGCCCGGCCCGTGGCGGCCACGTCTCCCGGGAGATGCTGTGACGGACCCGCACGGGAGGAGCTCGCGCCTGGCCTGGCGACCCGGTGGACTCGGCCCGCGGCGGCGCGCTCACCCGCCCCGTTCAG|ATAAAGGCTGGTGGTGGGAGAATGCTATCGCTGCCCTGTTTCGGAGACACATTCCCGTCAGCTGGCTGATCCGCGCTACCCTGAGTGAGTCGGAAAACTTCGAAGCAGCTGTTGGCAAGTTGGCCAAGACTCCCCTTA	10	0.0302882229862301	0.886993471757594	0.396966133968362	N	N	3.07354122878139	3.41679307359967	3.07354122878139	0	0	0	N	0	N	Y	1562	576	AHCTF1	NAAA	+	-	1	4	247095280	76862204	utr5p	coding	AHCTF1	NAAA	247002400	76831809	-	-	0	247094880	76846964	247095029	76842276,76846964	247094880	76842216,76846888	-	+	Y	-	-
BT-474 (SRR064438)	validated	1327	AGAAGAAGCAGTGGTGCGCCAACTGCAAGAAGGAGGCCATCTTTTACTGCTGTTGGAACACTAGCTACTGTGACTACCCCTGCCAGCAAGCCCACTGGCCTGAGCACATGAAGTCCTGCACCCAGTCAG|GAGAAGGAGCGCTCCTGGCACCAGCAGGAGCTGGCAAAGGCTCTGGAGAGCTTAGAAAGGGAAAAAATGGAGCTGGAAATGAGGCTAAAGGAGCAGCAGACAGAAATGGAGGCCATCCAGGCCCAGAGGGAAGAAGAACGGAC	12	0.0459817533448511	0.741553624646171	0.32825438851394	N	N	3.3984700535705	3.26460248413936	3.26460248413936	0	0	0	N	0	N	Y	2743	2217	ZMYND8	CEP250	+	-	20	20	45985567	34099804	coding	coding	ZMYND8	CEP250	45837859	34042985	-	+	0	45852970	34078463	45853098	34078605	45852970	34078463	-	-	N	-	-
BT-474 (SRR064438)	validated	508	GCTCGCCGCTCCCGACCCTCCCGCGCCCCCGCCCTGCCGCGCTGCTCCCCGCCCAGCCGCGGGTCTGTGGTCCAAGCCGCCCCGAAGCAGCCCC|CAGATGAAAACTCGCTGGATTTTTCCTCCTGTATGTTACGGCCTGGGATTAAAAATGCTCAGGAGCTTGCCTGTGGAGTGTGCCTCTTGAATGTGGACTCGAGGAGCCGGAAAGAAGAGAAGCCTGCAGAAGAACATCC	27	0.077196614372251	0.444302403219493	0.369912681656891	N	N	3.18867520302942	3.67320333000993	3.18867520302942	0	0	0	Y	0	N	Y	1870	2973	TOB1	SYNRG	+	-	17	17	48945339	35969544	coding	coding	TOB1	SYNRG	48939584	35874900	-	-	0	48943419	35880751	48941321,48943508	35880317,35880750	48941321,48943419	35880289,35880641	-	+	N	-	-
BT-474 (SRR064438)	non-validated	26	TGGCCATGCACCACCACCCACAGAATTGAGAAAGAGCTATCAATCTGTCAATCCTGTCCGTGTCCAGGCTGGGTGAGGTTTCCCGT|GTTGAGTCAAATTAAGCTGCAGGCTCCACTCCTGGTGGTGCCCTTCTGTCAATTCCTTTAAGTTTCAGCTTTGCAACCATACTCCCCTCGGAACCCAAAA	1205	0.720317267683113	0.877266463637631	0.883519929622235	N	Y	3.33996070379583	3.67849247003875	3.33996070379583	92	0.895908469095884	0	N	0.895908469095884	N	N	0	1	CTD-2210P24.6	ANKRD30BL	+	+	11	2	45846809	133015542	downstream	intron	CTD-2210P24.6	ANKRD30BL	45834770	132905164	+	-	0.895908469095884	45848291	133012525	45848291	133012624	45848206	133012525	+	-	Y	-	-
BT-474 (SRR064438)	non-validated	1478	GGGCAACTTTGTCAACGGCATCCGGCGTGTCATTGCCAACCAGCAGCAGGTCCTGCAGCGGAACCTGGAGCAGGAGCAACAGCAACGAGGGATGGGGGGGTAGTGGTTACCCCGGGCTGGGCCCCTCCAGGAGTCACAGATGAGGCCCCCGCAGAGACTGGT|GACACGCTTCTGAGCAGGGGCCCCTGGGGACTTCGATTGCCCAGCAACA	17	0.986386241217318	0.910653514966675	0.451572335079875	N	Y	3.34359427943881	3.43614916339873	3.34359427943881	212	0.93906430496727	0.93906430496727	N	0.93906430496727	N	N	895	0	PTOV1	RP11-174O3.1	+	-	19	3	50363990	120026799	utr3p	downstream	PTOV1	RP11-174O3.1	50354138	120025573	+	+	0.93906430496727	50363595	120026861	50363440,50363595	120026903	50363350,50363525	120026861	+	-	Y	-	-
BT-474 (SRR064438)	non-validated	1264	AACACCACATGAACATATCTTTGGCCCACACCCTTAATGGCAGGGATGGTAAAGGCTGTTTTCCACTGCCCATCGATGATGGTGTTGAGTACTCACAAAATATGCTGGAACTTTTCAGGGATCACTAGAGAC|ATGGCGGCAGCACAAGCGGCGGCGTGTAGG	4	0.684593373867851	0.955955835909475	0.98280003352011	N	Y	3.44871903508266	3.18111235777962	3.18111235777962	163	0.668711656441718	0.469938650306749	N	0.668711656441718	N	N	121	0	TTC7B	RP11-234A1.1	+	+	14	3	91282823	101295791	intron	intron	TTC7B	RP11-234A1.1	91006932	101295333	-	-	0.668711656441718	91232877	101295790	91232986	101295815	91232877	101295790	-	-	Y	-	-
BT-474 (SRR064438)	non-validated	779	GTGGTGTTGAGGTTACGGTCTGTTAGTAGTATAGTGATGCCAGCGGCTAGGACTGGGAGAGATAGGAGAAGTAAGACTGCTGTGATTAGGACGGATCAGACGAAAAGGGGCGTTTGGTATTGGGTT|TTAAGCAGGAGGTGTCAGAAAAGTTACCACAGGGATAACTGGCTTGTGGCGGCCAAGCGTTCATAGCGACGTCGCTTTTTGATCCTTCGATGTCGGC	14	0.978621053086475	0.632309558838437	0.11875786231565	N	N	3.39640391403072	3.54552998930151	3.39640391403072	0	0	0	N	0	Y	N	3	0	RP5-857K21.4	HFM1	+	-	1	1	659930	91870426	intron	intron	RP5-857K21.4	HFM1	536816	91726323	-	-	0	566981	91852951	567106	91852951	566981	91852855	-	+	N	-	-
BT-474 (SRR064438)	validated	546	CCTGGAACTGCACACGGAACTCAGGATTCTTCCGGATCTCCTGCTTGTGTTTGCTGGCAAATTCCTCCAGGTTGGTCTTGAACATGTCCAACTGCTTTGACATCTGGGCTAGCTGGTCCTCAGCCAAGACCGTCCCTCGCTCCTTATACTTGGCC|CCCTCCTCCAGCTCATCCTCAGAGCCCGCGTCCTCTGGCTGGTCCAGGTCTATGTCAAACACTCCTGCCATGTCCTCAGCTTCCCTGTCTCGGAAGTCCGGGGCTGGGTAAAAGCCGTCCCG	34	0.218527897538055	0.782700608374025	0.808466047810996	N	N	3.67593181695901	3.10865033796007	3.10865033796007	0	0	0	N	0	N	Y	3062	1017	SNF8	RPS6KB1	-	+	17	17	47022479	58027925	coding	coding	SNF8	RPS6KB1	47006678	57970447	-	+	0	47021337	57970686	47018424,47021337,47022043	57970685	47018322,47021287,47022043	57970564	+	+	N	-	-
BT-474 (SRR064438)	non-validated	970	CAGTGGCTCGCCTCATGGCGGACTGCCCGCCCGCTCCCAAGATCCAACTAGGAGCTTTTTAACTGCAGCAACTTTAATATACGCTATTGGAGCTGGAATTACCGCGGCTGCTGGCAC|CAGACTTGCCCTCCAATTGATCCTCATTAAAAGATTTAAAGTGCACTCATTCCAAT	1270	0.673271831021596	0.27227958513641	0.80614272459424	N	Y	3.59887818012334	3.36447795254773	3.36447795254773	174	0.627155172413793	0	N	0.822454844006568	N	N	3	1	LINC00273	ANKRD30BL	+	+	16	2	33962503	133015542	upstream	intron	LINC00273	ANKRD30BL	33961052	132905164	-	-	0.857963875205254	33963109	133013158	33963205	133013197	33963109	133013158	-	-	Y	-	-
BT-474 (SRR064438)	non-validated	1000	TGGGCAGCCAGTCTGGGCCCTTCTCAGGATCCTCATCTCCATCCTCATCCTCTTCCTTCACAGCATTTACTTGGAGCTCTTTGTGACACACCATGTCAGTCATGATGAATCGGCCAACAGCCAGCCCTTGCCAGCTGACGTCACAGTCTAAGATGGGAAACTG|GTACAGATAGACATGAAGAGAGCTTAGCAGTGGTTGAGGTGGTGACTA	7	0.910499700676884	0.538906482317054	0.422687221324227	N	Y	3.65384724021086	3.44503202627719	3.44503202627719	212	0.958529874213837	0.958529874213837	N	0.958529874213837	N	N	582	644	GGA2	ZFAND5	+	-	16	9	23533316	74980163	utr3p	utr3p	GGA2	ZFAND5	23474863	74966341	-	-	0.958529874213837	23478000	74966608	23478162	74966608	23478000	74966565	-	+	Y	-	-
BT-474 (SRR064438)	non-validated	330	TTTTGAAGGCCAAAGTGGAGAAGGATTCCATGTGAAAAGCAGTTGAACAT|GGGTCAGTCGGTCCTGAGAGATGGGCGAGCGCCGTTCCGAAGGGACAGGCAATGGCCTCCCTTGCCCTCAGCGGATCGAAAGGGAGTCGGGTTCAGATCCCCGAATCCGGAGTGGCGGAGATGGGC	5888	0.875324475944934	0.442044252857478	0.809552479374398	N	N	3.36464578641707	3.38656252929588	3.36464578641707	0	0.343728813559322	0	N	0.821016949152542	N	N	0	0	AC004448.5	PID1	-	-	17	2	19364305	230136001	intron	intron	AC004448.5	PID1	19342456	229715242	-	-	0.482937853107345	19355701	230045614	19355701	230045614	19355660	230045489	+	+	Y	-	-
BT-474 (SRR064438)	non-validated	213	CGGACCAGAGCTAAAGCATTTGCCAAGAATGTTTTCATTAACCAAGAACGAAAGTCGGAGTTTCGAAGACGATCAGATACCGTCGTTGTTCCGACCATAAACGATGCCAACTGGTGATGCAGCGGTGTTATTTCCATGACCCGCTGGGCAGCTTCCCAGAAACCAAAGTCTTTGGGTT|CCGAGGGGAGTATGGTTGCAAAGCTGAAACTTAAAGGAATTGACAGAAGGGCACCACCAGGAGTGGAGCCTGCAG	2011	0.0478767257575325	0.976892314412889	0.955506832047907	N	Y	3.29752682027208	3.49318436302603	3.29752682027208	254	0.78750656167979	0	N	0.774225721784777	N	N	0	1	RNA18S5	ANKRD30BL	-	-	Y	2	10036711	133015542	downstream	intron	RNA18S5	ANKRD30BL	10036113	132905164	-	-	0.920314960629921	10036006	133012615	10036006	133012615	10035829	133012560	+	+	Y	-	-
BT-474 (SRR064438)	non-validated	1132	CAGCGAGGGAGCTGCTCTGCTATGTACGAAACCCCGACCCAGAAGCAG|GTCGTCTACGAATGGTTTAGCGCCAGGTTCCCCACGAACGTGCGTTGCGTGACGGGCGAGAGGGCGGCCGCCTTTCCGGCCGCGCCCCGTTTCCCAGGACAAAGGGCACTCCGCACCGGACCCTGGTCCCAGC	1021	0.744600470970429	0.825844020537265	0.975770645749029	N	Y	3.48743121468078	3.73552766966605	3.48743121468078	182	0.937843406593406	0	N	0.81353021978022	N	N	387	0	TXNL4A	AC079949.1	+	+	18	12	77793949	127650672	intron	downstream	TXNL4A	AC079949.1	77732867	127650616	-	-	0.937843406593406	77772981	127650539	77773028	127650666	77772981	127650539	-	-	Y	-	-
BT-474 (SRR064438)	duplicate	1483	CAGGTTTTTAAAAGGCTTTATTGGGGAAACGTAGAGGGGTGGGGACCGTCCTTGGAGGCCTCAGGACACCATCCTCCATGTTGCTGGGCAGTTGAAGTCCCCAGGGGCCCCTGCTCAGA|AGCGTGTCACCAGTCTCTGCCGGGGCCTCGTCTGTGACTCCTGGAGGGGCCCAGCCCT	23	0.714677918921867	0.70298117370363	0.792522386722458	N	Y	3.28126993978269	3.38080938095063	3.28126993978269	129	0.931421929484696	0.862843858969392	N	0.931421929484696	N	N	895	0	PTOV1	RP11-174O3.1	-	+	19	3	50363990	120026799	utr3p	downstream	PTOV1	RP11-174O3.1	50354138	120025573	+	+	0.931421929484696	50363881	120026868	50363999	120026868	50363881	120026818	-	+	Y	-	-
BT-474 (SRR064438)	non-validated	1126	TTGTTGCCCATGTGTTGCTACCATGGTAATCCTGCTCAGTACGAGAGGAACCGCAGGTTCAGACATTTTGTGTATGTGCTTGGC|TAAGGAGCCAATGGGGCGAAGCTACCATCTGTGGGATTATGACTGAACGCCTTTAAGTCAGAATCCCACCCAGGCAGAC	13755	0.956824486579192	0.693381584488225	0.759024495688283	N	N	3.7297745213208	3.71873223294673	3.71873223294673	67	0.672892868169188	0	N	0.760960172892868	N	N	0	216	RP11-313F23.4	SEC14L1	+	+	12	17	34371788	75213179	upstream	intron	RP11-313F23.4	SEC14L1	34343972	75082798	-	+	0.672892868169188	34372609	75158389	34372683	75158389	34372609	75158311	-	+	Y	-	-
BT-474 (SRR064438)	duplicate	969	GGCTGAAGGCCACTTGTCCCTCTAAGAAGTTGGGGGACGCCGACCGCTCGGGGGTCACGTAACTAGTTAGCAT|GCCAGAGTCTCGTTCGTTATTGGAATTAGCCAGACAAATCACTCCAGCAACTAAGGCCATGCACCACCACCCGTGGAATCGAGAAAGAGCTATCAATCTGTCAATCCTGTCCGTGTCCAGGCTGGGTGAGTTTTCCCATGTTGAGTCAAATTAAGCTGCAGGCTCCACTCCTGGTGGTGCCCTTCTGTCAATT	5708	0.0809481810886409	0.726146414569374	0.855967566156444	N	Y	3.58064844605001	3.79040344379773	3.58064844605001	267	0.904468729157047	0	N	0.795290133907957	N	N	3	1	LINC00273	ANKRD30BL	+	+	16	2	33962503	133015542	upstream	intron	LINC00273	ANKRD30BL	33961052	132905164	-	-	0.904468729157047	33963896	133012386	33963968	133012578	33963896	133012386	-	-	Y	-	-
BT-474 (SRR064438)	non-validated	769	CCGGTAAGGGTTTTCACGAAGATCTGCATTTTGACCTGTTAGCGGATACCAGGATCCTGCCAATCACCAACCACGTCCACCCACAGGGACACAAACAAGC|TAACCCAATACCAAACGCCCCTTTTCGTCTGATCCGTCCTAATCACAGCAGTCTTACTTCTCCTATCTCTCCCAGTCCTAGCCGCTGGC	5	0.900924249236888	0.404541223019427	0.363039807857973	N	N	2.89885125461967	3.39640391403071	2.89885125461967	0	0	0	N	0.0276167947959788	N	N	6788	3	UBB	RP5-857K21.4	-	+	17	1	16287220	659930	utr5p	intron	UBB	RP5-857K21.4	16284112	536816	+	-	0	16284434	566980	16284498,16285250	567060	16284434,16285216	566980	-	-	Y	-	-
BT-474 (SRR064438)	non-validated	1090	CATGGTAATCCTGCTCAGTAGGAGAGGAACCCCAGGTTCAGACATTTGGTGTATGTCCTTGGCTGAGGAGCCAATGGGGTAAAGCTACCATATGTGGGATTATGACTGAACGACTCTAAGTCAGAATCCCGCCGAGG|CGGAACGATACGGCAGCCCCGCGGCGCCTCGGTTGGCCTCGGTCGGCCTCGGATGGCCTCGGTCGGCCTCGGTCGGCCTCGGTCGGCCTCGGTCGGCCTCGGATGGCCTCGGTCGGCCTCGGTCGGCCTCGGTCGGCCTCGGATGGCCTCGGTTGGCCTCGGTCGGCTCGGTTGGCCTCGGATGGCCTCGGATACCTCGGATAGCCGGTCCCCGCCGGCGGGCCGCCCCGCCCCGCGCTGGGACCAGGGTCCGGTGCG	5330	9.84807808505439e-14	0.259910265746044	0.562558542892055	N	N	3.74490504608447	3.54036883034868	3.54036883034868	104	0.301039593010396	0	N	0	N	N	6	0	AP001347.6	AC079949.1	-	-	21	12	15516789	127650672	intron	upstream	AP001347.6	AC079949.1	15399742	127650616	+	-	0.301039593010396	15457294	127650907	15457409	127650907	15457294	127650673	-	+	Y	-	-
BT-474 (SRR064438)	non-validated	1279	TGCGTTATGGTAGCGCTGCCATAGCGACTCGCTTGCAGAGGACCCTCCTCCGCTTCCCCCTCGACGGGGTGAGGGGGGGAGA|AGCGAGGGTTCCGCCGGCCACCGCGGTGGTGGCCGAGCGCGGCTCGTCGCCTACTGTGGCCGGCGCCTCCCCTTTCCGAGTAAGGGGA	80	0.616620570545294	0.430072317554982	0.656459118523712	N	Y	2.9527872449373	3.20033998601945	2.9527872449373	110	0.903009556411354	0	N	0.781771501925546	N	N	0	0	AC010970.1	RP3-410C9.1	+	-	Y	20	10034093	26189869	upstream	intron	AC010970.1	RP3-410C9.1	10033981	26167655	+	-	0.903009556411354	10033569	26189369	10033569	26189369	10033491	26189297	+	+	Y	-	-
BT-474 (SRR064438)	duplicate	1091	GCGTTGCTGCCATGGTAATCCTGCTCAGTAGGAGAGGAACCCCAGGTTCAGACATTTGGTGTATGTCC|TTGGCTGAGGAGCCAATGGGGCGAAGCTACCATCTGTGGGATTATGACTGAACGCCTCTTAAGTCAGAATCCCGCCCAGGCGGAACGATACGGCAGCCCCGCGGCGCCTCGGTTGGCCTCGG	8026	0.514406737957478	0.917766446436872	0.831111226977561	N	N	3.47911741325579	3.64297278570613	3.47911741325579	104	0.575762242069603	0	N	0.868340006159532	N	N	6	0	AP001347.6	AC079949.1	-	-	21	12	15516789	127650672	intron	upstream	AP001347.6	AC079949.1	15399742	127650616	+	-	0.575762242069603	15457373	127650987	15457438	127650987	15457373	127650866	-	+	Y	-	-
BT-474 (SRR064438)	non-validated	1011	GAGTGCCTTAGAGGTCTTGGGGCCGAAACGATCTCAACCTATTCTCAAACTTTAAA|TGGGTAAGAAGCCCGGCTTGCTGGCGTGTGGAGCCGGGTATGGAATGTGAGTGCCTAGTGGGCCGCTTCTGGTAAGCAGACCTGGCTCTGCGGGATGAACCGAATGCCGGATTAAGG	462	0.923728016869657	0.698388679679184	0.712826506639076	N	N	3.38958719069204	3.28040470388214	3.28040470388214	54	0.378591954022988	0	N	0.662664203612479	N	N	0	796	ATP4A	PHKB	-	-	19	16	36054560	47735434	upstream	intron	ATP4A	PHKB	36040945	47495034	-	+	0.378591954022988	36066739	47539103	36066739	47539219	36066689	47539103	+	-	Y	-	-
BT-474 (SRR064438)	non-validated	100	CATACTTTTTAATGAGAACTTTGAAGGCCGAAGTGGAGAAGGGTTCCATGTGAACAGC|AGTTGAACACGGGTCAGTCGGTCCTGAGAGATGGGCGAGCGCCGTTCCGAAGGGACAGGCAATGGCCTCCCTTGCCCTCAGCGGATCGAAAGGGAGTCGGGTTCAGATCCCCGAATCCGGAGTGGCGGAG	11512	0.651439886936617	0.880577219423113	0.484895125022884	N	N	3.55976477294109	3.57233464462502	3.55976477294109	0	0	0	N	0.674147053457398	N	N	0	0	MIR3144	PID1	+	-	6	2	120336403	230136001	downstream	intron	MIR3144	PID1	120336325	229715242	+	-	0.60554643313264	120583489	230045624	120583489	230045624	120583444	230045495	+	+	Y	-	-
BT-474 (SRR064438)	non-validated	912	CCGGATGCCAAAGGATCTGACAGTGTATCTAGCTTTGGAAAACACAGGGGTCTGCCCTGTGAGCTGCTCCAACACCTTGGCTGCTCGCGTCAGTCTGTCTCCACTCTCCCCAACACAGATGTTGAGACAGAGTTTGCGGATGCGAAGTTCCCGCATGGGGTTCT|CCTTTTCACCTTGATCCGCCATGATAGAGAACAGGAAGAGCTCAGGTTCTCTTAAAAG	21	0.819676402999306	0.884726811655023	0.981628473736116	N	Y	3.58320909912975	3.6272104187567	3.58320909912975	201	0.639554662130818	0.639554662130818	N	0.691046853254987	N	N	3867	0	RPL11	RP11-114H7.1	-	+	1	5	24022915	130326121	coding	intron	RPL11	RP11-114H7.1	24018269	130325590	+	+	0.639554662130818	24019118	130325611	24019249,24020328	130325611	24019118,24020297	130325571	-	+	Y	-	-
BT-474 (SRR064438)	non-validated	1237	TGATCTGTTGTTGCCATGGTAATCCTGCTCAGTACCAACCCGCAGGTTCAGACATTCGGTGTATGTGC|TTGGCTGAGGAGCCAATGGGGCGAAGCTACCATCTGTGGGATTATGACTGAACGCCTCTTAAGTCAGAATCCCGCCCAGGCGGAACGATACGGCAGCCCCGCGGCGCCTCGGTTGGCCTCGGTCGGCCTCGGA	12000	0.863616454297268	0.900834345416645	0.963941387132965	N	N	3.707857778442	3.64297278570613	3.64297278570613	122	0.590273733255678	0	N	0.736604542807222	N	N	8	0	PPEF2	AC079949.1	-	-	4	12	76823724	127650672	intron	upstream	PPEF2	AC079949.1	76781020	127650616	-	-	0.590273733255678	76807281	127650987	76807281	127650987	76807223	127650866	+	+	Y	-	-
BT-474 (SRR064439)	validated	1165	ATCCTCGATGGATGCTAGCAGGCCGTCCTCACCCAACCCAAAAAGGTCAGTGGTTGAGTGGCTTTTTTGACTATGGATCTTTCTCAGAGATTATGCAGCCCTGGGCACAGACTGTGGTGGTTGGTAGAGCCAGGCTAGGAGGAATACCTGTGGGAGTTGTTGCTGTAGAAACCCGAACAGTAGAACTAAGTATCCCAGCTGATCCAGCAAACCTGGATTCTGAAGCCAAG|CTCCAGCGATTCAAGCGCTCCCTCTCCCTCAAGACCATCCTCCGAAGTAAGAGCTTGGAGAACTTCTTCCTTCGCTCGGGCTCTGAGCTCAAGTGCCCCACCGAGGTGCTGCTGACGCCCCCAACCCCACTGCCCCCTCCCTCCCCACCACCCACAGCCTCGGACAGG…	30	1	0.849791651956908	0.697171609898334	N	N	3.54552998930151	3.26100876128973	3.26100876128973	0	0	0	N	0	Y	Y	7393	745	ACACA	STAC2	+	-	17	17	35766909	37382125	coding	coding	ACACA	STAC2	35441923	37366789	-	-	0	35479453	37374426	35479549,35482715,35486326	37374426	35479453,35482619,35486291	37374199	-	+	N	-	-
BT-474 (SRR064439)	validated	1155	GGCGGCCTCGAGCACCCTTCTCTTCTTGCCGCCGGGGACTTCAGATTGATCCTTCCCGGGAAGAGTAGGGACTGCTGGTGCCCTGCGTCCCGGGATCCCGAGCCAACTTGTTTCCTCCGTTAGTGGTGGGGAAGGGCTTATCCTTTTGTGGCGGATCTAGCTTCTCCTCGCCTTCAGGATGAAAGCTCAGGGGGAAACCGAGG|GTTTACCTTATGGGTGGGAGGAAGCTTACACAGCAGATGGAATCAAGTACTTCATCAATCATGTAACACAGACTACATCCTGGATCCATCCCGTGATGAGTGTCCTGAATCTATCTCGCTCAGAGGAGAATGAAGAGGATTGCTCTAGAGAA	9	1	0.318371648541663	0.669269229471145	N	N	3.39062026046193	3.5319270478477	3.39062026046193	0	0	0	N	0	N	Y	4776	216	MED1	STXBP4	+	-	17	17	37607539	53241646	coding	coding	MED1	STXBP4	37560538	53046088	-	+	0	37607291	53218671	37607493	53218728,53237251	37607291	53218671,53237158	-	-	N	-	-
BT-474 (SRR064439)	non-validated	2727	TTCGGTCTCCAAACCTAGTTCTAATGCACTAAGTGGCACTGACTGCTGAACTGACGGGGTAGGCATTGGAGTTGCAAGCCCTGCATCTCCACCATCAATATCAAAGAGGTCATTCGGACTAATTCCACTCTCACTCAAAGCAGCAAGCAGTAAATCTTGCCCTGGCTCCACCAT|TTTCCCCGCGGGACCCGGCGCCAGCACAGCTCCTCCCGGGAGGTGTGAGTTTGAAGGACCAGAGGCGACTGGAGCGGAGGCGGCGGTGGCGGCGGCAGCAGCGGCGTCCTGCTCTGCCTACCTCCCCGCCGCCATCTTGACGCCC	3	1	0.84049092786751	0.594826778135049	Y	Y	3.38809011260573	2.95960396827598	2.95960396827598	0	0.993125	0	Y	0.98625	N	N	481	0	SBNO1	RP13-942N8.1	-	-	12	12	123834988	123850660	coding	upstream	SBNO1	RP13-942N8.1	123773656	123849500	-	+	0	123834988	123849248	123832680,123834988	123849392	123832639,123834857	123849248	+	-	N	-	-
BT-474 (SRR064439)	validated	1543	CACCGCGTAGACCGACCCCCCCCCAGCGCGCCCACCCGGTAGAGGACCCCCGCCCGTGCCCCGACCGGTCCCCGCCTTTTTGTAAAACTTAAAGCGGGCGCAGCATTAACGCTTCCCGCCCCGGTGACCTCTCAGGGGTCTCCCCGCCAAAGGTGCTCCGCCGCTAAGGAACATGGCGAAGGTGGAGCAGGTCCTGAGCCTCGAGCCGCAGCACGAGCTCAAATTCCGA|GCAAGTGCGGAGGCAAGACACATCAAAGCAGAGATGGGAAGTGAAAGAGCTCTCGTACTGGACAGATTAGCAAGCAATGTGGCAAAACGAAAAAGCTCAATGCCTCAGAAATTCATTGGTGAGAAGCGCCACTGCTTTGATGTCAACTATAATTCAAGTTACATGTATG…	13	0.952407391159006	0.686482756653952	0.833784473084962	N	N	3.58271458558979	3.23527702852946	3.23527702852946	0	0	0	N	0	N	Y	2018	238	VAPB	IKZF3	+	-	20	17	57026157	38020441	coding	utr5p	VAPB	IKZF3	56964178	37921198	+	-	0	56964573	37934020	56964572	37922746,37934020,37934138	56964344	37922625,37933904,37934138	+	+	Y	-	-
BT-474 (SRR064439)	validated	3378	GCCTGGCCTCTCCCTTCTCAACTTAGGGCGGCGGCGGGCCCGCGCCCCTGGCTCCCGGGCCATGGCGCTGAGGGAGCTCAAAGTGTGTCTGCTCGGGGATACAGGTGTAGGTAAATCGAGTATTGTGTGGCGGTTTGTGGAAGACAGTTTTGATCCAAACATCAACCCAACAATAGGG|CTTTTGGAAATGCCAAGACAGCCCACAACAACAACTCCAGCCGGTTTGGGAAATTCATCCAAGTCAGCTACCTAGAGAGTGGCATCGTGAGAGGAGCTGTCGTCGAGAAATATCTGCTTGAAAAGTCTCGCCTGGTGTCTCAGGAGAAGGATGA	6	1	0.922955903678816	0.190446392623779	N	N	3.27192306858781	3.2793317813189	3.27192306858781	0	0	0	N	0.00947700947700958	N	Y	1025	835	RAB22A	MYO9B	+	-	20	19	56942563	17324103	coding	coding	RAB22A	MYO9B	56884752	17212466	+	+	0	56886178	17256207	56885068,56886178,56918774	17256301,17263513	56884972,56886099,56918774	17256208,17263454	+	-	Y	-	-
BT-474 (SRR064439)	validated	2067	TCTGTTCCTCGTGATGACCACCCCCTCCCGGGGGGACGTGCCACCAACAATGTAATAAACATCAGCAATAAGGGGAGTCTTGGCCAACTTGCCAACAGCTGCTTCGAAGTTTTCCGACTCACTCAGGGTAGCGCGGATCAGCCAGCTGACGGGAATGTGTCTCCGAAACAGGGCAGCGATAGCATTCTCCCACCACCAGCCTTTATCT|GAACGGGGCGGGTGAGCGCGCCGCCGCGGGCCGAGTCCACCGGGTCGCCAGGCCAGGCGCGAGCTCCTCCCGTGCGGGTCCGTCACAGCATCTCCCGGGAGACGTGGCCGCCACGGGCCGGGCTCACACCCCTCCGCCCGGCTGAAGCCGCTCCTCTGCGCTCCGGCCGCCGCCTGCGACCTCCCC	8	1	0.716244879525436	0.377250579576429	N	N	3.34615493251855	3.07354122878139	3.07354122878139	0	0	0	N	0	N	Y	338	889	NAAA	AHCTF1	-	+	4	1	76862204	247095280	coding	utr5p	NAAA	AHCTF1	76831809	247002400	-	-	0	76846964	247094880	76842276,76846966	247095067	76842148,76846888	247094882	+	-	Y	-	-
BT-474 (SRR064439)	validated	1174	CCGGTGATGGCGGCAGCGGCTGTGGTGGCTGCGGCGGGTCCGGGCCCATGAGGCGACGAAGGAGGCGGGACGGCTTTTACCCAGCCCCGGACTTCCGAGACAGGGAAGCTGAGGACATGGCAGGAGTGTTTGACATAGACCTGGACCAGCCAGAGGACGCGGGCTCTGAGGATGAGCTGGAGGAGGG|GGCCAAGTATAAGGAGCGAGGGACGGTCTTGGCTGAGGACCAGCTAGCCCAGATGTCAAAGCAGTTGGACATGTTCAAGACCAACCTGGAGGAATTTGCCAGCAAACACAAGCAGGAGATCCGGAAGAATCCTGAGTTCCGTGTGCAGTTCCAGGACATGTGTGCAACCATTGGCGTGGATCCGCTGGCCTCAGG	26	1	0.872733203473992	0.280770401515161	N	N	3.10865033796007	3.67593181695901	3.10865033796007	0	0	0	N	0	N	Y	517	2145	RPS6KB1	SNF8	+	-	17	17	58027925	47022479	coding	coding	RPS6KB1	SNF8	57970447	47006678	+	-	0	57970686	47021337	57970685	47014653,47018424,47021337,47022043	57970499	47014650,47018286,47021287,47022043	+	+	N	-	-
BT-474 (SRR064439)	validated	1167	GCCCATCGCAGCACCAATGCCCAGGGCAGCCATTGGAAACAGAGGCGGAAATTCCTGCCCGATGACATTGGCCAGTCACCCATTGTCTCCATGCCGGACGGAGACAAGGTGGACCTGGAAGCCTTCAGCGAGTTTACCAAGATCATCACCCCGGCCATCACCCGTGTGGTGGACTTTGCCAAAAAACTGCCCATGTTCTCCG|AGCAATTTCGAGTGCAAGTGCCACAGTGTCAGCTAAAGAAACACAACTGCGGGTTTTCTGCAGAGCAAAATGGTTCTGAAATGTCACTGAATAGCTCACAAAGGACGCCAATCTACGACAACAGAGACATAAGCATATAGGAGAAAGGGTCCACACATCCTCCTTTCAAA	43	0.912698207509679	0.683087204541903	0.826545457952254	N	N	3.41576000382978	3.47911741325579	3.41576000382978	0	0	0	Y	0	N	N	952	0	THRA	AC090627.1	+	-	17	17	38250120	46386124	coding	intron	THRA	AC090627.1	38214543	46371707	+	+	0	38243104	46371707	38241068,38243104	46371876	38241012,38242960	46371707	+	-	N	-	-
BT-474 (SRR064439)	non-validated	3093	TCCGAGCCACCCTCGGCCAGTGCATCCACCGCCAGGCGGTAGTACTCTTTGTAGTGAGGCGGCAGGTACCCGGGTGCCAGTGGGTTGTCCCCCTGCGAGGAGCTCTGAGAGCGACGGGCCATGTTGGGGCCAGGGGCCT|GGCCTTGGGTCTGCAGTGCTTCGAAGCCCTCACTCCGGAGCTGCTCCAGGGCCACGGCCAGCTGCAGCCCCTCCACGTGTACCCAGGCCTGCTCCTCCTGTAGCTGCTGCAGCCACAGCTGCTCCTCCTGTAGCTGCTGCAGCCATAGCTGCTCCTC	6	1	0.628698255946609	0.563291080199111	Y	Y	3.40488554932505	3.56232542602083	3.40488554932505	0	0	0	Y	0	N	N	1873	0	FAM83H	RP11-429J17.6	-	-	8	8	144815971	144828507	utr5p	intron	FAM83H	RP11-429J17.6	144806103	144816310	-	+	0	144815862	144819819	144812767,144815862	144819975	144812631,144815861	144819819	+	-	N	-	-
BT-474 (SRR064439)	non-validated	1016	GCGCACTTCCCTGAGGACACTGTGGAGCAGAAGGCAGAAAGCGTGGGCAGAATTATGCCTCACACGGAGGTGAGCCCCTGACCAAGACTCCAAAGTCCCACCTCCCGTCACCCAGCTGGGGTGCACCCAGCTGGGACATCGGTTGCTTTCAGTGAGAGAGTCAAATGGCTCAC|CCAGGGCTCTCCCCAGATACCATTTCAAATTCCTGTTAATTTTATTTTAATCCTGAATTCTGAGTTTGAATGTATACCCAGATCAGCCCTGTCTTTGTTTTCACTCACTGGTGTGGATGTAGCATGCCTCCATTAAGCTTTTTATTAACTTGCCTTGTTTTTGTCTCTGGCCTCGTTACCT	2	1	0.652432265266391	0.739428201137693	N	N	3.57167229721571	3.4325554405491	3.4325554405491	0	0	0	Y	0	N	N	1172	0	ACSF2	C17orf112	+	-	17	17	48552206	51065012	intron	downstream	ACSF2	C17orf112	48503519	51062880	+	+	0	48548600	51089613	48548600	51089793	48548428	51089613	+	-	N	-	-
BT-474 (SRR064439)	validated	1069	CCGCTGGTGGAGCCTGAGCTGTTACTCAGAGTCTCGATGCTTCCCTCTCGCTGAAGTTCTT|TTATTTATAGGTTTTTCATCTTTTTCATAAGGCTTTACAAACCACTTGCCAATACGTACAAAATTCCTGTTCATTAAACACCGTTCCAATAGATTGTGAACTGCTTTGAAAAGCAGAGTACGGCATTCATAGGAAAGTCCATTCTC	2	0.046809260856825	0.558211528218307	0.572722230766208	N	N	3.48801385650339	3.01659931510993	3.01659931510993	0	0.0211223203026483	0	N	0.00480769230769251	N	Y	352	499	BCAS3	MED13	-	+	17	17	59470199	60142643	coding	coding	BCAS3	MED13	58754814	60019966	+	-	0.0211223203026483	59469338	60129898	59466069,59469395	60130046	59466067,59469338	60129901	-	-	N	-	-
BT-474 (SRR064439)	non-validated	2548	CCACTGCTGCATTATTATTAGCCCGTCTCCTGTAAGGGCTGCTAGCCCAGAACACGCTCCGAGGATTCCCGGCTGGAGGTGGCCCAGCCATGCCAGACGGGACCGTCTGGGGCGGTGGCTGCATGACTGAACCCTTGCACAAGTCGATGCTGCTTACAGAAGGAAGCAGGATATAGCTGTTCCTTAATTGGAGCTG|CACACCTGCCTGGCAAGGGCAGGGAAGAGCCGCGGCCTTCCTCTGCTGCTCCTTCCAGAGGGCAGGCGCCGTGGTGGGGGTGCCCGCCCGATGGCATCGCGGGAGGCTGAGCTCCCAGCAGCGGCTGAGGTCCTCCCTGGGTGGGAGCCACCCTTGTCCCCAGCTGGGCCGGCGGC	3	1	1	0.280012845380143	Y	Y	3.65594388497418	3.41782614336956	3.41782614336956	0	0	0	Y	0	N	N	3254	17	SEC16A	C9orf163	-	-	9	9	139372141	139380518	utr5p	coding	SEC16A	C9orf163	139334549	139377947	-	+	0	139372139	139378921	139372139	139379096	139371944	139378921	+	-	N	-	-
BT-474 (SRR064439)	validated	1108	GGCGCACTACGGGGACGCTGGGCCGGGCACCGGGCTGTGTGGAGAAGTGAGCGCGCTCGTCTGACCCCCGTGCCCGCCACCCCGAGCCACTAACGGCGATCTCCCAAGGCCTGCCCGAGGCCTCTGTCCTCTGTCCTCAGCCCCGCAGCGGCAACGTCTTGCACTCGGCGAGCTCGCCGCTCCCGACCCTCCCGCGCCCCCGCCCTGCCGCGCTGCTCCCCGCCCAGCCGCGGGTCTGTGGTCCAAGCCGCCCCGAAGCAGCCC|CCAGATGAAAACTCGCTGGATTTTTCCTCCTGTATGTTACGGCCTGGGATTAAAAATGCTCAGGAGCTTGCCTGTGGAGTGTGCCTCTTGAATGTGGACTCGAGGAGCCGGAAAGAAGAGAAGCCTGCAGAAGA…	31	0.497401033885065	0.280407518622774	0.306794338497334	N	N	3.22423474015539	3.65384724021086	3.22423474015539	0	0	0	Y	0	N	Y	1140	1746	TOB1	SYNRG	+	-	17	17	48945339	35969544	utr5p	coding	TOB1	SYNRG	48939584	35874900	-	-	0	48943419	35880751	48943682	35879174,35880317,35880751	48943419	35879056,35880282,35880641	-	+	N	-	-
BT-474 (SRR064439)	non-validated	862	GGGACGACGCTCCCCGAGCCGTGTTTCCTTCCATCGTCGGGCGCCCCAGACACCAGGGCGTCATGGTGGGCATGGGCCAGAAGGACTCCTACGTGGGCGACGAGGCCCAGAGCAAGCGTGGCATCCTGACCCTGAAGTACCCCATTGAGCAT|GGCATCCTCACCCTGAAGTACCCCATCGAGCACGGCATCGTCACCAACTGGGACGACATGGAGAAAATCTGGCACCACACCTTCTACAATGAGCTGCGTGTGGCTCCCGAGGAGCACCCCGTGCTGCTGACCGAGGCCCCCCTGAACCCCAAGGCCAACCGCGAGAAGATGACCCAGATCATGTTTGAGACCTTCAACACCCCAGCCATGTACGTTGCTATCCAGGCTGTGCTATCCCTGTACGC	8	0.760996457629653	0.396370474525398	0.809372526589848	N	N	3.7061623612628	3.61360747730288	3.61360747730288	0	0.665316715154721	0.671879132504628	N	0.671879132504628	N	Y	17479	24721	ACTG1	ACTB	+	-	17	7	79490873	5603415	coding	coding	ACTG1	ACTB	79476997	5566782	-	-	0.665316715154721	79479258	5569031	79479168,79479313	5568350,5568968	79479073,79479258	5568283,5568792	-	+	Y	-	-
BT-474 (SRR064439)	validated	3090	AAAGAAAGTGAATAAATCAGGAATATAAGTGGGCGGGGGGCCCCTGAGAGGGGGGTCGCAAAGGGTGAGACATGGCCACCAGGCGTTTAACCGACGCTTTCTTGTTGTTGCGGAATAATTCCATCCAAAACCGGCAGCTGTTAGCCGAGCAAGTG|CTGGAAGCGAGGTTCAAAATGAGCCTGTTTGGAACAACCTCAGGTTTTGGAACCAGTGGGACCAGCATGTTTGGCAGTGCAACTACAGACAATCACAATCCCATGAAGGATATTGAAGTAACATCATCTCCTGATGATAGCATTGGTTGTCTGTCTTTTAGCCCACCAACCTTGCCGGGGAACTTTCTTATTGCAGGATCATGGGCTAATGATGTTCGCTGCTGGGAAGTTCAAGACAGTGGA…	2	0.339053955941571	0.857032005619422	0.940398640548061	N	N	3.76526370042988	3.63296356710195	3.63296356710195	0	0	0	N	0	Y	N	1788	2249	STX16	RAE1	+	-	20	20	57254582	55954267	coding	utr5p	STX16	RAE1	57226328	55926066	+	+	0	57227146	55926616	57227146	55926626,55929184,55929872,55931553	57226992	55926616,55929088,55929768,55931502	+	-	N	-	-
BT-474 (SRR064439)	non-validated	2249	GGCATCCTGCCGGCTCTCACTCCTCCAGACACCATTCACGGTTTTGGTTGGAGCGATGGTCACCACGGGGGGGGTGCTGGGCACGCTGTGGCCCCCAGGGGGGACGATGATAGGGCCCATGGGCACGCGCTTGGGTGTGCTGGCGGGGGAGCTGTGGTTGGTGGCCGGAGAGGACACGGGGGACGACTCGCTGCTCAGTGAGGACCCT|GGTAAGTAATACAGAGGCGGCTTCAATCCAAACATGGTTCAAATTAGAATTCCATAGTGGCCAGAGAGGGATGAAGAAGGAAAATAATATTAAAACCCAGGAATGAACAAAAAGCACCGTTCAAGCCACGGCGCTCAAAAATGTCCAAAACAATAAAATAAAGGCAGAAGAGCGATCCCGAGAGCGACGA…	2	1	0.279732062325266	0.391671375503925	Y	Y	3.24103017687471	3.77104735399867	3.24103017687471	0	0.965430849654309	0	Y	0.985184649851847	N	N	1814	0	KIAA0182	CTD-2542L18.1	-	+	16	16	85709810	85629326	coding	upstream	KIAA0182	CTD-2542L18.1	85645015	85625872	+	+	0	85667737	85589967	85667738,85682357,85687889	85589967	85667737,85682158,85687884	85589766	-	+	N	-	-
BT-474 (SRR064439)	non-validated	2468	CCCATAATCATACAAAGCCCCCGCACCAATAGGATCCTCCCGAATCAACCCTGACCCCTCTCCTTCATAAATTATTCAGCTTCCTACACTATTAAAGTTTACCACAACCACCACCCCATCATACTCTTTCACCCACAGCACCAATCCTACCTCCATCGCTAACCCCACTAAA|ACACTCATTCTCAACCCCCTGACAAAACACATAGCCTACCCCTTCCTTGTACTATCCCTATGAGGCATAATTATAACAAGCTCCATCTGCCTACGACAAACAGACCTAAAATCGCTCATTGCATACTCTTCAATCAGCCACATAGCCCTCGTAGTAACAGCCATTCT	5	0.876604578951255	0.68573027267124	0.777092412656274	N	N	3.1416492220063	3.22060116451241	3.1416492220063	18	0.00891158858753072	0.020852412821416	N	0.00891158858753072	Y	N	12014	86821	MT-ND6	MT-ND4	-	-	MT	MT	14673	12137	coding	coding	MT-ND6	MT-ND4	14149	10760	-	+	0.00891158858753072	14398	11498	14398	11664	14227	11498	+	-	N	-	-
BT-474 (SRR064439)	non-validated	2506	AAAAATTTCCACCAAACCCCCCCTCCCCCGCTTCTGGCCACAGCACTTAAACACATCTCTGCCAAACCCCAAAAACAAAGAACCCTAACACCAGCCTAACCAGATTTCAA|ATTTTATATCTTCTTCGAAACCACACTTATCCCCACCTTGGCTATCATCACCCGATGAGGCAACCAGCCAGAACGCCTGAACGCAGGCACATACTTCCTATTCTACACCCTAGTAGGCTCCCTTCCCCTACTCATCGCACTAATTTACACTCACAACACCCTAGGCTCACTAAACATTCTACTACTCACTCTCACTGCCCAA	20	1	0.408158828296435	0.665042555175225	N	Y	3.027641603484	3.21166486847146	3.027641603484	0	0	0	Y	0.00319488817891367	N	N	0	86821	J01415.2	MT-ND4	+	-	MT	MT	647	12137	upstream	coding	J01415.2	MT-ND4	577	10760	+	+	0	396	11110	396	11311	287	11110	+	-	N	-	-
BT-474 (SRR064439)	duplicate	1168	CCAGTCACCCATTGTCTCCATGCCGGACGGAGACAAGGTGGACCTGGAAGCCTTCAGCGAGTTTACCAAGATCATCACCCCGGCCATCACCCGTGTGGTGGACTTTGCCAAAAAACTGCCCATGTTCTCC|GAGTGTGGAGAAAAGAGAGAGAAAGGGAGAGAAGAGTCATGGACCCTACTTTATGGTTGCCATGGATGCAAGGTCAGCCTTCCACACTTGGATCTACCAGCAGAGTTCAGACAGGTCAACGTGTGACCGGCTCAGGCCCTGGGGTTAAAAGTTCAAGCAGCTATGGAAAAACCAATATGTCCACGCAGAGTATG	15	0.692495991079849	0.931153551929847	0.85688852388191	N	N	3.38383404234679	2.49774607094505	2.49774607094505	0	0	0	Y	0	N	N	952	0	THRA	AC090627.1	+	-	17	17	38250120	46386124	coding	intron	THRA	AC090627.1	38214543	46371707	+	+	0	38243103	46384690	38243103	46384883	38242974	46384690	+	-	N	-	-
BT-474 (SRR064439)	duplicate	866	GCGTGATGGTGGGCATGGGTCAGAAGGATTCCTATGTGGGCGACGAGGCCCAGAGCAAGAGAGGCATCCTCACCCTGAAGTACCCCATCGAGCACGGCATCGTCACCAACTGGGACGACATGGAGAAAATC|TGGCATCCTGACCCTGAAGTACCCCATTGAGCATGGCATCGTCACCAACTGGGACGACATGGAGAAGATCTGGCACCACACCTTCTACAACGAGCTGCGCGTGGCCCCGGAGGAGCACCCAGTGCTGCTGACCGAGGCCCCCCTGAACCCCAAGGCCAACAGAGAGAAGATGACTCAGATTATGTTTGAGACCTTCAACACCCCGGCCATGTACGTGGCCATCCAGGCCGTGCTGTCCCTCTACGCCTCTGGGCGCACCACTGGCAT…	3	0.334497126397261	0.737291232867092	0.929778903328372	N	N	3.5016965035439	3.60103760561896	3.5016965035439	4	0.268765213359607	0.40587173585468	N	0.40587173585468	N	Y	24721	17479	ACTB	ACTG1	+	-	7	17	5603415	79490873	coding	coding	ACTB	ACTG1	5566782	79476997	-	-	0.268765213359607	5568792	79478652	5569030	79478652,79479106	5568900	79478502,79478929	-	+	Y	-	-
BT-474 (SRR064439)	non-validated	2491	TCCAAACAACAATCCCCCTCTACCTAAAACTCACAGCCCTCGCTGTCACTTTCCTAGGACTTCTAACAGCCCTAGACCTCAACTACCTAACCAACAAACTTAAAATAAAATCCCCACTATGCACATTTTATTTCTCCAACATACTCGGATTCTACCCTAGCATCA|CACACCTACACCCCTTATCCCCATACTAGTTATTATCGAAACCATCAGCCTACTCATTCAACCAATAGCCCTGGCCGTACGCCTAACCGCTAACATTACTGCAGGCCACCTACTCATGCACCTAATTGGAAGCGCCACCCTAGCAATATCAACCATTAAC	5	0.806070946775332	0.928346267022199	0.803674751780661	N	N	3.38230645903694	3.31592438821476	3.31592438821476	6	0.0279907975460123	0.0279907975460123	N	0.0279907975460123	Y	N	35261	58849	MT-ND5	MT-ATP6	+	-	MT	MT	14148	9207	coding	coding	MT-ND5	MT-ATP6	12337	8527	+	+	0.0279907975460123	13933	8922	13933	9081	13769	8922	+	-	N	-	-
BT-474 (SRR064439)	non-validated	1725	TGACCTTTTGGGTTTTAAGCAGGAGGTGTCAGAAAAGTTACCACAGGGATAACTGGCTTGTGGCGGCCAAGCGTTCATAGCGACGTCGCTTTTTGATCCTTCGATGTCGGCTCTTCCTATCATTGTGAAGCAGAATTCACCAAGCGTTGGATTGTTCACCCACTAATAGGGAACGTGAGCTGGAG|TTTAGACCATCATGAGACAGGTTAGCTTTACCCTACTGTTGATGTGTTGTTGCCATGGTAATCCTGCTCAGTATAAAAGGAACCACAGTTTCAGACATTTGTTGTATGTGCTTGGCTGAGGAGCCAATGGGGTGAAGTT	702	1	0.306668851821671	0.731686825795281	N	N	3.73808832274579	3.48743121468078	3.48743121468078	0	0.48360819037078	0	N	0.88524626452684	N	N	0	0	HFM1	AC093388.3	+	+	1	2	91870426	191432828	intron	intron	HFM1	AC093388.3	91726323	191399581	-	+	0.48360819037078	91852781	191402786	91852965	191402786	91852781	191402648	-	+	Y	-	-
BT-474 (SRR064439)	non-validated	2464	TCCTATTCCCCCGAGCAATCTCAATTACAATATATACACCAACAAACAATGTTCAACCAGTAACTACTACTAATCAACGCCCATAATCATACAAAGCCCCCGCACCAATAGGATCCTCCCGAATCAACCCTGACCCCTCTCCTTCATAAATTATTCAGCTTCCTACACTATTAAAGTTTACCACAACCACCACCCCATCATACTCTTTCACCCACAGCAC|ACCCAACTAAAAATATTAAACACAAACTACCACCTACCTCCCTCACCAAAGCCCATAAAAATAAAAAATTATAACAAACCCTGAGAACCAAAATGAACGAAAATCTGTTCGCTTCATTCATTGCCCCCAC	17	1	0.204033271027366	0.585411889958473	N	N	2.78950093394043	2.73036908954982	2.73036908954982	0	0	0	N	0	Y	N	12014	2274	MT-ND6	J01415.25	-	-	MT	MT	14673	8572	coding	coding	MT-ND6	J01415.25	14149	8366	-	+	0	14367	8435	14367	8564	14149	8435	+	-	N	-	-
BT-474 (SRR064439)	non-validated	1871	CAAGTTCTAAACACATAACATCCCAGAAGAAAAGAGGAGACACATCCCCTGAACCCAGACACATTCACCTGAGAACCAGCCATTTCTTCCTCTTCTTCCTTCTTCTCTGGGATTCCTTCTCAGGTGAGATTATCTGGACAAATCACA|CCATTTCCCAGCTTCCCGGGTGTCCAGGCTGCTTAGCTATGGATCTCCTGATACCTGCAGGTCAGAGGGCAAGAGGCTGTGGCGGCCACCTGAGCTTCCCCGAGCAAAGCACGCCGAGCACAGAAGACGACCCAGCTGAGGCTGGCAGGA	3	0.872654749912544	0.66278050045228	0.804294891608915	Y	Y	3.51104337473878	3.38383404234679	3.38383404234679	6	0.99322010683468	0	Y	0.871182029858923	N	N	0	1	RP11-488L18.4	RP11-488L18.8	-	+	1	1	247372795	247405125	intron	downstream	RP11-488L18.4	RP11-488L18.8	247353153	247373993	-	-	0	247365396	247373992	247365396	247374141	247365250	247373992	+	-	N	-	-
BT-474 (SRR064439)	non-validated	3246	GACAATGGCTTCGCCGGCTGCGTGCACTTTTCCTACAAAGCATCGTGTGAGATCCGCGTGCTTATGCTCCTGTACTCTTCAGAGAAGAAAATCTTCATTGGCCTCATCCCCCATGACCAGGGCAACTTTGTCAACGGCATCCGGCGTGTCATTGCCAACCAGCAGCAGGTCCTGCAGCGGAACCTGGAGCAGGAGCAACAGCAACGAGGGATGGGGGGGTAGTGGTTACCCCGGGCTGGGCCCCTCCAGGAGTCACAGATGAGGCCCCCGCAGAGACTGGTG|ACACGCTTCTGAGCAGGGGCCCCTGGGGACTTCGATTGCCCAGCAAC	22	1	0.94211454167685	0.555031354701671	N	Y	3.40847927217468	3.44871903508266	3.40847927217468	330	0.936363636363637	0.936363636363637	N	0.936363636363637	N	N	609	0	PTOV1	RP11-174O3.1	+	-	19	3	50363990	120026799	utr3p	downstream	PTOV1	RP11-174O3.1	50354138	120025573	+	+	0.936363636363637	50363596	120026862	50361910,50363440,50363596	120026902	50361899,50363243,50363525	120026862	+	-	Y	-	-
BT-474 (SRR064439)	non-validated	2230	ACACGCTGAGCCAGTCAGTGTAGCGCGCGTGCAGTCCCGGACATCTAAGGGCATCACAGATCTGTTATTGCTCAATTTCGGGTGGCTGAAGGCCACTTGTCCCTCTAAGAAGTTGGGGGACGCCGACCGCTCGGGGGTCACGTAACTAGTTA|GCATGCCAGAGTCTCGTTCGTTATTGGAATTAGCCAGACAAATCACTCCAGCAACTAAGGCCATGCACCACCACCCGTGGAATCGAGAAAGAGCTATCAATCTGTCAATCCTGTCCGTGTCCAGGCTGGGTGAGTTTTCCCATGTTGAGTCAAATTAAGCTGCAGGCTCCACTCCTGGTGGTGCCCTTCTGTCAATTCCTTTAAGTTTCAGCTTTGCAACCATACTCCCCTCGGAACCCAA	3081	0.566945879182523	0.727522612758862	0.708736009041869	N	Y	3.48383749183115	3.8552884365336	3.48383749183115	394	0.914690756078012	0	N	0.875317258883249	N	N	2	0	LINC00273	ANKRD30BL	+	+	16	2	33962503	133015542	upstream	intron	LINC00273	ANKRD30BL	33961052	132905164	-	-	0.914690756078012	33963900	133012382	33964051	133012622	33963900	133012382	-	-	Y	-	-
BT-474 (SRR064439)	non-validated	1430	GCAGCTCCGGGTGACACGAGGGGACTGAAGATACTCCCACAGGGGCTCAGCAGGAGCAATGGGTAACCAAATGAGTGTTCCCCAAAGAGTTGAAGACCAAGAGAATGAACCAGAAGCAGAGACTTACCAGGACAACGCGTCTGCTCTGAACGGGGTTCCAGTGGTGGTGTCGACCCACACAGTTCAGCACTTAGAGGAA|GGATCATGGCCATTTCACAGACAACTACCCAAAAACATCTACAGACGACATTACTCCTACAGTCAATCTGAGACCAGAAAACTCTCTGTCCTCCCATCAGCAGGAAGTAGCTAGAAAGAACATGCCACCTCTCTTCCTTTTTATAACTATAGGGTCTGGATTGACAGAGCAGGAGCATCACCATCTTGGACAAGC	2	1	0.928224692843238	0.0408034297738916	N	N	3.58337693299909	3.28764558274389	3.28764558274389	0	0	0	N	0	N	N	718	252	BCAS1	B4GALNT2	+	+	20	17	52687304	47247351	coding	upstream	BCAS1	B4GALNT2	52553316	47209822	-	+	0	52674625	47199825	52674693,52675262,52687024	47199825	52674625,52675186,52686972	47199631	-	+	Y	-	-
BT-474 (SRR064439)	non-validated	2366	TCATCACTTGTAAAGCCTGAGACAGCTGCCTGTGTGGGACTGAGATGCAGGATTTCTTCACACCTCTCCTTTGTGACTTCAAGAGCCTCTGGCATCTCTTTCTGCAAAGGCACCTGAATGTGTCTGCGTTCCTGTTAGCATAATGTGAGGAGGTGGAGAGACAGCCCACCCCCGTGTCCACCGTGACCCCTGTCCCCACACTGACCTGTGTTCCCTCCCCGATCATCTTTCCTGTTCCAGAGAGGTGGGGCTGGATGTCTCCATCTCTGTCTCAA|CTTTACGTGCACTGAGCTGCAACTTCTTACTTCCCTACTGAAAATAAGAATCTGAATATAAATTTGTTTTCTCAAATATTT	6	1	0.742291498591136	0.944440803857974	N	Y	3.3478104969044	3.3446273492087	3.3446273492087	357	0.864577929937407	0.864577929937407	N	0.926133416329495	Y	N	1863	101	HLA-C	HLA-B	+	-	6	6	31239907	31324965	utr3p	utr3p	HLA-C	HLA-B	31236526	31321649	-	-	0.864577929937407	31236691	31321812	31236950,31237129	31321812	31236691,31237115	31321732	-	+	N	-	-
BT-474 (SRR064439)	non-validated	467	CACCATTGACCGGCACCCCTGAGGCGCTTAGCTGCCGTGAGTCCCCATGGTACACTGGCCCTGAGTCCATCTGACCTGGAACAGGTCCATCAACTGGGCTGAGCTCTGAGCCTGTCTTGACAGCCGCTCCTTGTCCCCACGGCCCGGCTCCTTCACCAGCCTTTATTTCC|ACCTCCTTGAGAAGCCCTACTTTTTTCTTCAGCACCTCACATTTTCGCAGTTTGCAGATCTGGTGCGTGCGGCGGTTGGTACAGCTAGTGCAAGCGCCACAGTTTTCCAGCCGCCGGCAGGGCTCACAAGTACCACACCGTTTCCGTTTCTTTCGACCATCTCCACCCCCTCGGAGTTGGGACTCACTCCCAGCCATGGAGAGCC	3	0.725914225764249	1	0.742595581430318	Y	Y	3.30956232562269	3.22167408707565	3.22167408707565	5	0.994133291614518	0	Y	0	N	N	258	0	TET3	RP11-711M9.1	-	+	2	2	74329698	74220867	coding	intron	TET3	RP11-711M9.1	74229840	74213653	+	+	0	74230239	74213835	74230293,74273519	74213835	74230239,74273405	74213631	-	+	N	-	-
KPL-4 (SRR064287)	non-validated	16	GTTAAGAATTGAAATACTGAATAAAAAAGGGGAAGCAATGCAAAAGCTTCCAGGAACAAGCCATGGAGGGTCAAAGAAACTCCTGGTTGAGCTCAAAGTTATTTTACATT|ACCAAATTCCAGACTCTGCTATGACATAAAAACCCCGAGGAAAACCAGAATAAGTGAATCGAGAAAAAAAAAATGATGGACAGAATGCCTAGAATTGTCGACAAC	12	0.742971981866476	0.501660771219794	0.386792189295576	N	N	3.52833332499807	3.51832410639388	3.51832410639388	0	0	0	N	0	N	N	578	0	SMCHD1	NDUFB11P1	+	-	18	11	2805015	92069662	coding	downstream	SMCHD1	NDUFB11P1	2655737	92069038	+	-	0	2707918	91996466	2707918	91996466	2707809	91996362	+	+	Y	-	-
[truncated: 6,005 more rows]
[truncated: 23 more columns]

## Sheet: S4C FusionCatcher
Supplemental Table S4C: Raw output of FusionCatcher on all benchmark datasets and validation results.
[truncated: 4,395 more rows]

## Sheet: S4D InFusion
Supplemental Table S4D: Raw output of InFusion on all benchmark datasets and validation results.
[truncated: 8,483 more rows]

## Sheet: S4E PRADA
Supplemental Table S4E: Raw output of PRADA on all benchmark datasets and validation results.
[truncated: 519 more rows]

## Sheet: S4F SOAPfuse
Supplemental Table S4F: Raw output of SOAPfuse on all benchmark datasets and validation results.
[truncated: 3,752 more rows]

## Sheet: S4G STAR-Fusion
Supplemental Table S4G: Raw output of STAR-Fusion on all benchmark datasets and validation results. The columns JunctionReads and SpanningFrags were emptied due to excessive size.
[truncated: 2,023 more rows]
