# Supplementary material for: Accurate and efficient detection of gene fusions from RNA sequencing data
Source: Genome Res. 2021 Mar;31(3):448–60. doi: 10.1101/gr.257246.119 (PMC7919457; doi:10.1101/gr.257246.119)
Supplement: Supplemental Material [file supp_gr.257246.119_Supplemental_Table_S5.xlsx]

## Sheet: S5 Fusions in pancreatic cancer
Supplemental Table S5: Collection of pancreatic cancer samples screened for oncogenic driver fusions. KRAS variants marked with a question mark (?) only fulfilled one of the criteria of high-quality variant calls, i.e., at least 10 % allele fraction and two or more supporting reads with high-quality non-reference bases. wt=wild-type, PDX=patient-derived xenograft, PDCM=patient-derived cell model,…
Source	Donor	Accession number(s)	Specimen	Library	WGS	KRAS status	Putative driver fusion	Arriba	deFuse	FusionCatcher	InFusion	PRADA	SOAPfuse	STAR-Fusion
CCLE-PAAD	AsPC-1	da249431-4151-468e-91af-070f3ac5cb56	cell line	paired-end	no	G12D	-
	BxPC-3	28a9fcec-6f21-4c28-b67e-e84bb8b677ec	cell line	paired-end	no	wt	-
	Capan-1	2d12b6ee-0f07-468f-9439-d5d285aeef3d	cell line	paired-end	no	G12V	-
	Capan-2	77a7bc07-60b5-4eab-948a-ce7eef317db3	cell line	paired-end	no	G12V	-
	CFPAC-1	9fc5da43-4f04-4bdc-a5bb-59a1ec219926	cell line	paired-end	no	G12V	FGFR2-COL14A1	found	missed	found	missed	missed	found	missed
	DAN-G	879c59fe-d3a7-419e-bdf3-1ebe5adb8320	cell line	paired-end	no	G12V	-
	HPAC	59b5010b-df6b-4d72-9538-350c4cd6062a	cell line	paired-end	no	G12D	FGFR2-COL14A1	found	missed	missed	missed	missed	missed	missed
	HPAF-II	87c41362-be6c-4d5a-b8a1-e5dbd7bf9493	cell line	paired-end	no	G12D	-
	Hs766T	c910c1e7-b21f-4eed-887f-a52bab5f073b	cell line	paired-end	no	Q61H	-
	HUP-T3	7c982878-9c7a-4964-aa27-46657b7baa83	cell line	paired-end	no	G12R	-
	HUP-T4	6e9d00b4-a012-40b6-b342-4dcdfe389c0b	cell line	paired-end	no	G12V	-
	KP-2	b496b51a-973d-47ef-be8c-18f91ee82b9f	cell line	paired-end	no	G12R	-
	KP-3	049f0d6d-14bf-42ac-af26-65acf7f5f0e4	cell line	paired-end	no	G12V	-
	KP-4	03bf73e6-b844-449c-82ae-7417f519f4d2	cell line	paired-end	no	G12D, M188V	-
	L3.3	d488d017-3f18-4756-ab47-331edc534526	cell line	paired-end	no	G12D	-
	Mia-PaCa-2	71ee227e-1d1f-4839-9c80-b3b60c9e632d	cell line	paired-end	no	G12C	-
	Panc02.03	9d1499ba-1000-42e4-8d90-2fd373a95309	cell line	paired-end	no	G12D	-
	Panc02.13	19445cb9-a33d-466a-ae80-14c3d4485878	cell line	paired-end	no	Q61R	-
	Panc03.27	ec089ef2-7109-40fd-8620-8badd76b292f	cell line	paired-end	no	G12V	-
	Panc04.03	5e3752d6-deb7-4f2a-ae9f-13e62b8099f8	cell line	paired-end	no	G12D	-
	Panc05.04	cd3f7e33-1813-44a5-b43f-0f358e7f2bd0	cell line	paired-end	no	G12D	-
	Panc08.13	2dd9e22b-77cb-42d4-830d-e19a854e3083	cell line	paired-end	no	G12D	-
	Panc10.05	1cf42378-5924-40af-aa80-85cd6f6d0173	cell line	paired-end	no	G12D	-
	PANC-1	ac5a0adb-81e0-493c-a17f-b55c72b43fa7	cell line	paired-end	no	G12D	-
	PA-TU-8902	c80a8580-8f79-4acc-aeaf-1afb145b1dbc	cell line	paired-end	no	G12V	-
	PA-TU-8988S	2a2f4666-2893-4357-a3c5-34f5523f7ac3	cell line	paired-end	no	G12V	-
	PK-1	db7f1fbe-f5cb-482f-b537-d94983600e13	cell line	paired-end	no	G12D	-
	PK-45H	8b15bc54-1ef1-43b3-a373-3000bbf4706b	cell line	paired-end	no	G12D	-
	PK-59	7139fdce-e4ec-451c-967d-a5f306e6710c	cell line	paired-end	no	G12D	-
	PSN1	7a25f112-e80d-4b3e-83e1-f6a2b8c1d827	cell line	paired-end	no	G12R	-
	QGP-1	615c0218-1c12-4f69-8eec-6c3c5fcdf87f	cell line	paired-end	no	G12V	-
	SNU-213	9168f8e9-0558-4348-ad7d-289a586d14d7	cell line	paired-end	no	G12V	-
	SNU-324	13924031-19ce-4fcb-b023-5b2e3aefdf77	cell line	paired-end	no	wt	EML4-ALK	found	found	found¹	found	found	found	found
	SNU-410	0f6d5995-ffcc-4f0f-9247-bd9b5d7db5e1	cell line	paired-end	no	G12D	-
	SU.86.86	036c14a2-c62c-4a40-827b-82a9ba54acbd	cell line	paired-end	no	G12D	-
	Suit-2	2ae92105-b8a3-44fe-a035-a27332fd96b2	cell line	paired-end	no	G12D	-
	SW1990	066c6486-1b31-4cfc-9e05-66de0b4539c3	cell line	paired-end	no	G12D	-
	T3M-4	792f86ea-1c9c-42d2-9c3a-4f1426d0c7a3	cell line	paired-end	no	Q61H	-
	TCC-PAN2	986bb9ee-154e-4024-86d8-b79ba7cb07cd	cell line	paired-end	no	G12R	-
	YAPC	cd90dd34-063c-4d62-9e34-3d442de3d164	cell line	paired-end	no	G12V	-
Bryant et al. ERP107752	HPAF-I	ERR2496065	cell line	paired-end	no	G12D	-
	Pa01C	ERR2496067	cell line	paired-end	no	G12D	-
	Pa02C	ERR2496068	cell line	paired-end	no	Q61H	-
	Pa04C	ERR2496071	cell line	paired-end	no	G12V	-
Bhattacharyya et al. SRP102440	Pa07C	SRR5376167	cell line	single-end	no	G12D	-		N/A²	N/A²		N/A²	N/A²
	Pa08C	SRR5376168	cell line	single-end	no	G12V	-		N/A²	N/A²		N/A²	N/A²
	Pa10C	SRR5376166	cell line	single-end	no	G12D, I187V	-		N/A²	N/A²		N/A²	N/A²
Diafera et al. SRP051606	PT-45-P1	SRR1736498	cell line	paired-end	no	G13D	-
Kirby et al. SRP072492 SRP072493	Panc6	SRR3308942	cell line	paired-end	no	G12D	-
	T_03_11_A244a	SRR3308890	primary	paired-end	no	wt	-
	T_04_02_A274c	SRR3308892	primary	paired-end	no	Q61H	-
	T_04_04_A207b	SRR3308898	primary	paired-end	no	G12D	-
	T_04_06_A027c	SRR3308899	primary	paired-end	no	G12D	-
	T_04_12_A158b	SRR3308900	primary	paired-end	no	G12R	-
	T_05_01_A082b	SRR3308901	primary	paired-end	no	G12D	-
	T_05_03_A215c	SRR3308902	primary	paired-end	no	G12V	-
	T_05_06_A121b	SRR3308903	primary	paired-end	no	G12V	-
	T_05_08_A230b	SRR3308904	primary	paired-end	no	G12D	DNAJB1-PRKACA	found	found	found	found	missed	found	found
	T_06_01_A033a_T	SRR3308884	primary	paired-end	no	G12D	-
	T_06_02_A026a	SRR3308905	primary	paired-end	no	G12D	-
	T_06_04_A296a_T	SRR3308886	primary	paired-end	no	G12V	-
	T_06_05_A309a_3	SRR3308906	primary	paired-end	no	G12D, S181P	-
	T_06_06_A349a	SRR3308888	primary	paired-end	no	G12D	-
	T_06_09_A196a_2	SRR3308907	primary	paired-end	no	G12V	-
	T_06_11_A168a	SRR3308885	primary	paired-end	no	G12D	-
	T_06_11_A299b	SRR3308908	primary	paired-end	no	G12S	-
	T_06_11_A455b	SRR3308897	primary	paired-end	no	G12V	-
	T_07_02_A073a	SRR3308909	primary	paired-end	no	wt	-
	T_07_02_A181a	SRR3308910	primary	paired-end	no	G12D	-
	T_07_02_A216a	SRR3308911	primary	paired-end	no	G12V	-
	T_07_03_A187a	SRR3308912	primary	paired-end	no	G12D(?)	-
	T_07_06_A104a	SRR3308913	primary	paired-end	no	G12R	-
	T_07_06_A323a_1	SRR3308914	primary	paired-end	no	wt	CDH1-NRG1	found	found	found	found	found	found	found
	T_07_07_A082a	SRR3308883	primary	paired-end	no	G12D	-
	T_07_08_A346a	SRR3308896	primary	paired-end	no	G12D	-
	T_07_09_A064a	SRR3308895	primary	paired-end	no	G12D	-
	T_07_10_A153a_1	SRR3308915	primary	paired-end	no	G12V	-
	T_07_10_A215a	SRR3308916	primary	paired-end	no	G12D	-
	T_07_10_A314a	SRR3308917	primary	paired-end	no	G12D	-
	T_07_11_A090a	SRR3308887	primary	paired-end	no	wt	PDZRN3-RAF1	found	missed	missed	missed	missed	missed	missed
	T_08_01_A194a	SRR3308918	primary	paired-end	no	G12R	-
	T_08_02_A333a	SRR3308919	primary	paired-end	no	G12D	-
	T_08_03_A203a	SRR3308920	primary	paired-end	no	G12V	-
	T_08_05_A123a	SRR3308921	primary	paired-end	no	G12D	-
	T_08_06_A060a	SRR3308922	primary	paired-end	no	wt	-
	T_10_10_A222aa	SRR3308923	primary	paired-end	no	G12D(?)	-
	T_10_11_A059a	SRR3308891	primary	paired-end	no	G12D	-
	T_10_11_A100a	SRR3308924	primary	paired-end	no	G12D(?)	-
	T_10_11_A128a	SRR3308925	primary	paired-end	no	G12V	-
	T_10_11_A130b	SRR3308926	primary	paired-end	no	E31K, Q61H	-
	T_10_12_A046a	SRR3308893	primary	paired-end	no	G12R	-
	T_10_12_A057a	SRR3308927	primary	paired-end	no	G12D	-
	T_11_02_A148a	SRR3308928	primary	paired-end	no	G12D	-
	T_11_02_A171a_2	SRR3308929	primary	paired-end	no	G12V	-
	T_11_03_A060a	SRR3308894	primary	paired-end	no	G12V, T144A, K182R	-
	T_11_03_A138a	SRR3308889	primary	paired-end	no	G12D	-
	T_11_04_A026b	SRR3308930	primary	paired-end	no	G12D	-
	T_11_05_A018b	SRR3308931	primary	paired-end	no	G12D	-
	T_11_06_A011a	SRR3308932	primary	paired-end	no	A11G, G12C	-
	T_11_06_A104a	SRR3308933	primary	paired-end	no	G12V	-
Aung et al. EGAD00001003584 EGAD00001003582	COMP-0001	EGAF00001725477, EGAF00001745323, EGAF00001745324	metastasis	paired-end	yes	G12D	-
	COMP-0002	EGAF00001725478, EGAF00001745325, EGAF00001745326	metastasis	paired-end	yes	wt	PFKFB4-RAF1	found	found	found	missed	found	found	found
	COMP-0004	EGAF00001725479, EGAF00001745327, EGAF00001745328	metastasis	paired-end	yes	G12V	-
	COMP-0005	EGAF00001725480, EGAF00001745329, EGAF00001745330	metastasis	paired-end	yes	G12V	-
	COMP-0006	EGAF00001725481, EGAF00001745331, EGAF00001745332	metastasis	paired-end	yes	G12V	-
	COMP-0007	EGAF00001725482, EGAF00001745333, EGAF00001745334	metastasis	paired-end	yes	G12D	-
	COMP-0008	EGAF00001725483, EGAF00001745335, EGAF00001745336	metastasis	paired-end	yes	G12D	-
	COMP-0009	EGAF00001725485, EGAF00001745339, EGAF00001745340	metastasis	paired-end	yes	G12V	-
	COMP-0010	EGAF00001725484, EGAF00001745337, EGAF00001745338	metastasis	paired-end	yes	G12D	-
	COMP-0011	EGAF00001725486, EGAF00001745341, EGAF00001745342	metastasis	paired-end	yes	wt	-
	COMP-0012	EGAF00001725487, EGAF00001745343, EGAF00001745344	metastasis	paired-end	yes	G12R	-
	COMP-0013	EGAF00001725488, EGAF00001745357, EGAF00001745358	metastasis	paired-end	yes	G12V	-
	COMP-0014	EGAF00001725476, EGAF00001745321, EGAF00001745322	metastasis	paired-end	yes	G12R	-
	COMP-0015	EGAF00001725489, EGAF00001745359, EGAF00001745360	metastasis	paired-end	yes	G12V	-
	COMP-0017	EGAF00001725490, EGAF00001745361, EGAF00001745362	primary	paired-end	yes	G12D, 14‑19del	-
	COMP-0018	EGAF00001725491, EGAF00001745363, EGAF00001745364	metastasis	paired-end	yes	G12D	-
	COMP-0019	EGAF00001725492, EGAF00001745365, EGAF00001745366	metastasis	paired-end	yes	G12D	-
	COMP-0020	EGAF00001725493, EGAF00001745367, EGAF00001745368	metastasis	paired-end	yes	G12D	-		N/A⁴
	COMP-0021	EGAF00001725494, EGAF00001745369, EGAF00001745370	metastasis	paired-end	yes	G12V	-
	COMP-0023	EGAF00001725495, EGAF00001745371, EGAF00001745372	metastasis	paired-end	yes	wt	EML4-NTRK3	found	found	found	found	missed	found	found
	COMP-0025	EGAF00001725496, EGAF00001745373, EGAF00001745374	metastasis	paired-end	yes	wt	-
	COMP-0026	EGAF00001725497, EGAF00001745375, EGAF00001745376	metastasis	paired-end	yes	G12D	-
	COMP-0028	EGAF00001725498, EGAF00001745377, EGAF00001745378	metastasis	paired-end	yes	wt	ATP1B1-PRKACA	found	found	found	found	found	found	found
	COMP-0029	EGAF00001725500, EGAF00001745381, EGAF00001745382	primary	paired-end	yes	G12D	-
	COMP-0030	EGAF00001725499, EGAF00001745379, EGAF00001745380	metastasis	paired-end	yes	G12R	-
	COMP-0032	EGAF00001725501, EGAF00001745383, EGAF00001745384	metastasis	paired-end	yes	G12R	-
	COMP-0033	EGAF00001725502, EGAF00001745385, EGAF00001745386	metastasis	paired-end	yes	G12V	-
	COMP-0034	EGAF00001725503, EGAF00001745387, EGAF00001745388	metastasis	paired-end	yes	G12D	-
	COMP-0035	EGAF00001725504, EGAF00001745289, EGAF00001745290	metastasis	paired-end	yes	G12D	-
	COMP-0036	EGAF00001725505, EGAF00001745291, EGAF00001745292	primary	paired-end	yes	G12V	-
	COMP-0037	EGAF00001725506, EGAF00001745293, EGAF00001745294	metastasis	paired-end	yes	G12V	-
	COMP-0038	EGAF00001725507, EGAF00001745295, EGAF00001745296	metastasis	paired-end	yes	G12D	-
	COMP-0039	EGAF00001725508, EGAF00001745297, EGAF00001745298	metastasis	paired-end	yes	G12D	-
	COMP-0041	EGAF00001725509, EGAF00001745299, EGAF00001745300	metastasis	paired-end	yes	G12D	-
	COMP-0042	EGAF00001725510, EGAF00001745301, EGAF00001745302	primary	paired-end	yes	G12D	-
	COMP-0043	EGAF00001725511, EGAF00001745303, EGAF00001745304	metastasis	paired-end	yes	G12V	-
	COMP-0044	EGAF00001725512, EGAF00001745305, EGAF00001745306	primary	paired-end	yes	G12R	-
	COMP-0045	EGAF00001725513, EGAF00001745307, EGAF00001745308	metastasis	paired-end	yes	G12V	-
	COMP-0046	EGAF00001725514, EGAF00001745309, EGAF00001745310	metastasis	paired-end	yes	G12V	-
	COMP-0047	EGAF00001725515, EGAF00001745311, EGAF00001745312	metastasis	paired-end	yes	wt	-
	COMP-0048	EGAF00001725516, EGAF00001745313, EGAF00001745314	metastasis	paired-end	yes	G12R	-
	COMP-0049	EGAF00001725518, EGAF00001745317, EGAF00001745318	primary	paired-end	yes	G12D	-
	COMP-0050	EGAF00001725517, EGAF00001745315, EGAF00001745316	metastasis	paired-end	yes	G12D	-
	COMP-0052	EGAF00001725519, EGAF00001745319, EGAF00001745320	metastasis	paired-end	yes	G12D	-
	COMP-0055	EGAF00001725520, EGAF00001745345, EGAF00001745346	metastasis	paired-end	yes	wt	RRBP1-RAF1	found	found	found	found	found	found	found
	COMP-0056	EGAF00001725521, EGAF00001745347, EGAF00001745348	metastasis	paired-end	yes	G12V	-
	COMP-0057	EGAF00001725522, EGAF00001745349, EGAF00001745350	metastasis	paired-end	yes	wt	-
	COMP-0058-G	EGAF00001725523, EGAF00001745351, EGAF00001745352	metastasis	paired-end	yes	G12D	-
	COMP-0059	EGAF00001725524, EGAF00001745353, EGAF00001745354	primary	paired-end	yes	G12V	-
	COMP-0060	EGAF00001725525, EGAF00001745355, EGAF00001745356	metastasis	paired-end	yes	G12D	-
Nicolle et al. ERP022034	PDAC001T	ERR1880117, ERR1880118	PDX	paired-end	no	G12D	-
	PDAC003T	ERR1880119, ERR1880120	PDX	paired-end	no	G12D	-
	PDAC004T	ERR1880121, ERR1880122	PDX	paired-end	no	G12D	-
	PDAC005T	ERR1880123, ERR1880124	PDX	paired-end	no	G12V	-
	PDAC006T	ERR1880125, ERR1880126	PDX	paired-end	no	G12V	-
	PDAC007T	ERR1880127, ERR1880128	PDX	paired-end	no	G12D	-
	PDAC008T	ERR1880129, ERR1880130	PDX	paired-end	no	G12D	-
	PDAC009T	ERR1880131, ERR1880132	PDX	paired-end	no	wt	FGFR2-G3BP2	found	found	found¹	found	found	found	found
	PDAC011T	ERR1880133, ERR1880134	PDX	paired-end	no	G12D	-
	PDAC012T	ERR1880135, ERR1880136	PDX	paired-end	no	Q61K	-
	PDAC013T	ERR1880137, ERR1880138	PDX	paired-end	no	G12D	-
	PDAC014T	ERR1880139, ERR1880140	PDX	paired-end	no	G12V	-
	PDAC015T	ERR1880141, ERR1880142	PDX	paired-end	no	G12D	-
	PDAC016T	ERR1880143, ERR1880144	PDX	paired-end	no	G12R	-
	PDAC017T	ERR1880145, ERR1880146	PDX	paired-end	no	G12V	-
	PDAC018T	ERR1880147, ERR1880148	PDX	paired-end	no	G12D	-
	PDAC019T	ERR1880149, ERR1880150	PDX	paired-end	no	G12V	-
	PDAC020T	ERR1880151, ERR1880152	PDX	paired-end	no	G12D	-
	PDAC021T	ERR1880153, ERR1880154	PDX	paired-end	no	G12V	-
	PDAC022T	ERR1880155, ERR1880156	PDX	paired-end	no	G12R	-
	PDAC023T	ERR1880157, ERR1880158	PDX	paired-end	no	G12C	-
	PDAC024T	ERR1880159, ERR1880160	PDX	paired-end	no	G12D	-
	PDAC025T	ERR1880161, ERR1880162	PDX	paired-end	no	G12D	-
	PDAC026T	ERR1880163, ERR1880164	PDX	paired-end	no	G12R	-
	PDAC027T	ERR1880165, ERR1880166	PDX	paired-end	no	G12V	-
	PDAC028T	ERR1880167, ERR1880168	PDX	paired-end	no	G12V	-
	PDAC029T	ERR1880169, ERR1880170	PDX	paired-end	no	G12D	-
	PDAC030T	ERR1880171	PDX	paired-end	no	G12V	-
	PDAC031T	ERR1880172	PDX	paired-end	no	G12D	-
	PDAC032T	ERR1880173, ERR1880174	PDX	paired-end	no	G12V	-
Lomberk et al. ERP023824	1119	ERR2019716	PDX	paired-end	no	G12R	-
	2083	ERR2019721	PDX	paired-end	no	Q61H	-
	2087	ERR2019722	PDX	paired-end	no	G12C	-
	2099	ERR2019723	PDX	paired-end	no	G12D	-
	2116	ERR2019724	PDX	paired-end	no	G12R	-
	AH.IP	ERR2019727	PDX	paired-end	no	G12V	-
	B.Tim	ERR2019730	PDX	paired-end	no	G12D	-
	foie8	ERR2019732	PDX	paired-end	no	G12D	-
Carugo et al. ERP015474	Patient 53	ERR1457377, ERR1457378, ERR1457379	PDX	paired-end	no	G12D	-
ICGC-PACA-AU EGAD00001003410	ICGC_0006	EGAF00001682685	primary	paired-end	yes	G12D	-
	ICGC_0007	EGAF00001682826	primary	paired-end	yes	G12D	-
	ICGC_0009	EGAF00001682820	primary	paired-end	yes	G12D	-
	ICGC_0020	EGAF00001682847	primary	paired-end	yes	G12D	-
	ICGC_0021	EGAF00001682676	primary	paired-end	yes	G12D	-
	ICGC_0025	EGAF00001682769	primary	paired-end	yes	G12D	-
	ICGC_0026	EGAF00001682841	primary	paired-end	yes	G12V	-
	ICGC_0031	EGAF00001682829	primary	paired-end	yes	G12V	-
	ICGC_0033	EGAF00001682796	primary	paired-end	yes	G12D	-
	ICGC_0037	EGAF00001682880	primary	paired-end	yes	G12R	-
	ICGC_0048	EGAF00001682814	primary	paired-end	yes	G12V	-
	ICGC_0051	EGAF00001682742	primary	paired-end	yes	G12D	-
	ICGC_0052	EGAF00001682775	primary	paired-end	yes	G12D	-
	ICGC_0053	EGAF00001682853	primary	paired-end	yes	wt	-
	ICGC_0054	EGAF00001682811	primary	paired-end	yes	G12V	-
	ICGC_0055	EGAF00001682718	primary	paired-end	yes	G12R	-
	ICGC_0059	EGAF00001682886	primary	paired-end	yes	G12V	-
	ICGC_0061	EGAF00001682790	primary	paired-end	yes	G12V	-
	ICGC_0063	EGAF00001682721	primary	paired-end	yes	wt	-
	ICGC_0066	EGAF00001682682	primary	paired-end	yes	G12D	-
	ICGC_0067	EGAF00001682823	primary	paired-end	yes	Q61K	-
	ICGC_0087	EGAF00001682673	primary	paired-end	yes	G12D	-
	ICGC_0088	EGAF00001682757	primary	paired-end	yes	G12D	-
	ICGC_0099	EGAF00001682859	primary	paired-end	yes	G12R	-
	ICGC_0103	EGAF00001682817	primary	paired-end	yes	G12R	-
	ICGC_0105	EGAF00001682808	primary	paired-end	yes	G12R	-
	ICGC_0109	EGAF00001682712	primary	paired-end	yes	G12V	-
	ICGC_0114	EGAF00001682766	primary	paired-end	yes	G12R	-
	ICGC_0115	EGAF00001682700	primary	paired-end	yes	G12R	-
	ICGC_0124	EGAF00001682751	primary	paired-end	yes	G12V	-
	ICGC_0134	EGAF00001682754	primary	paired-end	yes	G12D	-
	ICGC_0135	EGAF00001682736	primary	paired-end	yes	G12R	-
	ICGC_0139	EGAF00001682850	primary	paired-end	yes	Q61H	-
	ICGC_0140	EGAF00001682805	primary	paired-end	yes	G12R	-
	ICGC_0141	EGAF00001682664	primary	paired-end	yes	G12V	-
	ICGC_0143	EGAF00001682763	primary	paired-end	yes	G12D	-
	ICGC_0144	EGAF00001682739	primary	paired-end	yes	G12V	-
	ICGC_0146	EGAF00001682661	primary	paired-end	yes	Q61H	-
	ICGC_0149	EGAF00001682745	primary	paired-end	yes	G12D	-
	ICGC_0153	EGAF00001682688	primary	paired-end	yes	Q61H	-
	ICGC_0169	EGAF00001682799	primary	paired-end	yes	G12D	-
	ICGC_0185	EGAF00001682667	primary	paired-end	yes	G12D	-
	ICGC_0188	EGAF00001682703	primary	paired-end	yes	G12A	-
	ICGC_0192	EGAF00001682706	primary	paired-end	yes	G12V	-
	ICGC_0199	EGAF00001682862	primary	paired-end	yes	G12D	-
	ICGC_0201	EGAF00001682856	primary	paired-end	yes	G12V	-
	ICGC_0205	EGAF00001682895	primary	paired-end	yes	Q61H	-
	ICGC_0206	EGAF00001682844	primary	paired-end	yes	G12D	-
	ICGC_0207	EGAF00001682883	primary	paired-end	yes	G12D	-
	ICGC_0214	EGAF00001682877	primary	paired-end	yes	wt	-
	ICGC_0215	EGAF00001682784	primary	paired-end	yes	G12V	-
	ICGC_0223	EGAF00001682793	primary	paired-end	yes	G12R	-
	ICGC_0227	EGAF00001682760	primary	paired-end	yes	G12D	-
	ICGC_0235	EGAF00001682832	primary	paired-end	yes	G12R	-
	ICGC_0295	EGAF00001682748	primary	paired-end	yes	G12D	-
	ICGC_0296	EGAF00001682694	primary	paired-end	yes	G12V	-
	ICGC_0300	EGAF00001682865	primary	paired-end	yes	G12R	-
	ICGC_0304	EGAF00001682787	primary	paired-end	yes	G12R	-
	ICGC_0309	EGAF00001682730	primary	paired-end	yes	G12V	-
	ICGC_0312	EGAF00001682892	primary	paired-end	yes	G12D	-
	ICGC_0313	EGAF00001682778	primary	paired-end	yes	G12R	-
	ICGC_0315	EGAF00001682901	primary	paired-end	yes	G12D	-
	ICGC_0321	EGAF00001682772	primary	paired-end	yes	G12D	-
	ICGC_0326	EGAF00001682874	primary	paired-end	yes	G12R	-
	ICGC_0338	EGAF00001682709	primary	paired-end	yes	wt	SND1-BRAF	found	found	found	found	found	missed	found
	ICGC_0365	EGAF00001682724	primary	paired-end	yes	G12D	-
	ICGC_0391	EGAF00001682868	primary	paired-end	yes	wt	CCDC6-RET	found	found	found	found	found	found	found
	ICGC_0393	EGAF00001682679	primary	paired-end	yes	G12C	-
	ICGC_0395	EGAF00001682802	primary	paired-end	yes	wt	-
	ICGC_0406	EGAF00001682871	primary	paired-end	yes	G12V	-
	ICGC_0412	EGAF00001682697	primary	paired-end	yes	G12R	-
	ICGC_0417	EGAF00001682838	primary	paired-end	yes	G12R	-
	ICGC_0420	EGAF00001682835	primary	paired-end	yes	G12V	-
	ICGC_0502	EGAF00001682715	primary	paired-end	yes	G12D	-
	ICGC_0503	EGAF00001682691	primary	paired-end	yes	G12D	-
	ICGC_0507	EGAF00001682670	primary	paired-end	yes	G12R	-
	ICGC_0518	EGAF00001682889	primary	paired-end	yes	Q61H	-
	ICGC_0521	EGAF00001682727	primary	paired-end	yes	G12D	-
	ICGC_0526	EGAF00001682898	primary	paired-end	yes	G12D	-
PACA-CA EGAD00001003945 EGAD00001003972	PCSI_0015	EGAF00001844234, EGAF00001878928, EGAF00001878929	primary	paired-end	yes	wt	-
	PCSI_0019	EGAF00001844235, EGAF00001878930, EGAF00001878931	primary	paired-end	yes	G12R	-
	PCSI_0044	EGAF00001844236, EGAF00001878932, EGAF00001878933	primary	paired-end	yes	G12V	-
	PCSI_0046	EGAF00001844237, EGAF00001878934, EGAF00001878935	primary	paired-end	yes	G12V	-
	PCSI_0047	EGAF00001844238, EGAF00001878936, EGAF00001878937	primary	paired-end	yes	G12D	-
	PCSI_0048	EGAF00001844239, EGAF00001878938, EGAF00001878939	primary	paired-end	yes	G12R	-
	PCSI_0072	EGAF00001844250, EGAF00001878940, EGAF00001878941	primary	paired-end	yes	G12D	-
	PCSI_0073	EGAF00001844251, EGAF00001878942, EGAF00001878943	primary	paired-end	yes	G12D	-
	PCSI_0074	EGAF00001844252, EGAF00001878944, EGAF00001878945	primary	paired-end	yes	G12D	-
	PCSI_0075	EGAF00001844253, EGAF00001878946, EGAF00001878947	primary	paired-end	yes	G12D	-
	PCSI_0077	EGAF00001844254, EGAF00001878948, EGAF00001878949	primary	paired-end	yes	G12V	-
	PCSI_0078	EGAF00001844255, EGAF00001878950, EGAF00001878951	primary	paired-end	yes	G12V	-
	PCSI_0080	EGAF00001844256, EGAF00001878952, EGAF00001878953	primary	paired-end	yes	G12V	-
	PCSI_0081	EGAF00001844257, EGAF00001878954, EGAF00001878955	primary	paired-end	yes	Q61H	-
	PCSI_0083	EGAF00001844259, EGAF00001878958, EGAF00001878959	primary	paired-end	yes	wt	-
	PCSI_0084	EGAF00001844260, EGAF00001878960, EGAF00001878961	primary	paired-end	yes	G12V	-
	PCSI_0085	EGAF00001844261, EGAF00001878962, EGAF00001878963	primary	paired-end	yes	G12V	-
	PCSI_0090	EGAF00001844262, EGAF00001878964, EGAF00001878965	primary	paired-end	yes	wt	-
	PCSI_0096	EGAF00001844263, EGAF00001878966, EGAF00001878967	primary	paired-end	yes	G12R	-
	PCSI_0098	EGAF00001844264, EGAF00001878968, EGAF00001878969	primary	paired-end	yes	G12D	-
	PCSI_0099	EGAF00001844265, EGAF00001878970, EGAF00001878971	primary	paired-end	yes	G12V	-
	PCSI_0101	EGAF00001844281, EGAF00001878972, EGAF00001878973	primary	paired-end	yes	G12D	-
	PCSI_0102	EGAF00001844282, EGAF00001878974, EGAF00001878975	primary	paired-end	yes	G12R	-
	PCSI_0103	EGAF00001844283, EGAF00001878976, EGAF00001878977	primary	paired-end	yes	G12V	-
	PCSI_0104	EGAF00001844284, EGAF00001878978, EGAF00001878979	primary	paired-end	yes	Q61R	-
	PCSI_0105	EGAF00001844285, EGAF00001878980, EGAF00001878981	primary	paired-end	yes	Q61H	-
	PCSI_0106	EGAF00001844286, EGAF00001878982, EGAF00001878983	primary	paired-end	yes	G12D	-
	PCSI_0107	EGAF00001844287, EGAF00001878984, EGAF00001878985	primary	paired-end	yes	G12D	-
	PCSI_0108	EGAF00001844288, EGAF00001878986, EGAF00001878987	primary	paired-end	yes	wt	PDZRN3-RAF1	found	missed	found	missed	missed	missed	missed
	PCSI_0109	EGAF00001844289, EGAF00001878988, EGAF00001878989	primary	paired-end	yes	G12D	-
	PCSI_0111	EGAF00001844290, EGAF00001878990, EGAF00001878991	primary	paired-end	yes	Q61H	-
	PCSI_0132	EGAF00001844291, EGAF00001878992, EGAF00001878993	primary	paired-end	yes	Q61H	-
	PCSI_0142	EGAF00001844292, EGAF00001878994, EGAF00001878995	primary	paired-end	yes	G12A	-
	PCSI_0145	EGAF00001844293, EGAF00001878996, EGAF00001878997	primary	paired-end	yes	wt	-
	PCSI_0146	EGAF00001844294, EGAF00001878998, EGAF00001878999	primary	paired-end	yes	G12V	-
	PCSI_0161	EGAF00001844295, EGAF00001879000, EGAF00001879001	primary	paired-end	yes	G12D	-
	PCSI_0162	EGAF00001844296, EGAF00001879002, EGAF00001879003	primary	paired-end	yes	G12R	-
	PCSI_0164	EGAF00001844313, EGAF00001879004, EGAF00001879005	primary	paired-end	yes	E37D	-
	PCSI_0169	EGAF00001844314, EGAF00001879006, EGAF00001879007	primary	paired-end	yes	G12D	-
	PCSI_0170	EGAF00001844316, EGAF00001879010, EGAF00001879011	primary	paired-end	yes	G12V	-
	PCSI_0171	EGAF00001844317, EGAF00001879012, EGAF00001879013	primary	paired-end	yes	wt	-
	PCSI_0173	EGAF00001844318, EGAF00001879014, EGAF00001879015	primary	paired-end	yes	G12V	-
	PCSI_0174	EGAF00001844319, EGAF00001879016, EGAF00001879017	primary	paired-end	yes	G12V	-
	PCSI_0175	EGAF00001844320, EGAF00001879018, EGAF00001879019	primary	paired-end	yes	G12V	-
	PCSI_0208	EGAF00001844321, EGAF00001879020, EGAF00001879021	primary	paired-end	yes	G12R	-
	PCSI_0210	EGAF00001844322, EGAF00001879022, EGAF00001879023	primary	paired-end	yes	G12D	-
	PCSI_0217	EGAF00001844323, EGAF00001879024, EGAF00001879025	primary	paired-end	yes	G12D	-
	PCSI_0218	EGAF00001844324, EGAF00001879026, EGAF00001879027	primary	paired-end	yes	G12R	-
	PCSI_0224	EGAF00001844325, EGAF00001879028, EGAF00001879029	primary	paired-end	yes	Q61H	-
	PCSI_0226	EGAF00001844326, EGAF00001879030, EGAF00001879031	primary	paired-end	yes	G12D	-
	PCSI_0227	EGAF00001844327, EGAF00001879032, EGAF00001879033	primary	paired-end	yes	G12V	-
	PCSI_0228	EGAF00001844328, EGAF00001879034, EGAF00001879035	primary	paired-end	yes	Q61L	-
	PCSI_0230	EGAF00001844332, EGAF00001879036, EGAF00001879037	primary	paired-end	yes	G12D	-
	PCSI_0233	EGAF00001844333, EGAF00001879038, EGAF00001879039	primary	paired-end	yes	G12D	-
	PCSI_0235	EGAF00001844334, EGAF00001879040, EGAF00001879041	primary	paired-end	yes	G12V	-
	PCSI_0240	EGAF00001844335, EGAF00001879042, EGAF00001879043	primary	paired-end	yes	G12D	-
	PCSI_0261	EGAF00001844336, EGAF00001879044, EGAF00001879045	primary	paired-end	yes	G12V	-
	PCSI_0263	EGAF00001844337, EGAF00001879046, EGAF00001879047	primary	paired-end	yes	G12V	-
	PCSI_0264	EGAF00001844338, EGAF00001879048, EGAF00001879049	primary	paired-end	yes	G12D	-
	PCSI_0268	EGAF00001844339, EGAF00001879050, EGAF00001879051	primary	paired-end	yes	G12V	-
	PCSI_0269	EGAF00001844340, EGAF00001879052, EGAF00001879053	primary	paired-end	yes	G12V	-
	PCSI_0274	EGAF00001844341, EGAF00001879054, EGAF00001879055	primary	paired-end	yes	G12V	-
	PCSI_0279	EGAF00001844342, EGAF00001879056, EGAF00001879057	primary	paired-end	yes	G12R	KANK1-NTRK3	found	found	found	found	missed	found	found
	PCSI_0280	EGAF00001844343, EGAF00001879058, EGAF00001879059	primary	paired-end	yes	G12V	-
	PCSI_0283	EGAF00001844344, EGAF00001879060, EGAF00001879061	primary	paired-end	yes	G12V	-
	PCSI_0284	EGAF00001844345, EGAF00001879062, EGAF00001879063	primary	paired-end	yes	G12V	-
	PCSI_0285	EGAF00001844346, EGAF00001879064, EGAF00001879065	primary	paired-end	yes	G12V	-
	PCSI_0286	EGAF00001844347, EGAF00001879066, EGAF00001879067	primary	paired-end	yes	wt	-
	PCSI_0287	EGAF00001844348, EGAF00001879068, EGAF00001879069	primary	paired-end	yes	G13D	-
	PCSI_0290	EGAF00001844358, EGAF00001879070, EGAF00001879071	primary	paired-end	yes	G12R	-
	PCSI_0292	EGAF00001844359, EGAF00001879072, EGAF00001879073	primary	paired-end	yes	G12R	-
	PCSI_0294	EGAF00001844360, EGAF00001879074, EGAF00001879075	primary	paired-end	yes	G12D	-
	PCSI_0295	EGAF00001844361, EGAF00001879076, EGAF00001879077	primary	paired-end	yes	G12V	-
	PCSI_0297	EGAF00001844362, EGAF00001879078, EGAF00001879079	primary	paired-end	yes	G12D	-
	PCSI_0300	EGAF00001844363, EGAF00001879080, EGAF00001879081	primary	paired-end	yes	G12V	-
	PCSI_0301	EGAF00001844364, EGAF00001879082, EGAF00001879083	primary	paired-end	yes	G12V	-
	PCSI_0302	EGAF00001844365, EGAF00001879084, EGAF00001879085	primary	paired-end	yes	G12V	-
	PCSI_0303	EGAF00001844366, EGAF00001879086, EGAF00001879087	primary	paired-end	yes	G12R	-
	PCSI_0305	EGAF00001844367, EGAF00001879088, EGAF00001879089	primary	paired-end	yes	wt	EML4-NTRK3	found	found	found	missed	missed	found	found
	PCSI_0307	EGAF00001844368, EGAF00001879090, EGAF00001879091	primary	paired-end	yes	G12D	-
	PCSI_0309	EGAF00001844369, EGAF00001879092, EGAF00001879093	primary	paired-end	yes	G12V	-
	PCSI_0310	EGAF00001844370, EGAF00001879094, EGAF00001879095	primary	paired-end	yes	G12V	-
	PCSI_0311	EGAF00001844371, EGAF00001879096, EGAF00001879097	primary	paired-end	yes	G12R	-
	PCSI_0312	EGAF00001844372, EGAF00001879098, EGAF00001879099	primary	paired-end	yes	G12D	-
	PCSI_0324	EGAF00001844373, EGAF00001879100, EGAF00001879101	primary	paired-end	yes	G12V	-
	PCSI_0325	EGAF00001844547, EGAF00001879102, EGAF00001879103	primary	paired-end	yes	G12V	-
	PCSI_0326	EGAF00001844548, EGAF00001879104, EGAF00001879105	primary	paired-end	yes	wt	TRIM24-BRAF	found	missed	found	missed	missed	missed	missed
	PCSI_0328	EGAF00001844549, EGAF00001879106, EGAF00001879107	primary	paired-end	yes	wt	-
	PCSI_0329	EGAF00001844550, EGAF00001879108, EGAF00001879109	primary	paired-end	yes	G12D	-
	PCSI_0330	EGAF00001844551, EGAF00001879110, EGAF00001879111	primary	paired-end	yes	wt	ATP1B1-PRKACA	found	found	found	found	found	found	found
	PCSI_0334	EGAF00001844552, EGAF00001879112, EGAF00001879113	primary	paired-end	yes	G12R	-
	PCSI_0337	EGAF00001844553, EGAF00001879114, EGAF00001879115	primary	paired-end	yes	G12D	-
	PCSI_0338	EGAF00001844554, EGAF00001879116, EGAF00001879117	primary	paired-end	yes	G12D	-
	PCSI_0339	EGAF00001844555, EGAF00001879118, EGAF00001879119	primary	paired-end	yes	wt	-
	PCSI_0340	EGAF00001844556, EGAF00001879120, EGAF00001879121	primary	paired-end	yes	G12D	-
	PCSI_0341	EGAF00001844557, EGAF00001879122, EGAF00001879123	primary	paired-end	yes	Q61R	-
	PCSI_0343	EGAF00001844558, EGAF00001879124, EGAF00001879125	primary	paired-end	yes	G12D	-
	PCSI_0344	EGAF00001844559, EGAF00001879126, EGAF00001879127	primary	paired-end	yes	G12R	-
	PCSI_0345	EGAF00001844560, EGAF00001879128, EGAF00001879129	primary	paired-end	yes	G12D	-
	PCSI_0347	EGAF00001844561, EGAF00001879130, EGAF00001879131	primary	paired-end	yes	wt	SLC4A4-ROS1	found	found	found	found	found	missed	found
	PCSI_0350	EGAF00001844562, EGAF00001879132, EGAF00001879133	primary	paired-end	yes	G12R	-
	PCSI_0351	EGAF00001844563, EGAF00001879134, EGAF00001879135	primary	paired-end	yes	G12V	-
	PCSI_0352	EGAF00001844564, EGAF00001879136, EGAF00001879137	primary	paired-end	yes	G12R	-
	PCSI_0353	EGAF00001844565, EGAF00001879138, EGAF00001879139	primary	paired-end	yes	G12D	-
	PCSI_0354	EGAF00001844566, EGAF00001879140, EGAF00001879141	primary	paired-end	yes	G12R	-
	PCSI_0355	EGAF00001844567, EGAF00001879142, EGAF00001879143	primary	paired-end	yes	G12R	-
	PCSI_0356	EGAF00001844569, EGAF00001879146, EGAF00001879147	primary	paired-end	yes	Q61H	-
	PCSI_0357	EGAF00001844570, EGAF00001879148, EGAF00001879149	primary	paired-end	yes	G12R	-
	PCSI_0358	EGAF00001844571, EGAF00001879150, EGAF00001879151	primary	paired-end	yes	G12R	-
	PCSI_0383	EGAF00001844572, EGAF00001879152, EGAF00001879153	primary	paired-end	yes	G12V	-
	PCSI_0384	EGAF00001844573, EGAF00001879154, EGAF00001879155	primary	paired-end	yes	G12D	-
	PCSI_0392	EGAF00001844574, EGAF00001879156, EGAF00001879157	primary	paired-end	yes	G12D	-
	PCSI_0402	EGAF00001844575, EGAF00001879158, EGAF00001879159	primary	paired-end	yes	G12D	-
	PCSI_0403	EGAF00001844576, EGAF00001879160, EGAF00001879161	primary	paired-end	yes	G13P	-
	PCSI_0404	EGAF00001844577, EGAF00001879162, EGAF00001879163	primary	paired-end	yes	G12V	-
	PCSI_0410	EGAF00001844581, EGAF00001879170, EGAF00001879171	metastasis	paired-end	yes	G12R	-
	PCSI_0449	EGAF00001844586, EGAF00001879180, EGAF00001879181	primary	paired-end	yes	G12R, K178E	-
	PCSI_0450	EGAF00001844587, EGAF00001879182, EGAF00001879183	primary	paired-end	yes	G12D	-
	PCSI_0451	EGAF00001844588, EGAF00001879184, EGAF00001879185	primary	paired-end	yes	G12D	-
	PCSI_0453	EGAF00001844589, EGAF00001879186, EGAF00001879187	primary	paired-end	yes	G12R	-
	PCSI_0456	EGAF00001844590, EGAF00001879188, EGAF00001879189	primary	paired-end	yes	G12D	-
	PCSI_0457	EGAF00001844591, EGAF00001879190, EGAF00001879191	primary	paired-end	yes	G12D	-
	PCSI_0458	EGAF00001844592, EGAF00001879192, EGAF00001879193	primary	paired-end	yes	wt	TRIM24-BRAF	found	found	missed	missed	missed	found	found
	PCSI_0460	EGAF00001844593, EGAF00001879194, EGAF00001879195	primary	paired-end	yes	G12D	-
	PCSI_0463	EGAF00001844594, EGAF00001879196, EGAF00001879197	primary	paired-end	yes	G12D	-
	PCSI_0465	EGAF00001844595, EGAF00001879198, EGAF00001879199	primary	paired-end	yes	G12V	-
	PCSI_0466	EGAF00001844596, EGAF00001879200, EGAF00001879201	primary	paired-end	yes	G12D	-
	PCSI_0467	EGAF00001844597, EGAF00001879202, EGAF00001879203	primary	paired-end	yes	G12V	-
	PCSI_0468	EGAF00001844598, EGAF00001879204, EGAF00001879205	primary	paired-end	yes	G12D	-
	PCSI_0469	EGAF00001844599, EGAF00001879206, EGAF00001879207	primary	paired-end	yes	G12R	-
	PCSI_0472	EGAF00001844600, EGAF00001879208, EGAF00001879209	primary	paired-end	yes	G12D	-
	PCSI_0473	EGAF00001844601, EGAF00001879210, EGAF00001879211	primary	paired-end	yes	G12V	-
	PCSI_0474	EGAF00001844602, EGAF00001879212, EGAF00001879213	primary	paired-end	yes	G12R	-
	PCSI_0475	EGAF00001844240, EGAF00001879214, EGAF00001879215	primary	paired-end	yes	G12R	-
	PCSI_0476	EGAF00001844241, EGAF00001879216, EGAF00001879217	primary	paired-end	yes	Q61L	-
	PCSI_0477	EGAF00001844242, EGAF00001879218, EGAF00001879219	primary	paired-end	yes	G12D	-
	PCSI_0492	EGAF00001844243, EGAF00001879220, EGAF00001879221	primary	paired-end	yes	G12R	-
	PCSI_0506	EGAF00001844244, EGAF00001879222, EGAF00001879223	primary	paired-end	yes	wt	-
	PCSI_0508	EGAF00001844245, EGAF00001879224, EGAF00001879225	primary	paired-end	yes	G12D	-
	PCSI_0509	EGAF00001844246, EGAF00001879226, EGAF00001879227	primary	paired-end	yes	G12V	-
	PCSI_0511	EGAF00001844247, EGAF00001879228, EGAF00001879229	primary	paired-end	yes	G12D	-
	PCSI_0518	EGAF00001844248, EGAF00001879230, EGAF00001879231	primary	paired-end	yes	G12D	-
	PCSI_0521	EGAF00001844249, EGAF00001879232, EGAF00001879233	primary	paired-end	yes	G12R	-
	PCSI_0527	EGAF00001844266, EGAF00001879234, EGAF00001879235	primary	paired-end	yes	G12D	-
	PCSI_0528	EGAF00001844267, EGAF00001879236, EGAF00001879237	primary	paired-end	yes	G12R	-
	PCSI_0529	EGAF00001844268, EGAF00001879238, EGAF00001879239	primary	paired-end	yes	G12D	-
	PCSI_0530	EGAF00001844269, EGAF00001879240, EGAF00001879241	primary	paired-end	yes	G12D	-
	PCSI_0531	EGAF00001844270, EGAF00001879242, EGAF00001879243	primary	paired-end	yes	G12R	-
	PCSI_0534	EGAF00001844271, EGAF00001879244, EGAF00001879245	primary	paired-end	yes	G12V	-
	PCSI_0537	EGAF00001844272, EGAF00001879246, EGAF00001879247	primary	paired-end	yes	G12D	-
	PCSI_0549	EGAF00001844273, EGAF00001879248, EGAF00001879249	primary	paired-end	yes	G12V	-
	PCSI_0572	EGAF00001844274, EGAF00001879250, EGAF00001879251	primary	paired-end	yes	wt	CDC42BPB-ALK	found	found	found	found	found	missed	found
	PCSI_0588	EGAF00001844275, EGAF00001879252, EGAF00001879253	primary	paired-end	yes	G12R	-
	PCSI_0589	EGAF00001844276, EGAF00001879254, EGAF00001879255	primary	paired-end	yes	G12R	-
	PCSI_0590	EGAF00001844278, EGAF00001879258, EGAF00001879259	primary	paired-end	yes	G12D	-
	PCSI_0591	EGAF00001844280, EGAF00001879262, EGAF00001879263	primary	paired-end	yes	Q61H	-
	PCSI_0592	EGAF00001844297, EGAF00001879264, EGAF00001879265	primary	paired-end	yes	G12D	-
	PCSI_0593	EGAF00001844299, EGAF00001879268, EGAF00001879269	primary	paired-end	yes	G12D	-
	PCSI_0594	EGAF00001844300, EGAF00001879270, EGAF00001879271	primary	paired-end	yes	G12V	-
	PCSI_0602	EGAF00001844301, EGAF00001879272, EGAF00001879273	primary	paired-end	yes	G12D	-
	PCSI_0608	EGAF00001844303, EGAF00001879276, EGAF00001879277	primary	paired-end	yes	wt	-
	PCSI_0609	EGAF00001844304, EGAF00001879278, EGAF00001879279	primary	paired-end	yes	wt	-
	PCSI_0610	EGAF00001844305, EGAF00001879280, EGAF00001879281	primary	paired-end	yes	G12R	-
	PCSI_0611	EGAF00001844306, EGAF00001879282, EGAF00001879283	primary	paired-end	yes	G12V	-
	PCSI_0613	EGAF00001844309, EGAF00001879288, EGAF00001879289	primary	paired-end	yes	G12D	-
	PCSI_0616	EGAF00001844310, EGAF00001879290, EGAF00001879291	primary	paired-end	yes	G12D	-
	PCSI_0623	EGAF00001844311, EGAF00001879292, EGAF00001879293	primary	paired-end	yes	G12V	-
	PCSI_0624	EGAF00001844312, EGAF00001879294, EGAF00001879295	primary	paired-end	yes	G12D	-
	PCSI_0625	EGAF00001844375, EGAF00001879298, EGAF00001879299	primary	paired-end	yes	G12D	-
	PCSI_0626	EGAF00001844376, EGAF00001879300, EGAF00001879301	primary	paired-end	yes	wt	-
	PCSI_0627	EGAF00001844408, EGAF00001879302, EGAF00001879303	primary	paired-end	yes	wt	-
	PCSI_0628	EGAF00001844409, EGAF00001879304, EGAF00001879305	primary	paired-end	yes	G12D	-
	PCSI_0629	EGAF00001844410, EGAF00001879306, EGAF00001879307	primary	paired-end	yes	G12V	-
	PCSI_0633	EGAF00001844411, EGAF00001879308, EGAF00001879309	primary	paired-end	yes	G12D	-
	PCSI_0638	EGAF00001844413, EGAF00001879312, EGAF00001879313	primary	paired-end	yes	G12D	-
	PCSI_0639	EGAF00001844414, EGAF00001879314, EGAF00001879315	primary	paired-end	yes	G12R	-
	PCSI_0642	EGAF00001844415, EGAF00001879316, EGAF00001879317	primary	paired-end	yes	G12V	-
	PCSI_0643	EGAF00001844417, EGAF00001879320, EGAF00001879321	primary	paired-end	yes	G12V	-
	PCSI_0645	EGAF00001844418, EGAF00001879322, EGAF00001879323	primary	paired-end	yes	G12R	-
	PCSI_0649	EGAF00001844419, EGAF00001879324, EGAF00001879325	primary	paired-end	yes	G12V	-
	PCSI_0652	EGAF00001844420, EGAF00001879326, EGAF00001879327	primary	paired-end	yes	G12V	-
	PCSI_0653	EGAF00001844421, EGAF00001879328, EGAF00001879329	primary	paired-end	yes	G12V	-
	PCSI_0655	EGAF00001844422, EGAF00001879330, EGAF00001879331	primary	paired-end	yes	G12D	-
	PCSI_0677	EGAF00001844423, EGAF00001878894, EGAF00001878895	primary	paired-end	yes	G12V	-
	PCSI_0694	EGAF00001844455, EGAF00001878896, EGAF00001878897	primary	paired-end	yes	G12V, V181A	-
	PCSI_0710	EGAF00001844456, EGAF00001878898, EGAF00001878899	primary	paired-end	yes	Q61H	-
	PCSI_0890	EGAF00001844457, EGAF00001878900, EGAF00001878901	primary	paired-end	yes	G12D	-
	RAMP_0002	EGAF00001844458, EGAF00001878902, EGAF00001878903	metastasis	paired-end	yes	wt	-
	RAMP_0004	EGAF00001844461, EGAF00001878908, EGAF00001878909	metastasis	paired-end	yes	G12D	-		N/A⁴			N/A³
	RAMP_0006	EGAF00001844464, EGAF00001878914, EGAF00001878915	metastasis	paired-end	yes	G12D	-
	RAMP_0007	EGAF00001844466, EGAF00001878918, EGAF00001878919	metastasis	paired-end	yes	G12D	-
	RAMP_0008	EGAF00001844468, EGAF00001878922, EGAF00001878923	metastasis	paired-end	yes	G12V	-
TCGA-PAAD	TCGA-2J-AAB1	66cf449f-2a46-411e-bb71-e5cc96917132	primary	paired-end	no	G12R	-
	TCGA-2J-AAB4	6fe298dd-6136-4d13-a339-8230d2b4c893	primary	paired-end	no	G12V	-
	TCGA-2J-AAB6	97c6e71b-616d-4af2-a2f2-408f35588719	primary	paired-end	no	G12V	-
	TCGA-2J-AAB8	3e7104ed-c522-4bbf-b7f3-e1f5ac48052b	primary	paired-end	no	G12R	-
	TCGA-2J-AAB9	745103cd-60aa-4289-91a5-c83b27e83268	primary	paired-end	no	G12D	-
	TCGA-2J-AABA	1820422e-b367-4b72-8af1-6f89600fb4f8	primary	paired-end	no	wt	-
	TCGA-2J-AABE	07dc55bd-b610-45ab-bc50-620b128ec261	primary	paired-end	no	G12R	-
	TCGA-2J-AABF	95aacdc4-4b85-455c-b3f4-446853afcb0c	primary	paired-end	no	G12D	-
	TCGA-2J-AABH	4333fe6d-0dd0-46bc-8328-31d5dd428667	primary	paired-end	no	G12I	-
	TCGA-2J-AABI	49097af0-245b-4c90-bd38-ebbc464c515c	primary	paired-end	no	G12R	-
	TCGA-2J-AABK	ea12afdc-3b6c-4dd2-ae61-96f43bc051d5	primary	paired-end	no	G12V	-
	TCGA-2J-AABO	56f04807-3fb6-477f-98dc-00938ae176d5	primary	paired-end	no	G12V	-
	TCGA-2J-AABP	d157e2a4-f136-4859-9e18-28bf312d506e	primary	paired-end	no	wt	-
	TCGA-2J-AABR	d2a4ac88-7f76-46cf-8197-2b2e5b4cd902	primary	paired-end	no	G12V	-
	TCGA-2J-AABT	daf44dd9-ad9a-4eca-83f7-0577a38093b2	primary	paired-end	no	G12R	-
	TCGA-2J-AABU	0c0cafa6-e9e6-4c63-a64c-26420e73f25c	primary	paired-end	no	G12R	-
	TCGA-2J-AABV	880b1a54-61b6-44be-9720-e09e6c171f7b	primary	paired-end	no	G12V	-
	TCGA-2L-AAQA	bf67f6e8-eafd-4bac-aba9-634ca70bdfc8	primary	paired-end	no	G12V	-
	TCGA-2L-AAQE	ebab1fb1-1976-48c7-8110-d688f5c6c92a	primary	paired-end	no	G12D	-
	TCGA-2L-AAQI	05e7dc6a-bf6b-4658-9b95-b007c9ae95ab	primary	paired-end	no	G12V	-
	TCGA-2L-AAQJ	b7bd0bca-fb69-4869-be28-038c7487f1f1	primary	paired-end	no	G12D	-
	TCGA-2L-AAQL	bd9301c6-a268-4d02-a4ee-4afa2e2ff209	primary	paired-end	no	Q61R	-
	TCGA-2L-AAQM	626770c8-7b4f-47b6-a33b-d4845e62943a	primary	paired-end	no	wt	-
	TCGA-3A-A9I5	163427ab-f1e7-4d63-91a0-66a0513ac795	primary	paired-end	no	wt	ATP1B1-NRG1	found	found	found	found	found	found	found
	TCGA-3A-A9I7	66c9782a-88f2-4734-a6e5-48e2dcfc551e	primary	paired-end	no	G12D	-
	TCGA-3A-A9I9	85558819-e3ae-4ad7-8476-593b2041e8b7	primary	paired-end	no	G12R	-
	TCGA-3A-A9IB	19fd795b-2c98-419b-a39a-66986cd20312	primary	paired-end	no	G12D	-
	TCGA-3A-A9IC	d2dcc520-547e-4c27-8037-5a4f41db67ae	primary	paired-end	no	G12R	-
	TCGA-3A-A9IH	eb7d94af-bfc2-45d6-b0a7-d5094cd31f9c	primary	paired-end	no	G12R	-
	TCGA-3A-A9IJ	2b2b1f5d-0cf8-4ab7-bd57-f2d65bf81272	primary	paired-end	no	wt	-
	TCGA-3A-A9IL	d6784278-10d9-498e-830e-c9af18f6f943	primary	paired-end	no	wt	-
	TCGA-3A-A9IN	8836a592-c8d9-4b40-a4a0-90c12c13bae0	primary	paired-end	no	wt	-
	TCGA-3A-A9IO	2538e74c-d8fc-4ac0-b09c-96b8acd87a8a	primary	paired-end	no	wt	-
	TCGA-3A-A9IR	43aad240-ff20-473b-aa86-c8318ee24ca6	primary	paired-end	no	wt	-
	TCGA-3A-A9IS	0ad71d76-1b02-419e-bf53-6e68977af4e4	primary	paired-end	no	wt	-
	TCGA-3A-A9IU	4590dcb7-648f-48dd-8de1-8139f3bb34f3	primary	paired-end	no	G12D	-
	TCGA-3A-A9IV	8ec7108d-5b31-4b45-8dfd-0b3e4d16eec2	primary	paired-end	no	wt	-
	TCGA-3A-A9IX	efc0c2ff-63c6-4028-a1c2-78bf63d04445	primary	paired-end	no	G12D	-
	TCGA-3A-A9IZ	731b0cd6-70e1-41c1-814c-9c9328d57a6c	primary	paired-end	no	G12D	-
	TCGA-3A-A9J0	1fcb6163-25a2-4d71-b46d-b4c76f7704db	primary	paired-end	no	wt	-
	TCGA-3E-AAAY	216f0e1f-9529-4fba-94bf-1c0aa60286b6	primary	paired-end	no	G12D	-
	TCGA-3E-AAAZ	09f7b1a6-b231-4a7f-a811-d4d5c4c9371a	primary	paired-end	no	G12V	-
	TCGA-F2-6879	72e9260c-6dd4-4184-97c2-6cf786917a76	primary	paired-end	no	G12V	-
	TCGA-F2-6880	40f0b900-634f-4c43-a2e0-625d12bfefab	primary	paired-end	no	wt	-
	TCGA-F2-7273	d0453faf-5274-42fa-968c-6f8851d4e802	primary	paired-end	no	G12D(?)	-
	TCGA-F2-7276	195457c4-3ebe-48be-b51a-e4c7d88ea74b	primary	paired-end	no	wt	-
	TCGA-F2-A44G	57d478fa-da62-472f-b960-1ef29927a686	primary	paired-end	no	G12D	-
	TCGA-F2-A44H	65d99cd1-7601-4dec-a9dd-e6d28880164d	primary	paired-end	no	wt	CUX1-BRAF	found	missed	found	missed	found	found	found
	TCGA-F2-A7TX	939e271e-8a3c-453a-b1e7-bf9efdd41ca7	primary	paired-end	no	G12D	-
	TCGA-F2-A8YN	81f032ec-edcf-4bc4-bba7-5f7cf33f1dbb	primary	paired-end	no	G12R	-
	TCGA-FB-A4P5	cf06a7e1-b0e4-4238-bf74-07c9f6a93ecc	primary	paired-end	no	G12D	-
	TCGA-FB-A4P6	770c53b4-b057-4cda-be1e-a5be11dfb363	primary	paired-end	no	G12V	-
	TCGA-FB-A545	9f1bafa7-551d-4653-8f5e-f44b9d6b5094	primary	paired-end	no	G12V	-
	TCGA-FB-A5VM	f8eb3fe8-03fb-4b45-ac99-241ec57ddd54	primary	paired-end	no	Q61H	-
	TCGA-FB-A78T	be193d16-fc86-4e31-82f2-21a7afb6796d	primary	paired-end	no	G12A, G13C	-
	TCGA-FB-A7DR	405dade5-4317-4f8d-8ee3-edad33151c84	primary	paired-end	no	G12V	-
	TCGA-FB-AAPP	43dc033e-ed48-486d-af91-7bef6ad03cdc	primary	paired-end	no	wt	EML4-NTRK3	found	found	found	found	found	found	found
	TCGA-FB-AAPQ	a11c57d1-c6b6-4951-90a1-fdd10c3c9de4	primary	paired-end	no	G12D	-
	TCGA-FB-AAPS	49e76520-07ff-41f7-a15b-6d8994dc39bc	primary	paired-end	no	G12D	-
	TCGA-FB-AAPU	862e03dc-1c3b-49ec-bca8-43a1c92b6515	primary	paired-end	no	G12R	-
	TCGA-FB-AAPY	271c5562-4fa4-403a-be2f-4bd42254a03e	primary	paired-end	no	G12D	-
	TCGA-FB-AAPZ	3a91a069-a53d-4a56-8163-ff9c62cb104f	primary	paired-end	no	G12R	-
	TCGA-FB-AAQ0	c41dfbd2-8821-470d-99f7-2fdacad08581	primary	paired-end	no	G12R	-
	TCGA-FB-AAQ1	99a222c8-30d0-4876-8afc-e6d5a1254ac1	primary	paired-end	no	G12D	-
	TCGA-FB-AAQ2	c58cd85a-1b62-4935-90cd-c3c488b35b6e	primary	paired-end	no	G12D	-
	TCGA-FB-AAQ3	96aa6793-3382-45c5-a8fc-bced1f6f15f9	primary	paired-end	no	G12D	-
	TCGA-FB-AAQ6	d6bed9f9-30be-465e-870a-b6bf6de32928	primary	paired-end	no	G12V	-
	TCGA-H6-8124	3711032a-d1d7-4e71-91fc-a8008ab5bc80	primary	paired-end	no	G12V	-
	TCGA-H6-A45N	168b4962-325b-4868-84f3-9f7c27888322	primary	paired-end	no	G12V	-
	TCGA-H8-A6C1	8aa92da6-d315-4601-b2d8-0befdd22a5a3	primary	paired-end	no	G12V	-
	TCGA-HV-A5A3	c07d0c1c-ebec-4528-b173-b4cbb6a92caf	primary	paired-end	no	G12D	-
	TCGA-HV-A5A4	c7da3fe6-5882-4bf3-9c93-d9837d1e245f	primary	paired-end	no	G12V	-
	TCGA-HV-A5A5	e61e1921-927a-4208-826f-ce5f28594a69	primary	paired-end	no	G12D	-
	TCGA-HV-A5A6	990d64b8-3171-48d9-94bb-bffb497a8a76	primary	paired-end	no	G12D	-
	TCGA-HV-A7OL	f7ae00c0-f6b7-4123-ba25-1e9a51050c7b	primary	paired-end	no	G12D	-
	TCGA-HV-A7OP	5a6401a8-7886-46ec-b14b-4a269836284a	primary	paired-end	no	G12D	-
	TCGA-HV-AA8V	c373cf4a-0ac7-45d7-9c0c-c633d9b915c7	primary	paired-end	no	G12V	-
	TCGA-HV-AA8X	90b8b714-d048-4868-86ab-45be26897d13	primary	paired-end	no	G12D	-
	TCGA-HZ-7289	de8f0d8c-341f-45d5-b8fb-1bdb445d278c	primary	paired-end	no	wt	-
	TCGA-HZ-7918	8a2f438c-93cd-43c0-97e1-28176d0b93ef	primary	paired-end	no	wt	CEL-NTRK1	found	found	found	found	found	found	found
	TCGA-HZ-7919	e1bdc2e7-cca6-4dd4-8b7d-869f0ffb85b7	primary	paired-end	no	G12R	-
	TCGA-HZ-7920	f41bbbc7-83f1-4b25-aa64-5cfb702bda2f	primary	paired-end	no	wt	-
	TCGA-HZ-7922	e496d0d9-e51f-49f8-a2ca-80777e0b585d	primary	paired-end	no	Q61H	-
	TCGA-HZ-7923	6ced37d6-476d-477e-8d93-b66d2219aebb	primary	paired-end	no	G12D(?)	-
	TCGA-HZ-7924	3874115d-ce95-4f90-aec9-3ea78dd69c7a	primary	paired-end	no	wt	-
	TCGA-HZ-7925	851adc03-9175-4ba9-b910-5d253865487b	primary	paired-end	no	G12V	-
	TCGA-HZ-7926	0ffe807f-6463-4409-afa7-763aa2a1ac31	primary	paired-end	no	G12D	-
	TCGA-HZ-8001	1e555d34-a377-4d42-82c0-5376e4a86224	primary	paired-end	no	G12V	-
	TCGA-HZ-8002	03b62a2b-ca27-4ce0-bfc7-b28ecdbb22a4	primary	paired-end	no	G12D	-
	TCGA-HZ-8003	10738fe5-2d2d-4548-9a41-805f2804e94a	primary	paired-end	no	G12R	-
	TCGA-HZ-8005	a173ecc2-c9e4-4bdd-95a7-855a915c6a3d	primary	paired-end	no	Q61H	-
	TCGA-HZ-8315	7ddb9a4e-f91b-497e-9770-e671562f2025	primary	paired-end	no	G12D	-
	TCGA-HZ-8317	1b77a433-8812-4bd9-8d58-c12e32418541	primary	paired-end	no	wt	-
	TCGA-HZ-8519	045c1807-df2b-4cb8-8e37-269eba60d401	primary	paired-end	no	G12D	-
	TCGA-HZ-8636	64c4b3ae-9dea-4b86-a0f1-405f2cc8c684	primary	paired-end	no	G12V	-
	TCGA-HZ-8637	485ce500-e501-408c-8df7-c280f5d0a523	primary	paired-end	no	G12V	-
	TCGA-HZ-8638	3e856df6-6e52-40b0-8b72-8a5263aaa98b	primary	paired-end	no	wt	-
	TCGA-HZ-A49G	feb2eec7-bd0f-4a58-b1b9-9e2ef6f5b5c2	primary	paired-end	no	G12D	-
	TCGA-HZ-A49H	fb3bd6c8-74fa-4639-a894-3e70b9812309	primary	paired-end	no	G12V	-
	TCGA-HZ-A49I	e9b94994-4516-4500-9f0e-ff86b59cf99d	primary	paired-end	no	G12D	-
	TCGA-HZ-A4BH	1d1b9872-dffe-405a-8cf8-1338696cede5	primary	paired-end	no	G12D	-
	TCGA-HZ-A4BK	892e2737-506c-4645-872b-6b1b884f260e	primary	paired-end	no	G12D	-
	TCGA-HZ-A77O	10dac41c-ae41-4890-9f40-cf43d34489c6	primary	paired-end	no	G12V	-
	TCGA-HZ-A77P	aa071a96-6957-4bf6-a55c-3a7553c609ae	primary	paired-end	no	G12V	-
	TCGA-HZ-A77Q	26438501-df6f-4242-a4f4-0cdfa96bc1d1	primary	paired-end	no	G12R	-
	TCGA-HZ-A8P0	d7a4711e-e306-4233-a0fd-23894f93c983	primary	paired-end	no	Q61H	-
	TCGA-HZ-A8P1	ba409a3f-0c9e-4578-b0d0-88d41696a718	primary	paired-end	no	G12D	-
	TCGA-HZ-A9TJ	34ce2b23-983a-4245-b074-8dfca44efd1f	primary	paired-end	no	G12V	-					N/A³
	TCGA-IB-7644	83b7e07a-f306-4c01-8948-c3fc3639560d	primary	paired-end	no	G12V	-
	TCGA-IB-7645	eda0d9c8-7224-4604-a6bf-68c259db906c	primary	paired-end	no	G12V	-
	TCGA-IB-7646	b489e5d7-da75-4c60-b57d-8342edf5dce0	primary	paired-end	no	G12D	-
	TCGA-IB-7649	ffae4666-da81-4e33-9c59-3420e58ac5e3	primary	paired-end	no	Q61H	-
	TCGA-IB-7651	5ede3945-aa2d-4b70-a262-80a89e4359ab	primary	paired-end	no	G12D	-
	TCGA-IB-7652	eda75591-4693-4c6c-84f2-42f7c4873cd2	primary	paired-end	no	G12R	-
	TCGA-IB-7654	8944933c-cbf1-4ffd-bb87-a4e006f75a7d	primary	paired-end	no	G12R	-
	TCGA-IB-7885	5b8f638b-4b3a-433c-8f2e-25088365dea6	primary	paired-end	no	G12V	-
	TCGA-IB-7886	508b5eea-62df-4717-92a9-c671ba740583	primary	paired-end	no	G12C	-
	TCGA-IB-7887	da552767-e03f-411a-86a2-ae8cabaec273	primary	paired-end	no	G12R	-
	TCGA-IB-7888	4f174940-f9a8-4114-8c4e-c0d792cc6ae8	primary	paired-end	no	G12R	-
	TCGA-IB-7889	debd692b-4173-4726-b4b8-ae2f41f19eff	primary	paired-end	no	G12V	-
	TCGA-IB-7890	c94d1742-b96f-4976-9b8e-d0402f67fd15	primary	paired-end	no	Q61R	-
	TCGA-IB-7891	74665600-b83c-4094-8dc4-ab5af9f6ffd3	primary	paired-end	no	G12D(?)	-
	TCGA-IB-7893	e4d4d91a-423e-4a71-93a3-4ab604da992b	primary	paired-end	no	G12D	-
	TCGA-IB-7897	e17b15e5-2c99-483c-a454-e38cf90a16cc	primary	paired-end	no	G12D	-
	TCGA-IB-8126	5b68faba-3cbe-4ae9-9758-48e30d7035ae	primary	paired-end	no	G12D	-
	TCGA-IB-8127	db46629a-7838-44a6-8c3c-41e38c889853	primary	paired-end	no	G12D	-
	TCGA-IB-A5SO	e21c888c-0fd8-4c8b-afe7-63f81b798bda	primary	paired-end	no	G12D	-
	TCGA-IB-A5SP	98f6e81a-63fb-4816-9a43-de761bed5968	primary	paired-end	no	G12D	-
	TCGA-IB-A5SQ	956ccc51-d32a-44ff-ab92-bf11232edb34	primary	paired-end	no	wt	-
	TCGA-IB-A5SS	7f8e0c5a-ba26-4300-9008-8a2df6aa525d	primary	paired-end	no	G12D	-
	TCGA-IB-A5ST	7c125425-21d5-4700-95d8-977cca275718	primary	paired-end	no	G12D	-
	TCGA-IB-A6UF	7812e50a-c533-4aa8-acfb-4a1dca8cfe71	primary	paired-end	no	G12R	-
	TCGA-IB-A6UG	b0682709-cc5d-4028-98fd-be5c9a564497	primary	paired-end	no	G12D	-
	TCGA-IB-A7LX	92df3e3f-8146-4d45-b4b6-c2885c27ce0b	primary	paired-end	no	G12D	-
	TCGA-IB-A7M4	fd65ed6c-1573-48a6-8034-25b4d34b637f	primary	paired-end	no	G12D	-
	TCGA-IB-AAUM	6bd520b4-7ef1-4082-bad8-92d0d65e2f1a	primary	paired-end	no	G12D	-
	TCGA-IB-AAUN	bf3b2444-17ed-47d7-8566-d31342d5881c	primary	paired-end	no	G12D	-
	TCGA-IB-AAUO	106d1e0e-cd27-4ce9-832f-20337978200a	primary	paired-end	no	G12D	-
	TCGA-IB-AAUP	076691eb-6c03-43e1-a458-d44f515fca63	primary	paired-end	no	G12D	-
	TCGA-IB-AAUQ	95d7cd34-7008-4004-9c16-d952f92f2ed8	primary	paired-end	no	G12D	-
	TCGA-IB-AAUR	f5fbecb7-da37-479b-a46f-ce56129dc523	primary	paired-end	no	G12R	-
	TCGA-IB-AAUS	86b0c895-2d38-497b-a1c1-f1a442c3bdce	primary	paired-end	no	G12D	-
	TCGA-IB-AAUT	07649f22-0d51-4bef-bd7e-db00aedf547a	primary	paired-end	no	wt	-
	TCGA-IB-AAUU	12363106-6276-4db1-a568-bb8fabf9e7bb	primary	paired-end	no	G12R	-
	TCGA-IB-AAUV	69ee0d2e-bee3-43bf-80fd-b6a8debd6bde	primary	paired-end	no	wt	-
	TCGA-IB-AAUW	9ee31f10-ae7d-4254-873c-5f7474c404b8	primary	paired-end	no	G12V	-
	TCGA-L1-A7W4	ee5eab34-8110-4db7-b2cc-ddd37d7b1eb4	primary	paired-end	no	G12D	-
	TCGA-LB-A7SX	afe46fc2-671f-4d2c-9dc0-8d5c7428dde9	primary	paired-end	no	wt	-
	TCGA-LB-A8F3	5e60cee6-72fc-46f2-92dd-3f11129797a7	primary	paired-end	no	wt	-
	TCGA-LB-A9Q5	d58472c7-c1c7-4538-86af-530f266e96d7	primary	paired-end	no	G12D	-
	TCGA-M8-A5N4	6e6832bc-c687-4a7c-8000-fca253c71be3	primary	paired-end	no	G12D	-
	TCGA-OE-A75W	039ff8f9-7073-467a-a487-a25ee660e77c	primary	paired-end	no	G12D	-
	TCGA-PZ-A5RE	999e2b4f-3ec5-4538-bdec-8cead9a3bb7b	primary	paired-end	no	Q61H	-
	TCGA-Q3-A5QY	8971cfde-2879-4c07-9f4d-c2d733803b57	primary	paired-end	no	G12V	-
	TCGA-Q3-AA2A	7132dd73-2c19-4659-b19a-8903cdc2aab6	primary	paired-end	no	G12V	-
	TCGA-RB-A7B8	c0e47a69-ff44-4326-a26d-accf0e2b05f7	primary	paired-end	no	G12R	-
	TCGA-RB-AA9M	5eca47d4-ed20-4715-a59d-6ead1e9231a6	primary	paired-end	no	G12V	-
	TCGA-RL-AAAS	ab9b82a9-fb07-4aca-bed9-0ec5a3ad4614	primary	paired-end	no	wt	-
	TCGA-S4-A8RM	79b216f7-0a79-4882-a9d1-894803b4ef67	primary	paired-end	no	G12V	-
	TCGA-S4-A8RO	f3cbed00-d4e5-40de-a107-b8fbf9cda3ba	primary	paired-end	no	G12D	-
	TCGA-S4-A8RP	f491c85a-e5e3-49c0-a940-5ea27faee1d7	primary	paired-end	no	G12R	-
	TCGA-US-A774	dd40cc2a-143d-4d16-87b9-2cbac67b4002	primary	paired-end	no	G12D, V152G	-
	TCGA-US-A776	b16e4fbd-98c8-41dd-950f-295a2ff0c973	primary	paired-end	no	wt	-
	TCGA-US-A779	c2b034b6-00c1-4dfe-b131-2e31ec231d17	primary	paired-end	no	G12D	-
	TCGA-US-A77E	6de6a567-1684-4113-8d3f-31968b3429c0	primary	paired-end	no	wt	-
	TCGA-US-A77G	183dd59a-0235-4b49-b2f7-11ebd5a26aca	primary	paired-end	no	G12R	-
	TCGA-US-A77J	dd0b23b3-b6f6-4afa-9843-db9629f16cb5	primary	paired-end	no	G12D(?)	-
	TCGA-XD-AAUG	1489752a-94ec-4690-ab6b-a71436ae43ea	primary	paired-end	no	G12D	-
	TCGA-XD-AAUH	072f0f9c-580a-489a-bbd2-80802a6d5dce	primary	paired-end	no	G12D	-
	TCGA-XD-AAUI	8a98995b-5a5c-4dc2-86ba-24218e77f08f	primary	paired-end	no	G12D	-
	TCGA-XD-AAUL	e18ffc9a-45ef-487a-a4b2-d7479188beb2	primary	paired-end	no	G12R	-
	TCGA-XN-A8T3	1585e078-72f1-4175-96ef-8edf375ef847	primary	paired-end	no	G12D	-
	TCGA-XN-A8T5	6ba0a6bc-2d23-436e-9a86-0d8e43374dab	primary	paired-end	no	G12R	-
	TCGA-YB-A89D	f8af732d-591f-4ccb-9ea7-19188d101bfd	primary	paired-end	no	G12R	-
	TCGA-YH-A8SY	0660e756-f5d7-4c40-bf6c-b16c1998c489	primary	paired-end	no	G12V	-
	TCGA-YY-A8LH	c2ec8926-de77-4c56-aaeb-d39f6a0cbc00	primary	paired-end	no	G12V	-
	TCGA-Z5-AAPL	c018a367-905d-40bb-87aa-22d653073c09	primary	paired-end	no	G12V	-
This study EGAD00001005069	Patient A	EGAF00002486941	primary	paired-end	yes	wt	RASGRP1-ATP1A1	found	found	found	found	found	found	found
Heining et al. EGAD00001004068	Patient 1	EGAF00001984697	metastasis	paired-end	no	G12R	-
	Patient 2	EGAF00001984700	metastasis	paired-end	no	G12D	-
	Patient 3	EGAF00001984703	primary	paired-end	no	G12V	-
	Patient 4	EGAF00001984706	metastasis	paired-end	no	G12D	-
	Patient 5	EGAF00001984747	primary	paired-end	no	G12D	-
	Patient 7	EGAF00001984711	metastasis	paired-end	no	G12V	-
	Patient 8	EGAF00001984714	primary	paired-end	no	G12V	-
	Patient 9	EGAF00001984717	metastasis	paired-end	no	G12V	-
	Patient 10	EGAF00001984720	primary	paired-end	no	G12D	-
	Patient 11	EGAF00001984727	metastasis	paired-end	no	G12D	-
	Patient 12	EGAF00001984733	primary	paired-end	yes	G12V	-
	Patient 13	EGAF00001984736	metastasis	paired-end	yes	G12R	-
	Patient 14	EGAF00001984739	primary	paired-end	yes	wt	ATP1B1-NRG1	found	found	found	missed	found	found	found
	Patient 15	EGAF00001984744	metastasis	paired-end	no	wt	NRG1-CDH6	found	found	found	found	found	found	found
	Patient 17	EGAF00001984730	primary	paired-end	yes	wt	NCOA4-RET	found	missed	found	found	missed	missed	missed
	PDCM	EGAF00001984748	PDCM	paired-end	yes	wt	ATP1B1-PRKACA	found	found	found	found	found	found	found
Witkiewicz et al. SRP077921	EMC114	SRR3743549, SRR3743560	PDCM	paired-end	no	G12V	-
	EMC1222	SRR3743551, SRR3743552, SRR3743561, SRR3743568, SRR3743582, SRR3743583, SRR3743584, SRR3743537, SRR3743544, SRR3743547	PDCM	paired-end	no	G12D	-
	EMC1229	SRR3743543	PDCM	paired-end	no	G12D	-
	EMC18128	SRR3743572, SRR3743539, SRR3743570, SRR3743571	PDCM	paired-end	no	G12R, G12V	-
	EMC2095	SRR3743596, SRR3743540, SRR3743594, SRR3743595	PDCM	paired-end	no	wt	-					N/A³
	EMC226	SRR3743555, SRR3743556, SRR3743557, SRR3743569, SRR3743585, SRR3743586, SRR3743587, SRR3743550, SRR3743553, SRR3743554	PDCM	paired-end	no	G12R	-
	EMC29	SRR3743588, SRR3743589, SRR3743590, SRR3743558, SRR3743559, SRR3743562	PDCM	paired-end	no	G12V	-
	EMC3226	SRR3743541	PDCM	paired-end	no	G12D	-
	EMC41	SRR3743542, SRR3743548	PDCM	paired-end	no	G12V	-
	EMC43	SRR3743598, SRR3743599, SRR3743533, SRR3743534, SRR3743597	PDCM	paired-end	no	G12D	-
	EMC514	SRR3743538	PDCM	paired-end	no	G12V	-
	EMC519	SRR3743575, SRR3743563, SRR3743573, SRR3743574	PDCM	paired-end	no	G12D	-
	EMC7310	SRR3743578, SRR3743564, SRR3743576, SRR3743577	PDCM	paired-end	no	G12V	-					N/A³
	EMC810	SRR3743591, SRR3743592, SRR3743593	PDCM	paired-end	no	G12D	-
	EMC827	SRR3743600, SRR3743601, SRR3743602	PDCM	paired-end	no	G12D	-					N/A³
	EMC828	SRR3743566, SRR3743567, SRR3743579, SRR3743580, SRR3743581, SRR3743545, SRR3743546, SRR3743565	PDCM	paired-end	no	G12D	-
	EMCT2	SRR3743604, SRR3743605, SRR3743535, SRR3743536, SRR3743603	PDCM	paired-end	no	G12R	-					N/A³
Lin et al. SRP161484	Patient 1	SRR7818905	metastasis	paired-end	no	G12D(?)	-
	Patient 2	SRR7818906	primary	paired-end	no	wt	-
	Patient 3	SRR7818907	primary	paired-end	no	G12V	-
	Patient 4	SRR7818908	primary	paired-end	no	G12D	-
	Patient 5	SRR7818909	primary	paired-end	no	G12D	-
	Patient 6	SRR7818910	metastasis	paired-end	no	wt	-
	Patient 7	SRR7818911	primary	paired-end	no	G12D	-
	Patient 8	SRR7818912	metastasis	paired-end	no	G12V	-
	Patient 9	SRR7818913	metastasis	paired-end	no	G12R	-
	Patient 10	SRR7818914	primary	paired-end	no	G12V	-
Maurer et al. SRP096338	CUMC1	SRR5163409, SRR5163410	primary	single-end	no	G13C(?)	-		N/A²	N/A²		N/A²	N/A²
	CUMC3	SRR5163413	primary	single-end	no	G12D(?)	-		N/A²	N/A²		N/A²	N/A²
	CUMC5	SRR5163415	primary	single-end	no	wt	-		N/A²	N/A²		N/A²	N/A²
	CUMC7	SRR5163417	primary	single-end	no	G12V	-		N/A²	N/A²		N/A²	N/A²
	CUMC9	SRR5163419	primary	single-end	no	G12R(?)	-		N/A²	N/A²		N/A²	N/A²
	CUMC11	SRR5163421	primary	single-end	no	wt	-		N/A²	N/A²		N/A²	N/A²
	CUMC14	SRR5163425	primary	single-end	no	G12R(?)	-		N/A²	N/A²		N/A²	N/A²
	CUMC16	SRR5163427, SRR5163428	primary	single-end	no	wt	-		N/A²	N/A²		N/A²	N/A²
	CUMC18	SRR5163431, SRR5163432	primary	single-end	no	Q61H	-		N/A²	N/A²		N/A²	N/A²
	CUMC20	SRR5163435, SRR5163436	primary	single-end	no	G12V(?)	-		N/A²	N/A²		N/A²	N/A²
	CUMC22	SRR5163439, SRR5163440	primary	single-end	no	G12D	-		N/A²	N/A²		N/A²	N/A²
	CUMC23	SRR5163441	primary	single-end	no	G12R	-		N/A²	N/A²		N/A²	N/A²
	CUMC24	SRR5163442	primary	single-end	no	G12R	-		N/A²	N/A²		N/A²	N/A²
	CUMC27	SRR5163445	primary	single-end	no	G12D	-		N/A²	N/A²		N/A²	N/A²
	CUMC29	SRR5163447	primary	single-end	no	wt	-		N/A²	N/A²		N/A²	N/A²
	CUMC31	SRR5163449	primary	single-end	no	G12D, R149S	-		N/A²	N/A²		N/A²	N/A²
	CUMC33	SRR5163451	primary	single-end	no	G12D(?), E143D	-		N/A²	N/A²		N/A²	N/A²
	CUMC35	SRR5163453	primary	single-end	no	G12D	-		N/A²	N/A²		N/A²	N/A²
	CUMC37	SRR5163455	primary	single-end	no	wt	-		N/A²	N/A²		N/A²	N/A²
	CUMC39	SRR5163457	primary	single-end	no	wt	-		N/A²	N/A²		N/A²	N/A²
	CUMC41	SRR5163459	primary	single-end	no	G12R	-		N/A²	N/A²		N/A²	N/A²
	CUMC43	SRR5163461	primary	single-end	no	wt	-		N/A²	N/A²		N/A²	N/A²
	CUMC45	SRR5163463	primary	single-end	no	G12V	-		N/A²	N/A²		N/A²	N/A²
	CUMC47	SRR5163465	primary	single-end	no	wt	-		N/A²	N/A²		N/A²	N/A²
	CUMC49	SRR5163467	primary	single-end	no	G12D	-		N/A²	N/A²		N/A²	N/A²
	CUMC51	SRR5163469	primary	single-end	no	G12D	-		N/A²	N/A²		N/A²	N/A²
	CUMC52	SRR5163470	primary	single-end	no	wt	-		N/A²	N/A²		N/A²	N/A²
	CUMC55	SRR5163473	primary	single-end	no	G12V	-		N/A²	N/A²		N/A²	N/A²
	CUMC58	SRR5163476	primary	single-end	no	G12D	-		N/A²	N/A²		N/A²	N/A²
	CUMC59	SRR5163477	primary	single-end	no	G12V	-		N/A²	N/A²		N/A²	N/A²
	CUMC61	SRR5163479	primary	single-end	no	G12D	-		N/A²	N/A²		N/A²	N/A²
	CUMC63	SRR5163481	primary	single-end	no	G12D, F78L	-		N/A²	N/A²		N/A²	N/A²
	CUMC65	SRR5163483	primary	single-end	no	G12R(?)	-		N/A²	N/A²		N/A²	N/A²
	CUMC67	SRR5163485	primary	single-end	no	G12R	-		N/A²	N/A²		N/A²	N/A²
	CUMC69	SRR5163487	primary	single-end	no	G12D	-		N/A²	N/A²		N/A²	N/A²
	CUMC71	SRR5163489	primary	single-end	no	wt	-		N/A²	N/A²		N/A²	N/A²
	CUMC73	SRR5163491	primary	single-end	no	G12D	-		N/A²	N/A²		N/A²	N/A²
	CUMC75	SRR5163493	primary	single-end	no	G12D	-		N/A²	N/A²		N/A²	N/A²
	CUMC77	SRR5163495	primary	single-end	no	wt	-		N/A²	N/A²		N/A²	N/A²
	CUMC79	SRR5163497	primary	single-end	no	G12D	-		N/A²	N/A²		N/A²	N/A²
	CUMC81	SRR5163499	primary	single-end	no	G12V, S65G	-		N/A²	N/A²		N/A²	N/A²
	CUMC83	SRR5163501	primary	single-end	no	G12D	-		N/A²	N/A²		N/A²	N/A²
	CUMC85	SRR5163503	primary	single-end	no	G12R	-		N/A²	N/A²		N/A²	N/A²
	CUMC87	SRR5163505	primary	single-end	no	G13P,	-		N/A²	N/A²		N/A²	N/A²
	CUMC89	SRR5163507	primary	single-end	no	wt	-		N/A²	N/A²		N/A²	N/A²
	CUMC91	SRR5163509	primary	single-end	no	G12V	-		N/A²	N/A²		N/A²	N/A²
	CUMC93	SRR5163511	primary	single-end	no	G12D	-		N/A²	N/A²		N/A²	N/A²
	CUMC95	SRR5163513	primary	single-end	no	wt	-		N/A²	N/A²		N/A²	N/A²
	CUMC97	SRR5163515	primary	single-end	no	G12V	-		N/A²	N/A²		N/A²	N/A²
	CUMC99	SRR5163517	primary	single-end	no	G12D	-		N/A²	N/A²		N/A²	N/A²
	CUMC101	SRR5163519	primary	single-end	no	G12R	-		N/A²	N/A²		N/A²	N/A²
	CUMC103	SRR5163521	primary	single-end	no	G12V	-		N/A²	N/A²		N/A²	N/A²
	CUMC105	SRR5163523	primary	single-end	no	wt	-		N/A²	N/A²		N/A²	N/A²
	CUMC107	SRR5163525	primary	single-end	no	wt	-		N/A²	N/A²		N/A²	N/A²
	CUMC109	SRR5163527	primary	single-end	no	G12D	-		N/A²	N/A²		N/A²	N/A²
	CUMC111	SRR5163529	primary	single-end	no	Q61L	-		N/A²	N/A²		N/A²	N/A²
	CUMC113	SRR5163531	primary	single-end	no	G12V	-		N/A²	N/A²		N/A²	N/A²
	CUMC115	SRR5163533	primary	single-end	no	G12V, M111I	-		N/A²	N/A²		N/A²	N/A²
	CUMC117	SRR5163535	primary	single-end	no	G12D	-		N/A²	N/A²		N/A²	N/A²
	CUMC119	SRR5163537	primary	single-end	no	wt	-		N/A²	N/A²		N/A²	N/A²
	CUMC121	SRR5163539	primary	single-end	no	G12V	-		N/A²	N/A²		N/A²	N/A²
	CUMC123	SRR5163541	primary	single-end	no	G12D(?)	-		N/A²	N/A²		N/A²	N/A²
	CUMC125	SRR5163543	primary	single-end	no	G12D	-		N/A²	N/A²		N/A²	N/A²
	CUMC126	SRR5163544	primary	single-end	no	wt	-		N/A²	N/A²		N/A²	N/A²
	CUMC127	SRR5163545	primary	single-end	no	G12V	-		N/A²	N/A²		N/A²	N/A²
	CUMC128	SRR5163546	primary	single-end	no	G12D	-		N/A²	N/A²		N/A²	N/A²
	CUMC129	SRR5163547	primary	single-end	no	wt	-		N/A²	N/A²		N/A²	N/A²
	CUMC130	SRR5163548	primary	single-end	no	G12D(?)	-		N/A²	N/A²		N/A²	N/A²
	CUMC131	SRR5163549	primary	single-end	no	G12D	-		N/A²	N/A²		N/A²	N/A²
	CUMC133	SRR5163551	primary	single-end	no	G12S(?)	-		N/A²	N/A²		N/A²	N/A²
	CUMC135	SRR5163553	primary	single-end	no	G12D	-		N/A²	N/A²		N/A²	N/A²
	CUMC137	SRR5163555	primary	single-end	no	G12V	-		N/A²	N/A²		N/A²	N/A²
	CUMC139	SRR5163557	primary	single-end	no	Q61K(?)	-		N/A²	N/A²		N/A²	N/A²
	CUMC141	SRR5163559	primary	single-end	no	wt	-		N/A²	N/A²		N/A²	N/A²
	CUMC153	SRR5163571	primary	single-end	no	G12R	-		N/A²	N/A²		N/A²	N/A²
	CUMC154	SRR5163572	primary	single-end	no	G12R	-		N/A²	N/A²		N/A²	N/A²
	CUMC155	SRR5163573	primary	single-end	no	wt	-		N/A²	N/A²		N/A²	N/A²
	CUMC156	SRR5163574	primary	single-end	no	G12R	-		N/A²	N/A²		N/A²	N/A²
	CUMC157	SRR5163575	primary	single-end	no	G12L	-		N/A²	N/A²		N/A²	N/A²
	CUMC158	SRR5163576	primary	single-end	no	wt	-		N/A²	N/A²		N/A²	N/A²
	CUMC159	SRR5163577	primary	single-end	no	Q61H	-		N/A²	N/A²		N/A²	N/A²
SRP158639	PC0002T	SRR7741915		paired-end	no	G12V	-
	PC0004T	SRR7741914		paired-end	no	G12V	-
	PC0005C	SRR7741917		paired-end	no	G12V	-
	PC0008C	SRR7741916		paired-end	no	G12V	-
	PC0010T	SRR7741911		paired-end	no	G12V	-
	PC0015T	SRR7741910		paired-end	no	G12V	-
	PC0016T	SRR7741913		paired-end	no	G12D	-
	PC0017M	SRR7741912		paired-end	no	G12V	-
	PC0018C	SRR7741919		paired-end	no	G12D	-						N/A⁴
	PC00216944T	SRR7741918		paired-end	no	G12D	-
	PC00881016T	SRR7741889		paired-end	no	G12V	-
	PC00912481T	SRR7741888		paired-end	no	G12D	-
	PC14112102C	SRR7741887		paired-end	no	G12R	-
	PC14112401C	SRR7741886		paired-end	no	G12D	-
	PC15031901T	SRR7741885		paired-end	no	G12V	-
	PC15032001T	SRR7741884		paired-end	no	G12D	-
	PC15032302T	SRR7741883		paired-end	no	G12D	-
	PC15032503T	SRR7741882		paired-end	no	G12V	-
	PC15040801T	SRR7741890		paired-end	no	G12D, V14A	-
	PC15042202T	SRR7741909		paired-end	no	wt	-
	PC15051201T	SRR7741906		paired-end	no	G12D	-
	PC15051801T	SRR7741904		paired-end	no	G12D	-
	PC15051803T	SRR7741902		paired-end	no	G12V	-
	PC15051901T	SRR7741903		paired-end	no	wt	-
	PC15052004T	SRR7741900		paired-end	no	G12V	-
	PC15052203T	SRR7741901		paired-end	no	G12R	-
	PC15052503T	SRR7741881		paired-end	no	wt	-
	PC15052601T	SRR7741875		paired-end	no	G12D	-
	PC15052703T	SRR7741874		paired-end	no	G12V	-
	PC15052704T	SRR7741877		paired-end	no	G12D	-
	PC15060101T	SRR7741876		paired-end	no	G12V	-
	PC15060402T	SRR7741873		paired-end	no	G12V	-
	PC15060502T	SRR7741872		paired-end	no	G13D	-
	PC15060802T	SRR7741898		paired-end	no	G12V	-
	PC15060804T	SRR7741899		paired-end	no	G12R	-
	PC15061602T	SRR7741892		paired-end	no	G12V	-
	PC15061702T	SRR7741893		paired-end	no	G12D	-
	PC15061703T	SRR7741894		paired-end	no	G12D	-
	PC15062601T	SRR7741895		paired-end	no	G12D	-
	PC15062602T	SRR7741896		paired-end	no	G12V	-
	Y0004T	SRR7741897		paired-end	no	G12V	-
							Total found:	30	23	27	20	19	22	24
